# Supplementary material for: Crossing host boundaries: the evolutionary drivers and correlates of viral host jumps
Source: Research Square preprint supplement (doi:10.21203/rs.3.rs-3318101/v1), 2023-10-09
Supplement: Supplementary file 2 [file 991fb1b746cba25e61355a76.xlsx]

## Sheet: final_cluster_metadata.220723
accession	viral clique	genbank_title	family	genus	species	isolation_source	imputed_date	country	genome_length	molecule_type	is_segmented	is_circular	host
AB551247.1	Coronaviridae_1	Murine hepatitis virus RNA, complete genome, strain: MHV-MI	Coronaviridae	Betacoronavirus	Murine coronavirus		1994-06-01	Australia	31428	ssRNA(+)	FALSE	FALSE	Mus musculus
AB691764.2	Coronaviridae_2	Human coronavirus 229E Sendai-H/1121/04 RNA, complete genome	Coronaviridae	Alphacoronavirus	Human coronavirus 229E		2004-06-01	Japan	27259	ssRNA(+)	FALSE	FALSE	Homo sapiens
AB691767.2	Coronaviridae_2	Human coronavirus 229E Niigata/01/08 RNA, complete genome	Coronaviridae	Alphacoronavirus	Human coronavirus 229E		2008-06-01	Japan	27252	ssRNA(+)	FALSE	FALSE	Homo sapiens
DQ182595.1	Coronaviridae_3	SARS coronavirus ZJ0301 from China, complete genome	Coronaviridae	Betacoronavirus	Severe acute respiratory syndrome-related coronavirus		2003-04-21	China	29706	ssRNA(+)	FALSE	FALSE
DQ811784.2	Coronaviridae_4	Bovine coronavirus DB2, complete genome	Coronaviridae	Betacoronavirus	Betacoronavirus 1		1983-06-01		31007	ssRNA(+)	FALSE	FALSE	Bos taurus
DQ811786.2	Coronaviridae_5	TGEV Miller M60, complete genome	Coronaviridae	Alphacoronavirus	Alphacoronavirus 1		1987-06-01	USA	27904	ssRNA(+)	FALSE	FALSE	Sus scrofa
DQ811789.2	Coronaviridae_5	TGEV virulent Purdue, complete genome	Coronaviridae	Alphacoronavirus	Alphacoronavirus 1		1952-06-01	USA	28544	ssRNA(+)	FALSE	FALSE	Sus scrofa
EU714028.1	Coronaviridae_6	Infectious bronchitis virus isolate ZJ971, complete genome	Coronaviridae	Gammacoronavirus	Avian coronavirus	abdominal cavity	1997-06-01	China	27640	ssRNA(+)	FALSE	FALSE	Gallus gallus
EU714029.1	Coronaviridae_6	Infectious bronchitis virus isolate SC021202, complete genome	Coronaviridae	Gammacoronavirus	Avian coronavirus		2002-11-15	China	27660	ssRNA(+)	FALSE	FALSE	Gallus gallus
FJ376619.2	Coronaviridae_7	Bulbul coronavirus HKU11-934, complete genome	Coronaviridae	Deltacoronavirus	Bulbul coronavirus HKU11		2007-01-15	Hong Kong	26487	ssRNA(+)	FALSE	FALSE	Pycnonotus jocosus
FJ376620.1	Coronaviridae_7	Bulbul coronavirus HKU11-796, complete genome	Coronaviridae	Deltacoronavirus	Bulbul coronavirus HKU11		2007-01-15	Hong Kong	26476	ssRNA(+)	FALSE	FALSE	Pycnonotus sinensis
FJ376621.1	Coronaviridae_8	Thrush coronavirus HKU12-600, complete genome	Coronaviridae	Deltacoronavirus	Thrush coronavirus HKU12-600		2007-01-15	Hong Kong	26396	ssRNA(+)	FALSE	FALSE	Turdus hortulorum
FJ376622.1	Coronaviridae_9	Munia coronavirus HKU13-3514, complete genome	Coronaviridae	Deltacoronavirus	Munia coronavirus HKU13		2007-04-15	Hong Kong	26552	ssRNA(+)	FALSE	FALSE	Lonchura striata
FJ415324.1	Coronaviridae_4	Human enteric coronavirus 4408, complete genome	Coronaviridae	Betacoronavirus	Betacoronavirus 1		1988-06-01	Germany	31029	ssRNA(+)	FALSE	FALSE	Homo sapiens
FJ425184.1	Coronaviridae_4	Waterbuck coronavirus US/OH-WD358-TC/1994, complete genome	Coronaviridae	Betacoronavirus	Betacoronavirus 1		1994-01-01	USA	30995	ssRNA(+)	FALSE	FALSE	Kobus ellipsiprymnus
FJ425185.1	Coronaviridae_4	Waterbuck coronavirus US/OH-WD358-GnC/1994, complete genome	Coronaviridae	Betacoronavirus	Betacoronavirus 1		1994-01-01	USA	30940	ssRNA(+)	FALSE	FALSE	Kobus ellipsiprymnus
FJ425186.1	Coronaviridae_4	Waterbuck coronavirus US/OH-WD358/1994, complete genome	Coronaviridae	Betacoronavirus	Betacoronavirus 1		1994-01-01	USA	30962	ssRNA(+)	FALSE	FALSE	Kobus ellipsiprymnus
FJ425187.1	Coronaviridae_4	White-tailed deer coronavirus US/OH-WD470/1994, complete genome	Coronaviridae	Betacoronavirus	Betacoronavirus 1		1994-01-01	USA	31020	ssRNA(+)	FALSE	FALSE	Odocoileus virginianus
FJ425188.1	Coronaviridae_4	Sambar deer coronavirus US/OH-WD388-TC/1994, complete genome	Coronaviridae	Betacoronavirus	Betacoronavirus 1		1994-01-01	USA	30995	ssRNA(+)	FALSE	FALSE	Rusa unicolor
FJ425189.1	Coronaviridae_4	Sambar deer coronavirus US/OH-WD388/1994, complete genome	Coronaviridae	Betacoronavirus	Betacoronavirus 1		1994-01-01	USA	30997	ssRNA(+)	FALSE	FALSE	Rusa unicolor
FJ425190.1	Coronaviridae_4	Sambar deer coronavirus US/OH-WD388-TC/1994 calf-passaged, complete genome	Coronaviridae	Betacoronavirus	Betacoronavirus 1		1994-01-01	USA	30987	ssRNA(+)	FALSE	FALSE	Rusa unicolor
FJ588686.1	Coronaviridae_3	Bat SARS CoV Rs672/2006, complete genome	Coronaviridae	Betacoronavirus	Severe acute respiratory syndrome-related coronavirus		2006-06-01	China	29059	ssRNA(+)	FALSE	FALSE	Rhinolophus sinicus
FJ755618.2	Coronaviridae_5	Transmissible gastroenteritis virus strain H16, complete genome	Coronaviridae	Alphacoronavirus	Alphacoronavirus 1		1973-06-01	China	28569	ssRNA(+)	FALSE	FALSE	Sus scrofa
FJ882963.1	Coronaviridae_3	SARS coronavirus P2, complete genome	Coronaviridae	Betacoronavirus	Severe acute respiratory syndrome-related coronavirus		2004-08-10	USA	29682	ssRNA(+)	FALSE	FALSE	Homo sapiens
FJ888351.1	Coronaviridae_6	Infectious bronchitis virus strain H120, complete genome	Coronaviridae	Gammacoronavirus	Avian coronavirus		1960-06-01	Netherlands	27652	ssRNA(+)	FALSE	FALSE	Gallus gallus
FJ904713.1	Coronaviridae_6	Infectious bronchitis virus strain Mass41 2006, complete genome	Coronaviridae	Gammacoronavirus	Avian coronavirus		2006-06-01	USA	27660	ssRNA(+)	FALSE	FALSE	Gallus gallus
FJ904714.1	Coronaviridae_6	Infectious bronchitis virus strain Cal 1995, complete genome	Coronaviridae	Gammacoronavirus	Avian coronavirus		1995-06-01	USA	27664	ssRNA(+)	FALSE	FALSE	Gallus gallus
FJ904715.1	Coronaviridae_6	Infectious bronchitis virus strain Cal557 2003, complete genome	Coronaviridae	Gammacoronavirus	Avian coronavirus		2003-06-01	USA	27615	ssRNA(+)	FALSE	FALSE	Gallus gallus
FJ904716.1	Coronaviridae_6	Infectious bronchitis virus strain Conn46 1996, complete genome	Coronaviridae	Gammacoronavirus	Avian coronavirus		1966-06-01	USA	27629	ssRNA(+)	FALSE	FALSE	Gallus gallus
FJ904717.1	Coronaviridae_6	Infectious bronchitis virus strain Conn46 1972, complete genome	Coronaviridae	Gammacoronavirus	Avian coronavirus		1972-06-01	USA	27632	ssRNA(+)	FALSE	FALSE	Gallus gallus
FJ904718.1	Coronaviridae_6	Infectious bronchitis virus strain Conn46 1983, complete genome	Coronaviridae	Gammacoronavirus	Avian coronavirus		1983-06-01	USA	27632	ssRNA(+)	FALSE	FALSE	Gallus gallus
FJ904719.1	Coronaviridae_6	Infectious bronchitis virus strain Conn46 1991, complete genome	Coronaviridae	Gammacoronavirus	Avian coronavirus		1991-06-01	USA	27632	ssRNA(+)	FALSE	FALSE	Gallus gallus
FJ904720.1	Coronaviridae_6	Infectious bronchitis virus strain Mass41 1965, complete genome	Coronaviridae	Gammacoronavirus	Avian coronavirus		1965-06-01	USA	27474	ssRNA(+)	FALSE	FALSE	Gallus gallus
FJ904721.1	Coronaviridae_6	Infectious bronchitis virus strain Mass41 1972, complete genome	Coronaviridae	Gammacoronavirus	Avian coronavirus		1972-06-01	USA	27474	ssRNA(+)	FALSE	FALSE	Gallus gallus
FJ904722.1	Coronaviridae_6	Infectious bronchitis virus strain Mass41 1979, complete genome	Coronaviridae	Gammacoronavirus	Avian coronavirus		1979-06-01	USA	27614	ssRNA(+)	FALSE	FALSE	Gallus gallus
FJ904723.1	Coronaviridae_6	Infectious bronchitis virus strain Mass41 1985, complete genome	Coronaviridae	Gammacoronavirus	Avian coronavirus		1985-06-01	USA	27474	ssRNA(+)	FALSE	FALSE	Gallus gallus
FJ938051.1	Coronaviridae_10	Feline coronavirus RM, complete genome	Coronaviridae	Alphacoronavirus	Alphacoronavirus 1		2002-01-28	USA	29232	ssRNA(+)	FALSE	FALSE	Felis catus
FJ938052.1	Coronaviridae_10	Feline coronavirus UU11, complete genome	Coronaviridae	Alphacoronavirus	Alphacoronavirus 1		2007-06-05	Netherlands	29306	ssRNA(+)	FALSE	FALSE	Felis catus
FJ938053.1	Coronaviridae_10	Feline coronavirus UU7, complete genome	Coronaviridae	Alphacoronavirus	Alphacoronavirus 1		2007-04-25	Netherlands	29277	ssRNA(+)	FALSE	FALSE	Felis catus
FJ938054.1	Coronaviridae_10	Feline coronavirus UU4, complete genome	Coronaviridae	Alphacoronavirus	Alphacoronavirus 1		2007-02-02	Netherlands	29269	ssRNA(+)	FALSE	FALSE	Felis catus
FJ938055.1	Coronaviridae_10	Feline coronavirus UU8, complete genome	Coronaviridae	Alphacoronavirus	Alphacoronavirus 1		2007-05-24	Netherlands	29285	ssRNA(+)	FALSE	FALSE	Felis catus
FJ938056.1	Coronaviridae_10	Feline coronavirus UU5, complete genome	Coronaviridae	Alphacoronavirus	Alphacoronavirus 1		2007-03-07	Netherlands	29253	ssRNA(+)	FALSE	FALSE	Felis catus
FJ938057.1	Coronaviridae_10	Feline coronavirus UU15, complete genome	Coronaviridae	Alphacoronavirus	Alphacoronavirus 1		2007-07-13	Netherlands	29275	ssRNA(+)	FALSE	FALSE	Felis catus
FJ938058.1	Coronaviridae_10	Feline coronavirus UU16, complete genome	Coronaviridae	Alphacoronavirus	Alphacoronavirus 1		2007-06-07	Netherlands	28479	ssRNA(+)	FALSE	FALSE	Felis catus
FJ938059.1	Coronaviridae_10	Feline coronavirus UU10, complete genome	Coronaviridae	Alphacoronavirus	Alphacoronavirus 1		2007-06-05	Netherlands	29295	ssRNA(+)	FALSE	FALSE	Felis catus
FJ938060.1	Coronaviridae_10	Feline coronavirus UU2, complete genome	Coronaviridae	Alphacoronavirus	Alphacoronavirus 1		1993-03-30	USA	29256	ssRNA(+)	FALSE	FALSE	Felis catus
FJ938061.1	Coronaviridae_10	Feline coronavirus UU3, complete genome	Coronaviridae	Alphacoronavirus	Alphacoronavirus 1		1998-03-10	USA	29130	ssRNA(+)	FALSE	FALSE	Felis catus
FJ938062.1	Coronaviridae_10	Feline coronavirus UU9, complete genome	Coronaviridae	Alphacoronavirus	Alphacoronavirus 1		2007-05-24	Netherlands	29266	ssRNA(+)	FALSE	FALSE	Felis catus
FJ938063.1	Coronaviridae_4	Bovine coronavirus E-DB2-TC, complete genome	Coronaviridae	Betacoronavirus	Betacoronavirus 1		1996-11-30	USA	31024	ssRNA(+)	FALSE	FALSE	Bos taurus
FJ938064.1	Coronaviridae_4	Bovine coronavirus E-AH187-TC, complete genome	Coronaviridae	Betacoronavirus	Betacoronavirus 1		2000-01-01	USA	30995	ssRNA(+)	FALSE	FALSE	Bos taurus
FJ938065.1	Coronaviridae_4	Bovine respiratory coronavirus AH187, complete genome	Coronaviridae	Betacoronavirus	Betacoronavirus 1		2000-01-01	USA	30969	ssRNA(+)	FALSE	FALSE	Bos taurus
FJ938066.1	Coronaviridae_4	Bovine respiratory coronavirus bovine/US/OH-440-TC/1996, complete genome	Coronaviridae	Betacoronavirus	Betacoronavirus 1		1996-01-01	USA	30953	ssRNA(+)	FALSE	FALSE	Bos taurus
FJ938067.1	Coronaviridae_4	Human enteric coronavirus strain 4408, complete genome	Coronaviridae	Betacoronavirus	Betacoronavirus 1		2009-04-17		30953	ssRNA(+)	FALSE	FALSE	Homo sapiens
FN430415.1	Coronaviridae_6	Infectious bronchitis virus NGA/A116E7/2006, complete genome	Coronaviridae	Gammacoronavirus	Avian coronavirus		2006-06-01	Nigeria	27593	ssRNA(+)	FALSE	FALSE
GQ152141.1	Coronaviridae_5	Feline coronavirus strain FCoV/NTU156/P/2007, complete genome	Coronaviridae	Alphacoronavirus	Alphacoronavirus 1	lung	2007-09-15	Taiwan	28897	ssRNA(+)	FALSE	FALSE	Felis catus
GQ427173.1	Coronaviridae_6	Turkey coronavirus strain TCoV/VA-74/03, complete genome	Coronaviridae	Gammacoronavirus	Avian coronavirus		2003-06-01	USA	27770	ssRNA(+)	FALSE	FALSE	Meleagris gallopavo
GQ427174.1	Coronaviridae_6	Turkey coronavirus strain TCoV/TX-GL/01, complete genome	Coronaviridae	Gammacoronavirus	Avian coronavirus		2001-06-01	USA	27650	ssRNA(+)	FALSE	FALSE	Meleagris gallopavo
GQ427175.1	Coronaviridae_6	Turkey coronavirus strain TCoV/IN-517/94, complete genome	Coronaviridae	Gammacoronavirus	Avian coronavirus		1994-06-01	USA	27690	ssRNA(+)	FALSE	FALSE	Meleagris gallopavo
GQ427176.1	Coronaviridae_6	Turkey coronavirus strain TCoV/TX-1038/98, complete genome	Coronaviridae	Gammacoronavirus	Avian coronavirus		1998-06-01	USA	27804	ssRNA(+)	FALSE	FALSE	Meleagris gallopavo
GQ477367.1	Coronaviridae_5	Canine coronavirus strain CCoV/NTU336/F/2008, complete genome	Coronaviridae	Alphacoronavirus	Alphacoronavirus 1		2008-11-15	Taiwan	29363	ssRNA(+)	FALSE	FALSE	Canis lupus familiaris
GQ504720.1	Coronaviridae_6	Infectious bronchitis virus strain Arkansas DPI, complete genome	Coronaviridae	Gammacoronavirus	Avian coronavirus		1981-06-01	USA	27652	ssRNA(+)	FALSE	FALSE	Gallus gallus
GQ504721.2	Coronaviridae_6	Infectious bronchitis virus strain Arkansas Vaccine, complete genome	Coronaviridae	Gammacoronavirus	Avian coronavirus		1981-06-01	USA	27620	ssRNA(+)	FALSE	FALSE	Gallus gallus
GQ504722.1	Coronaviridae_6	Infectious bronchitis virus strain Georgia 1998 pass8, complete genome	Coronaviridae	Gammacoronavirus	Avian coronavirus		1998-06-01	USA	27648	ssRNA(+)	FALSE	FALSE	Gallus gallus
GQ504723.1	Coronaviridae_6	Infectious bronchitis virus strain Georgia 1998 Vaccine, complete genome	Coronaviridae	Gammacoronavirus	Avian coronavirus		1998-06-01	USA	27620	ssRNA(+)	FALSE	FALSE	Gallus gallus
GQ504724.1	Coronaviridae_6	Infectious bronchitis virus strain Massachusetts, complete genome	Coronaviridae	Gammacoronavirus	Avian coronavirus		1941-06-01	USA	27475	ssRNA(+)	FALSE	FALSE	Gallus gallus
GQ504725.1	Coronaviridae_6	Infectious bronchitis virus strain Mass41 Vaccine, complete genome	Coronaviridae	Gammacoronavirus	Avian coronavirus		1941-06-01	USA	27451	ssRNA(+)	FALSE	FALSE	Gallus gallus
GU190215.1	Coronaviridae_11	Bat coronavirus BM48-31/BGR/2008, complete genome	Coronaviridae	Betacoronavirus	Bat coronavirus BM48-31/BGR/2008		2008-06-01	Bulgaria	29276	ssRNA(+)	FALSE	FALSE	Rhinolophus blasii
GU393331.1	Coronaviridae_6	Infectious bronchitis virus serotype Cal56b, complete genome	Coronaviridae	Gammacoronavirus	Avian coronavirus		1991-06-01	USA	27663	ssRNA(+)	FALSE	FALSE	Gallus gallus
GU393332.1	Coronaviridae_6	Infectious bronchitis virus serotype Delaware 072, complete genome	Coronaviridae	Gammacoronavirus	Avian coronavirus		1992-06-01	USA	27591	ssRNA(+)	FALSE	FALSE	Gallus gallus
GU393333.1	Coronaviridae_6	Infectious bronchitis virus serotype FL18288, complete genome	Coronaviridae	Gammacoronavirus	Avian coronavirus		1971-06-01	USA	27616	ssRNA(+)	FALSE	FALSE	Gallus gallus
GU393334.1	Coronaviridae_6	Infectious bronchitis virus serotype Gray, complete genome	Coronaviridae	Gammacoronavirus	Avian coronavirus		1960-06-01	USA	27622	ssRNA(+)	FALSE	FALSE	Gallus gallus
GU393335.1	Coronaviridae_6	Infectious bronchitis virus serotype H120, complete genome	Coronaviridae	Gammacoronavirus	Avian coronavirus		1960-06-01	Netherlands	27632	ssRNA(+)	FALSE	FALSE	Gallus gallus
GU393336.1	Coronaviridae_6	Infectious bronchitis virus serotype Holte, complete genome	Coronaviridae	Gammacoronavirus	Avian coronavirus		1954-06-01	USA	27247	ssRNA(+)	FALSE	FALSE	Gallus gallus
GU393337.1	Coronaviridae_6	Infectious bronchitis virus serotype Iowa 97, complete genome	Coronaviridae	Gammacoronavirus	Avian coronavirus		1956-06-01	USA	27663	ssRNA(+)	FALSE	FALSE	Gallus gallus
GU393338.1	Coronaviridae_6	Infectious bronchitis virus serotype JMK, complete genome	Coronaviridae	Gammacoronavirus	Avian coronavirus		1964-06-01	USA	27515	ssRNA(+)	FALSE	FALSE	Gallus gallus
GU553361.1	Coronaviridae_10	Feline coronavirus UU22 isolate TCVSP-ROTTIER-00022, complete genome	Coronaviridae	Alphacoronavirus	Alphacoronavirus 1		2007-09-13	Netherlands	29264	ssRNA(+)	FALSE	FALSE	Feliformia
GU553362.1	Coronaviridae_10	Feline coronavirus UU23 isolate TCVSP-ROTTIER-00023, complete genome	Coronaviridae	Alphacoronavirus	Alphacoronavirus 1		2007-09-13	Netherlands	29264	ssRNA(+)	FALSE	FALSE	Feliformia
GU553363.1	Coronaviridae_3	SARS coronavirus HKU-39849 isolate TCVSP-HARROD-00001, complete genome	Coronaviridae	Betacoronavirus	Severe acute respiratory syndrome-related coronavirus		2003-06-07	China	29644	ssRNA(+)	FALSE	FALSE	Homo sapiens
GU553365.1	Coronaviridae_3	SARS coronavirus HKU-39849 isolate TCVSP-HARROD-00003, complete genome	Coronaviridae	Betacoronavirus	Severe acute respiratory syndrome-related coronavirus	lung	2007-12-05	USA	29644	ssRNA(+)	FALSE	FALSE	Chlorocebus aethiops
HG994852.1	Coronaviridae_12	Severe acute respiratory syndrome-related coronavirus isolate H_SC_01 genome assembly, complete genome: monopartite	Coronaviridae	Betacoronavirus	Severe acute respiratory syndrome-related coronavirus		2020-07-15	Italy	29900	ssRNA(+)	FALSE	FALSE	Homo sapiens
HG994855.1	Coronaviridae_12	Severe acute respiratory syndrome-related coronavirus isolate H_SC_06 genome assembly, complete genome: monopartite	Coronaviridae	Betacoronavirus	Severe acute respiratory syndrome-related coronavirus		2020-11-15	Italy	29903	ssRNA(+)	FALSE	FALSE	Homo sapiens
HM034837.1	Coronaviridae_13	Human coronavirus HKU1 isolate Caen1, complete genome	Coronaviridae	Betacoronavirus	Human coronavirus HKU1	oronasopharynx	2005-03-04	France	29862	ssRNA(+)	FALSE	FALSE	Homo sapiens
HM211098.1	Coronaviridae_14	Bat coronavirus HKU9-5-1, complete genome	Coronaviridae	Betacoronavirus	Rousettus bat coronavirus HKU9		2005-12-11	China	29136	ssRNA(+)	FALSE	FALSE	Chiroptera
HM211099.1	Coronaviridae_15	Bat coronavirus HKU9-5-2, complete genome	Coronaviridae	Betacoronavirus	Rousettus bat coronavirus HKU9		2005-12-11	China	29112	ssRNA(+)	FALSE	FALSE	Chiroptera
HM211100.1	Coronaviridae_14	Bat coronavirus HKU9-10-1, complete genome	Coronaviridae	Betacoronavirus	Rousettus bat coronavirus HKU9		2006-04-10	China	29136	ssRNA(+)	FALSE	FALSE	Chiroptera
HM211101.1	Coronaviridae_15	Bat coronavirus HKU9-10-2, complete genome	Coronaviridae	Betacoronavirus	Rousettus bat coronavirus HKU9		2006-04-10	China	29122	ssRNA(+)	FALSE	FALSE	Chiroptera
HM245923.1	Coronaviridae_6	Infectious bronchitis virus isolate DY07, complete genome	Coronaviridae	Gammacoronavirus	Avian coronavirus		2007-06-01	China	27675	ssRNA(+)	FALSE	FALSE	Gallus gallus
HM245924.1	Coronaviridae_6	Infectious bronchitis virus isolate CQ04-1, complete genome	Coronaviridae	Gammacoronavirus	Avian coronavirus		2004-06-01	China	27709	ssRNA(+)	FALSE	FALSE	Gallus gallus
HM245925.1	Coronaviridae_16	Mink coronavirus strain WD1127, complete genome	Coronaviridae	Alphacoronavirus	Mink coronavirus 1		1998-01-01	USA	28941	ssRNA(+)	FALSE	FALSE	Neogale vison
HM245926.1	Coronaviridae_16	Mink coronavirus strain WD1133, complete genome	Coronaviridae	Alphacoronavirus	Mink coronavirus strain WD1133		1998-01-01	USA	28915	ssRNA(+)	FALSE	FALSE	Neogale vison
HQ012367.1	Coronaviridae_10	Feline coronavirus UU17, complete genome	Coronaviridae	Alphacoronavirus	Alphacoronavirus 1		2007-07-17	Netherlands	29202	ssRNA(+)	FALSE	FALSE	Feliformia
HQ012368.1	Coronaviridae_10	Feline coronavirus UU18, complete genome	Coronaviridae	Alphacoronavirus	Alphacoronavirus 1		2007-07-24	Netherlands	29252	ssRNA(+)	FALSE	FALSE	Feliformia
HQ012369.1	Coronaviridae_10	Feline coronavirus UU21, complete genome	Coronaviridae	Alphacoronavirus	Alphacoronavirus 1		2007-09-11	Netherlands	28429	ssRNA(+)	FALSE	FALSE	Feliformia
HQ012370.1	Coronaviridae_10	Feline coronavirus UU24, complete genome	Coronaviridae	Alphacoronavirus	Alphacoronavirus 1		2008-01-03	Netherlands	29266	ssRNA(+)	FALSE	FALSE	Feliformia
HQ012371.1	Coronaviridae_10	Feline coronavirus UU31, complete genome	Coronaviridae	Alphacoronavirus	Alphacoronavirus 1		2008-01-25	Netherlands	29274	ssRNA(+)	FALSE	FALSE	Feliformia
HQ012372.1	Coronaviridae_10	Feline coronavirus UU34, complete genome	Coronaviridae	Alphacoronavirus	Alphacoronavirus 1		2007-09-11	Netherlands	29216	ssRNA(+)	FALSE	FALSE	Felis catus
HQ392469.1	Coronaviridae_10	Feline coronavirus UU40, complete genome	Coronaviridae	Alphacoronavirus	Alphacoronavirus 1		2008-01-22	Netherlands	29233	ssRNA(+)	FALSE	FALSE	Felis catus
HQ392470.1	Coronaviridae_10	Feline coronavirus UU19, complete genome	Coronaviridae	Alphacoronavirus	Alphacoronavirus 1		2007-08-23	Netherlands	29255	ssRNA(+)	FALSE	FALSE	Feliformia
HQ392471.1	Coronaviridae_10	Feline coronavirus UU20, complete genome	Coronaviridae	Alphacoronavirus	Alphacoronavirus 1		2007-08-23	Netherlands	29252	ssRNA(+)	FALSE	FALSE	Feliformia
HQ392472.1	Coronaviridae_10	Feline coronavirus UU30, complete genome	Coronaviridae	Alphacoronavirus	Alphacoronavirus 1		2008-01-22	Netherlands	29233	ssRNA(+)	FALSE	FALSE	Feliformia
HQ848267.1	Coronaviridae_6	Infectious bronchitis virus isolate GX-YL5, complete genome	Coronaviridae	Gammacoronavirus	Avian coronavirus	embryo	2005-08-15	China	27720	ssRNA(+)	FALSE	FALSE	Gallus gallus
HQ850618.1	Coronaviridae_6	Infectious bronchitis virus isolate GX-YL9, complete genome	Coronaviridae	Gammacoronavirus	Avian coronavirus	embryo	2007-08-25	China	27597	ssRNA(+)	FALSE	FALSE	Gallus gallus
HQ890526.1	Coronaviridae_3	SARS coronavirus MA15 ExoN1 isolate d2ym1, complete genome	Coronaviridae	Betacoronavirus	Severe acute respiratory syndrome-related coronavirus		2008-10-08	USA	29646	ssRNA(+)	FALSE	FALSE	Mus musculus
HQ890527.1	Coronaviridae_3	SARS coronavirus MA15 ExoN1 isolate d2ym2, complete genome	Coronaviridae	Betacoronavirus	Severe acute respiratory syndrome-related coronavirus		2008-10-08	USA	29646	ssRNA(+)	FALSE	FALSE	Mus musculus
HQ890528.1	Coronaviridae_3	SARS coronavirus MA15 ExoN1 isolate d2ym3, complete genome	Coronaviridae	Betacoronavirus	Severe acute respiratory syndrome-related coronavirus		2008-10-08	USA	29646	ssRNA(+)	FALSE	FALSE	Mus musculus
HQ890529.1	Coronaviridae_3	SARS coronavirus MA15 ExoN1 isolate d2ym4, complete genome	Coronaviridae	Betacoronavirus	Severe acute respiratory syndrome-related coronavirus		2008-10-08	USA	29646	ssRNA(+)	FALSE	FALSE	Mus musculus
HQ890530.1	Coronaviridae_3	SARS coronavirus MA15 ExoN1 isolate d2ym5, complete genome	Coronaviridae	Betacoronavirus	Severe acute respiratory syndrome-related coronavirus		2008-10-08	USA	29646	ssRNA(+)	FALSE	FALSE	Mus musculus
HQ890531.1	Coronaviridae_3	SARS coronavirus MA15 ExoN1 isolate d4ym1, complete genome	Coronaviridae	Betacoronavirus	Severe acute respiratory syndrome-related coronavirus		2008-10-10	USA	29645	ssRNA(+)	FALSE	FALSE	Mus musculus
HQ890532.1	Coronaviridae_3	SARS coronavirus MA15 ExoN1 isolate d4ym2, complete genome	Coronaviridae	Betacoronavirus	Severe acute respiratory syndrome-related coronavirus		2008-10-10	USA	29645	ssRNA(+)	FALSE	FALSE	Mus musculus
HQ890533.1	Coronaviridae_3	SARS coronavirus MA15 ExoN1 isolate d4ym3, complete genome	Coronaviridae	Betacoronavirus	Severe acute respiratory syndrome-related coronavirus		2008-10-10	USA	29646	ssRNA(+)	FALSE	FALSE	Mus musculus
HQ890534.1	Coronaviridae_3	SARS coronavirus MA15 ExoN1 isolate d2om1, complete genome	Coronaviridae	Betacoronavirus	Severe acute respiratory syndrome-related coronavirus		2008-09-17	USA	29646	ssRNA(+)	FALSE	FALSE	Mus musculus
HQ890535.1	Coronaviridae_3	SARS coronavirus MA15 ExoN1 isolate d2om2, complete genome	Coronaviridae	Betacoronavirus	Severe acute respiratory syndrome-related coronavirus		2008-09-17	USA	29646	ssRNA(+)	FALSE	FALSE	Mus musculus
HQ890536.1	Coronaviridae_3	SARS coronavirus MA15 ExoN1 isolate d2om3, complete genome	Coronaviridae	Betacoronavirus	Severe acute respiratory syndrome-related coronavirus		2008-09-17	USA	29646	ssRNA(+)	FALSE	FALSE	Mus musculus
HQ890537.1	Coronaviridae_3	SARS coronavirus MA15 ExoN1 isolate d2om4, complete genome	Coronaviridae	Betacoronavirus	Severe acute respiratory syndrome-related coronavirus		2008-09-17	USA	29646	ssRNA(+)	FALSE	FALSE	Mus musculus
HQ890538.1	Coronaviridae_3	SARS coronavirus MA15 ExoN1 isolate d2om5, complete genome	Coronaviridae	Betacoronavirus	Severe acute respiratory syndrome-related coronavirus		2008-09-17	USA	29646	ssRNA(+)	FALSE	FALSE	Mus musculus
HQ890539.1	Coronaviridae_3	SARS coronavirus MA15 ExoN1 isolate d3om1, complete genome	Coronaviridae	Betacoronavirus	Severe acute respiratory syndrome-related coronavirus		2008-09-18	USA	29646	ssRNA(+)	FALSE	FALSE	Mus musculus
HQ890540.1	Coronaviridae_3	SARS coronavirus MA15 ExoN1 isolate d3om2, complete genome	Coronaviridae	Betacoronavirus	Severe acute respiratory syndrome-related coronavirus		2008-09-18	USA	29646	ssRNA(+)	FALSE	FALSE	Mus musculus
HQ890541.1	Coronaviridae_3	SARS coronavirus MA15 isolate d2ym1, complete genome	Coronaviridae	Betacoronavirus	Severe acute respiratory syndrome-related coronavirus		2008-10-08	USA	29646	ssRNA(+)	FALSE	FALSE	Mus musculus
HQ890542.1	Coronaviridae_3	SARS coronavirus MA15 isolate d2om1, complete genome	Coronaviridae	Betacoronavirus	Severe acute respiratory syndrome-related coronavirus		2008-09-17	USA	29646	ssRNA(+)	FALSE	FALSE	Mus musculus
HQ890543.1	Coronaviridae_3	SARS coronavirus MA15 isolate d2om2, complete genome	Coronaviridae	Betacoronavirus	Severe acute respiratory syndrome-related coronavirus		2008-09-17	USA	29646	ssRNA(+)	FALSE	FALSE	Mus musculus
HQ890544.1	Coronaviridae_3	SARS coronavirus MA15 isolate d2om3, complete genome	Coronaviridae	Betacoronavirus	Severe acute respiratory syndrome-related coronavirus		2008-09-17	USA	29646	ssRNA(+)	FALSE	FALSE	Mus musculus
HQ890545.1	Coronaviridae_3	SARS coronavirus MA15 isolate d2om4, complete genome	Coronaviridae	Betacoronavirus	Severe acute respiratory syndrome-related coronavirus		2008-09-17	USA	29646	ssRNA(+)	FALSE	FALSE	Mus musculus
HQ890546.1	Coronaviridae_3	SARS coronavirus MA15 isolate d2om5, complete genome	Coronaviridae	Betacoronavirus	Severe acute respiratory syndrome-related coronavirus		2008-09-17	USA	29646	ssRNA(+)	FALSE	FALSE	Mus musculus
JF274479.2	Coronaviridae_6	Infectious bronchitis virus strain ck/CH/LHLJ/07VII, complete genome	Coronaviridae	Gammacoronavirus	Avian coronavirus		2007-05-07	China	27678	ssRNA(+)	FALSE	FALSE	Gallus gallus
JF292902.1	Coronaviridae_3	SARS coronavirus MA15 ExoN1 isolate d4ym4, complete genome	Coronaviridae	Betacoronavirus	Severe acute respiratory syndrome-related coronavirus		2008-10-10	USA	29646	ssRNA(+)	FALSE	FALSE	Mus musculus
JF292903.1	Coronaviridae_3	SARS coronavirus MA15 ExoN1 isolate d4ym5, complete genome	Coronaviridae	Betacoronavirus	Severe acute respiratory syndrome-related coronavirus		2008-10-10	USA	29645	ssRNA(+)	FALSE	FALSE	Mus musculus
JF292904.1	Coronaviridae_3	SARS coronavirus MA15 ExoN1 isolate d3om3, complete genome	Coronaviridae	Betacoronavirus	Severe acute respiratory syndrome-related coronavirus		2008-09-18	USA	29645	ssRNA(+)	FALSE	FALSE	Mus musculus
JF292905.1	Coronaviridae_3	SARS coronavirus MA15 ExoN1 isolate d3om4, complete genome	Coronaviridae	Betacoronavirus	Severe acute respiratory syndrome-related coronavirus		2008-09-18	USA	29646	ssRNA(+)	FALSE	FALSE	Mus musculus
JF292906.1	Coronaviridae_3	SARS coronavirus MA15 ExoN1 isolate d3om5, complete genome	Coronaviridae	Betacoronavirus	Severe acute respiratory syndrome-related coronavirus		2008-09-18	USA	29646	ssRNA(+)	FALSE	FALSE	Mus musculus
JF292907.1	Coronaviridae_3	SARS coronavirus MA15 isolate d2ym2, complete genome	Coronaviridae	Betacoronavirus	Severe acute respiratory syndrome-related coronavirus		2008-08-10	USA	29646	ssRNA(+)	FALSE	FALSE	Mus musculus
JF292908.1	Coronaviridae_3	SARS coronavirus MA15 isolate d2ym3, complete genome	Coronaviridae	Betacoronavirus	Severe acute respiratory syndrome-related coronavirus		2008-08-10	USA	29646	ssRNA(+)	FALSE	FALSE	Mus musculus
JF292909.1	Coronaviridae_3	SARS coronavirus MA15 isolate d2ym4, complete genome	Coronaviridae	Betacoronavirus	Severe acute respiratory syndrome-related coronavirus		2008-08-10	USA	29646	ssRNA(+)	FALSE	FALSE	Mus musculus
JF292910.1	Coronaviridae_3	SARS coronavirus MA15 isolate d2ym5, complete genome	Coronaviridae	Betacoronavirus	Severe acute respiratory syndrome-related coronavirus		2008-08-10	USA	29646	ssRNA(+)	FALSE	FALSE	Mus musculus
JF292911.1	Coronaviridae_3	SARS coronavirus MA15 isolate d4ym1, complete genome	Coronaviridae	Betacoronavirus	Severe acute respiratory syndrome-related coronavirus		2008-10-10	USA	29646	ssRNA(+)	FALSE	FALSE	Mus musculus
JF292912.1	Coronaviridae_3	SARS coronavirus MA15 isolate d4ym2, complete genome	Coronaviridae	Betacoronavirus	Severe acute respiratory syndrome-related coronavirus		2008-10-10	USA	29646	ssRNA(+)	FALSE	FALSE	Mus musculus
JF292913.1	Coronaviridae_3	SARS coronavirus MA15 isolate d4ym3, complete genome	Coronaviridae	Betacoronavirus	Severe acute respiratory syndrome-related coronavirus		2008-10-10	USA	29646	ssRNA(+)	FALSE	FALSE	Mus musculus
JF292914.1	Coronaviridae_3	SARS coronavirus MA15 isolate d4ym4, complete genome	Coronaviridae	Betacoronavirus	Severe acute respiratory syndrome-related coronavirus		2008-10-10	USA	29646	ssRNA(+)	FALSE	FALSE	Mus musculus
JF292915.1	Coronaviridae_3	SARS coronavirus MA15 isolate d4ym5, complete genome	Coronaviridae	Betacoronavirus	Severe acute respiratory syndrome-related coronavirus		2008-10-10	USA	29646	ssRNA(+)	FALSE	FALSE	Mus musculus
JF292916.1	Coronaviridae_3	SARS coronavirus MA15 isolate d3om1, complete genome	Coronaviridae	Betacoronavirus	Severe acute respiratory syndrome-related coronavirus		2008-09-19	USA	29646	ssRNA(+)	FALSE	FALSE	Mus musculus
JF292917.1	Coronaviridae_3	SARS coronavirus MA15 isolate d3om2, complete genome	Coronaviridae	Betacoronavirus	Severe acute respiratory syndrome-related coronavirus		2008-09-19	USA	29646	ssRNA(+)	FALSE	FALSE	Mus musculus
JF292918.1	Coronaviridae_3	SARS coronavirus MA15 isolate d3om3, complete genome	Coronaviridae	Betacoronavirus	Severe acute respiratory syndrome-related coronavirus		2008-09-19	USA	29646	ssRNA(+)	FALSE	FALSE	Mus musculus
JF292919.1	Coronaviridae_3	SARS coronavirus MA15 isolate d3om4, complete genome	Coronaviridae	Betacoronavirus	Severe acute respiratory syndrome-related coronavirus		2008-09-19	USA	29646	ssRNA(+)	FALSE	FALSE	Mus musculus
JF292920.1	Coronaviridae_3	SARS coronavirus MA15 isolate d3om5, complete genome	Coronaviridae	Betacoronavirus	Severe acute respiratory syndrome-related coronavirus		2008-09-19	USA	29646	ssRNA(+)	FALSE	FALSE	Mus musculus
JF292921.1	Coronaviridae_3	SARS coronavirus wtic-MB isolate c1P1, complete genome	Coronaviridae	Betacoronavirus	Severe acute respiratory syndrome-related coronavirus		2009-03-18	USA	29646	ssRNA(+)	FALSE	FALSE
JF292922.1	Coronaviridae_3	SARS coronavirus ExoN1 isolate c5P1, complete genome	Coronaviridae	Betacoronavirus	Severe acute respiratory syndrome-related coronavirus		2009-03-18	USA	29647	ssRNA(+)	FALSE	FALSE
JF330898.1	Coronaviridae_6	Infectious bronchitis virus strain ck/CH/LHB/100801, complete genome	Coronaviridae	Gammacoronavirus	Avian coronavirus		2010-06-01	China	27675	ssRNA(+)	FALSE	FALSE	Gallus gallus
JF330899.1	Coronaviridae_6	Infectious bronchitis virus strain ck/CH/LNM/091017, complete genome	Coronaviridae	Gammacoronavirus	Avian coronavirus		2009-06-01	China	27631	ssRNA(+)	FALSE	FALSE	Gallus gallus
JF732903.1	Coronaviridae_6	Infectious bronchitis virus strain Sczy3, complete genome	Coronaviridae	Gammacoronavirus	Avian coronavirus	kidney, abdominal cavity	2009-04-15	China	27695	ssRNA(+)	FALSE	FALSE	Gallus gallus
JF828980.1	Coronaviridae_6	Infectious bronchitis virus strain ck/CH/LHLJ/100902, complete genome	Coronaviridae	Gammacoronavirus	Avian coronavirus		2010-06-01	China	27485	ssRNA(+)	FALSE	FALSE	Gallus gallus
JF828981.1	Coronaviridae_6	Infectious bronchitis virus strain ck/CH/LDL/101212, complete genome	Coronaviridae	Gammacoronavirus	Avian coronavirus		2010-06-01	China	27641	ssRNA(+)	FALSE	FALSE	Gallus gallus
JF893452.2	Coronaviridae_6	Infectious bronchitis virus isolate YN, complete genome	Coronaviridae	Gammacoronavirus	Avian coronavirus		2005-06-01	China	27681	ssRNA(+)	FALSE	FALSE	Gallus gallus
JN129834.1	Coronaviridae_4	Human coronavirus OC43 strain HK04-01, complete genome	Coronaviridae	Betacoronavirus	Betacoronavirus 1		2004-11-15	China	30710	ssRNA(+)	FALSE	FALSE	Homo sapiens
JN183882.1	Coronaviridae_10	Feline coronavirus UU47, complete genome	Coronaviridae	Alphacoronavirus	Alphacoronavirus 1		2010-07-14	Netherlands	29243	ssRNA(+)	FALSE	FALSE	Felis catus
JN183883.1	Coronaviridae_10	Feline coronavirus UU54, complete genome	Coronaviridae	Alphacoronavirus	Alphacoronavirus 1		2010-03-12	Netherlands	29222	ssRNA(+)	FALSE	FALSE	Felis catus
JN547228.1	Coronaviridae_17	Porcine epidemic diarrhea virus strain CH/S, complete genome	Coronaviridae	Alphacoronavirus	Porcine epidemic diarrhea virus	abdominal cavity	1986-06-01	China	28026	ssRNA(+)	FALSE	FALSE	Sus scrofa
JN825712.1	Coronaviridae_17	Porcine epidemic diarrhea virus isolate BJ-2011-1, complete genome	Coronaviridae	Alphacoronavirus	Porcine epidemic diarrhea virus	feces	2011-04-25	China	28038	ssRNA(+)	FALSE	FALSE	Sus scrofa
JN854286.1	Coronaviridae_3	SARS coronavirus HKU-39849 isolate recSARS-CoV HKU-39849, complete genome	Coronaviridae	Betacoronavirus	Severe acute respiratory syndrome-related coronavirus		2003-04-16	United Kingdom	29727	ssRNA(+)	FALSE	FALSE
JN856008.2	Coronaviridae_5	Canine coronavirus strain A76, complete genome	Coronaviridae	Alphacoronavirus	Alphacoronavirus 1		1976-06-01	USA	29271	ssRNA(+)	FALSE	FALSE	Canis lupus familiaris
JN874559.1	Coronaviridae_4	Rabbit coronavirus HKU14 strain HKU14-1, complete genome	Coronaviridae	Betacoronavirus	Rabbit coronavirus HKU14		2006-06-01	China	31100	ssRNA(+)	FALSE	FALSE	Oryctolagus cuniculus
JN874560.1	Coronaviridae_4	Rabbit coronavirus HKU14 strain HKU14-3, complete genome	Coronaviridae	Betacoronavirus	Rabbit coronavirus HKU14		2007-06-01	China	31116	ssRNA(+)	FALSE	FALSE	Oryctolagus cuniculus
JN874561.1	Coronaviridae_4	Rabbit coronavirus HKU14 strain HKU14-8, complete genome	Coronaviridae	Betacoronavirus	Rabbit coronavirus HKU14		2007-06-01	China	31096	ssRNA(+)	FALSE	FALSE	Oryctolagus cuniculus
JN874562.1	Coronaviridae_4	Rabbit coronavirus HKU14 strain HKU14-10, complete genome	Coronaviridae	Betacoronavirus	Rabbit coronavirus HKU14		2007-06-01	China	30904	ssRNA(+)	FALSE	FALSE	Oryctolagus cuniculus
JQ023161.1	Coronaviridae_17	Porcine epidemic diarrhea virus strain virulent DR13, complete genome	Coronaviridae	Alphacoronavirus	Porcine epidemic diarrhea virus		2009-06-01	South Korea	28029	ssRNA(+)	FALSE	FALSE	Sus scrofa
JQ065042.2	Coronaviridae_18	Porcine coronavirus HKU15 strain HKU15-44, complete genome	Coronaviridae	Deltacoronavirus	Coronavirus HKU15		2009-06-01	China	25430	ssRNA(+)	FALSE	FALSE	Sus scrofa
JQ065043.2	Coronaviridae_18	Porcine coronavirus HKU15 strain HKU15-155, complete genome	Coronaviridae	Deltacoronavirus	Coronavirus HKU15		2010-06-01	China	25425	ssRNA(+)	FALSE	FALSE	Sus scrofa
JQ065044.1	Coronaviridae_19	White-eye coronavirus HKU16 strain HKU16-6847, complete genome	Coronaviridae	Deltacoronavirus	White-eye coronavirus HKU16		2007-06-01	China	26041	ssRNA(+)	FALSE	FALSE	Zosteropidae
JQ065045.1	Coronaviridae_18	Sparrow coronavirus HKU17 strain HKU17-6124, complete genome	Coronaviridae	Deltacoronavirus	Sparrow coronavirus HKU17		2007-06-01	China	26083	ssRNA(+)	FALSE	FALSE	Passeridae
JQ065046.1	Coronaviridae_20	Magpie-robin coronavirus HKU18 strain HKU18-chu3, complete genome	Coronaviridae	Deltacoronavirus	Magpie-robin coronavirus HKU18		2007-06-01	China	26689	ssRNA(+)	FALSE	FALSE	Muscicapidae
JQ065047.1	Coronaviridae_21	Night-heron coronavirus HKU19 strain HKU19-6918, complete genome	Coronaviridae	Deltacoronavirus	Night heron coronavirus HKU19		2007-06-01	China	26077	ssRNA(+)	FALSE	FALSE	Ardeidae
JQ065048.1	Coronaviridae_22	Wigeon coronavirus HKU20 strain HKU20-9243, complete genome	Coronaviridae	Deltacoronavirus	Wigeon coronavirus HKU20		2008-06-01	China	26227	ssRNA(+)	FALSE	FALSE	Mareca
JQ065049.1	Coronaviridae_23	Common-moorhen coronavirus HKU21 strain HKU21-8295, complete genome	Coronaviridae	Deltacoronavirus	Common moorhen coronavirus HKU21		2007-06-01	China	26223	ssRNA(+)	FALSE	FALSE	Gallinula chloropus
JQ088078.1	Coronaviridae_6	Infectious bronchitis virus strain CK/SWE/0658946/10, complete genome	Coronaviridae	Gammacoronavirus	Avian coronavirus	allantoic fluid	2010-06-01	Sweden	27664	ssRNA(+)	FALSE	FALSE	Gallus gallus
JQ282909.1	Coronaviridae_17	Porcine epidemic diarrhea virus strain CH/FJND-3/2011, complete genome	Coronaviridae	Alphacoronavirus	Porcine epidemic diarrhea virus		2011-05-03	China	28038	ssRNA(+)	FALSE	FALSE	Sus scrofa
JQ410000.1	Coronaviridae_2	Alpaca respiratory coronavirus isolate CA08-1/2008, complete genome	Coronaviridae	Alphacoronavirus	Human coronavirus 229E		2008-06-01	USA	27374	ssRNA(+)	FALSE	FALSE	Vicugna pacos
JQ765563.1	Coronaviridae_24	Human coronavirus NL63 strain NL63/DEN/2009/9, complete genome	Coronaviridae	Alphacoronavirus	Human coronavirus NL63	oronasopharynx	2009-03-16	USA	27469	ssRNA(+)	FALSE	FALSE	Homo sapiens
JQ765564.1	Coronaviridae_24	Human coronavirus NL63 strain NL63/DEN/2009/14, complete genome	Coronaviridae	Alphacoronavirus	Human coronavirus NL63	oronasopharynx	2009-03-01	USA	27469	ssRNA(+)	FALSE	FALSE	Homo sapiens
JQ765565.1	Coronaviridae_24	Human coronavirus NL63 strain NL63/DEN/2009/15, complete genome	Coronaviridae	Alphacoronavirus	Human coronavirus NL63	oronasopharynx	2009-02-13	USA	27469	ssRNA(+)	FALSE	FALSE	Homo sapiens
JQ765566.1	Coronaviridae_24	Human coronavirus NL63 strain NL63/DEN/2008/16, complete genome	Coronaviridae	Alphacoronavirus	Human coronavirus NL63	oronasopharynx	2008-01-08	USA	27487	ssRNA(+)	FALSE	FALSE	Homo sapiens
JQ765567.1	Coronaviridae_24	Human coronavirus NL63 strain NL63/DEN/2009/20, complete genome	Coronaviridae	Alphacoronavirus	Human coronavirus NL63	oronasopharynx	2009-03-12	USA	27487	ssRNA(+)	FALSE	FALSE	Homo sapiens
JQ765568.1	Coronaviridae_24	Human coronavirus NL63 strain NL63/DEN/2005/193, complete genome	Coronaviridae	Alphacoronavirus	Human coronavirus NL63	oronasopharynx	2005-01-11	USA	27487	ssRNA(+)	FALSE	FALSE	Homo sapiens
JQ765569.1	Coronaviridae_24	Human coronavirus NL63 strain NL63/DEN/2005/232, complete genome	Coronaviridae	Alphacoronavirus	Human coronavirus NL63	oronasopharynx	2005-01-18	USA	27469	ssRNA(+)	FALSE	FALSE	Homo sapiens
JQ765570.1	Coronaviridae_24	Human coronavirus NL63 strain NL63/DEN/2005/235, complete genome	Coronaviridae	Alphacoronavirus	Human coronavirus NL63	oronasopharynx	2005-01-19	USA	27469	ssRNA(+)	FALSE	FALSE	Homo sapiens
JQ765571.1	Coronaviridae_24	Human coronavirus NL63 strain NL63/DEN/2005/271, complete genome	Coronaviridae	Alphacoronavirus	Human coronavirus NL63	oronasopharynx	2005-01-23	USA	27487	ssRNA(+)	FALSE	FALSE	Homo sapiens
JQ765572.1	Coronaviridae_24	Human coronavirus NL63 strain NL63/DEN/2005/347, complete genome	Coronaviridae	Alphacoronavirus	Human coronavirus NL63	oronasopharynx	2005-02-01	USA	27487	ssRNA(+)	FALSE	FALSE	Homo sapiens
JQ765573.1	Coronaviridae_24	Human coronavirus NL63 strain NL63/DEN/2005/1062, complete genome	Coronaviridae	Alphacoronavirus	Human coronavirus NL63	oronasopharynx	2005-04-12	USA	27487	ssRNA(+)	FALSE	FALSE	Homo sapiens
JQ765574.1	Coronaviridae_24	Human coronavirus NL63 strain NL63/DEN/2005/1862, complete genome	Coronaviridae	Alphacoronavirus	Human coronavirus NL63	oronasopharynx	2005-11-15	USA	27487	ssRNA(+)	FALSE	FALSE	Homo sapiens
JQ765575.1	Coronaviridae_24	Human coronavirus NL63 strain NL63/DEN/2005/1876, complete genome	Coronaviridae	Alphacoronavirus	Human coronavirus NL63	oronasopharynx	2005-11-21	USA	27487	ssRNA(+)	FALSE	FALSE	Homo sapiens
JQ900255.1	Coronaviridae_24	UNVERIFIED: Human coronavirus NL63 strain NL63/DEN/2009/6 genomic sequence	Coronaviridae	Alphacoronavirus	Human coronavirus NL63	oronasopharynx	2009-02-25	USA	27485	ssRNA(+)	FALSE	FALSE	Homo sapiens
JQ900256.1	Coronaviridae_24	UNVERIFIED: Human coronavirus NL63 strain NL63/DEN/2009/22 genomic sequence	Coronaviridae	Alphacoronavirus	Human coronavirus NL63	oronasopharynx	2009-03-03	USA	27455	ssRNA(+)	FALSE	FALSE	Homo sapiens
JQ900257.1	Coronaviridae_24	UNVERIFIED: Human coronavirus NL63 strain NL63/DEN/2009/31 genomic sequence	Coronaviridae	Alphacoronavirus	Human coronavirus NL63	oronasopharynx	2009-02-21	USA	27456	ssRNA(+)	FALSE	FALSE	Homo sapiens
JQ900259.1	Coronaviridae_24	UNVERIFIED: Human coronavirus NL63 strain NL63/DEN/2005/449 genomic sequence	Coronaviridae	Alphacoronavirus	Human coronavirus NL63	oronasopharynx	2005-02-09	USA	27502	ssRNA(+)	FALSE	FALSE	Homo sapiens
JQ900260.1	Coronaviridae_24	UNVERIFIED: Human coronavirus NL63 strain NL63/DEN/2005/1120 genomic sequence	Coronaviridae	Alphacoronavirus	Human coronavirus NL63	oronasopharynx	2005-04-25	USA	27459	ssRNA(+)	FALSE	FALSE	Homo sapiens
JQ977697.1	Coronaviridae_6	Infectious bronchitis virus isolate SNU8067, complete genome	Coronaviridae	Gammacoronavirus	Avian coronavirus		2008-06-01	South Korea	27708	ssRNA(+)	FALSE	FALSE	Gallus gallus
JQ977698.1	Coronaviridae_6	Infectious bronchitis virus isolate KM91, complete genome	Coronaviridae	Gammacoronavirus	Avian coronavirus		1991-06-01	South Korea	27622	ssRNA(+)	FALSE	FALSE	Gallus gallus
JQ989266.1	Coronaviridae_25	Hipposideros bat coronavirus HKU10 isolate TT3A, complete genome	Coronaviridae	Alphacoronavirus	Bat coronavirus HKU10		2006-12-15	Hong Kong	28483	ssRNA(+)	FALSE	FALSE	Chiroptera
JQ989267.1	Coronaviridae_25	Hipposideros bat coronavirus HKU10 isolate SL12A, complete genome	Coronaviridae	Alphacoronavirus	Bat coronavirus HKU10		2006-12-15	Hong Kong	28483	ssRNA(+)	FALSE	FALSE	Chiroptera
JQ989268.1	Coronaviridae_25	Hipposideros bat coronavirus HKU10 isolate TLC1310A, complete genome	Coronaviridae	Alphacoronavirus	Bat coronavirus HKU10		2006-10-15	Hong Kong	28483	ssRNA(+)	FALSE	FALSE	Chiroptera
JQ989269.1	Coronaviridae_25	Hipposideros bat coronavirus HKU10 isolate LSH5A, complete genome	Coronaviridae	Alphacoronavirus	Bat coronavirus HKU10		2005-12-15	Hong Kong	28492	ssRNA(+)	FALSE	FALSE	Chiroptera
JQ989270.1	Coronaviridae_25	Rousettus bat coronavirus HKU10 isolate 183A, complete genome	Coronaviridae	Alphacoronavirus	Bat coronavirus HKU10		2005-10-15	China	28494	ssRNA(+)	FALSE	FALSE	Chiroptera
JQ989271.1	Coronaviridae_25	Rousettus bat coronavirus HKU10 isolate 175A, complete genome	Coronaviridae	Alphacoronavirus	Bat coronavirus HKU10		2005-10-15	China	28489	ssRNA(+)	FALSE	FALSE	Chiroptera
JQ989272.1	Coronaviridae_25	Hipposideros bat coronavirus HKU10 isolate TLC1343A, complete genome	Coronaviridae	Alphacoronavirus	Bat coronavirus HKU10		2010-08-15	Hong Kong	28483	ssRNA(+)	FALSE	FALSE	Chiroptera
JQ989273.1	Coronaviridae_25	Hipposideros bat coronavirus HKU10 isolate TLC1347A, complete genome	Coronaviridae	Alphacoronavirus	Bat coronavirus HKU10		2010-08-15	Hong Kong	28483	ssRNA(+)	FALSE	FALSE	Chiroptera
JX088695.1	Coronaviridae_17	Porcine epidemic diarrhea virus strain GD-B, complete genome	Coronaviridae	Alphacoronavirus	Porcine epidemic diarrhea virus	abdominal cavity	2012-06-01	China	28038	ssRNA(+)	FALSE	FALSE	Sus scrofa
JX104161.1	Coronaviridae_24	Human coronavirus NL63 isolate CBJ 037, complete genome	Coronaviridae	Alphacoronavirus	Human coronavirus NL63	oronasopharynx	2008-11-04	China	27538	ssRNA(+)	FALSE	FALSE	Homo sapiens
JX112709.1	Coronaviridae_17	Porcine epidemic diarrhea virus strain GD-A, complete genome	Coronaviridae	Alphacoronavirus	Porcine epidemic diarrhea virus		2012-02-11	China	28035	ssRNA(+)	FALSE	FALSE	Sus scrofa
JX163923.1	Coronaviridae_3	SARS coronavirus Tor2 isolate Tor2/FP1-10912, complete genome	Coronaviridae	Betacoronavirus	Severe acute respiratory syndrome-related coronavirus		2010-02-10	USA	29646	ssRNA(+)	FALSE	FALSE
JX163924.1	Coronaviridae_3	SARS coronavirus Tor2 isolate Tor2/FP1-10851, complete genome	Coronaviridae	Betacoronavirus	Severe acute respiratory syndrome-related coronavirus		2010-02-05	USA	29646	ssRNA(+)	FALSE	FALSE
JX163925.1	Coronaviridae_3	SARS coronavirus Tor2 isolate Tor2/FP1-10895, complete genome	Coronaviridae	Betacoronavirus	Severe acute respiratory syndrome-related coronavirus		2010-02-05	USA	29646	ssRNA(+)	FALSE	FALSE
JX163926.1	Coronaviridae_3	SARS coronavirus Tor2 isolate Tor2/FP1-10912, complete genome	Coronaviridae	Betacoronavirus	Severe acute respiratory syndrome-related coronavirus		2010-02-10	USA	29646	ssRNA(+)	FALSE	FALSE
JX163927.1	Coronaviridae_3	SARS coronavirus Tor2 isolate Tor2/FP1-10851, complete genome	Coronaviridae	Betacoronavirus	Severe acute respiratory syndrome-related coronavirus		2010-02-05	USA	29646	ssRNA(+)	FALSE	FALSE
JX163928.1	Coronaviridae_3	SARS coronavirus Tor2 isolate Tor2/FP1-10895, complete genome	Coronaviridae	Betacoronavirus	Severe acute respiratory syndrome-related coronavirus		2010-02-05	USA	29646	ssRNA(+)	FALSE	FALSE
JX169866.1	Coronaviridae_1	Murine coronavirus strain JHM-WU-Dns2, complete genome	Coronaviridae	Betacoronavirus	Murine coronavirus		1947-08-14	USA	30729	ssRNA(+)	FALSE	FALSE
JX169867.1	Coronaviridae_1	Murine coronavirus strain JHM.WU, complete genome	Coronaviridae	Betacoronavirus	Murine coronavirus		1947-08-14	USA	31051	ssRNA(+)	FALSE	FALSE
JX188454.1	Coronaviridae_17	Porcine epidemic diarrhea virus strain AJ1102, complete genome	Coronaviridae	Alphacoronavirus	Porcine epidemic diarrhea virus	feces	2011-05-15	China	28044	ssRNA(+)	FALSE	FALSE	Sus scrofa
JX195176.1	Coronaviridae_6	Infectious bronchitis virus strain ck/CH/LZJ/111113, complete genome	Coronaviridae	Gammacoronavirus	Avian coronavirus		2011-11-03	China	27683	ssRNA(+)	FALSE	FALSE	Gallus gallus
JX195177.1	Coronaviridae_6	Infectious bronchitis virus strain ck/CH/LDL/97I substrain P5, complete genome	Coronaviridae	Gammacoronavirus	Avian coronavirus		1997-06-01	China	27692	ssRNA(+)	FALSE	FALSE	Gallus gallus
JX195178.1	Coronaviridae_6	Infectious bronchitis virus strain ck/CH/LDL/97I substrain P115, complete genome	Coronaviridae	Gammacoronavirus	Avian coronavirus		2001-06-01	China	27693	ssRNA(+)	FALSE	FALSE	Gallus gallus
JX261936.1	Coronaviridae_17	Porcine epidemic diarrhea virus strain CHGD-01, complete genome	Coronaviridae	Alphacoronavirus	Porcine epidemic diarrhea virus		2011-02-10	China	28047	ssRNA(+)	FALSE	FALSE	Sus scrofa
JX489155.1	Coronaviridae_17	Porcine epidemic diarrhea virus strain LC, complete genome	Coronaviridae	Alphacoronavirus	Porcine epidemic diarrhea virus		2011-02-15	China	28047	ssRNA(+)	FALSE	FALSE	Sus scrofa
JX503060.1	Coronaviridae_2	Human coronavirus 229E isolate 0349, complete genome	Coronaviridae	Alphacoronavirus	Human coronavirus 229E	oronasopharynx	2010-06-01	Netherlands	27263	ssRNA(+)	FALSE	FALSE	Homo sapiens
JX503061.1	Coronaviridae_2	Human coronavirus 229E isolate J0304, complete genome	Coronaviridae	Alphacoronavirus	Human coronavirus 229E	oronasopharynx	2009-06-01	Italy	27208	ssRNA(+)	FALSE	FALSE	Homo sapiens
JX504050.1	Coronaviridae_24	Human coronavirus NL63 isolate NL63/RPTEC/2004, complete genome	Coronaviridae	Alphacoronavirus	Human coronavirus NL63		2004-06-01	USA	27553	ssRNA(+)	FALSE	FALSE	Homo sapiens
JX524137.1	Coronaviridae_17	Porcine epidemic diarrhea virus strain ZJCZ4, complete genome	Coronaviridae	Alphacoronavirus	Porcine epidemic diarrhea virus		2011-04-10	China	28038	ssRNA(+)	FALSE	FALSE	Sus scrofa
JX524171.1	Coronaviridae_24	Human coronavirus NL63 isolate CBJ123, complete genome	Coronaviridae	Alphacoronavirus	Human coronavirus NL63	oronasopharynx	2009-01-24	China	27538	ssRNA(+)	FALSE	FALSE	Homo sapiens
JX560761.1	Coronaviridae_17	Porcine epidemic diarrhea virus strain SD-M, complete genome	Coronaviridae	Alphacoronavirus	Porcine epidemic diarrhea virus		2012-02-15	China	27953	ssRNA(+)	FALSE	FALSE	Sus scrofa
JX647847.1	Coronaviridae_17	Porcine epidemic diarrhea virus strain GD-1, complete genome	Coronaviridae	Alphacoronavirus	Porcine epidemic diarrhea virus		2011-12-15	China	28047	ssRNA(+)	FALSE	FALSE	Sus scrofa
JX840411.1	Coronaviridae_6	Infectious bronchitis virus strain YX10, complete genome	Coronaviridae	Gammacoronavirus	Avian coronavirus		2010-10-15	China	27674	ssRNA(+)	FALSE	FALSE	Gallus gallus
JX860640.1	Coronaviridae_4	Canine respiratory coronavirus strain K37, complete genome	Coronaviridae	Betacoronavirus	Betacoronavirus 1	lung	2008-06-01	South Korea	31028	ssRNA(+)	FALSE	FALSE	Canis lupus familiaris
JX869059.2	Coronaviridae_26	Human betacoronavirus 2c EMC/2012, complete genome	Coronaviridae	Betacoronavirus	Middle East respiratory syndrome-related coronavirus		2012-06-13		30119	ssRNA(+)	FALSE	FALSE	Homo sapiens
JX897900.1	Coronaviridae_6	UNVERIFIED: Infectious bronchitis virus isolate GX-NN09032, complete genome	Coronaviridae	Gammacoronavirus	Avian coronavirus		2009-06-01	China	27684	ssRNA(+)	FALSE	FALSE	Gallus gallus
JX993987.1	Coronaviridae_3	Bat coronavirus Rp/Shaanxi2011, complete genome	Coronaviridae	Betacoronavirus	Severe acute respiratory syndrome-related coronavirus		2011-09-15	China	29484	ssRNA(+)	FALSE	FALSE	Rhinolophus pusillus
JX993988.1	Coronaviridae_3	Bat coronavirus Cp/Yunnan2011, complete genome	Coronaviridae	Betacoronavirus	Severe acute respiratory syndrome-related coronavirus		2011-06-01	China	29452	ssRNA(+)	FALSE	FALSE	Chaerephon plicatus
KC008600.1	Coronaviridae_6	Infectious bronchitis virus, complete genome	Coronaviridae	Gammacoronavirus	Avian coronavirus		1985-06-01	China	27701	ssRNA(+)	FALSE	FALSE	Gallus gallus
KC013541.1	Coronaviridae_6	Infectious bronchitis virus strain Ck/CH/LGD/120723, complete genome	Coronaviridae	Gammacoronavirus	Avian coronavirus		2012-07-12	China	27718	ssRNA(+)	FALSE	FALSE	Gallus gallus
KC119407.1	Coronaviridae_6	Infectious bronchitis virus strain Ck/CH/LGD/120724, complete genome	Coronaviridae	Gammacoronavirus	Avian coronavirus		2012-07-20	China	27718	ssRNA(+)	FALSE	FALSE	Gallus gallus
KC136209.1	Coronaviridae_6	Infectious bronchitis virus strain ck/CH/LJL/110302, complete genome	Coronaviridae	Gammacoronavirus	Avian coronavirus		2011-06-01	China	27685	ssRNA(+)	FALSE	FALSE	Gallus gallus
KC140102.1	Coronaviridae_17	Porcine epidemic diarrhea virus strain CH/FJZZ-9/2012, complete genome	Coronaviridae	Alphacoronavirus	Porcine epidemic diarrhea virus		2012-08-20	China	28038	ssRNA(+)	FALSE	FALSE	Sus scrofa
KC164505.2	Coronaviridae_26	Betacoronavirus England 1, complete genome	Coronaviridae	Betacoronavirus	Middle East respiratory syndrome-related coronavirus		2012-09-11	United Kingdom	30111	ssRNA(+)	FALSE	FALSE	Homo sapiens
KC175339.1	Coronaviridae_5	Canine coronavirus strain 171, complete genome	Coronaviridae	Alphacoronavirus	Alphacoronavirus 1		1971-06-01	Germany	29270	ssRNA(+)	FALSE	FALSE	Canis lupus familiaris
KC175340.1	Coronaviridae_5	Canine coronavirus strain K378, complete genome	Coronaviridae	Alphacoronavirus	Alphacoronavirus 1		1978-06-01	USA	29380	ssRNA(+)	FALSE	FALSE	Canis lupus familiaris
KC175341.1	Coronaviridae_5	Canine coronavirus strain S378, complete genome	Coronaviridae	Alphacoronavirus	Alphacoronavirus 1		1978-06-01	USA	29340	ssRNA(+)	FALSE	FALSE	Canis lupus familiaris
KC196276.1	Coronaviridae_17	Porcine epidemic diarrhea virus strain CH/ZMDZY/11, complete genome	Coronaviridae	Alphacoronavirus	Porcine epidemic diarrhea virus		2011-05-15	China	28038	ssRNA(+)	FALSE	FALSE	Sus scrofa
KC210145.1	Coronaviridae_17	Porcine epidemic diarrhea virus strain AH2012, complete genome	Coronaviridae	Alphacoronavirus	Porcine epidemic diarrhea virus		2012-03-15	China	28039	ssRNA(+)	FALSE	FALSE	Sus scrofa
KC210146.1	Coronaviridae_17	Porcine epidemic diarrhea virus strain JS2008, complete genome	Coronaviridae	Alphacoronavirus	Porcine epidemic diarrhea virus		2008-06-01	China	27954	ssRNA(+)	FALSE	FALSE	Sus scrofa
KC210147.1	Coronaviridae_17	Porcine epidemic diarrhea virus strain JS-HZ2012, complete genome	Coronaviridae	Alphacoronavirus	Porcine epidemic diarrhea virus		2012-06-01	China	28037	ssRNA(+)	FALSE	FALSE	Sus scrofa
KC461235.1	Coronaviridae_5	Feline infectious peritonitis virus isolate FCoVWSU791146_P1, complete genome	Coronaviridae	Alphacoronavirus	Alphacoronavirus 1		2011-06-01	USA	29357	ssRNA(+)	FALSE	FALSE	Felis catus
KC461236.1	Coronaviridae_5	Feline infectious peritonitis virus isolate FCoVWSU791146_P8, complete genome	Coronaviridae	Alphacoronavirus	Alphacoronavirus 1		2011-06-01	USA	29357	ssRNA(+)	FALSE	FALSE	Felis catus
KC461237.1	Coronaviridae_5	Feline infectious peritonitis virus isolate FCoVWSU791146_P50, complete genome	Coronaviridae	Alphacoronavirus	Alphacoronavirus 1		2011-06-01	USA	29357	ssRNA(+)	FALSE	FALSE	Felis catus
KC506155.1	Coronaviridae_6	Infectious bronchitis virus strain ck/CH/LJL/111054, complete genome	Coronaviridae	Gammacoronavirus	Avian coronavirus		2011-10-10	China	27648	ssRNA(+)	FALSE	FALSE	Gallus gallus
KC545383.1	Coronaviridae_27	Betacoronavirus Erinaceus/VMC/DEU/2012 isolate ErinaceusCoV/2012-174/GER/2012, complete genome	Coronaviridae	Betacoronavirus	Hedgehog coronavirus 1	feces	2012-06-01	Germany	30148	ssRNA(+)	FALSE	FALSE	Erinaceus europaeus
KC545386.1	Coronaviridae_27	Betacoronavirus Erinaceus/VMC/DEU/2012 isolate ErinaceusCoV/2012-216/GER/2012, complete genome	Coronaviridae	Betacoronavirus	Hedgehog coronavirus 1	feces	2012-06-01	Germany	30175	ssRNA(+)	FALSE	FALSE	Erinaceus europaeus
KC667074.1	Coronaviridae_26	Human betacoronavirus 2c England-Qatar/2012, complete genome	Coronaviridae	Betacoronavirus	Middle East respiratory syndrome-related coronavirus		2012-09-19	United Kingdom	30112	ssRNA(+)	FALSE	FALSE	Homo sapiens
KC776174.1	Coronaviridae_26	Human betacoronavirus 2c Jordan-N3/2012, complete genome	Coronaviridae	Betacoronavirus	Middle East respiratory syndrome-related coronavirus	lung	2012-04-15	Jordan	30030	ssRNA(+)	FALSE	FALSE	Homo sapiens
KC869678.4	Coronaviridae_26	Coronavirus Neoromicia/PML-PHE1/RSA/2011, complete genome	Coronaviridae	Betacoronavirus	Middle East respiratory syndrome-related coronavirus		2011-06-01	South Africa	30111	ssRNA(+)	FALSE	FALSE	Laephotis capensis
KC881005.1	Coronaviridae_3	Bat SARS-like coronavirus RsSHC014, complete genome	Coronaviridae	Betacoronavirus	Severe acute respiratory syndrome-related coronavirus		2011-04-17	China	29787	ssRNA(+)	FALSE	FALSE	Rhinolophus sinicus
KC881006.1	Coronaviridae_3	Bat SARS-like coronavirus Rs3367, complete genome	Coronaviridae	Betacoronavirus	Severe acute respiratory syndrome-related coronavirus		2012-03-19	China	29792	ssRNA(+)	FALSE	FALSE	Rhinolophus sinicus
KC962433.1	Coronaviridae_5	Transmissible gastroenteritis virus isolate TGEV-HX, complete genome	Coronaviridae	Alphacoronavirus	Alphacoronavirus 1		2012-05-05	China	28580	ssRNA(+)	FALSE	FALSE	Sus scrofa
KF186564.1	Coronaviridae_26	Middle East respiratory syndrome coronavirus isolate Al-Hasa_4_2013, complete genome	Coronaviridae	Betacoronavirus	Middle East respiratory syndrome-related coronavirus		2013-05-01	Saudi Arabia	30081	ssRNA(+)	FALSE	FALSE	Homo sapiens
KF186565.1	Coronaviridae_26	Middle East respiratory syndrome coronavirus isolate Al-Hasa_3_2013, complete genome	Coronaviridae	Betacoronavirus	Middle East respiratory syndrome-related coronavirus		2013-04-22	Saudi Arabia	30069	ssRNA(+)	FALSE	FALSE	Homo sapiens
KF186566.1	Coronaviridae_26	Middle East respiratory syndrome coronavirus isolate Al-Hasa_2_2013, complete genome	Coronaviridae	Betacoronavirus	Middle East respiratory syndrome-related coronavirus		2013-04-21	Saudi Arabia	30113	ssRNA(+)	FALSE	FALSE	Homo sapiens
KF186567.1	Coronaviridae_26	Middle East respiratory syndrome coronavirus isolate Al-Hasa_1_2013, complete genome	Coronaviridae	Betacoronavirus	Middle East respiratory syndrome-related coronavirus		2013-05-09	Saudi Arabia	30117	ssRNA(+)	FALSE	FALSE	Homo sapiens
KF192507.1	Coronaviridae_26	Middle East respiratory syndrome coronavirus, complete genome	Coronaviridae	Betacoronavirus	Middle East respiratory syndrome-related coronavirus		2013-06-01	United Arab Emirates	30123	ssRNA(+)	FALSE	FALSE	Homo sapiens
KF267450.1	Coronaviridae_17	Porcine epidemic diarrhea virus isolate 13-019349, complete genome	Coronaviridae	Alphacoronavirus	Porcine epidemic diarrhea virus	feces	2013-05-29	USA	28038	ssRNA(+)	FALSE	FALSE	Sus scrofa
KF272920.1	Coronaviridae_17	Porcine epidemic diarrhea virus strain USA/Colorado/2013, complete genome	Coronaviridae	Alphacoronavirus	Porcine epidemic diarrhea virus		2013-05-10	USA	28038	ssRNA(+)	FALSE	FALSE	Sus scrofa
KF294380.2	Coronaviridae_28	Lucheng Rn rat coronavirus isolate Lucheng-19, complete genome	Coronaviridae	Alphacoronavirus	Lucheng Rn rat coronavirus		2013-06-01	China	28763	ssRNA(+)	FALSE	FALSE	Rattus norvegicus
KF367457.1	Coronaviridae_3	Bat SARS-like coronavirus WIV1, complete genome	Coronaviridae	Betacoronavirus	Severe acute respiratory syndrome-related coronavirus		2012-09-15	China	30309	ssRNA(+)	FALSE	FALSE	Rhinolophus sinicus
KF384500.1	Coronaviridae_17	Porcine epidemic diarrhea virus strain CH/GDGZ/2012, complete genome	Coronaviridae	Alphacoronavirus	Porcine epidemic diarrhea virus		2012-03-15	China	28035	ssRNA(+)	FALSE	FALSE
KF411040.1	Coronaviridae_6	Infectious bronchitis virus strain CK/CH/LLN/111169, complete genome	Coronaviridae	Gammacoronavirus	Avian coronavirus		2011-11-22	China	27663	ssRNA(+)	FALSE	FALSE	Gallus gallus
KF411041.1	Coronaviridae_6	Infectious bronchitis virus strain CK/CH/LGX/091109, complete genome	Coronaviridae	Gammacoronavirus	Avian coronavirus		2009-11-10	China	27655	ssRNA(+)	FALSE	FALSE	Gallus gallus
KF430196.1	Coronaviridae_13	UNVERIFIED: Human coronavirus HKU1 strain HKU1/human/USA/HKU1-4/2005 genomic sequence	Coronaviridae	Betacoronavirus	Human coronavirus HKU1		2005-04-19	USA	29464	ssRNA(+)	FALSE	FALSE	Homo sapiens
KF430201.1	Coronaviridae_13	Human coronavirus HKU1 strain HKU1/human/USA/HKU1-18/2010, complete genome	Coronaviridae	Betacoronavirus	Human coronavirus HKU1		2010-01-22	USA	29934	ssRNA(+)	FALSE	FALSE	Homo sapiens
KF430219.1	Coronaviridae_29	Bat coronavirus CDPHE15/USA/2006, complete genome	Coronaviridae	Alphacoronavirus	Bat coronavirus CDPHE15		2006-08-07	USA	28035	ssRNA(+)	FALSE	FALSE	Myotis lucifugus
KF452322.1	Coronaviridae_17	Porcine epidemic diarrhea virus strain USA/Iowa/16465/2013, complete genome	Coronaviridae	Alphacoronavirus	Porcine epidemic diarrhea virus		2013-04-29	USA	28039	ssRNA(+)	FALSE	FALSE	Sus scrofa
KF452323.1	Coronaviridae_17	Porcine epidemic diarrhea virus strain USA/Indiana/17846/2013, complete genome	Coronaviridae	Alphacoronavirus	Porcine epidemic diarrhea virus		2013-05-07	USA	28039	ssRNA(+)	FALSE	FALSE	Sus scrofa
KF460437.1	Coronaviridae_6	Infectious bronchitis virus isolate VicS-v, complete genome	Coronaviridae	Gammacoronavirus	Avian coronavirus	allantoic fluid	2011-06-01	Australia	27610	ssRNA(+)	FALSE	FALSE	Gallus gallus
KF468752.1	Coronaviridae_17	Porcine epidemic diarrhea virus isolate MN, complete genome	Coronaviridae	Alphacoronavirus	Porcine epidemic diarrhea virus	feces	2013-06-19	USA	28038	ssRNA(+)	FALSE	FALSE	Sus scrofa
KF468753.1	Coronaviridae_17	Porcine epidemic diarrhea virus isolate IA1, complete genome	Coronaviridae	Alphacoronavirus	Porcine epidemic diarrhea virus	feces	2013-06-01	USA	28038	ssRNA(+)	FALSE	FALSE	Sus scrofa
KF468754.1	Coronaviridae_17	Porcine epidemic diarrhea virus isolate IA2, complete genome	Coronaviridae	Alphacoronavirus	Porcine epidemic diarrhea virus	abdominal cavity	2013-06-01	USA	28038	ssRNA(+)	FALSE	FALSE	Sus scrofa
KF514430.1	Coronaviridae_2	Human coronavirus 229E strain 229E/human/USA/933-50/1993, complete genome	Coronaviridae	Alphacoronavirus	Human coronavirus 229E		1993-03-18	USA	27169	ssRNA(+)	FALSE	FALSE	Homo sapiens
KF514432.1	Coronaviridae_2	Human coronavirus 229E strain 229E/human/USA/932-72/1993, complete genome	Coronaviridae	Alphacoronavirus	Human coronavirus 229E		1993-02-22	USA	27138	ssRNA(+)	FALSE	FALSE	Homo sapiens
KF514433.1	Coronaviridae_2	Human coronavirus 229E strain 229E/human/USA/933-40/1993, complete genome	Coronaviridae	Alphacoronavirus	Human coronavirus 229E		1993-03-11	USA	27165	ssRNA(+)	FALSE	FALSE	Homo sapiens
KF530060.1	Coronaviridae_4	Human coronavirus OC43 strain OC43/human/USA/851-15/1985, complete genome	Coronaviridae	Betacoronavirus	Betacoronavirus 1		1985-01-08	USA	30577	ssRNA(+)	FALSE	FALSE	Homo sapiens
KF530061.1	Coronaviridae_4	Human coronavirus OC43 strain OC43/human/USA/901-43/1990, complete genome	Coronaviridae	Betacoronavirus	Betacoronavirus 1		1990-01-19	USA	30577	ssRNA(+)	FALSE	FALSE	Homo sapiens
KF530063.1	Coronaviridae_4	Human coronavirus OC43 strain OC43/human/USA/9612-48/1996, complete genome	Coronaviridae	Betacoronavirus	Betacoronavirus 1		1996-12-30	USA	30577	ssRNA(+)	FALSE	FALSE	Homo sapiens
KF530064.1	Coronaviridae_4	Human coronavirus OC43 strain OC43/human/USA/9612-9/1996, complete genome	Coronaviridae	Betacoronavirus	Betacoronavirus 1		1996-12-04	USA	30577	ssRNA(+)	FALSE	FALSE	Homo sapiens
KF530065.1	Coronaviridae_4	Human coronavirus OC43 strain OC43/human/USA/901-41/1990, complete genome	Coronaviridae	Betacoronavirus	Betacoronavirus 1		1990-01-17	USA	30577	ssRNA(+)	FALSE	FALSE	Homo sapiens
KF530066.1	Coronaviridae_4	Human coronavirus OC43 strain OC43/human/USA/901-33/1990, complete genome	Coronaviridae	Betacoronavirus	Betacoronavirus 1		1990-01-16	USA	30564	ssRNA(+)	FALSE	FALSE	Homo sapiens
KF530067.1	Coronaviridae_4	Human coronavirus OC43 strain OC43/human/USA/912-10/1991, complete genome	Coronaviridae	Betacoronavirus	Betacoronavirus 1		1991-02-07	USA	30608	ssRNA(+)	FALSE	FALSE	Homo sapiens
KF530068.1	Coronaviridae_4	Human coronavirus OC43 strain OC43/human/USA/007-11/2000, complete genome	Coronaviridae	Betacoronavirus	Betacoronavirus 1		2000-07-27	USA	30572	ssRNA(+)	FALSE	FALSE	Homo sapiens
KF530069.1	Coronaviridae_4	Human coronavirus OC43 strain OC43/human/USA/982-4/1998, complete genome	Coronaviridae	Betacoronavirus	Betacoronavirus 1		1998-02-05	USA	30578	ssRNA(+)	FALSE	FALSE	Homo sapiens
KF530070.1	Coronaviridae_4	Human coronavirus OC43 strain OC43/human/USA/991-19/1999, complete genome	Coronaviridae	Betacoronavirus	Betacoronavirus 1		1999-01-15	USA	30573	ssRNA(+)	FALSE	FALSE	Homo sapiens
KF530071.1	Coronaviridae_4	Human coronavirus OC43 strain OC43/human/USA/925-1/1992, complete genome	Coronaviridae	Betacoronavirus	Betacoronavirus 1		1992-05-04	USA	30578	ssRNA(+)	FALSE	FALSE	Homo sapiens
KF530072.1	Coronaviridae_4	Human coronavirus OC43 strain OC43/human/USA/9712-13/1997, complete genome	Coronaviridae	Betacoronavirus	Betacoronavirus 1		1997-12-11	USA	30577	ssRNA(+)	FALSE	FALSE	Homo sapiens
KF530073.1	Coronaviridae_4	Human coronavirus OC43 strain OC43/human/USA/8912-37/1989, complete genome	Coronaviridae	Betacoronavirus	Betacoronavirus 1		1989-12-21	USA	30577	ssRNA(+)	FALSE	FALSE	Homo sapiens
KF530074.1	Coronaviridae_4	Human coronavirus OC43 strain OC43/human/USA/9212-33/1992, complete genome	Coronaviridae	Betacoronavirus	Betacoronavirus 1		1992-12-16	USA	30590	ssRNA(+)	FALSE	FALSE	Homo sapiens
KF530075.1	Coronaviridae_4	Human coronavirus OC43 strain OC43/human/USA/953-23/1995, complete genome	Coronaviridae	Betacoronavirus	Betacoronavirus 1		1995-03-09	USA	30577	ssRNA(+)	FALSE	FALSE	Homo sapiens
KF530076.1	Coronaviridae_4	Human coronavirus OC43 strain OC43/human/USA/911-11/1991, complete genome	Coronaviridae	Betacoronavirus	Betacoronavirus 1		1991-01-03	USA	30606	ssRNA(+)	FALSE	FALSE	Homo sapiens
KF530077.1	Coronaviridae_4	Human coronavirus OC43 strain OC43/human/USA/873-16/1987, complete genome	Coronaviridae	Betacoronavirus	Betacoronavirus 1		1987-03-12	USA	30577	ssRNA(+)	FALSE	FALSE	Homo sapiens
KF530078.1	Coronaviridae_4	Human coronavirus OC43 strain OC43/human/USA/9612-29/1996, complete genome	Coronaviridae	Betacoronavirus	Betacoronavirus 1		1996-12-17	USA	30568	ssRNA(+)	FALSE	FALSE	Homo sapiens
KF530079.1	Coronaviridae_4	Human coronavirus OC43 strain OC43/human/USA/913-29/1991, complete genome	Coronaviridae	Betacoronavirus	Betacoronavirus 1		1991-03-14	USA	30581	ssRNA(+)	FALSE	FALSE	Homo sapiens
KF530080.1	Coronaviridae_4	Human coronavirus OC43 strain OC43/human/USA/9712-31/1997, complete genome	Coronaviridae	Betacoronavirus	Betacoronavirus 1		1997-12-18	USA	30577	ssRNA(+)	FALSE	FALSE	Homo sapiens
KF530081.1	Coronaviridae_4	Human coronavirus OC43 strain OC43/human/USA/991-5/1999, complete genome	Coronaviridae	Betacoronavirus	Betacoronavirus 1		1999-01-07	USA	30571	ssRNA(+)	FALSE	FALSE	Homo sapiens
KF530083.1	Coronaviridae_4	Human coronavirus OC43 strain OC43/human/USA/873-19/1987, complete genome	Coronaviridae	Betacoronavirus	Betacoronavirus 1		1987-03-17	USA	30577	ssRNA(+)	FALSE	FALSE	Homo sapiens
KF530084.1	Coronaviridae_4	Human coronavirus OC43 strain OC43/human/USA/951-18/1995, complete genome	Coronaviridae	Betacoronavirus	Betacoronavirus 1		1995-01-12	USA	30577	ssRNA(+)	FALSE	FALSE	Homo sapiens
KF530085.1	Coronaviridae_4	Human coronavirus OC43 strain OC43/human/USA/871-25/1987, complete genome	Coronaviridae	Betacoronavirus	Betacoronavirus 1		1987-01-22	USA	30569	ssRNA(+)	FALSE	FALSE	Homo sapiens
KF530086.1	Coronaviridae_4	Human coronavirus OC43 strain OC43/human/USA/872-5/1987, complete genome	Coronaviridae	Betacoronavirus	Betacoronavirus 1		1987-02-10	USA	30577	ssRNA(+)	FALSE	FALSE	Homo sapiens
KF530087.1	Coronaviridae_4	Human coronavirus OC43 strain OC43/human/USA/873-6/1987, complete genome	Coronaviridae	Betacoronavirus	Betacoronavirus 1		1987-03-05	USA	30577	ssRNA(+)	FALSE	FALSE	Homo sapiens
KF530088.1	Coronaviridae_4	Human coronavirus OC43 strain OC43/human/USA/901-54/1990, complete genome	Coronaviridae	Betacoronavirus	Betacoronavirus 1		1990-01-23	USA	30578	ssRNA(+)	FALSE	FALSE	Homo sapiens
KF530089.1	Coronaviridae_4	Human coronavirus OC43 strain OC43/human/USA/911-66/1991, complete genome	Coronaviridae	Betacoronavirus	Betacoronavirus 1		1991-01-29	USA	30611	ssRNA(+)	FALSE	FALSE	Homo sapiens
KF530090.1	Coronaviridae_4	Human coronavirus OC43 strain OC43/human/USA/931-85/1993, complete genome	Coronaviridae	Betacoronavirus	Betacoronavirus 1		1993-01-26	USA	30577	ssRNA(+)	FALSE	FALSE	Homo sapiens
KF530091.1	Coronaviridae_4	Human coronavirus OC43 strain OC43/human/USA/911-58/1991, complete genome	Coronaviridae	Betacoronavirus	Betacoronavirus 1		1991-01-24	USA	30606	ssRNA(+)	FALSE	FALSE	Homo sapiens
KF530092.1	Coronaviridae_4	Human coronavirus OC43 strain OC43/human/USA/008-5/2000, complete genome	Coronaviridae	Betacoronavirus	Betacoronavirus 1		2000-08-08	USA	30577	ssRNA(+)	FALSE	FALSE	Homo sapiens
KF530094.1	Coronaviridae_4	Human coronavirus OC43 strain OC43/human/USA/912-36/1991, complete genome	Coronaviridae	Betacoronavirus	Betacoronavirus 1		1991-02-22	USA	30581	ssRNA(+)	FALSE	FALSE	Homo sapiens
KF530095.1	Coronaviridae_4	Human coronavirus OC43 strain OC43/human/USA/912-6/1991, complete genome	Coronaviridae	Betacoronavirus	Betacoronavirus 1		1991-02-05	USA	30602	ssRNA(+)	FALSE	FALSE	Homo sapiens
KF530096.1	Coronaviridae_4	Human coronavirus OC43 strain OC43/human/USA/911-38/1991, complete genome	Coronaviridae	Betacoronavirus	Betacoronavirus 1		1991-01-15	USA	30589	ssRNA(+)	FALSE	FALSE	Homo sapiens
KF530097.1	Coronaviridae_4	Human coronavirus OC43 strain OC43/human/USA/9211-43/1992, complete genome	Coronaviridae	Betacoronavirus	Betacoronavirus 1		1992-11-30	USA	30577	ssRNA(+)	FALSE	FALSE	Homo sapiens
KF530098.1	Coronaviridae_4	Human coronavirus OC43 strain OC43/human/USA/965-6/1996, complete genome	Coronaviridae	Betacoronavirus	Betacoronavirus 1		1996-05-10	USA	30578	ssRNA(+)	FALSE	FALSE	Homo sapiens
KF530099.1	Coronaviridae_4	Human coronavirus OC43 strain OC43/human/USA/971-5/1997, complete genome	Coronaviridae	Betacoronavirus	Betacoronavirus 1		1997-01-02	USA	30578	ssRNA(+)	FALSE	FALSE	Homo sapiens
KF530104.1	Coronaviridae_24	Human coronavirus NL63 strain NL63/human/USA/904-20/1990, complete genome	Coronaviridae	Alphacoronavirus	Human coronavirus NL63		1990-04-26	USA	27410	ssRNA(+)	FALSE	FALSE	Homo sapiens
KF530105.1	Coronaviridae_24	Human coronavirus NL63 strain NL63/human/USA/012-31/2001, complete genome	Coronaviridae	Alphacoronavirus	Human coronavirus NL63		2001-02-23	USA	27413	ssRNA(+)	FALSE	FALSE	Homo sapiens
KF530106.1	Coronaviridae_24	Human coronavirus NL63 strain NL63/human/USA/8712-17/1987, complete genome	Coronaviridae	Alphacoronavirus	Human coronavirus NL63		1987-12-16	USA	27401	ssRNA(+)	FALSE	FALSE	Homo sapiens
KF530107.1	Coronaviridae_24	Human coronavirus NL63 strain NL63/human/USA/911-56/1991, complete genome	Coronaviridae	Alphacoronavirus	Human coronavirus NL63		1991-01-24	USA	27410	ssRNA(+)	FALSE	FALSE	Homo sapiens
KF530108.1	Coronaviridae_24	Human coronavirus NL63 strain NL63/human/USA/891-6/1989, complete genome	Coronaviridae	Alphacoronavirus	Human coronavirus NL63		1989-01-05	USA	27410	ssRNA(+)	FALSE	FALSE	Homo sapiens
KF530109.1	Coronaviridae_24	Human coronavirus NL63 strain NL63/human/USA/903-28/1990, complete genome	Coronaviridae	Alphacoronavirus	Human coronavirus NL63		1990-03-21	USA	27410	ssRNA(+)	FALSE	FALSE	Homo sapiens
KF530110.1	Coronaviridae_24	Human coronavirus NL63 strain NL63/human/USA/838-9/1983, complete genome	Coronaviridae	Alphacoronavirus	Human coronavirus NL63		1983-08-16	USA	27413	ssRNA(+)	FALSE	FALSE	Homo sapiens
KF530111.1	Coronaviridae_24	Human coronavirus NL63 strain NL63/human/USA/901-24/1990, complete genome	Coronaviridae	Alphacoronavirus	Human coronavirus NL63		1990-01-05	USA	27410	ssRNA(+)	FALSE	FALSE	Homo sapiens
KF530112.1	Coronaviridae_24	Human coronavirus NL63 strain NL63/human/USA/0111-25/2001, complete genome	Coronaviridae	Alphacoronavirus	Human coronavirus NL63		2001-11-21	USA	27395	ssRNA(+)	FALSE	FALSE	Homo sapiens
KF530113.1	Coronaviridae_24	Human coronavirus NL63 strain NL63/human/USA/905-25/1990, complete genome	Coronaviridae	Alphacoronavirus	Human coronavirus NL63		1990-05-29	USA	27410	ssRNA(+)	FALSE	FALSE	Homo sapiens
KF530114.1	Coronaviridae_24	Human coronavirus NL63 strain NL63/human/USA/891-4/1989, complete genome	Coronaviridae	Alphacoronavirus	Human coronavirus NL63		1989-01-03	USA	27410	ssRNA(+)	FALSE	FALSE	Homo sapiens
KF530115.1	Coronaviridae_10	UNVERIFIED: Feline coronavirus strain Felis catus/NLD/UU68/2010 genomic sequence	Coronaviridae	Alphacoronavirus	Alphacoronavirus 1		2010-04-27	Netherlands	29002	ssRNA(+)	FALSE	FALSE	Felis catus
KF530116.1	Coronaviridae_10	UNVERIFIED: Feline coronavirus strain Felis catus/NLD/UU61/2010 genomic sequence	Coronaviridae	Alphacoronavirus	Alphacoronavirus 1		2010-01-07	Netherlands	29062	ssRNA(+)	FALSE	FALSE	Felis catus
KF530117.1	Coronaviridae_10	UNVERIFIED: Feline coronavirus strain Felis catus/NLD/UU82/2010 genomic sequence	Coronaviridae	Alphacoronavirus	Alphacoronavirus 1		2010-08-12	Netherlands	29001	ssRNA(+)	FALSE	FALSE	Felis catus
KF530118.1	Coronaviridae_10	UNVERIFIED: Feline coronavirus strain Felis catus/NLD/UU77/2009 genomic sequence	Coronaviridae	Alphacoronavirus	Alphacoronavirus 1		2009-06-21	Netherlands	27338	ssRNA(+)	FALSE	FALSE	Felis catus
KF530119.1	Coronaviridae_10	UNVERIFIED: Feline coronavirus strain Felis catus/NLD/UU37/2009 genomic sequence	Coronaviridae	Alphacoronavirus	Alphacoronavirus 1		2009-08-27	Netherlands	28918	ssRNA(+)	FALSE	FALSE	Felis catus
KF530120.1	Coronaviridae_10	UNVERIFIED: Feline coronavirus strain Felis catus/NLD/UU73/2011 genomic sequence	Coronaviridae	Alphacoronavirus	Alphacoronavirus 1		2011-05-14	Netherlands	28353	ssRNA(+)	FALSE	FALSE	Felis catus
KF530121.1	Coronaviridae_10	UNVERIFIED: Feline coronavirus strain Felis catus/NLD/UU43/2007 genomic sequence	Coronaviridae	Alphacoronavirus	Alphacoronavirus 1		2007-08-13	Netherlands	28898	ssRNA(+)	FALSE	FALSE	Felis catus
KF530122.1	Coronaviridae_10	UNVERIFIED: Feline coronavirus strain Felis catus/NLD/UU36/2009 genomic sequence	Coronaviridae	Alphacoronavirus	Alphacoronavirus 1		2009-08-27	Netherlands	28990	ssRNA(+)	FALSE	FALSE	Felis catus
KF530123.1	Coronaviridae_10	Feline coronavirus strain Felis catus/NLD/UU88/2010, complete genome	Coronaviridae	Alphacoronavirus	Alphacoronavirus 1		2010-08-17	Netherlands	29123	ssRNA(+)	FALSE	FALSE	Felis catus
KF530124.1	Coronaviridae_10	UNVERIFIED: Feline coronavirus strain Felis catus/NLD/UU76/2010 genomic sequence	Coronaviridae	Alphacoronavirus	Alphacoronavirus 1		2010-11-23	Netherlands	28996	ssRNA(+)	FALSE	FALSE	Felis catus
KF530125.1	Coronaviridae_10	UNVERIFIED: Feline coronavirus strain Felis catus/NLD/UU67/2010 genomic sequence	Coronaviridae	Alphacoronavirus	Alphacoronavirus 1		2010-06-22	Netherlands	28829	ssRNA(+)	FALSE	FALSE	Felis catus
KF530126.1	Coronaviridae_10	UNVERIFIED: Feline coronavirus strain Felis catus/NLD/UU71/2010 genomic sequence	Coronaviridae	Alphacoronavirus	Alphacoronavirus 1		2010-08-24	Netherlands	28306	ssRNA(+)	FALSE	FALSE	Felis catus
KF530127.1	Coronaviridae_10	UNVERIFIED: Feline coronavirus strain Felis catus/NLD/UU74/2010 genomic sequence	Coronaviridae	Alphacoronavirus	Alphacoronavirus 1		2010-09-06	Netherlands	29023	ssRNA(+)	FALSE	FALSE	Felis catus
KF530129.1	Coronaviridae_10	UNVERIFIED: Feline coronavirus strain Felis catus/NLD/UU50/2010 genomic sequence	Coronaviridae	Alphacoronavirus	Alphacoronavirus 1		2010-06-30	Netherlands	29081	ssRNA(+)	FALSE	FALSE	Felis catus
KF530130.1	Coronaviridae_10	UNVERIFIED: Feline coronavirus strain Felis catus/NLD/UU69/2010 genomic sequence	Coronaviridae	Alphacoronavirus	Alphacoronavirus 1		2010-08-17	Netherlands	29086	ssRNA(+)	FALSE	FALSE	Felis catus
KF530131.1	Coronaviridae_10	UNVERIFIED: Feline coronavirus strain Felis catus/NLD/UU72/2010 genomic sequence	Coronaviridae	Alphacoronavirus	Alphacoronavirus 1		2010-09-20	Netherlands	28357	ssRNA(+)	FALSE	FALSE	Felis catus
KF530133.1	Coronaviridae_10	UNVERIFIED: Feline coronavirus strain Felis catus/NLD/UU44/2007 genomic sequence	Coronaviridae	Alphacoronavirus	Alphacoronavirus 1		2007-06-26	Netherlands	29091	ssRNA(+)	FALSE	FALSE	Felis catus
KF530134.1	Coronaviridae_10	UNVERIFIED: Feline coronavirus strain Felis catus/NLD/UU63/2010 genomic sequence	Coronaviridae	Alphacoronavirus	Alphacoronavirus 1		2010-03-12	Netherlands	29079	ssRNA(+)	FALSE	FALSE	Felis catus
KF530135.1	Coronaviridae_10	UNVERIFIED: Feline coronavirus strain Felis catus/NLD/UU55/2010 genomic sequence	Coronaviridae	Alphacoronavirus	Alphacoronavirus 1		2010-06-17	Netherlands	28338	ssRNA(+)	FALSE	FALSE	Felis catus
KF530136.1	Coronaviridae_10	UNVERIFIED: Feline coronavirus strain Felis catus/NLD/UU62/2010 genomic sequence	Coronaviridae	Alphacoronavirus	Alphacoronavirus 1		2010-01-27	Netherlands	29076	ssRNA(+)	FALSE	FALSE	Felis catus
KF530270.1	Coronaviridae_10	UNVERIFIED: Feline coronavirus strain feline/USA/Muff1-09/2008 genomic sequence	Coronaviridae	Alphacoronavirus	Alphacoronavirus 1		2008-11-26	USA	28457	ssRNA(+)	FALSE	FALSE	Felis catus
KF530271.1	Coronaviridae_10	UNVERIFIED: Feline coronavirus strain feline/USA/236kid/2011 genomic sequence	Coronaviridae	Alphacoronavirus	Alphacoronavirus 1		2011-03-17	USA	28039	ssRNA(+)	FALSE	FALSE	Felis catus
KF569996.1	Coronaviridae_3	Rhinolophus affinis coronavirus isolate LYRa11, complete genome	Coronaviridae	Betacoronavirus	Severe acute respiratory syndrome-related coronavirus		2011-06-01	China	29805	ssRNA(+)	FALSE	FALSE	Rhinolophus affinis
KF574761.1	Coronaviridae_6	Infectious bronchitis virus isolate SDIB821/2012, complete genome	Coronaviridae	Gammacoronavirus	Avian coronavirus		2012-06-01		27677	ssRNA(+)	FALSE	FALSE	Gallus gallus
KF600612.1	Coronaviridae_26	Middle East respiratory syndrome coronavirus isolate Riyadh_1_2012, complete genome	Coronaviridae	Betacoronavirus	Middle East respiratory syndrome-related coronavirus		2012-10-23	Saudi Arabia	30063	ssRNA(+)	FALSE	FALSE	Homo sapiens
KF600613.1	Coronaviridae_26	Middle East respiratory syndrome coronavirus isolate Riyadh_3_2013, complete genome	Coronaviridae	Betacoronavirus	Middle East respiratory syndrome-related coronavirus		2013-02-05	Saudi Arabia	30064	ssRNA(+)	FALSE	FALSE	Homo sapiens
KF600620.1	Coronaviridae_26	Middle East respiratory syndrome coronavirus isolate Bisha_1_2012, complete genome	Coronaviridae	Betacoronavirus	Middle East respiratory syndrome-related coronavirus		2012-06-19	Saudi Arabia	30056	ssRNA(+)	FALSE	FALSE	Homo sapiens
KF600627.1	Coronaviridae_26	Middle East respiratory syndrome coronavirus isolate Al-Hasa_12_2013, complete genome	Coronaviridae	Betacoronavirus	Middle East respiratory syndrome-related coronavirus		2013-05-07	Saudi Arabia	30076	ssRNA(+)	FALSE	FALSE	Homo sapiens
KF600628.1	Coronaviridae_26	Middle East respiratory syndrome coronavirus isolate Hafr-Al-Batin_1_2013, complete genome	Coronaviridae	Betacoronavirus	Middle East respiratory syndrome-related coronavirus		2013-06-04	Saudi Arabia	30104	ssRNA(+)	FALSE	FALSE	Homo sapiens
KF600630.1	Coronaviridae_26	Middle East respiratory syndrome coronavirus isolate Buraidah_1_2013, complete genome	Coronaviridae	Betacoronavirus	Middle East respiratory syndrome-related coronavirus		2013-05-13	Saudi Arabia	30081	ssRNA(+)	FALSE	FALSE	Homo sapiens
KF600632.1	Coronaviridae_26	Middle East respiratory syndrome coronavirus isolate Al-Hasa_19_2013, complete genome	Coronaviridae	Betacoronavirus	Middle East respiratory syndrome-related coronavirus		2013-05-23	Saudi Arabia	30108	ssRNA(+)	FALSE	FALSE	Homo sapiens
KF600634.1	Coronaviridae_26	Middle East respiratory syndrome coronavirus isolate Al-Hasa_21_2013, complete genome	Coronaviridae	Betacoronavirus	Middle East respiratory syndrome-related coronavirus		2013-05-30	Saudi Arabia	30063	ssRNA(+)	FALSE	FALSE	Homo sapiens
KF600644.1	Coronaviridae_26	Middle East respiratory syndrome coronavirus isolate Al-Hasa_16_2013, complete genome	Coronaviridae	Betacoronavirus	Middle East respiratory syndrome-related coronavirus		2013-05-12	Saudi Arabia	30078	ssRNA(+)	FALSE	FALSE	Homo sapiens
KF600645.1	Coronaviridae_26	Middle East respiratory syndrome coronavirus isolate Al-Hasa_15_2013, complete genome	Coronaviridae	Betacoronavirus	Middle East respiratory syndrome-related coronavirus		2013-05-11	Saudi Arabia	30071	ssRNA(+)	FALSE	FALSE	Homo sapiens
KF600647.1	Coronaviridae_26	Middle East respiratory syndrome coronavirus isolate Al-Hasa_17_2013, complete genome	Coronaviridae	Betacoronavirus	Middle East respiratory syndrome-related coronavirus		2013-05-15	Saudi Arabia	30115	ssRNA(+)	FALSE	FALSE	Homo sapiens
KF600652.1	Coronaviridae_26	Middle East respiratory syndrome coronavirus isolate Riyadh_2_2012, complete genome	Coronaviridae	Betacoronavirus	Middle East respiratory syndrome-related coronavirus		2012-10-30	Saudi Arabia	30082	ssRNA(+)	FALSE	FALSE	Homo sapiens
KF636752.1	Coronaviridae_30	Bat Hp-betacoronavirus/Zhejiang2013, complete genome	Coronaviridae	Betacoronavirus	Bat Hp-betacoronavirus Zhejiang2013		2013-04-29	China	31491	ssRNA(+)	FALSE	FALSE	Hipposideros pratti
KF650370.1	Coronaviridae_17	Porcine epidemic diarrhea virus isolate ISU13-19338E-IN-homogenate, complete genome	Coronaviridae	Alphacoronavirus	Porcine epidemic diarrhea virus		2013-05-16	USA	28038	ssRNA(+)	FALSE	FALSE	Sus scrofa
KF650373.1	Coronaviridae_17	Porcine epidemic diarrhea virus isolate ISU13-22038-IA-homogenate, complete genome	Coronaviridae	Alphacoronavirus	Porcine epidemic diarrhea virus		2013-06-06	USA	28038	ssRNA(+)	FALSE	FALSE	Sus scrofa
KF668605.1	Coronaviridae_6	Infectious bronchitis virus isolate CK/CH/SD09/005, complete genome	Coronaviridae	Gammacoronavirus	Avian coronavirus		2009-06-01	China	27691	ssRNA(+)	FALSE	FALSE	Gallus gallus
KF686338.1	Coronaviridae_13	UNVERIFIED: Human coronavirus HKU1 strain HKU1/human/USA/HKU1-1/2005 genomic sequence	Coronaviridae	Betacoronavirus	Human coronavirus HKU1		2005-02-18	USA	29536	ssRNA(+)	FALSE	FALSE	Homo sapiens
KF686339.1	Coronaviridae_13	UNVERIFIED: Human coronavirus HKU1 strain HKU1/human/USA/HKU1-3/2009 genomic sequence	Coronaviridae	Betacoronavirus	Human coronavirus HKU1		2009-10-31	USA	29790	ssRNA(+)	FALSE	FALSE	Homo sapiens
KF686340.1	Coronaviridae_13	Human coronavirus HKU1 strain HKU1/human/USA/HKU1-5/2009, complete genome	Coronaviridae	Betacoronavirus	Human coronavirus HKU1		2009-11-28	USA	29923	ssRNA(+)	FALSE	FALSE	Homo sapiens
KF686341.1	Coronaviridae_13	Human coronavirus HKU1 strain HKU1/human/USA/HKU1-10/2010, complete genome	Coronaviridae	Betacoronavirus	Human coronavirus HKU1		2010-01-16	USA	29832	ssRNA(+)	FALSE	FALSE	Homo sapiens
KF686342.1	Coronaviridae_13	Human coronavirus HKU1 strain HKU1/human/USA/HKU1-11/2009, complete genome	Coronaviridae	Betacoronavirus	Human coronavirus HKU1		2009-12-13	USA	29742	ssRNA(+)	FALSE	FALSE	Homo sapiens
KF686343.1	Coronaviridae_13	Human coronavirus HKU1 strain HKU1/human/USA/HKU1-13/2010, complete genome	Coronaviridae	Betacoronavirus	Human coronavirus HKU1		2010-01-08	USA	29983	ssRNA(+)	FALSE	FALSE	Homo sapiens
KF686344.1	Coronaviridae_13	Human coronavirus HKU1 strain HKU1/human/USA/HKU1-15/2009, complete genome	Coronaviridae	Betacoronavirus	Human coronavirus HKU1		2009-12-28	USA	29695	ssRNA(+)	FALSE	FALSE	Homo sapiens
KF686345.1	Coronaviridae_13	UNVERIFIED: Human coronavirus HKU1 strain HKU1/human/USA/HKU1-20/2010 genomic sequence	Coronaviridae	Betacoronavirus	Human coronavirus HKU1		2010-01-30	USA	29848	ssRNA(+)	FALSE	FALSE	Homo sapiens
KF686346.1	Coronaviridae_13	Human coronavirus HKU1 strain HKU1/human/USA/HKU1-12/2010, complete genome	Coronaviridae	Betacoronavirus	Human coronavirus HKU1		2010-01-09	USA	29982	ssRNA(+)	FALSE	FALSE	Homo sapiens
KF696629.1	Coronaviridae_6	Infectious bronchitis virus strain Connecticut vaccine, complete genome	Coronaviridae	Gammacoronavirus	Avian coronavirus		2013-08-01	China	27630	ssRNA(+)	FALSE	FALSE
KF760557.2	Coronaviridae_17	Porcine epidemic diarrhea virus strain CH/JX-1/2013, complete genome	Coronaviridae	Alphacoronavirus	Porcine epidemic diarrhea virus		2013-03-15	China	28052	ssRNA(+)	FALSE	FALSE	Sus scrofa
KF761675.1	Coronaviridae_17	Porcine epidemic diarrhea virus strain CH/YNKM-8/2013, complete genome	Coronaviridae	Alphacoronavirus	Porcine epidemic diarrhea virus		2013-09-20	China	28038	ssRNA(+)	FALSE	FALSE
KF804028.1	Coronaviridae_17	Porcine epidemic diarrhea virus isolate USA/Iowa/18984/2013, complete genome	Coronaviridae	Alphacoronavirus	Porcine epidemic diarrhea virus		2013-05-16	USA	28039	ssRNA(+)	FALSE	FALSE	Sus scrofa
KF840537.1	Coronaviridae_17	Porcine epidemic diarrhea virus isolate CH/ZJCX-1/2012, complete genome	Coronaviridae	Alphacoronavirus	Porcine epidemic diarrhea virus	feces, abdominal cavity	2012-03-04	China	27992	ssRNA(+)	FALSE	FALSE	Sus scrofa
KF850450.2	Coronaviridae_13	UNVERIFIED: Human coronavirus HKU1 strain HKU1/human/USA/1102/2005 genomic sequence	Coronaviridae	Betacoronavirus	Human coronavirus HKU1		2005-04-09	USA	29557	ssRNA(+)	FALSE	FALSE	Homo sapiens
KF853202.1	Coronaviridae_6	Infectious bronchitis virus isolate SDZB0808, complete genome	Coronaviridae	Gammacoronavirus	Avian coronavirus		2008-07-11	China	27677	ssRNA(+)	FALSE	FALSE	Gallus gallus
KF906249.1	Coronaviridae_4	Dromedary camel coronavirus HKU23 strain HKU23-265F, complete genome	Coronaviridae	Betacoronavirus	Betacoronavirus 1		2013-04-03	United Arab Emirates	31052	ssRNA(+)	FALSE	FALSE	Camelus bactrianus
KF906250.1	Coronaviridae_4	Dromedary camel coronavirus HKU23 strain HKU23-362F, complete genome	Coronaviridae	Betacoronavirus	Betacoronavirus 1		2013-05-15	United Arab Emirates	31052	ssRNA(+)	FALSE	FALSE	Camelus bactrianus
KF906251.1	Coronaviridae_4	Dromedary camel coronavirus HKU23 strain HKU23-368F, complete genome	Coronaviridae	Betacoronavirus	Betacoronavirus 1		2013-05-21	United Arab Emirates	31052	ssRNA(+)	FALSE	FALSE	Camelus bactrianus
KF917527.1	Coronaviridae_26	Middle East respiratory syndrome coronavirus isolate MERS-CoV-Jeddah-Camel-1, complete genome	Coronaviridae	Betacoronavirus	Middle East respiratory syndrome-related coronavirus		2013-11-08	Saudi Arabia	29851	ssRNA(+)	FALSE	FALSE	Camelus
KF923886.1	Coronaviridae_4	Human coronavirus OC43 isolate 1908A/2010, complete genome	Coronaviridae	Betacoronavirus	Betacoronavirus 1	oronasopharynx	2010-03-15	China	30719	ssRNA(+)	FALSE	FALSE	Homo sapiens
KF923887.1	Coronaviridae_4	Human coronavirus OC43 isolate 1997A/2010, complete genome	Coronaviridae	Betacoronavirus	Betacoronavirus 1	oronasopharynx	2010-04-15	China	30719	ssRNA(+)	FALSE	FALSE	Homo sapiens
KF923889.1	Coronaviridae_4	Human coronavirus OC43 isolate 1926/2006, complete genome	Coronaviridae	Betacoronavirus	Betacoronavirus 1	oronasopharynx	2006-03-15	China	30719	ssRNA(+)	FALSE	FALSE	Homo sapiens
KF923890.1	Coronaviridae_4	Human coronavirus OC43 isolate 39A/2007, complete genome	Coronaviridae	Betacoronavirus	Betacoronavirus 1	oronasopharynx	2007-04-15	China	30713	ssRNA(+)	FALSE	FALSE	Homo sapiens
KF923892.1	Coronaviridae_4	Human coronavirus OC43 isolate 5345/2007, complete genome	Coronaviridae	Betacoronavirus	Betacoronavirus 1	oronasopharynx	2007-05-15	China	30713	ssRNA(+)	FALSE	FALSE	Homo sapiens
KF923893.1	Coronaviridae_4	Human coronavirus OC43 isolate 2151A/2010, complete genome	Coronaviridae	Betacoronavirus	Betacoronavirus 1	oronasopharynx	2010-07-15	China	30713	ssRNA(+)	FALSE	FALSE	Homo sapiens
KF923896.1	Coronaviridae_4	Human coronavirus OC43 isolate 3074A/2012, complete genome	Coronaviridae	Betacoronavirus	Betacoronavirus 1	oronasopharynx	2012-02-15	China	30737	ssRNA(+)	FALSE	FALSE	Homo sapiens
KF923897.1	Coronaviridae_4	Human coronavirus OC43 isolate 3269A/2012, complete genome	Coronaviridae	Betacoronavirus	Betacoronavirus 1	oronasopharynx	2012-06-15	China	30711	ssRNA(+)	FALSE	FALSE	Homo sapiens
KF923898.1	Coronaviridae_4	Human coronavirus OC43 isolate 3184A/2012, complete genome	Coronaviridae	Betacoronavirus	Betacoronavirus 1	oronasopharynx	2012-03-15	China	30716	ssRNA(+)	FALSE	FALSE	Homo sapiens
KF923899.1	Coronaviridae_4	Human coronavirus OC43 isolate 3582/2006, complete genome	Coronaviridae	Betacoronavirus	Betacoronavirus 1	oronasopharynx	2006-09-15	China	30722	ssRNA(+)	FALSE	FALSE	Homo sapiens
KF923900.1	Coronaviridae_4	Human coronavirus OC43 isolate 3647/2006, complete genome	Coronaviridae	Betacoronavirus	Betacoronavirus 1	oronasopharynx	2006-10-15	China	30722	ssRNA(+)	FALSE	FALSE	Homo sapiens
KF923901.1	Coronaviridae_4	Human coronavirus OC43 isolate 5472/2007, complete genome	Coronaviridae	Betacoronavirus	Betacoronavirus 1	oronasopharynx	2007-06-15	China	30713	ssRNA(+)	FALSE	FALSE	Homo sapiens
KF923902.1	Coronaviridae_4	Human coronavirus OC43 isolate 12689/2012, complete genome	Coronaviridae	Betacoronavirus	Betacoronavirus 1	oronasopharynx	2012-05-15	China	30713	ssRNA(+)	FALSE	FALSE	Homo sapiens
KF923905.1	Coronaviridae_4	Human coronavirus OC43 isolate 229/2005, complete genome	Coronaviridae	Betacoronavirus	Betacoronavirus 1	oronasopharynx	2005-06-15	China	30722	ssRNA(+)	FALSE	FALSE	Homo sapiens
KF923918.1	Coronaviridae_4	Human coronavirus OC43 isolate 10108/2010, complete genome	Coronaviridae	Betacoronavirus	Betacoronavirus 1	oronasopharynx	2010-05-15	China	30713	ssRNA(+)	FALSE	FALSE	Homo sapiens
KF923919.1	Coronaviridae_4	Human coronavirus OC43 isolate 5595/2007, complete genome	Coronaviridae	Betacoronavirus	Betacoronavirus 1	oronasopharynx	2007-07-15	China	30713	ssRNA(+)	FALSE	FALSE	Homo sapiens
KF923922.1	Coronaviridae_4	Human coronavirus OC43 isolate 8164/2009, complete genome	Coronaviridae	Betacoronavirus	Betacoronavirus 1	oronasopharynx	2009-03-15	China	30713	ssRNA(+)	FALSE	FALSE	Homo sapiens
KF923923.1	Coronaviridae_4	Human coronavirus OC43 isolate 892A/2008, complete genome	Coronaviridae	Betacoronavirus	Betacoronavirus 1	oronasopharynx	2008-10-15	China	30713	ssRNA(+)	FALSE	FALSE	Homo sapiens
KF923925.1	Coronaviridae_4	Human coronavirus OC43 isolate 10574/2010, complete genome	Coronaviridae	Betacoronavirus	Betacoronavirus 1	oronasopharynx	2010-09-15	China	30713	ssRNA(+)	FALSE	FALSE	Homo sapiens
KF931628.1	Coronaviridae_6	Infectious bronchitis virus isolate VicS-del, complete genome	Coronaviridae	Gammacoronavirus	Avian coronavirus	allantoic fluid	2012-08-06	Australia	27567	ssRNA(+)	FALSE	FALSE	Gallus gallus
KF958702.1	Coronaviridae_26	Middle East respiratory syndrome coronavirus isolate MERS-CoV-Jeddah-human-1, complete genome	Coronaviridae	Betacoronavirus	Middle East respiratory syndrome-related coronavirus		2013-11-05	Saudi Arabia	29851	ssRNA(+)	FALSE	FALSE	Homo sapiens
KF961221.1	Coronaviridae_26	Middle East respiratory syndrome coronavirus isolate Qatar3, complete genome	Coronaviridae	Betacoronavirus	Middle East respiratory syndrome-related coronavirus		2013-10-13	Qatar	30090	ssRNA(+)	FALSE	FALSE	Homo sapiens
KF961222.1	Coronaviridae_26	Middle East respiratory syndrome coronavirus isolate Qatar4, complete genome	Coronaviridae	Betacoronavirus	Middle East respiratory syndrome-related coronavirus		2013-10-17	Qatar	30086	ssRNA(+)	FALSE	FALSE	Homo sapiens
KJ020932.1	Coronaviridae_17	Porcine epidemic diarrhea virus isolate CHYJ130330, complete genome	Coronaviridae	Alphacoronavirus	Porcine epidemic diarrhea virus	feces	2013-03-15	China	28038	ssRNA(+)	FALSE	FALSE	Sus scrofa
KJ128295.1	Coronaviridae_6	Infectious bronchitis virus isolate CK/CH/SD/121220, complete genome	Coronaviridae	Gammacoronavirus	Avian coronavirus		2012-12-20	China	27666	ssRNA(+)	FALSE	FALSE	Gallus gallus
KJ135013.1	Coronaviridae_6	Infectious bronchitis virus isolate IBVUkr27-11, complete genome	Coronaviridae	Gammacoronavirus	Avian coronavirus		2011-10-15	Ukraine	27577	ssRNA(+)	FALSE	FALSE	Gallus gallus
KJ156866.1	Coronaviridae_26	Middle East respiratory syndrome coronavirus isolate Al-Hasa_25_2013, complete genome	Coronaviridae	Betacoronavirus	Middle East respiratory syndrome-related coronavirus		2013-05-02	Saudi Arabia	30054	ssRNA(+)	FALSE	FALSE	Homo sapiens
KJ156869.1	Coronaviridae_26	Middle East respiratory syndrome coronavirus isolate Riyadh_9_2013, complete genome	Coronaviridae	Betacoronavirus	Middle East respiratory syndrome-related coronavirus		2013-07-17	Saudi Arabia	30055	ssRNA(+)	FALSE	FALSE	Homo sapiens
KJ156874.1	Coronaviridae_26	Middle East respiratory syndrome coronavirus isolate Hafr-Al-Batin_6_2013, complete genome	Coronaviridae	Betacoronavirus	Middle East respiratory syndrome-related coronavirus		2013-08-28	Saudi Arabia	30055	ssRNA(+)	FALSE	FALSE	Homo sapiens
KJ156881.1	Coronaviridae_26	Middle East respiratory syndrome coronavirus isolate Wadi-Ad-Dawasir_1_2013, complete genome	Coronaviridae	Betacoronavirus	Middle East respiratory syndrome-related coronavirus		2013-06-12	Saudi Arabia	30055	ssRNA(+)	FALSE	FALSE	Homo sapiens
KJ156910.1	Coronaviridae_26	Middle East respiratory syndrome coronavirus isolate Hafr-Al-Batin_2_2013, complete genome	Coronaviridae	Betacoronavirus	Middle East respiratory syndrome-related coronavirus		2013-08-05	Saudi Arabia	30055	ssRNA(+)	FALSE	FALSE	Homo sapiens
KJ156934.1	Coronaviridae_26	Middle East respiratory syndrome coronavirus isolate Riyadh_14_2013, complete genome	Coronaviridae	Betacoronavirus	Middle East respiratory syndrome-related coronavirus		2013-08-15	Saudi Arabia	30055	ssRNA(+)	FALSE	FALSE	Homo sapiens
KJ156944.1	Coronaviridae_26	Middle East respiratory syndrome coronavirus isolate Riyadh_5_2013, complete genome	Coronaviridae	Betacoronavirus	Middle East respiratory syndrome-related coronavirus		2013-07-02	Saudi Arabia	30055	ssRNA(+)	FALSE	FALSE	Homo sapiens
KJ156952.1	Coronaviridae_26	Middle East respiratory syndrome coronavirus isolate Riyadh_4_2013, complete genome	Coronaviridae	Betacoronavirus	Middle East respiratory syndrome-related coronavirus		2013-03-01	Saudi Arabia	30054	ssRNA(+)	FALSE	FALSE	Homo sapiens
KJ158152.1	Coronaviridae_17	Porcine epidemic diarrhea virus strain AH-M, complete genome	Coronaviridae	Alphacoronavirus	Porcine epidemic diarrhea virus		2011-10-20	China	27953	ssRNA(+)	FALSE	FALSE
KJ184549.1	Coronaviridae_17	Porcine epidemic diarrhea virus strain USA/KS/2013, complete genome	Coronaviridae	Alphacoronavirus	Porcine epidemic diarrhea virus		2013-06-01	USA	28038	ssRNA(+)	FALSE	FALSE	Sus scrofa
KJ196348.1	Coronaviridae_17	Porcine epidemic diarrhea virus strain SHQP/YM/2013, complete genome	Coronaviridae	Alphacoronavirus	Porcine epidemic diarrhea virus		2013-02-05	China	28038	ssRNA(+)	FALSE	FALSE	Sus scrofa
KJ361500.1	Coronaviridae_26	Middle East respiratory syndrome coronavirus isolate Hu-France (UAE) - FRA1_1627-2013_BAL_Sanger, complete genome	Coronaviridae	Betacoronavirus	Middle East respiratory syndrome-related coronavirus	lung	2013-04-26	France	29267	ssRNA(+)	FALSE	FALSE	Homo sapiens
KJ361501.1	Coronaviridae_26	Middle East respiratory syndrome coronavirus isolate Hu-France - FRA2_130569-2013_IS_HTS, complete genome	Coronaviridae	Betacoronavirus	Middle East respiratory syndrome-related coronavirus	oronasopharynx	2013-05-07	France	29880	ssRNA(+)	FALSE	FALSE	Homo sapiens
KJ361503.1	Coronaviridae_26	Middle East respiratory syndrome coronavirus isolate Hu-France - FRA2_130569-2013_Isolate_Sanger, complete genome	Coronaviridae	Betacoronavirus	Middle East respiratory syndrome-related coronavirus		2013-05-07	France	30040	ssRNA(+)	FALSE	FALSE	Homo sapiens
KJ399978.1	Coronaviridae_17	Porcine epidemic diarrhea virus strain OH851, complete genome	Coronaviridae	Alphacoronavirus	Porcine epidemic diarrhea virus		2014-01-15	USA	28029	ssRNA(+)	FALSE	FALSE	Sus scrofa
KJ408801.1	Coronaviridae_17	Porcine epidemic diarrhea virus strain OH1414, complete genome	Coronaviridae	Alphacoronavirus	Porcine epidemic diarrhea virus		2014-01-23	USA	28038	ssRNA(+)	FALSE	FALSE	Sus scrofa
KJ425485.1	Coronaviridae_6	Infectious bronchitis virus strain ck/CH/LDL/110931, complete genome	Coronaviridae	Gammacoronavirus	Avian coronavirus		2011-09-17	China	27594	ssRNA(+)	FALSE	FALSE	Gallus gallus
KJ425486.1	Coronaviridae_6	Infectious bronchitis virus strain ck/CH/LDL/120557, complete genome	Coronaviridae	Gammacoronavirus	Avian coronavirus		2012-05-23	China	27644	ssRNA(+)	FALSE	FALSE	Gallus gallus
KJ425487.1	Coronaviridae_6	Infectious bronchitis virus strain ck/CH/LHB/110526, complete genome	Coronaviridae	Gammacoronavirus	Avian coronavirus		2011-05-26	China	27642	ssRNA(+)	FALSE	FALSE	Gallus gallus
KJ425488.1	Coronaviridae_6	Infectious bronchitis virus strain ck/CH/LHB/110825, complete genome	Coronaviridae	Gammacoronavirus	Avian coronavirus		2011-08-25	China	27642	ssRNA(+)	FALSE	FALSE	Gallus gallus
KJ425489.1	Coronaviridae_6	Infectious bronchitis virus strain ck/CH/LHB/111172, complete genome	Coronaviridae	Gammacoronavirus	Avian coronavirus		2011-11-18	China	27642	ssRNA(+)	FALSE	FALSE	Gallus gallus
KJ425490.1	Coronaviridae_6	Infectious bronchitis virus strain ck/CH/LHB/111232, complete genome	Coronaviridae	Gammacoronavirus	Avian coronavirus		2011-12-21	China	27641	ssRNA(+)	FALSE	FALSE	Gallus gallus
KJ425491.1	Coronaviridae_6	Infectious bronchitis virus strain ck/CH/LHB/111268, complete genome	Coronaviridae	Gammacoronavirus	Avian coronavirus		2011-12-18	China	27642	ssRNA(+)	FALSE	FALSE	Gallus gallus
KJ425492.1	Coronaviridae_6	Infectious bronchitis virus strain ck/CH/LHB/120403, complete genome	Coronaviridae	Gammacoronavirus	Avian coronavirus		2012-04-03	China	27642	ssRNA(+)	FALSE	FALSE	Gallus gallus
KJ425493.1	Coronaviridae_6	Infectious bronchitis virus strain ck/CH/LHB/120749, complete genome	Coronaviridae	Gammacoronavirus	Avian coronavirus		2012-07-21	China	27642	ssRNA(+)	FALSE	FALSE	Gallus gallus
KJ425494.1	Coronaviridae_6	Infectious bronchitis virus strain ck/CH/LHB/121024, complete genome	Coronaviridae	Gammacoronavirus	Avian coronavirus		2012-10-24	China	27641	ssRNA(+)	FALSE	FALSE	Gallus gallus
KJ425495.1	Coronaviridae_6	Infectious bronchitis virus strain ck/CH/LHB/121040, complete genome	Coronaviridae	Gammacoronavirus	Avian coronavirus		2012-10-26	China	27642	ssRNA(+)	FALSE	FALSE	Gallus gallus
KJ425496.1	Coronaviridae_6	Infectious bronchitis virus strain ck/CH/LHB/130573, complete genome	Coronaviridae	Gammacoronavirus	Avian coronavirus		2013-05-25	China	27606	ssRNA(+)	FALSE	FALSE	Gallus gallus
KJ425497.1	Coronaviridae_6	Infectious bronchitis virus strain ck/CH/LHB/130598, complete genome	Coronaviridae	Gammacoronavirus	Avian coronavirus		2013-05-24	China	27621	ssRNA(+)	FALSE	FALSE	Gallus gallus
KJ425498.1	Coronaviridae_6	Infectious bronchitis virus strain ck/CH/LHB/130642, complete genome	Coronaviridae	Gammacoronavirus	Avian coronavirus		2013-06-18	China	27642	ssRNA(+)	FALSE	FALSE	Gallus gallus
KJ425499.1	Coronaviridae_6	Infectious bronchitis virus strain ck/CH/LHB/131118, complete genome	Coronaviridae	Gammacoronavirus	Avian coronavirus		2013-11-18	China	27642	ssRNA(+)	FALSE	FALSE	Gallus gallus
KJ425500.1	Coronaviridae_6	Infectious bronchitis virus strain ck/CH/LHB/131132, complete genome	Coronaviridae	Gammacoronavirus	Avian coronavirus		2013-11-21	China	27644	ssRNA(+)	FALSE	FALSE	Gallus gallus
KJ425501.1	Coronaviridae_6	Infectious bronchitis virus strain ck/CH/LHB/131142, complete genome	Coronaviridae	Gammacoronavirus	Avian coronavirus		2013-11-26	China	27642	ssRNA(+)	FALSE	FALSE	Gallus gallus
KJ425502.1	Coronaviridae_6	Infectious bronchitis virus strain ck/CH/LHB/131143, complete genome	Coronaviridae	Gammacoronavirus	Avian coronavirus		2013-11-26	China	27642	ssRNA(+)	FALSE	FALSE	Gallus gallus
KJ425503.1	Coronaviridae_6	Infectious bronchitis virus strain ck/CH/LHLJ/090908, complete genome	Coronaviridae	Gammacoronavirus	Avian coronavirus		2009-09-08	China	27609	ssRNA(+)	FALSE	FALSE	Gallus gallus
KJ425504.1	Coronaviridae_6	Infectious bronchitis virus strain ck/CH/LHLJ/091205, complete genome	Coronaviridae	Gammacoronavirus	Avian coronavirus		2009-12-05	China	27485	ssRNA(+)	FALSE	FALSE	Gallus gallus
KJ425505.1	Coronaviridae_6	Infectious bronchitis virus strain ck/CH/LHLJ/110310, complete genome	Coronaviridae	Gammacoronavirus	Avian coronavirus		2011-03-10	China	27642	ssRNA(+)	FALSE	FALSE	Gallus gallus
KJ425506.1	Coronaviridae_6	Infectious bronchitis virus strain ck/CH/LHLJ/111050, complete genome	Coronaviridae	Gammacoronavirus	Avian coronavirus		2011-10-22	China	27642	ssRNA(+)	FALSE	FALSE	Gallus gallus
KJ425507.1	Coronaviridae_6	Infectious bronchitis virus strain ck/CH/LHLJ/131216, complete genome	Coronaviridae	Gammacoronavirus	Avian coronavirus		2013-12-16	China	27642	ssRNA(+)	FALSE	FALSE	Gallus gallus
KJ425508.1	Coronaviridae_6	Infectious bronchitis virus strain ck/CH/LHN/090909, complete genome	Coronaviridae	Gammacoronavirus	Avian coronavirus		2009-09-09	China	27641	ssRNA(+)	FALSE	FALSE	Gallus gallus
KJ425509.1	Coronaviridae_6	Infectious bronchitis virus strain ck/CH/LJL/121059, complete genome	Coronaviridae	Gammacoronavirus	Avian coronavirus		2012-10-23	China	27642	ssRNA(+)	FALSE	FALSE	Gallus gallus
KJ425510.1	Coronaviridae_6	Infectious bronchitis virus strain ck/CH/LSD/110505, complete genome	Coronaviridae	Gammacoronavirus	Avian coronavirus		2011-05-05	China	27642	ssRNA(+)	FALSE	FALSE	Gallus gallus
KJ425511.1	Coronaviridae_6	Infectious bronchitis virus strain ck/CH/LSD/110529, complete genome	Coronaviridae	Gammacoronavirus	Avian coronavirus		2011-05-29	China	27642	ssRNA(+)	FALSE	FALSE	Gallus gallus
KJ425512.1	Coronaviridae_6	Infectious bronchitis virus strain ck/CH/LSD/110726, complete genome	Coronaviridae	Gammacoronavirus	Avian coronavirus		2011-07-26	China	27642	ssRNA(+)	FALSE	FALSE	Gallus gallus
KJ435283.1	Coronaviridae_6	Infectious bronchitis virus strain ck/CH/LSD/111219, complete genome	Coronaviridae	Gammacoronavirus	Avian coronavirus		2011-12-19	China	27666	ssRNA(+)	FALSE	FALSE	Gallus gallus
KJ435284.1	Coronaviridae_6	Infectious bronchitis virus strain ck/CH/LSD/111241, complete genome	Coronaviridae	Gammacoronavirus	Avian coronavirus		2011-12-23	China	27616	ssRNA(+)	FALSE	FALSE	Gallus gallus
KJ435285.1	Coronaviridae_6	Infectious bronchitis virus strain ck/CH/LSD/121228, complete genome	Coronaviridae	Gammacoronavirus	Avian coronavirus		2012-12-28	China	27643	ssRNA(+)	FALSE	FALSE	Gallus gallus
KJ435286.1	Coronaviridae_6	Infectious bronchitis virus strain ck/CH/LSD/1112150, complete genome	Coronaviridae	Gammacoronavirus	Avian coronavirus		2011-12-27	China	27485	ssRNA(+)	FALSE	FALSE	Gallus gallus
KJ462462.1	Coronaviridae_18	Porcine coronavirus HKU15 strain OH1987, complete genome	Coronaviridae	Deltacoronavirus	Coronavirus HKU15		2014-01-31	USA	25422	ssRNA(+)	FALSE	FALSE	Sus scrofa
KJ473795.1	Coronaviridae_31	BtMf-AlphaCoV/AH2011, complete genome	Coronaviridae	Alphacoronavirus	Miniopterus bat coronavirus 1		2011-06-01	China	28310	ssRNA(+)	FALSE	FALSE	Miniopterus fuliginosus
KJ473796.1	Coronaviridae_31	BtMf-AlphaCoV/JX2012, complete genome	Coronaviridae	Alphacoronavirus	Miniopterus bat coronavirus 1		2012-06-01	China	28311	ssRNA(+)	FALSE	FALSE	Miniopterus fuliginosus
KJ473797.1	Coronaviridae_32	BtMf-AlphaCoV/GD2012, complete genome	Coronaviridae	Alphacoronavirus	Miniopterus bat coronavirus HKU8		2012-06-01	China	28758	ssRNA(+)	FALSE	FALSE	Miniopterus fuliginosus
KJ473798.1	Coronaviridae_32	BtMf-AlphaCoV/HuB2013, complete genome	Coronaviridae	Alphacoronavirus	Miniopterus bat coronavirus HKU8		2013-06-01	China	28755	ssRNA(+)	FALSE	FALSE	Miniopterus fuliginosus
KJ473799.1	Coronaviridae_32	BtMf-AlphaCoV/FJ2012, complete genome	Coronaviridae	Alphacoronavirus	Miniopterus bat coronavirus HKU8		2012-06-01	China	28765	ssRNA(+)	FALSE	FALSE	Miniopterus fuliginosus
KJ473800.1	Coronaviridae_32	BtMf-AlphaCoV/HeN2013, complete genome	Coronaviridae	Alphacoronavirus	Miniopterus bat coronavirus HKU8		2013-06-01	China	28735	ssRNA(+)	FALSE	FALSE	Miniopterus fuliginosus
KJ473806.1	Coronaviridae_33	BtMr-AlphaCoV/SAX2011, complete genome	Coronaviridae	Alphacoronavirus	Myotis ricketti alphacoronavirus Sax-2011		2011-06-01	China	27935	ssRNA(+)	FALSE	FALSE	Myotis ricketti
KJ473807.1	Coronaviridae_34	BtRf-AlphaCoV/HuB2013, complete genome	Coronaviridae	Alphacoronavirus	Rhinolophus ferrumequinum alphacoronavirus HuB-2013		2013-06-01	China	27608	ssRNA(+)	FALSE	FALSE	Rhinolophus ferrumequinum
KJ473808.1	Coronaviridae_35	BtRf-AlphaCoV/YN2012, complete genome	Coronaviridae	Alphacoronavirus	BtRf-AlphaCoV/YN2012		2012-06-01	China	26975	ssRNA(+)	FALSE	FALSE	Rhinolophus ferrumequinum
KJ473809.1	Coronaviridae_36	BtNv-AlphaCoV/SC2013, complete genome	Coronaviridae	Alphacoronavirus	Nyctalus velutinus alphacoronavirus SC-2013		2013-06-01	China	27783	ssRNA(+)	FALSE	FALSE	Nyctalus velutinus
KJ473810.1	Coronaviridae_34	BtMs-AlphaCoV/GS2013, complete genome	Coronaviridae	Alphacoronavirus	Rhinolophus ferrumequinum alphacoronavirus HuB-2013		2013-06-01	China	27576	ssRNA(+)	FALSE	FALSE	Myotis sp.
KJ473811.1	Coronaviridae_3	BtRf-BetaCoV/JL2012, complete genome	Coronaviridae	Betacoronavirus	Severe acute respiratory syndrome-related coronavirus		2012-06-01	China	29037	ssRNA(+)	FALSE	FALSE	Rhinolophus ferrumequinum
KJ473812.1	Coronaviridae_3	BtRf-BetaCoV/HeB2013, complete genome	Coronaviridae	Betacoronavirus	Severe acute respiratory syndrome-related coronavirus		2013-06-01	China	29443	ssRNA(+)	FALSE	FALSE	Rhinolophus ferrumequinum
KJ473813.1	Coronaviridae_3	BtRf-BetaCoV/SX2013, complete genome	Coronaviridae	Betacoronavirus	Severe acute respiratory syndrome-related coronavirus		2013-06-01	China	29461	ssRNA(+)	FALSE	FALSE	Rhinolophus ferrumequinum
KJ473814.1	Coronaviridae_3	BtRs-BetaCoV/HuB2013, complete genome	Coronaviridae	Betacoronavirus	Severe acute respiratory syndrome-related coronavirus		2013-06-01	China	29658	ssRNA(+)	FALSE	FALSE	Rhinolophus sinicus
KJ473815.1	Coronaviridae_3	BtRs-BetaCoV/GX2013, complete genome	Coronaviridae	Betacoronavirus	Severe acute respiratory syndrome-related coronavirus		2013-06-01	China	29161	ssRNA(+)	FALSE	FALSE	Rhinolophus sinicus
KJ473816.1	Coronaviridae_3	BtRs-BetaCoV/YN2013, complete genome	Coronaviridae	Betacoronavirus	Severe acute respiratory syndrome-related coronavirus		2013-06-01	China	29142	ssRNA(+)	FALSE	FALSE	Rhinolophus sinicus
KJ473820.1	Coronaviridae_37	BtPa-BetaCoV/GD2013, complete genome	Coronaviridae	Betacoronavirus	Pipistrellus bat coronavirus HKU5		2013-06-01	China	30480	ssRNA(+)	FALSE	FALSE	Pipistrellus abramus
KJ473822.1	Coronaviridae_38	BtTp-BetaCoV/GX2012, complete genome	Coronaviridae	Betacoronavirus	Tylonycteris bat coronavirus HKU4		2012-06-01	China	30247	ssRNA(+)	FALSE	FALSE	Tylonycteris pachypus
KJ477102.1	Coronaviridae_26	Middle East respiratory syndrome coronavirus, complete genome	Coronaviridae	Betacoronavirus	Middle East respiratory syndrome-related coronavirus		2013-06-01	Egypt	29908	ssRNA(+)	FALSE	FALSE	Camelus dromedarius
KJ477103.2	Coronaviridae_26	Middle East respiratory syndrome-related coronavirus isolate NRCE-HKU270, complete genome	Coronaviridae	Betacoronavirus	Middle East respiratory syndrome-related coronavirus		2013-06-01	Egypt	30101	ssRNA(+)	FALSE	FALSE	Camelus dromedarius
KJ481931.1	Coronaviridae_18	Deltacoronavirus PDCoV/USA/Illinois121/2014 from USA, complete genome	Coronaviridae	Deltacoronavirus	Coronavirus HKU15		2014-01-04	USA	25406	ssRNA(+)	FALSE	FALSE	Sus scrofa
KJ526096.1	Coronaviridae_17	Porcine epidemic diarrhea virus isolate CH/JX-2/2013, complete genome	Coronaviridae	Alphacoronavirus	Porcine epidemic diarrhea virus		2013-04-15	China	28050	ssRNA(+)	FALSE	FALSE	Sus scrofa
KJ556336.1	Coronaviridae_26	Middle East respiratory syndrome coronavirus isolate Jeddah_1_2013, complete genome	Coronaviridae	Betacoronavirus	Middle East respiratory syndrome-related coronavirus		2013-11-06	Saudi Arabia	29890	ssRNA(+)	FALSE	FALSE	Homo sapiens
KJ567050.1	Coronaviridae_18	Porcine deltacoronavirus 8734/USA-IA/2014, complete genome	Coronaviridae	Deltacoronavirus	Coronavirus HKU15		2014-02-20	USA	25422	ssRNA(+)	FALSE	FALSE	Sus scrofa
KJ569769.1	Coronaviridae_18	Porcine coronavirus HKU15 strain IN2847, complete genome	Coronaviridae	Deltacoronavirus	Coronavirus HKU15		2014-02-13	USA	25422	ssRNA(+)	FALSE	FALSE	Sus scrofa
KJ584355.1	Coronaviridae_18	Porcine coronavirus HKU15 strain IL2768, complete genome	Coronaviridae	Deltacoronavirus	Coronavirus HKU15		2014-02-12	USA	25422	ssRNA(+)	FALSE	FALSE	Sus scrofa
KJ584356.1	Coronaviridae_18	Porcine coronavirus HKU15 strain SD3424, complete genome	Coronaviridae	Deltacoronavirus	Coronavirus HKU15		2014-02-20	USA	25422	ssRNA(+)	FALSE	FALSE	Sus scrofa
KJ584357.1	Coronaviridae_18	Porcine coronavirus HKU15 strain KY4813, complete genome	Coronaviridae	Deltacoronavirus	Coronavirus HKU15		2014-03-07	USA	25422	ssRNA(+)	FALSE	FALSE	Sus scrofa
KJ584358.1	Coronaviridae_18	Porcine coronavirus HKU15 strain PA3148, complete genome	Coronaviridae	Deltacoronavirus	Coronavirus HKU15		2014-02-18	USA	25422	ssRNA(+)	FALSE	FALSE	Sus scrofa
KJ584359.1	Coronaviridae_18	Porcine coronavirus HKU15 strain NE3579, complete genome	Coronaviridae	Deltacoronavirus	Coronavirus HKU15		2014-02-21	USA	25422	ssRNA(+)	FALSE	FALSE	Sus scrofa
KJ584361.1	Coronaviridae_17	Porcine epidemic diarrhea virus strain OH15962, complete genome	Coronaviridae	Alphacoronavirus	Porcine epidemic diarrhea virus		2013-06-14	USA	28038	ssRNA(+)	FALSE	FALSE	Sus scrofa
KJ588062.1	Coronaviridae_17	Porcine epidemic diarrhea virus isolate KUIDL-PED-2014-007, complete genome	Coronaviridae	Alphacoronavirus	Porcine epidemic diarrhea virus		2014-02-15	South Korea	27759	ssRNA(+)	FALSE	FALSE	Sus scrofa
KJ588063.1	Coronaviridae_17	Porcine epidemic diarrhea virus isolate KUIDL-PED-2014-002, complete genome	Coronaviridae	Alphacoronavirus	Porcine epidemic diarrhea virus		2014-02-15	South Korea	27759	ssRNA(+)	FALSE	FALSE	Sus scrofa
KJ588064.1	Coronaviridae_17	Porcine epidemic diarrhea virus isolate KUIDL-PED-2014-001, complete genome	Coronaviridae	Alphacoronavirus	Porcine epidemic diarrhea virus		2014-02-15	South Korea	27759	ssRNA(+)	FALSE	FALSE	Sus scrofa
KJ601777.1	Coronaviridae_18	Deltacoronavirus PDCoV/USA/Illinois133/2014 from USA, complete genome	Coronaviridae	Deltacoronavirus	Coronavirus HKU15		2014-01-08	USA	25408	ssRNA(+)	FALSE	FALSE	Sus scrofa
KJ601778.1	Coronaviridae_18	Deltacoronavirus PDCoV/USA/Illinois134/2014 from USA, complete genome	Coronaviridae	Deltacoronavirus	Coronavirus HKU15		2014-01-08	USA	25404	ssRNA(+)	FALSE	FALSE	Sus scrofa
KJ601779.1	Coronaviridae_18	Deltacoronavirus PDCoV/USA/Illinois136/2014 from USA, complete genome	Coronaviridae	Deltacoronavirus	Coronavirus HKU15		2014-01-11	USA	25404	ssRNA(+)	FALSE	FALSE	Sus scrofa
KJ601780.1	Coronaviridae_18	Deltacoronavirus PDCoV/USA/Ohio137/2014 from USA, complete genome	Coronaviridae	Deltacoronavirus	Coronavirus HKU15		2014-01-26	USA	25404	ssRNA(+)	FALSE	FALSE	Sus scrofa
KJ620016.1	Coronaviridae_18	Porcine coronavirus HKU15 strain MI6148, complete genome	Coronaviridae	Deltacoronavirus	Coronavirus HKU15		2014-03-18	USA	25422	ssRNA(+)	FALSE	FALSE	Sus scrofa
KJ623926.1	Coronaviridae_17	Porcine epidemic diarrhea virus strain K14JB01, complete genome	Coronaviridae	Alphacoronavirus	Porcine epidemic diarrhea virus		2014-06-01	South Korea	28038	ssRNA(+)	FALSE	FALSE	Sus scrofa
KJ645635.1	Coronaviridae_17	Porcine epidemic diarrhea virus strain USA/Indiana12.83/2013, complete genome	Coronaviridae	Alphacoronavirus	Porcine epidemic diarrhea virus	abdominal cavity	2013-06-08	USA	27989	ssRNA(+)	FALSE	FALSE	Sus scrofa
KJ645636.1	Coronaviridae_17	Porcine epidemic diarrhea virus strain USA/Iowa28/2013, complete genome	Coronaviridae	Alphacoronavirus	Porcine epidemic diarrhea virus	abdominal cavity	2013-07-14	USA	27998	ssRNA(+)	FALSE	FALSE	Sus scrofa
KJ645637.1	Coronaviridae_17	Porcine epidemic diarrhea virus strain USA/Kansas29/2013, complete genome	Coronaviridae	Alphacoronavirus	Porcine epidemic diarrhea virus	feces	2013-07-15	USA	27998	ssRNA(+)	FALSE	FALSE	Sus scrofa
KJ645638.1	Coronaviridae_17	Porcine epidemic diarrhea virus strain USA/Colorado30/2013, complete genome	Coronaviridae	Alphacoronavirus	Porcine epidemic diarrhea virus	abdominal cavity	2013-07-22	USA	27998	ssRNA(+)	FALSE	FALSE	Sus scrofa
KJ645639.1	Coronaviridae_17	Porcine epidemic diarrhea virus strain USA/Texas31/2013, complete genome	Coronaviridae	Alphacoronavirus	Porcine epidemic diarrhea virus	feces	2013-07-22	USA	27998	ssRNA(+)	FALSE	FALSE	Sus scrofa
KJ645640.1	Coronaviridae_17	Porcine epidemic diarrhea virus strain USA/Oklahoma32/2013, complete genome	Coronaviridae	Alphacoronavirus	Porcine epidemic diarrhea virus	feces	2013-07-24	USA	27998	ssRNA(+)	FALSE	FALSE	Sus scrofa
KJ645641.1	Coronaviridae_17	Porcine epidemic diarrhea virus strain USA/Indiana34/2013, complete genome	Coronaviridae	Alphacoronavirus	Porcine epidemic diarrhea virus	feces	2013-08-21	USA	27998	ssRNA(+)	FALSE	FALSE	Sus scrofa
KJ645642.1	Coronaviridae_17	Porcine epidemic diarrhea virus strain USA/Oklahoma35/2013, complete genome	Coronaviridae	Alphacoronavirus	Porcine epidemic diarrhea virus	feces	2013-08-26	USA	27998	ssRNA(+)	FALSE	FALSE	Sus scrofa
KJ645643.1	Coronaviridae_17	Porcine epidemic diarrhea virus strain USA/Kansas36/2013, complete genome	Coronaviridae	Alphacoronavirus	Porcine epidemic diarrhea virus	feces	2013-09-01	USA	27998	ssRNA(+)	FALSE	FALSE	Sus scrofa
KJ645644.1	Coronaviridae_17	Porcine epidemic diarrhea virus strain USA/Oklahoma38/2013, complete genome	Coronaviridae	Alphacoronavirus	Porcine epidemic diarrhea virus	feces	2013-09-07	USA	27998	ssRNA(+)	FALSE	FALSE	Sus scrofa
KJ645645.1	Coronaviridae_17	Porcine epidemic diarrhea virus strain USA/Texas39/2013, complete genome	Coronaviridae	Alphacoronavirus	Porcine epidemic diarrhea virus	abdominal cavity	2013-09-28	USA	27998	ssRNA(+)	FALSE	FALSE	Sus scrofa
KJ645646.1	Coronaviridae_17	Porcine epidemic diarrhea virus strain USA/NorthCarolina40/2013, complete genome	Coronaviridae	Alphacoronavirus	Porcine epidemic diarrhea virus	feces	2013-10-05	USA	27988	ssRNA(+)	FALSE	FALSE	Sus scrofa
KJ645647.1	Coronaviridae_17	Porcine epidemic diarrhea virus strain USA/Minnesota41/2013, complete genome	Coronaviridae	Alphacoronavirus	Porcine epidemic diarrhea virus	feces	2013-10-14	USA	27998	ssRNA(+)	FALSE	FALSE	Sus scrofa
KJ645648.1	Coronaviridae_17	Porcine epidemic diarrhea virus strain USA/Minnesota42/2013, complete genome	Coronaviridae	Alphacoronavirus	Porcine epidemic diarrhea virus	feces	2013-10-20	USA	27998	ssRNA(+)	FALSE	FALSE	Sus scrofa
KJ645649.1	Coronaviridae_17	Porcine epidemic diarrhea virus strain USA/Iowa23.57/2013, complete genome	Coronaviridae	Alphacoronavirus	Porcine epidemic diarrhea virus	abdominal cavity	2013-10-20	USA	27989	ssRNA(+)	FALSE	FALSE	Sus scrofa
KJ645650.1	Coronaviridae_17	Porcine epidemic diarrhea virus strain USA/Kansas46/2013, complete genome	Coronaviridae	Alphacoronavirus	Porcine epidemic diarrhea virus	feces	2013-10-23	USA	27998	ssRNA(+)	FALSE	FALSE	Sus scrofa
KJ645651.1	Coronaviridae_17	Porcine epidemic diarrhea virus strain USA/Colorado47/2013, complete genome	Coronaviridae	Alphacoronavirus	Porcine epidemic diarrhea virus	feces	2013-10-23	USA	27998	ssRNA(+)	FALSE	FALSE	Sus scrofa
KJ645652.1	Coronaviridae_17	Porcine epidemic diarrhea virus strain USA/Minnesota54/2013, complete genome	Coronaviridae	Alphacoronavirus	Porcine epidemic diarrhea virus	feces	2013-11-02	USA	27998	ssRNA(+)	FALSE	FALSE	Sus scrofa
KJ645653.1	Coronaviridae_17	Porcine epidemic diarrhea virus strain USA/Wisconsin55/2013, complete genome	Coronaviridae	Alphacoronavirus	Porcine epidemic diarrhea virus	feces	2013-11-03	USA	27998	ssRNA(+)	FALSE	FALSE	Sus scrofa
KJ645654.1	Coronaviridae_17	Porcine epidemic diarrhea virus strain USA/Tennesse56/2013, complete genome	Coronaviridae	Alphacoronavirus	Porcine epidemic diarrhea virus	abdominal cavity	2013-11-04	USA	27998	ssRNA(+)	FALSE	FALSE	Sus scrofa
KJ645655.1	Coronaviridae_17	Porcine epidemic diarrhea virus strain USA/Minnesota58/2013, complete genome	Coronaviridae	Alphacoronavirus	Porcine epidemic diarrhea virus	feces	2013-11-05	USA	27989	ssRNA(+)	FALSE	FALSE	Sus scrofa
KJ645656.1	Coronaviridae_17	Porcine epidemic diarrhea virus strain USA/Minnesota59/2013, complete genome	Coronaviridae	Alphacoronavirus	Porcine epidemic diarrhea virus	feces	2013-11-11	USA	27998	ssRNA(+)	FALSE	FALSE	Sus scrofa
KJ645657.1	Coronaviridae_17	Porcine epidemic diarrhea virus strain USA/Ohio60/2013, complete genome	Coronaviridae	Alphacoronavirus	Porcine epidemic diarrhea virus	abdominal cavity	2013-11-12	USA	27998	ssRNA(+)	FALSE	FALSE	Sus scrofa
KJ645658.1	Coronaviridae_17	Porcine epidemic diarrhea virus strain USA/Minnesota62/2013, complete genome	Coronaviridae	Alphacoronavirus	Porcine epidemic diarrhea virus	abdominal cavity	2013-11-18	USA	27998	ssRNA(+)	FALSE	FALSE	Sus scrofa
KJ645659.1	Coronaviridae_17	Porcine epidemic diarrhea virus strain USA/Illinois63/2013, complete genome	Coronaviridae	Alphacoronavirus	Porcine epidemic diarrhea virus	feces	2013-11-19	USA	27998	ssRNA(+)	FALSE	FALSE	Sus scrofa
KJ645660.1	Coronaviridae_17	Porcine epidemic diarrhea virus strain USA/Minnesota64/2013, complete genome	Coronaviridae	Alphacoronavirus	Porcine epidemic diarrhea virus	feces	2013-11-19	USA	27998	ssRNA(+)	FALSE	FALSE	Sus scrofa
KJ645661.1	Coronaviridae_17	Porcine epidemic diarrhea virus strain USA/Minnesota65/2013, complete genome	Coronaviridae	Alphacoronavirus	Porcine epidemic diarrhea virus	feces	2013-11-20	USA	27998	ssRNA(+)	FALSE	FALSE	Sus scrofa
KJ645662.1	Coronaviridae_17	Porcine epidemic diarrhea virus strain USA/NorthCarolina66/2013, complete genome	Coronaviridae	Alphacoronavirus	Porcine epidemic diarrhea virus	abdominal cavity	2013-11-23	USA	27998	ssRNA(+)	FALSE	FALSE	Sus scrofa
KJ645663.1	Coronaviridae_17	Porcine epidemic diarrhea virus strain USA/Minnesota67/2013, complete genome	Coronaviridae	Alphacoronavirus	Porcine epidemic diarrhea virus	abdominal cavity	2013-11-23	USA	27998	ssRNA(+)	FALSE	FALSE	Sus scrofa
KJ645664.1	Coronaviridae_17	Porcine epidemic diarrhea virus strain USA/Ohio68/2013, complete genome	Coronaviridae	Alphacoronavirus	Porcine epidemic diarrhea virus	abdominal cavity	2013-11-24	USA	27998	ssRNA(+)	FALSE	FALSE	Sus scrofa
KJ645665.1	Coronaviridae_17	Porcine epidemic diarrhea virus strain USA/Ohio69/2013, complete genome	Coronaviridae	Alphacoronavirus	Porcine epidemic diarrhea virus	feces	2013-11-24	USA	27998	ssRNA(+)	FALSE	FALSE	Sus scrofa
KJ645666.1	Coronaviridae_17	Porcine epidemic diarrhea virus strain USA/Iowa70/2013, complete genome	Coronaviridae	Alphacoronavirus	Porcine epidemic diarrhea virus	abdominal cavity	2013-11-24	USA	27998	ssRNA(+)	FALSE	FALSE	Sus scrofa
KJ645667.1	Coronaviridae_17	Porcine epidemic diarrhea virus strain USA/Minnesota72/2013, complete genome	Coronaviridae	Alphacoronavirus	Porcine epidemic diarrhea virus	feces	2013-11-28	USA	27998	ssRNA(+)	FALSE	FALSE	Sus scrofa
KJ645668.1	Coronaviridae_17	Porcine epidemic diarrhea virus strain USA/Minnesota73/2013, complete genome	Coronaviridae	Alphacoronavirus	Porcine epidemic diarrhea virus	feces	2013-11-25	USA	27998	ssRNA(+)	FALSE	FALSE	Sus scrofa
KJ645669.1	Coronaviridae_17	Porcine epidemic diarrhea virus strain USA/Wisconsin74/2013, complete genome	Coronaviridae	Alphacoronavirus	Porcine epidemic diarrhea virus	abdominal cavity	2013-11-27	USA	27998	ssRNA(+)	FALSE	FALSE	Sus scrofa
KJ645670.1	Coronaviridae_17	Porcine epidemic diarrhea virus strain USA/Ohio75/2013, complete genome	Coronaviridae	Alphacoronavirus	Porcine epidemic diarrhea virus	feces	2013-11-27	USA	27998	ssRNA(+)	FALSE	FALSE	Sus scrofa
KJ645671.1	Coronaviridae_17	Porcine epidemic diarrhea virus strain USA/Minnesota76/2013, complete genome	Coronaviridae	Alphacoronavirus	Porcine epidemic diarrhea virus	feces	2013-11-30	USA	27998	ssRNA(+)	FALSE	FALSE	Sus scrofa
KJ645672.1	Coronaviridae_17	Porcine epidemic diarrhea virus strain USA/Minnesota77/2013, complete genome	Coronaviridae	Alphacoronavirus	Porcine epidemic diarrhea virus	abdominal cavity	2013-11-28	USA	27998	ssRNA(+)	FALSE	FALSE	Sus scrofa
KJ645673.1	Coronaviridae_17	Porcine epidemic diarrhea virus strain USA/Minnesota78/2013, complete genome	Coronaviridae	Alphacoronavirus	Porcine epidemic diarrhea virus	abdominal cavity	2013-11-28	USA	27998	ssRNA(+)	FALSE	FALSE	Sus scrofa
KJ645674.1	Coronaviridae_17	Porcine epidemic diarrhea virus strain USA/Minnesota79/2013, complete genome	Coronaviridae	Alphacoronavirus	Porcine epidemic diarrhea virus	abdominal cavity	2013-11-30	USA	27998	ssRNA(+)	FALSE	FALSE	Sus scrofa
KJ645675.1	Coronaviridae_17	Porcine epidemic diarrhea virus strain USA/Illinois81/2013, complete genome	Coronaviridae	Alphacoronavirus	Porcine epidemic diarrhea virus	abdominal cavity	2013-12-03	USA	27998	ssRNA(+)	FALSE	FALSE	Sus scrofa
KJ645676.1	Coronaviridae_17	Porcine epidemic diarrhea virus strain USA/Minnesota82/2013, complete genome	Coronaviridae	Alphacoronavirus	Porcine epidemic diarrhea virus	feces	2013-12-02	USA	27998	ssRNA(+)	FALSE	FALSE	Sus scrofa
KJ645677.1	Coronaviridae_17	Porcine epidemic diarrhea virus strain USA/Minnesota83/2013, complete genome	Coronaviridae	Alphacoronavirus	Porcine epidemic diarrhea virus	feces	2013-12-02	USA	27998	ssRNA(+)	FALSE	FALSE	Sus scrofa
KJ645678.1	Coronaviridae_17	Porcine epidemic diarrhea virus strain USA/Minnesota85/2013, complete genome	Coronaviridae	Alphacoronavirus	Porcine epidemic diarrhea virus	feces	2013-12-04	USA	27998	ssRNA(+)	FALSE	FALSE	Sus scrofa
KJ645679.1	Coronaviridae_17	Porcine epidemic diarrhea virus strain USA/Minnesota86/2013, complete genome	Coronaviridae	Alphacoronavirus	Porcine epidemic diarrhea virus	feces	2013-12-07	USA	27998	ssRNA(+)	FALSE	FALSE	Sus scrofa
KJ645680.1	Coronaviridae_17	Porcine epidemic diarrhea virus strain USA/Illinois87/2013, complete genome	Coronaviridae	Alphacoronavirus	Porcine epidemic diarrhea virus	feces	2013-12-04	USA	27998	ssRNA(+)	FALSE	FALSE	Sus scrofa
KJ645681.1	Coronaviridae_17	Porcine epidemic diarrhea virus strain USA/Minnesota89/2013, complete genome	Coronaviridae	Alphacoronavirus	Porcine epidemic diarrhea virus	feces	2013-12-04	USA	27998	ssRNA(+)	FALSE	FALSE	Sus scrofa
KJ645682.1	Coronaviridae_17	Porcine epidemic diarrhea virus strain USA/Minnesota90/2013, complete genome	Coronaviridae	Alphacoronavirus	Porcine epidemic diarrhea virus	feces	2013-12-04	USA	27998	ssRNA(+)	FALSE	FALSE	Sus scrofa
KJ645683.1	Coronaviridae_17	Porcine epidemic diarrhea virus strain USA/NorthCarolina91/2013, complete genome	Coronaviridae	Alphacoronavirus	Porcine epidemic diarrhea virus	feces	2013-12-08	USA	27998	ssRNA(+)	FALSE	FALSE	Sus scrofa
KJ645684.1	Coronaviridae_17	Porcine epidemic diarrhea virus strain USA/Missouri92/2013, complete genome	Coronaviridae	Alphacoronavirus	Porcine epidemic diarrhea virus	feces	2013-12-11	USA	27998	ssRNA(+)	FALSE	FALSE	Sus scrofa
KJ645685.1	Coronaviridae_17	Porcine epidemic diarrhea virus strain USA/Missouri93/2013, complete genome	Coronaviridae	Alphacoronavirus	Porcine epidemic diarrhea virus	feces	2013-12-11	USA	27998	ssRNA(+)	FALSE	FALSE	Sus scrofa
KJ645686.1	Coronaviridae_17	Porcine epidemic diarrhea virus strain USA/Minnesota94/2013, complete genome	Coronaviridae	Alphacoronavirus	Porcine epidemic diarrhea virus	feces	2013-12-10	USA	27998	ssRNA(+)	FALSE	FALSE	Sus scrofa
KJ645687.1	Coronaviridae_17	Porcine epidemic diarrhea virus strain USA/Minnesota95/2013, complete genome	Coronaviridae	Alphacoronavirus	Porcine epidemic diarrhea virus	feces	2013-12-10	USA	27998	ssRNA(+)	FALSE	FALSE	Sus scrofa
KJ645688.1	Coronaviridae_17	Porcine epidemic diarrhea virus strain USA/Iowa96/2013, complete genome	Coronaviridae	Alphacoronavirus	Porcine epidemic diarrhea virus	feces	2013-12-11	USA	27998	ssRNA(+)	FALSE	FALSE	Sus scrofa
KJ645689.1	Coronaviridae_17	Porcine epidemic diarrhea virus strain USA/Illinois97/2013, complete genome	Coronaviridae	Alphacoronavirus	Porcine epidemic diarrhea virus	feces	2013-12-11	USA	27998	ssRNA(+)	FALSE	FALSE	Sus scrofa
KJ645690.1	Coronaviridae_17	Porcine epidemic diarrhea virus strain USA/Illinois98/2013, complete genome	Coronaviridae	Alphacoronavirus	Porcine epidemic diarrhea virus	feces	2013-12-11	USA	27998	ssRNA(+)	FALSE	FALSE	Sus scrofa
KJ645691.1	Coronaviridae_17	Porcine epidemic diarrhea virus strain USA/Minnesota100/2013, complete genome	Coronaviridae	Alphacoronavirus	Porcine epidemic diarrhea virus	feces	2013-12-14	USA	27998	ssRNA(+)	FALSE	FALSE	Sus scrofa
KJ645692.1	Coronaviridae_17	Porcine epidemic diarrhea virus strain USA/Missouri101/2013, complete genome	Coronaviridae	Alphacoronavirus	Porcine epidemic diarrhea virus	feces	2013-12-15	USA	27998	ssRNA(+)	FALSE	FALSE	Sus scrofa
KJ645693.1	Coronaviridae_17	Porcine epidemic diarrhea virus strain USA/Missouri102/2013, complete genome	Coronaviridae	Alphacoronavirus	Porcine epidemic diarrhea virus	feces	2013-12-15	USA	27998	ssRNA(+)	FALSE	FALSE	Sus scrofa
KJ645694.1	Coronaviridae_17	Porcine epidemic diarrhea virus strain USA/Iowa103/2013, complete genome	Coronaviridae	Alphacoronavirus	Porcine epidemic diarrhea virus	feces	2013-12-15	USA	27998	ssRNA(+)	FALSE	FALSE	Sus scrofa
KJ645695.1	Coronaviridae_17	Porcine epidemic diarrhea virus strain USA/Iowa106/2013, complete genome	Coronaviridae	Alphacoronavirus	Porcine epidemic diarrhea virus	abdominal cavity	2013-12-29	USA	27989	ssRNA(+)	FALSE	FALSE	Sus scrofa
KJ645696.1	Coronaviridae_17	Porcine epidemic diarrhea virus strain USA/Iowa107/2013, complete genome	Coronaviridae	Alphacoronavirus	Porcine epidemic diarrhea virus	abdominal cavity	2013-12-29	USA	27989	ssRNA(+)	FALSE	FALSE	Sus scrofa
KJ645697.1	Coronaviridae_17	Porcine epidemic diarrhea virus strain USA/Texas128/2013, complete genome	Coronaviridae	Alphacoronavirus	Porcine epidemic diarrhea virus	abdominal cavity	2013-11-12	USA	27998	ssRNA(+)	FALSE	FALSE	Sus scrofa
KJ645698.1	Coronaviridae_17	Porcine epidemic diarrhea virus strain USA/Ohio120/2014, complete genome	Coronaviridae	Alphacoronavirus	Porcine epidemic diarrhea virus	abdominal cavity	2014-01-01	USA	27998	ssRNA(+)	FALSE	FALSE	Sus scrofa
KJ645699.1	Coronaviridae_17	Porcine epidemic diarrhea virus strain USA/Ohio123/2014, complete genome	Coronaviridae	Alphacoronavirus	Porcine epidemic diarrhea virus	feces	2013-12-15	USA	27998	ssRNA(+)	FALSE	FALSE	Sus scrofa
KJ645700.1	Coronaviridae_17	Porcine epidemic diarrhea virus strain MEX/124/2014, complete genome	Coronaviridae	Alphacoronavirus	Porcine epidemic diarrhea virus	feces	2014-01-22	Mexico	27998	ssRNA(+)	FALSE	FALSE	Sus scrofa
KJ645701.1	Coronaviridae_17	Porcine epidemic diarrhea virus strain USA/Kansas125/2014, complete genome	Coronaviridae	Alphacoronavirus	Porcine epidemic diarrhea virus	abdominal cavity	2014-01-27	USA	27998	ssRNA(+)	FALSE	FALSE	Sus scrofa
KJ645702.1	Coronaviridae_17	Porcine epidemic diarrhea virus strain USA/Ohio126/2014, complete genome	Coronaviridae	Alphacoronavirus	Porcine epidemic diarrhea virus	feces	2014-01-29	USA	27989	ssRNA(+)	FALSE	FALSE	Sus scrofa
KJ645703.1	Coronaviridae_17	Porcine epidemic diarrhea virus strain USA/Minnesota127/2014, complete genome	Coronaviridae	Alphacoronavirus	Porcine epidemic diarrhea virus	feces	2014-02-02	USA	27998	ssRNA(+)	FALSE	FALSE	Sus scrofa
KJ645704.1	Coronaviridae_17	Porcine epidemic diarrhea virus strain USA/Minnesota52/2013, complete genome	Coronaviridae	Alphacoronavirus	Porcine epidemic diarrhea virus	feces	2013-06-26	USA	27989	ssRNA(+)	FALSE	FALSE	Sus scrofa
KJ645705.1	Coronaviridae_17	Porcine epidemic diarrhea virus strain USA/Minnesota61/2013, complete genome	Coronaviridae	Alphacoronavirus	Porcine epidemic diarrhea virus	abdominal cavity	2013-11-18	USA	27998	ssRNA(+)	FALSE	FALSE	Sus scrofa
KJ645706.1	Coronaviridae_17	Porcine epidemic diarrhea virus strain USA/Minnesota71/2013, complete genome	Coronaviridae	Alphacoronavirus	Porcine epidemic diarrhea virus	feces	2013-11-25	USA	27998	ssRNA(+)	FALSE	FALSE	Sus scrofa
KJ645707.1	Coronaviridae_17	Porcine epidemic diarrhea virus strain USA/Minnesota84/2013, complete genome	Coronaviridae	Alphacoronavirus	Porcine epidemic diarrhea virus	abdominal cavity	2013-12-03	USA	27998	ssRNA(+)	FALSE	FALSE	Sus scrofa
KJ645708.1	Coronaviridae_17	Porcine epidemic diarrhea virus strain MEX/104/2013, complete genome	Coronaviridae	Alphacoronavirus	Porcine epidemic diarrhea virus	abdominal cavity	2013-11-03	Mexico	27998	ssRNA(+)	FALSE	FALSE	Sus scrofa
KJ650098.1	Coronaviridae_26	Middle East respiratory syndrome coronavirus isolate Camel/Qatar_2_2014, complete genome	Coronaviridae	Betacoronavirus	Middle East respiratory syndrome-related coronavirus		2014-02-16	Qatar	30117	ssRNA(+)	FALSE	FALSE	Camelus dromedarius
KJ650295.1	Coronaviridae_26	Middle East respiratory syndrome coronavirus isolate KFU-HKU 13, complete genome	Coronaviridae	Betacoronavirus	Middle East respiratory syndrome-related coronavirus		2013-12-30	Saudi Arabia	30100	ssRNA(+)	FALSE	FALSE	Camelus dromedarius
KJ650296.1	Coronaviridae_26	Middle East respiratory syndrome coronavirus isolate KFU-HKU 19Dam, complete genome	Coronaviridae	Betacoronavirus	Middle East respiratory syndrome-related coronavirus		2013-12-30	Saudi Arabia	30099	ssRNA(+)	FALSE	FALSE	Camelus dromedarius
KJ650297.1	Coronaviridae_26	Middle East respiratory syndrome coronavirus isolate KFU-HKU 1, complete genome	Coronaviridae	Betacoronavirus	Middle East respiratory syndrome-related coronavirus		2013-11-30	Saudi Arabia	30105	ssRNA(+)	FALSE	FALSE	Camelus dromedarius
KJ662670.1	Coronaviridae_17	Porcine epidemic diarrhea virus isolate KNU-1305, complete genome	Coronaviridae	Alphacoronavirus	Porcine epidemic diarrhea virus	feces	2013-12-15	South Korea	28038	ssRNA(+)	FALSE	FALSE	Sus scrofa
KJ713295.1	Coronaviridae_26	Middle East respiratory syndrome coronavirus isolate KSA-CAMEL-505, complete genome	Coronaviridae	Betacoronavirus	Middle East respiratory syndrome-related coronavirus	oronasopharynx	2013-11-15	Saudi Arabia	30113	ssRNA(+)	FALSE	FALSE	Camelus dromedarius
KJ713296.1	Coronaviridae_26	Middle East respiratory syndrome coronavirus isolate KSA-CAMEL-378, complete genome	Coronaviridae	Betacoronavirus	Middle East respiratory syndrome-related coronavirus	oronasopharynx	2013-11-15	Saudi Arabia	30113	ssRNA(+)	FALSE	FALSE	Camelus dromedarius
KJ713297.1	Coronaviridae_26	Middle East respiratory syndrome coronavirus isolate KSA-CAMEL-503, complete genome	Coronaviridae	Betacoronavirus	Middle East respiratory syndrome-related coronavirus	oronasopharynx	2013-11-15	Saudi Arabia	30114	ssRNA(+)	FALSE	FALSE	Camelus dromedarius
KJ713298.1	Coronaviridae_26	Middle East respiratory syndrome coronavirus isolate KSA-CAMEL-363, complete genome	Coronaviridae	Betacoronavirus	Middle East respiratory syndrome-related coronavirus	oronasopharynx	2013-11-15	Saudi Arabia	30083	ssRNA(+)	FALSE	FALSE	Camelus dromedarius
KJ713299.1	Coronaviridae_26	Middle East respiratory syndrome coronavirus isolate KSA-CAMEL-376, complete genome	Coronaviridae	Betacoronavirus	Middle East respiratory syndrome-related coronavirus	oronasopharynx	2013-11-15	Saudi Arabia	30116	ssRNA(+)	FALSE	FALSE	Camelus dromedarius
KJ769231.1	Coronaviridae_18	Swine deltacoronavirus OhioCVM1/2014, complete genome	Coronaviridae	Deltacoronavirus	Coronavirus HKU15		2014-03-01	USA	25433	ssRNA(+)	FALSE	FALSE	Sus scrofa
KJ777677.1	Coronaviridae_17	Porcine epidemic diarrhea virus strain LZW isolate FGE_20140427, complete genome	Coronaviridae	Alphacoronavirus	Porcine epidemic diarrhea virus	feces	2012-02-15	China	28038	ssRNA(+)	FALSE	FALSE	Sus scrofa
KJ777678.1	Coronaviridae_17	Porcine epidemic diarrhea virus strain LZW isolate CPGEN_20140427, complete genome	Coronaviridae	Alphacoronavirus	Porcine epidemic diarrhea virus		2012-02-15	China	28038	ssRNA(+)	FALSE	FALSE
KJ778615.1	Coronaviridae_17	Porcine epidemic diarrhea virus isolate NPL-PEDv/2013, complete genome	Coronaviridae	Alphacoronavirus	Porcine epidemic diarrhea virus	feces, abdominal cavity	2013-05-20	USA	28038	ssRNA(+)	FALSE	FALSE	Sus scrofa
KJ778616.1	Coronaviridae_17	Porcine epidemic diarrhea virus isolate NPL-PEDv/2013/P10, complete genome	Coronaviridae	Alphacoronavirus	Porcine epidemic diarrhea virus	feces, abdominal cavity	2013-05-20	USA	28025	ssRNA(+)	FALSE	FALSE	Sus scrofa
KJ813439.1	Coronaviridae_26	Middle East respiratory syndrome coronavirus strain Indiana/USA-1_Saudi Arabia_2014, complete genome	Coronaviridae	Betacoronavirus	Middle East respiratory syndrome-related coronavirus	lung, oronasopharynx	2014-04-30	USA	30123	ssRNA(+)	FALSE	FALSE	Homo sapiens
KJ829365.1	Coronaviridae_26	Middle East respiratory syndrome coronavirus strain Florida/USA-2_Saudi Arabia_2014, complete genome	Coronaviridae	Betacoronavirus	Middle East respiratory syndrome-related coronavirus	lung, oronasopharynx	2014-05-10	USA	30123	ssRNA(+)	FALSE	FALSE	Homo sapiens
KJ958218.1	Coronaviridae_4	Human coronavirus OC43 strain LY341, complete genome	Coronaviridae	Betacoronavirus	Betacoronavirus 1		2011-10-03	China	30714	ssRNA(+)	FALSE	FALSE	Homo sapiens
KJ958219.1	Coronaviridae_4	Human coronavirus OC43 strain LY342, complete genome	Coronaviridae	Betacoronavirus	Betacoronavirus 1		2011-10-04	China	30714	ssRNA(+)	FALSE	FALSE	Homo sapiens
KJ960178.1	Coronaviridae_17	Porcine epidemic diarrhea virus clone VN/JFP1013_1/2013/Vinh An/Vietnam, complete genome	Coronaviridae	Alphacoronavirus	Porcine epidemic diarrhea virus	feces, abdominal cavity	2013-06-01	Viet Nam	28035	ssRNA(+)	FALSE	FALSE	Sus scrofa
KJ960179.1	Coronaviridae_17	Porcine epidemic diarrhea virus clone VN/VAP1113_1/2013/Vung Tua/Vietnam, complete genome	Coronaviridae	Alphacoronavirus	Porcine epidemic diarrhea virus	feces, abdominal cavity	2013-06-01	Viet Nam	28035	ssRNA(+)	FALSE	FALSE	Sus scrofa
KJ960180.1	Coronaviridae_17	Porcine epidemic diarrhea virus clone VN/KCHY-310113/2013/KhoaiChau/HungYen/Vietnam, complete genome	Coronaviridae	Alphacoronavirus	Porcine epidemic diarrhea virus	feces, abdominal cavity	2013-06-01	Viet Nam	28035	ssRNA(+)	FALSE	FALSE	Sus scrofa
KM012168.1	Coronaviridae_18	Porcine coronavirus HKU15 strain Michigan/8977/2014, complete genome	Coronaviridae	Deltacoronavirus	Coronavirus HKU15		2014-03-17	USA	25411	ssRNA(+)	FALSE	FALSE	Sus scrofa
KM027255.1	Coronaviridae_26	Middle East respiratory syndrome coronavirus isolate Jeddah_C7149/KSA/2014-04-05, complete genome	Coronaviridae	Betacoronavirus	Middle East respiratory syndrome-related coronavirus		2014-06-01	Saudi Arabia	29919	ssRNA(+)	FALSE	FALSE	Homo sapiens
KM027257.1	Coronaviridae_26	Middle East respiratory syndrome coronavirus isolate Jeddah_C7770/KSA/2014-04-07, complete genome	Coronaviridae	Betacoronavirus	Middle East respiratory syndrome-related coronavirus		2014-04-07	Saudi Arabia	29774	ssRNA(+)	FALSE	FALSE	Homo sapiens
KM027258.1	Coronaviridae_26	Middle East respiratory syndrome coronavirus isolate Jeddah_C8826/KSA/2014-04-12, complete genome	Coronaviridae	Betacoronavirus	Middle East respiratory syndrome-related coronavirus		2014-04-12	Saudi Arabia	29809	ssRNA(+)	FALSE	FALSE	Homo sapiens
KM027259.1	Coronaviridae_26	Middle East respiratory syndrome coronavirus isolate Jeddah_C9055/KSA/2014-04-14, complete genome	Coronaviridae	Betacoronavirus	Middle East respiratory syndrome-related coronavirus		2014-04-14	Saudi Arabia	29918	ssRNA(+)	FALSE	FALSE	Homo sapiens
KM027260.1	Coronaviridae_26	Middle East respiratory syndrome coronavirus isolate Jeddah_C10306/KSA/2014-04-20, complete genome	Coronaviridae	Betacoronavirus	Middle East respiratory syndrome-related coronavirus		2014-04-21	Saudi Arabia	29874	ssRNA(+)	FALSE	FALSE	Homo sapiens
KM027261.1	Coronaviridae_26	Middle East respiratory syndrome coronavirus isolate Makkah_C9355/KSA/Makkah/2014-04-15, complete genome	Coronaviridae	Betacoronavirus	Middle East respiratory syndrome-related coronavirus		2014-04-15	Saudi Arabia	29809	ssRNA(+)	FALSE	FALSE	Homo sapiens
KM027262.1	Coronaviridae_26	Middle East respiratory syndrome coronavirus isolate Riyadh_2014KSA_683/KSA/2014, complete genome	Coronaviridae	Betacoronavirus	Middle East respiratory syndrome-related coronavirus		2014-04-22	Saudi Arabia	29896	ssRNA(+)	FALSE	FALSE	Homo sapiens
KM052365.1	Coronaviridae_17	Porcine epidemic diarrhea virus strain NPL-PEDv/2013/p10.1, complete genome	Coronaviridae	Alphacoronavirus	Porcine epidemic diarrhea virus		2013-05-15	USA	28038	ssRNA(+)	FALSE	FALSE	Sus scrofa
KM077139.1	Coronaviridae_17	Porcine epidemic diarrhea virus strain PEDV/USA/Minnesota188/2014, complete genome	Coronaviridae	Alphacoronavirus	Porcine epidemic diarrhea virus		2014-01-22	USA	28020	ssRNA(+)	FALSE	FALSE
KM089829.1	Coronaviridae_17	Porcine epidemic diarrhea virus strain GDS01, complete genome	Coronaviridae	Alphacoronavirus	Porcine epidemic diarrhea virus		2012-11-10	China	28047	ssRNA(+)	FALSE	FALSE	Sus scrofa
KM189367.2	Coronaviridae_17	Porcine epidemic diarrhea virus isolate ON-018, complete genome	Coronaviridae	Alphacoronavirus	Porcine epidemic diarrhea virus	feces	2014-02-04	Canada	28061	ssRNA(+)	FALSE	FALSE	Sus scrofa
KM210277.1	Coronaviridae_26	Middle East respiratory syndrome coronavirus isolate England/4/2013, complete genome	Coronaviridae	Betacoronavirus	Middle East respiratory syndrome-related coronavirus	lung, oronasopharynx	2013-02-13	United Kingdom	30031	ssRNA(+)	FALSE	FALSE	Homo sapiens
KM210278.1	Coronaviridae_26	Middle East respiratory syndrome coronavirus isolate England/3/2013, complete genome	Coronaviridae	Betacoronavirus	Middle East respiratory syndrome-related coronavirus	oronasopharynx	2013-02-10	United Kingdom	30035	ssRNA(+)	FALSE	FALSE	Homo sapiens
KM213963.1	Coronaviridae_6	Infectious bronchitis virus isolate CK/CH/XDC- 2/2013, complete genome	Coronaviridae	Gammacoronavirus	Avian coronavirus		2013-06-01	China	27714	ssRNA(+)	FALSE	FALSE	Gallus gallus
KM347965.1	Coronaviridae_39	Ferret coronavirus isolate FRCoV-NL-2010, complete genome	Coronaviridae	Alphacoronavirus	Ferret coronavirus		2010-06-01	Netherlands	28434	ssRNA(+)	FALSE	FALSE	Mustela putorius
KM349742.1	Coronaviridae_40	Betacoronavirus HKU24 strain HKU24-R05005I, complete genome	Coronaviridae	Betacoronavirus	China Rattus coronavirus HKU24		2012-05-17	China	31249	ssRNA(+)	FALSE	FALSE	Rattus norvegicus
KM349743.1	Coronaviridae_40	Betacoronavirus HKU24 strain HKU24-R05009I, complete genome	Coronaviridae	Betacoronavirus	China Rattus coronavirus HKU24		2012-05-17	China	31249	ssRNA(+)	FALSE	FALSE	Rattus norvegicus
KM349744.1	Coronaviridae_40	Betacoronavirus HKU24 strain HKU24-R05010I, complete genome	Coronaviridae	Betacoronavirus	China Rattus coronavirus HKU24		2012-05-17	China	31249	ssRNA(+)	FALSE	FALSE	Rattus norvegicus
KM392224.1	Coronaviridae_17	Porcine epidemic diarrhea virus strain TC PC22A-P10, complete genome	Coronaviridae	Alphacoronavirus	Porcine epidemic diarrhea virus		2013-06-15	USA	28032	ssRNA(+)	FALSE	FALSE	Sus scrofa
KM392225.1	Coronaviridae_17	Porcine epidemic diarrhea virus strain TC PE103(PC21A)-P4, complete genome	Coronaviridae	Alphacoronavirus	Porcine epidemic diarrhea virus		2013-06-15	USA	28026	ssRNA(+)	FALSE	FALSE	Sus scrofa
KM392226.1	Coronaviridae_17	Porcine epidemic diarrhea virus strain TC PC168-P2, complete genome	Coronaviridae	Alphacoronavirus	Porcine epidemic diarrhea virus		2013-11-15	USA	28038	ssRNA(+)	FALSE	FALSE	Sus scrofa
KM392227.1	Coronaviridae_17	Porcine epidemic diarrhea virus strain TC PC170-P2, complete genome	Coronaviridae	Alphacoronavirus	Porcine epidemic diarrhea virus		2013-11-15	USA	28048	ssRNA(+)	FALSE	FALSE	Sus scrofa
KM392228.1	Coronaviridae_17	Porcine epidemic diarrhea virus strain TC-PC173-P2, complete genome	Coronaviridae	Alphacoronavirus	Porcine epidemic diarrhea virus		2013-12-15	USA	28028	ssRNA(+)	FALSE	FALSE	Sus scrofa
KM392229.1	Coronaviridae_17	Porcine epidemic diarrhea virus strain TC PC177-P2, complete genome	Coronaviridae	Alphacoronavirus	Porcine epidemic diarrhea virus		2013-12-15	USA	27437	ssRNA(+)	FALSE	FALSE	Sus scrofa
KM392230.1	Coronaviridae_17	Porcine epidemic diarrhea virus strain TC PC180-P2, complete genome	Coronaviridae	Alphacoronavirus	Porcine epidemic diarrhea virus		2013-12-15	USA	28025	ssRNA(+)	FALSE	FALSE	Sus scrofa
KM392231.1	Coronaviridae_17	Porcine epidemic diarrhea virus strain TC PC182-P2, complete genome	Coronaviridae	Alphacoronavirus	Porcine epidemic diarrhea virus		2013-12-15	USA	28023	ssRNA(+)	FALSE	FALSE	Sus scrofa
KM392232.1	Coronaviridae_17	Porcine epidemic diarrhea virus strain TC Iowa106 (PV39)-P1, complete genome	Coronaviridae	Alphacoronavirus	Porcine epidemic diarrhea virus		2013-12-15	USA	28017	ssRNA(+)	FALSE	FALSE	Sus scrofa
KM403155.1	Coronaviridae_17	Porcine epidemic diarrhea virus isolate KNU-1406-1, complete genome	Coronaviridae	Alphacoronavirus	Porcine epidemic diarrhea virus	feces	2014-03-15	South Korea	28029	ssRNA(+)	FALSE	FALSE	Sus scrofa
KM454473.1	Coronaviridae_6	Duck coronavirus isolate DK/GD/27/2014, complete genome	Coronaviridae	Gammacoronavirus	Avian coronavirus		2014-06-01	China	27754	ssRNA(+)	FALSE	FALSE	Anatidae
KM586818.1	Coronaviridae_6	Infectious bronchitis virus isolate P100, complete genome	Coronaviridae	Gammacoronavirus	Avian coronavirus		2008-08-15	China	27647	ssRNA(+)	FALSE	FALSE	Gallus gallus
KM609203.1	Coronaviridae_17	Porcine epidemic diarrhea virus strain PEDV-1C, complete genome	Coronaviridae	Alphacoronavirus	Porcine epidemic diarrhea virus	abdominal cavity	2012-03-15	China	28047	ssRNA(+)	FALSE	FALSE	Sus scrofa
KM609204.1	Coronaviridae_17	Porcine epidemic diarrhea virus strain PEDV-7C, complete genome	Coronaviridae	Alphacoronavirus	Porcine epidemic diarrhea virus	abdominal cavity	2011-06-15	China	28050	ssRNA(+)	FALSE	FALSE	Sus scrofa
KM609206.1	Coronaviridae_17	Porcine epidemic diarrhea virus strain PEDV-10F, complete genome	Coronaviridae	Alphacoronavirus	Porcine epidemic diarrhea virus	feces	2012-01-15	China	28050	ssRNA(+)	FALSE	FALSE	Sus scrofa
KM609207.1	Coronaviridae_17	Porcine epidemic diarrhea virus strain PEDV-14, complete genome	Coronaviridae	Alphacoronavirus	Porcine epidemic diarrhea virus	abdominal cavity	2011-04-15	China	28050	ssRNA(+)	FALSE	FALSE	Sus scrofa
KM609208.1	Coronaviridae_17	Porcine epidemic diarrhea virus strain PEDV-15F, complete genome	Coronaviridae	Alphacoronavirus	Porcine epidemic diarrhea virus	feces	2012-03-15	China	28050	ssRNA(+)	FALSE	FALSE	Sus scrofa
KM609209.1	Coronaviridae_17	Porcine epidemic diarrhea virus strain PEDV-CHZ, complete genome	Coronaviridae	Alphacoronavirus	Porcine epidemic diarrhea virus	abdominal cavity	2013-03-15	China	28050	ssRNA(+)	FALSE	FALSE	Sus scrofa
KM609210.1	Coronaviridae_17	Porcine epidemic diarrhea virus strain PEDV-LY, complete genome	Coronaviridae	Alphacoronavirus	Porcine epidemic diarrhea virus	abdominal cavity	2014-01-15	China	28038	ssRNA(+)	FALSE	FALSE	Sus scrofa
KM609211.1	Coronaviridae_17	Porcine epidemic diarrhea virus strain PEDV-LS, complete genome	Coronaviridae	Alphacoronavirus	Porcine epidemic diarrhea virus	abdominal cavity	2014-01-15	China	28038	ssRNA(+)	FALSE	FALSE	Sus scrofa
KM609212.1	Coronaviridae_17	Porcine epidemic diarrhea virus strain PEDV-LYG, complete genome	Coronaviridae	Alphacoronavirus	Porcine epidemic diarrhea virus	abdominal cavity	2014-03-15	China	28038	ssRNA(+)	FALSE	FALSE	Sus scrofa
KM609213.1	Coronaviridae_17	Porcine epidemic diarrhea virus strain PEDV-WS, complete genome	Coronaviridae	Alphacoronavirus	Porcine epidemic diarrhea virus	abdominal cavity	2014-03-15	China	28038	ssRNA(+)	FALSE	FALSE	Sus scrofa
KM820765.1	Coronaviridae_18	Porcine deltacoronavirus KNU14-04, complete genome	Coronaviridae	Deltacoronavirus	Coronavirus HKU15	feces	2014-04-15	South Korea	25422	ssRNA(+)	FALSE	FALSE	Sus scrofa
KM887144.1	Coronaviridae_17	Porcine epidemic diarrhea virus isolate CHM2013, complete genome	Coronaviridae	Alphacoronavirus	Porcine epidemic diarrhea virus		2013-06-01	China	27994	ssRNA(+)	FALSE	FALSE	Sus scrofa
KM975735.1	Coronaviridae_17	Porcine epidemic diarrhea virus strain USA/NC/2013/35140, complete genome	Coronaviridae	Alphacoronavirus	Porcine epidemic diarrhea virus		2013-09-12	USA	28038	ssRNA(+)	FALSE	FALSE	Sus scrofa
KM975736.1	Coronaviridae_17	Porcine epidemic diarrhea virus strain USA/IA/2013/49379, complete genome	Coronaviridae	Alphacoronavirus	Porcine epidemic diarrhea virus		2013-12-09	USA	28038	ssRNA(+)	FALSE	FALSE	Sus scrofa
KM975737.1	Coronaviridae_17	Porcine epidemic diarrhea virus strain USA/NC/2013/49469, complete genome	Coronaviridae	Alphacoronavirus	Porcine epidemic diarrhea virus		2013-12-10	USA	28038	ssRNA(+)	FALSE	FALSE	Sus scrofa
KM975738.1	Coronaviridae_17	Porcine epidemic diarrhea virus strain USA/IA/2013/19321, complete genome	Coronaviridae	Alphacoronavirus	Porcine epidemic diarrhea virus		2013-05-16	USA	28029	ssRNA(+)	FALSE	FALSE	Sus scrofa
KM975739.1	Coronaviridae_17	Porcine epidemic diarrhea virus strain USA/IA/2013/20849, complete genome	Coronaviridae	Alphacoronavirus	Porcine epidemic diarrhea virus		2013-05-29	USA	28029	ssRNA(+)	FALSE	FALSE	Sus scrofa
KM975740.1	Coronaviridae_17	Porcine epidemic diarrhea virus strain USA/IL/2013/59573-5, complete genome	Coronaviridae	Alphacoronavirus	Porcine epidemic diarrhea virus		2013-12-31	USA	28029	ssRNA(+)	FALSE	FALSE	Sus scrofa
KM975741.1	Coronaviridae_17	Porcine epidemic diarrhea virus strain USA/MO/2014/03293, complete genome	Coronaviridae	Alphacoronavirus	Porcine epidemic diarrhea virus		2014-01-20	USA	28029	ssRNA(+)	FALSE	FALSE	Sus scrofa
KP036502.1	Coronaviridae_6	Infectious bronchitis virus strain ck/CH/LHLJ/140906, complete genome	Coronaviridae	Gammacoronavirus	Avian coronavirus		2014-06-01	China	27611	ssRNA(+)	FALSE	FALSE	Gallus gallus
KP036503.1	Coronaviridae_6	Infectious bronchitis virus strain ck/CH/LHB/121010, complete genome	Coronaviridae	Gammacoronavirus	Avian coronavirus		2012-06-01	China	27613	ssRNA(+)	FALSE	FALSE	Gallus gallus
KP036504.1	Coronaviridae_6	Infectious bronchitis virus strain ck/CH/LHB/130630, complete genome	Coronaviridae	Gammacoronavirus	Avian coronavirus		2013-06-01	China	27617	ssRNA(+)	FALSE	FALSE	Gallus gallus
KP036505.1	Coronaviridae_6	Infectious bronchitis virus strain ck/CH/LJL/130925, complete genome	Coronaviridae	Gammacoronavirus	Avian coronavirus		2013-06-01	China	27676	ssRNA(+)	FALSE	FALSE	Gallus gallus
KP118880.1	Coronaviridae_6	Infectious bronchitis virus strain ck/CH/LHB/130927, complete genome	Coronaviridae	Gammacoronavirus	Avian coronavirus		2013-06-01	China	27618	ssRNA(+)	FALSE	FALSE	Gallus gallus
KP118881.1	Coronaviridae_6	Infectious bronchitis virus strain ck/CH/LBJ/140413, complete genome	Coronaviridae	Gammacoronavirus	Avian coronavirus		2014-06-01	China	27618	ssRNA(+)	FALSE	FALSE	Gallus gallus
KP118882.1	Coronaviridae_6	Infectious bronchitis virus strain ck/CH/LBJ/140402, complete genome	Coronaviridae	Gammacoronavirus	Avian coronavirus		2014-06-01	China	27618	ssRNA(+)	FALSE	FALSE	Gallus gallus
KP118883.1	Coronaviridae_6	Infectious bronchitis virus strain ck/CH/LHB/121041, complete genome	Coronaviridae	Gammacoronavirus	Avian coronavirus		2012-06-01	China	27615	ssRNA(+)	FALSE	FALSE	Gallus gallus
KP118884.1	Coronaviridae_6	Infectious bronchitis virus strain ck/CH/LSD/110851, complete genome	Coronaviridae	Gammacoronavirus	Avian coronavirus		2011-06-01	China	27617	ssRNA(+)	FALSE	FALSE	Gallus gallus
KP118885.1	Coronaviridae_6	Infectious bronchitis virus strain ck/CH/LSD/110857, complete genome	Coronaviridae	Gammacoronavirus	Avian coronavirus		2011-06-01	China	27618	ssRNA(+)	FALSE	FALSE	Gallus gallus
KP118886.1	Coronaviridae_6	Infectious bronchitis virus strain ck/CH/LSD/111235, complete genome	Coronaviridae	Gammacoronavirus	Avian coronavirus		2011-06-01	China	27686	ssRNA(+)	FALSE	FALSE	Gallus gallus
KP118887.1	Coronaviridae_6	Infectious bronchitis virus strain ck/CH/LHB/140532, complete genome	Coronaviridae	Gammacoronavirus	Avian coronavirus		2014-06-01	China	27621	ssRNA(+)	FALSE	FALSE	Gallus gallus
KP118888.1	Coronaviridae_6	Infectious bronchitis virus strain ck/CH/LLN/130102, complete genome	Coronaviridae	Gammacoronavirus	Avian coronavirus		2013-06-01	China	27617	ssRNA(+)	FALSE	FALSE	Gallus gallus
KP118889.1	Coronaviridae_6	Infectious bronchitis virus strain ck/CH/LHB/130575, complete genome	Coronaviridae	Gammacoronavirus	Avian coronavirus		2013-06-01	China	27682	ssRNA(+)	FALSE	FALSE	Gallus gallus
KP118890.1	Coronaviridae_6	Infectious bronchitis virus strain ck/CH/LHB/130578, complete genome	Coronaviridae	Gammacoronavirus	Avian coronavirus		2013-06-01	China	27682	ssRNA(+)	FALSE	FALSE	Gallus gallus
KP118891.1	Coronaviridae_6	Infectious bronchitis virus strain ck/CH/LHLJ/111246, complete genome	Coronaviridae	Gammacoronavirus	Avian coronavirus		2011-06-01	China	27618	ssRNA(+)	FALSE	FALSE	Gallus gallus
KP118892.1	Coronaviridae_6	Infectious bronchitis virus strain ck/CH/LLN/130101, complete genome	Coronaviridae	Gammacoronavirus	Avian coronavirus		2013-06-01	China	27594	ssRNA(+)	FALSE	FALSE	Gallus gallus
KP118893.1	Coronaviridae_6	Infectious bronchitis virus strain ck/CH/LSD/110410, complete genome	Coronaviridae	Gammacoronavirus	Avian coronavirus		2011-06-01	China	27618	ssRNA(+)	FALSE	FALSE	Gallus gallus
KP118894.1	Coronaviridae_6	Infectious bronchitis virus strain ck/CH/LGD/090907, complete genome	Coronaviridae	Gammacoronavirus	Avian coronavirus		2009-06-01	China	27685	ssRNA(+)	FALSE	FALSE	Gallus gallus
KP143507.1	Coronaviridae_10	Feline coronavirus isolate 27C, complete genome	Coronaviridae	Alphacoronavirus	Alphacoronavirus 1		2013-01-01	United Kingdom	28984	ssRNA(+)	FALSE	FALSE	Felis catus
KP143508.1	Coronaviridae_10	Feline coronavirus isolate 28O, complete genome	Coronaviridae	Alphacoronavirus	Alphacoronavirus 1		2013-01-01	United Kingdom	28967	ssRNA(+)	FALSE	FALSE	Felis catus
KP143509.1	Coronaviridae_10	Feline coronavirus isolate 65F, complete genome	Coronaviridae	Alphacoronavirus	Alphacoronavirus 1		2013-01-01	United Kingdom	28968	ssRNA(+)	FALSE	FALSE	Felis catus
KP143510.1	Coronaviridae_10	Feline coronavirus isolate 67F, complete genome	Coronaviridae	Alphacoronavirus	Alphacoronavirus 1		2013-01-01	United Kingdom	28967	ssRNA(+)	FALSE	FALSE	Felis catus
KP143511.1	Coronaviridae_10	Feline coronavirus isolate 80F, complete genome	Coronaviridae	Alphacoronavirus	Alphacoronavirus 1		2013-01-01	United Kingdom	28971	ssRNA(+)	FALSE	FALSE	Felis catus
KP143512.1	Coronaviridae_10	Feline coronavirus isolate 26M, complete genome	Coronaviridae	Alphacoronavirus	Alphacoronavirus 1		2013-01-01	United Kingdom	28956	ssRNA(+)	FALSE	FALSE	Felis catus
KP162057.1	Coronaviridae_17	Porcine epidemic diarrhea virus isolate SC1402, complete genome	Coronaviridae	Alphacoronavirus	Porcine epidemic diarrhea virus		2014-03-15	China	27959	ssRNA(+)	FALSE	FALSE	Sus scrofa
KP198610.1	Coronaviridae_4	Human coronavirus OC43 strain 2058A/10, complete genome	Coronaviridae	Betacoronavirus	Betacoronavirus 1	oronasopharynx	2010-06-15	China	30752	ssRNA(+)	FALSE	FALSE	Homo sapiens
KP198611.1	Coronaviridae_4	Human coronavirus OC43 strain 1783A/10, complete genome	Coronaviridae	Betacoronavirus	Betacoronavirus 1	oronasopharynx	2010-01-15	China	30752	ssRNA(+)	FALSE	FALSE	Homo sapiens
KP202848.1	Coronaviridae_5	Transmissible gastroenteritis virus isolate SHXB, complete genome	Coronaviridae	Alphacoronavirus	Alphacoronavirus 1		2013-03-07	China	28611	ssRNA(+)	FALSE	FALSE	Sus scrofa
KP209306.1	Coronaviridae_26	Middle East respiratory syndrome coronavirus strain Abu Dhabi_UAE_8_2014, complete genome	Coronaviridae	Betacoronavirus	Middle East respiratory syndrome-related coronavirus	lung	2014-04-07	United Arab Emirates	30123	ssRNA(+)	FALSE	FALSE	Homo sapiens
KP209309.1	Coronaviridae_26	Middle East respiratory syndrome coronavirus strain Abu Dhabi_UAE_30_2014, complete genome	Coronaviridae	Betacoronavirus	Middle East respiratory syndrome-related coronavirus	lung, oronasopharynx	2014-04-19	United Arab Emirates	30123	ssRNA(+)	FALSE	FALSE	Homo sapiens
KP209310.1	Coronaviridae_26	Middle East respiratory syndrome coronavirus strain Abu Dhabi/Gayathi_UAE_2_2014, complete genome	Coronaviridae	Betacoronavirus	Middle East respiratory syndrome-related coronavirus	lung, oronasopharynx	2014-03-07	United Arab Emirates	30123	ssRNA(+)	FALSE	FALSE	Homo sapiens
KP209311.1	Coronaviridae_26	Middle East respiratory syndrome coronavirus strain Abu Dhabi_UAE_33_2014, complete genome	Coronaviridae	Betacoronavirus	Middle East respiratory syndrome-related coronavirus	lung, oronasopharynx	2014-04-17	United Arab Emirates	30123	ssRNA(+)	FALSE	FALSE	Homo sapiens
KP209312.1	Coronaviridae_26	Middle East respiratory syndrome coronavirus strain Abu Dhabi_UAE_9_2013, complete genome	Coronaviridae	Betacoronavirus	Middle East respiratory syndrome-related coronavirus	lung	2013-11-15	United Arab Emirates	30123	ssRNA(+)	FALSE	FALSE	Homo sapiens
KP209313.1	Coronaviridae_26	Middle East respiratory syndrome coronavirus strain Abu Dhabi_UAE_26_2014, complete genome	Coronaviridae	Betacoronavirus	Middle East respiratory syndrome-related coronavirus	lung, oronasopharynx	2014-04-13	United Arab Emirates	30123	ssRNA(+)	FALSE	FALSE	Homo sapiens
KP223131.1	Coronaviridae_26	Middle East respiratory syndrome coronavirus isolate Florida/USA-2_Saudi Arabia_2014, complete genome	Coronaviridae	Betacoronavirus	Middle East respiratory syndrome-related coronavirus	lung, oronasopharynx	2014-06-15	USA	30123	ssRNA(+)	FALSE	FALSE	Homo sapiens
KP343691.1	Coronaviridae_6	Infectious bronchitis virus strain ck/CH/LGX/130530, complete genome	Coronaviridae	Gammacoronavirus	Avian coronavirus		2013-06-01	China	27615	ssRNA(+)	FALSE	FALSE	Gallus gallus
KP403954.1	Coronaviridae_17	Porcine epidemic diarrhea virus strain Ukraine/Poltava01/2014, complete genome	Coronaviridae	Alphacoronavirus	Porcine epidemic diarrhea virus	feces	2014-11-22	Ukraine	27823	ssRNA(+)	FALSE	FALSE	Sus scrofa
KP641661.1	Coronaviridae_17	Porcine epidemic diarrhea virus strain OH10123-14, complete genome	Coronaviridae	Alphacoronavirus	Porcine epidemic diarrhea virus	abdominal cavity	2014-04-22	USA	28038	ssRNA(+)	FALSE	FALSE	Sus scrofa
KP641662.1	Coronaviridae_17	Porcine epidemic diarrhea virus strain OH8593-14, complete genome	Coronaviridae	Alphacoronavirus	Porcine epidemic diarrhea virus	feces	2014-10-14	USA	28008	ssRNA(+)	FALSE	FALSE	Sus scrofa
KP641663.1	Coronaviridae_17	Porcine epidemic diarrhea virus strain OH9097-14, complete genome	Coronaviridae	Alphacoronavirus	Porcine epidemic diarrhea virus	feces	2014-10-19	USA	28002	ssRNA(+)	FALSE	FALSE	Sus scrofa
KP662631.1	Coronaviridae_6	Infectious bronchitis virus isolate ck/ZA/3665/11, complete genome	Coronaviridae	Gammacoronavirus	Avian coronavirus	allantoic fluid	2011-06-01	South Africa	27388	ssRNA(+)	FALSE	FALSE	Gallus gallus
KP688354.1	Coronaviridae_17	Porcine epidemic diarrhea virus strain Hawaii/39249/2014, complete genome	Coronaviridae	Alphacoronavirus	Porcine epidemic diarrhea virus	feces	2014-11-13	USA	27989	ssRNA(+)	FALSE	FALSE	Sus scrofa
KP719927.1	Coronaviridae_26	Middle East respiratory syndrome coronavirus isolate Camel/UAE/D1164.9/2014, complete genome	Coronaviridae	Betacoronavirus	Middle East respiratory syndrome-related coronavirus		2014-06-15	United Arab Emirates	29559	ssRNA(+)	FALSE	FALSE	Camelus dromedarius
KP719928.1	Coronaviridae_26	Middle East respiratory syndrome coronavirus isolate Camel/UAE/D1164.10/2014, complete genome	Coronaviridae	Betacoronavirus	Middle East respiratory syndrome-related coronavirus		2014-06-15	United Arab Emirates	29559	ssRNA(+)	FALSE	FALSE	Camelus dromedarius
KP719929.1	Coronaviridae_26	Middle East respiratory syndrome coronavirus isolate Camel/UAE/D1164.11/2014, complete genome	Coronaviridae	Betacoronavirus	Middle East respiratory syndrome-related coronavirus		2014-06-15	United Arab Emirates	29559	ssRNA(+)	FALSE	FALSE	Camelus dromedarius
KP719930.1	Coronaviridae_26	Middle East respiratory syndrome coronavirus isolate Camel/UAE/D1164.14/2014, complete genome	Coronaviridae	Betacoronavirus	Middle East respiratory syndrome-related coronavirus		2014-06-15	United Arab Emirates	29559	ssRNA(+)	FALSE	FALSE	Camelus dromedarius
KP719931.1	Coronaviridae_26	Middle East respiratory syndrome coronavirus isolate Camel/UAE/D1339.2/2014, complete genome	Coronaviridae	Betacoronavirus	Middle East respiratory syndrome-related coronavirus		2014-06-15	United Arab Emirates	29559	ssRNA(+)	FALSE	FALSE	Camelus dromedarius
KP719932.1	Coronaviridae_26	Middle East respiratory syndrome coronavirus isolate Camel/UAE/D1243.12/2014, complete genome	Coronaviridae	Betacoronavirus	Middle East respiratory syndrome-related coronavirus		2014-06-15	United Arab Emirates	29559	ssRNA(+)	FALSE	FALSE	Camelus dromedarius
KP728470.1	Coronaviridae_17	Porcine epidemic diarrhea virus strain SQ2014, complete genome	Coronaviridae	Alphacoronavirus	Porcine epidemic diarrhea virus	abdominal cavity	2014-03-05	China	27953	ssRNA(+)	FALSE	FALSE	Sus scrofa
KP757890.1	Coronaviridae_18	Porcine deltacoronavirus isolate CHN-AH-2004, complete genome	Coronaviridae	Deltacoronavirus	Coronavirus HKU15	abdominal cavity	2004-05-24	China	25420	ssRNA(+)	FALSE	FALSE	Sus scrofa
KP757891.1	Coronaviridae_18	Porcine deltacoronavirus isolate CHN-HB-2014, complete genome	Coronaviridae	Deltacoronavirus	Coronavirus HKU15	feces	2014-12-26	China	25420	ssRNA(+)	FALSE	FALSE	Sus scrofa
KP757892.1	Coronaviridae_18	Porcine deltacoronavirus isolate CHN-JS-2014, complete genome	Coronaviridae	Deltacoronavirus	Coronavirus HKU15	feces	2014-12-20	China	25420	ssRNA(+)	FALSE	FALSE	Sus scrofa
KP765609.1	Coronaviridae_17	Porcine epidemic diarrhea virus strain FL2013, complete genome	Coronaviridae	Alphacoronavirus	Porcine epidemic diarrhea virus		2013-07-15	China	28056	ssRNA(+)	FALSE	FALSE	Sus scrofa
KP780179.1	Coronaviridae_6	Infectious bronchitis virus strain gammaCoV/Ck/Italy/I2022/13, complete genome	Coronaviridae	Gammacoronavirus	Avian coronavirus	embryo	2013-05-13	Italy	27403	ssRNA(+)	FALSE	FALSE	Gallus gallus
KP790143.1	Coronaviridae_6	Infectious bronchitis virus strain CK/CH/LDL/140520, complete genome	Coronaviridae	Gammacoronavirus	Avian coronavirus		2014-06-01	China	27712	ssRNA(+)	FALSE	FALSE	Gallus gallus
KP790144.1	Coronaviridae_6	Infectious bronchitis virus strain CK/CH/LHLJ/140756, complete genome	Coronaviridae	Gammacoronavirus	Avian coronavirus		2014-06-01	China	27682	ssRNA(+)	FALSE	FALSE	Gallus gallus
KP790145.1	Coronaviridae_6	Infectious bronchitis virus strain CK/CH/LHLJ/141105, complete genome	Coronaviridae	Gammacoronavirus	Avian coronavirus		2014-06-01	China	27681	ssRNA(+)	FALSE	FALSE	Gallus gallus
KP790146.1	Coronaviridae_6	Infectious bronchitis virus strain CK/CH/LHLJ/140901, complete genome	Coronaviridae	Gammacoronavirus	Avian coronavirus		2014-06-01	China	27672	ssRNA(+)	FALSE	FALSE	Gallus gallus
KP868572.1	Coronaviridae_6	Infectious bronchitis virus strain ck/CH/LHLJ/111043, complete genome	Coronaviridae	Gammacoronavirus	Avian coronavirus		2011-06-01	China	27452	ssRNA(+)	FALSE	FALSE	Gallus gallus
KP868573.1	Coronaviridae_6	Infectious bronchitis virus strain CK/CH/LJL/130908, complete genome	Coronaviridae	Gammacoronavirus	Avian coronavirus		2013-06-01	China	27601	ssRNA(+)	FALSE	FALSE	Gallus gallus
KP886808.1	Coronaviridae_3	Bat SARS-like coronavirus YNLF_31C, complete genome	Coronaviridae	Betacoronavirus	Severe acute respiratory syndrome-related coronavirus		2013-05-23	China	29723	ssRNA(+)	FALSE	FALSE	Rhinolophus ferrumequinum
KP886809.1	Coronaviridae_3	Bat SARS-like coronavirus YNLF_34C, complete genome	Coronaviridae	Betacoronavirus	Severe acute respiratory syndrome-related coronavirus		2013-05-23	China	29723	ssRNA(+)	FALSE	FALSE	Rhinolophus ferrumequinum
KP887098.1	Coronaviridae_1	UNVERIFIED: Murine coronavirus strain AM2, complete genome	Coronaviridae	Betacoronavirus	Murine coronavirus		2014-07-01	USA	31409	ssRNA(+)	FALSE	FALSE
KP890336.1	Coronaviridae_17	Porcine epidemic diarrhea virus strain CH/HNYF/14, complete genome	Coronaviridae	Alphacoronavirus	Porcine epidemic diarrhea virus		2014-12-15	China	27996	ssRNA(+)	FALSE	FALSE	Sus scrofa
KP981644.1	Coronaviridae_5	Canine coronavirus strain CB/05, complete genome	Coronaviridae	Alphacoronavirus	Alphacoronavirus 1	lung	2005-06-01	Italy	29278	ssRNA(+)	FALSE	FALSE	Canis lupus familiaris
KR003452.1	Coronaviridae_17	Porcine epidemic diarrhea virus isolate 15V010/BEL/2015, complete genome	Coronaviridae	Alphacoronavirus	Porcine epidemic diarrhea virus	feces	2015-01-15	Belgium	28028	ssRNA(+)	FALSE	FALSE	Sus scrofa
KR011263.1	Coronaviridae_26	Middle East respiratory syndrome coronavirus strain Hu/Riyadh-KSA-2345/2015, complete genome	Coronaviridae	Betacoronavirus	Middle East respiratory syndrome-related coronavirus	lung, oronasopharynx	2015-01-21	Saudi Arabia	30096	ssRNA(+)	FALSE	FALSE	Homo sapiens
KR011265.1	Coronaviridae_26	Middle East respiratory syndrome coronavirus strain Hu/Riyadh-KSA-2466/2015, complete genome	Coronaviridae	Betacoronavirus	Middle East respiratory syndrome-related coronavirus	lung, oronasopharynx	2015-01-26	Saudi Arabia	30096	ssRNA(+)	FALSE	FALSE	Homo sapiens
KR011266.1	Coronaviridae_26	Middle East respiratory syndrome coronavirus strain Hu/Riyadh-KSA-2049/2015, complete genome	Coronaviridae	Betacoronavirus	Middle East respiratory syndrome-related coronavirus	lung, oronasopharynx	2015-01-06	Saudi Arabia	30096	ssRNA(+)	FALSE	FALSE	Homo sapiens
KR011756.1	Coronaviridae_17	Porcine epidemic diarrhea virus strain FR/001/2014, complete genome	Coronaviridae	Alphacoronavirus	Porcine epidemic diarrhea virus	abdominal cavity	2014-12-01	France	28024	ssRNA(+)	FALSE	FALSE	Sus scrofa
KR061458.1	Coronaviridae_17	Porcine epidemic diarrhea virus strain Italy/7239/2009, complete genome	Coronaviridae	Alphacoronavirus	Porcine epidemic diarrhea virus		2009-01-14	Italy	27986	ssRNA(+)	FALSE	FALSE	Sus scrofa
KR061459.1	Coronaviridae_5	Swine enteric coronavirus strain Italy/213306/2009, complete genome	Coronaviridae	Alphacoronavirus	Alphacoronavirus 1		2009-09-04	Italy	28111	ssRNA(+)	FALSE	FALSE	Sus scrofa
KR078299.1	Coronaviridae_17	Porcine epidemic diarrhea virus strain PC21A, complete genome	Coronaviridae	Alphacoronavirus	Porcine epidemic diarrhea virus		2013-06-15	USA	28007	ssRNA(+)	FALSE	FALSE	Sus scrofa
KR078300.1	Coronaviridae_17	Porcine epidemic diarrhea virus strain PC177, complete genome	Coronaviridae	Alphacoronavirus	Porcine epidemic diarrhea virus	feces, abdominal cavity	2013-12-15	USA	28028	ssRNA(+)	FALSE	FALSE	Sus scrofa
KR095279.1	Coronaviridae_17	Porcine epidemic diarrhea virus strain CH/HNQX-3/14, complete genome	Coronaviridae	Alphacoronavirus	Porcine epidemic diarrhea virus		2015-01-27	China	27997	ssRNA(+)	FALSE	FALSE	Sus scrofa
KR131621.1	Coronaviridae_18	Porcine deltacoronavirus isolate PDCoV/CHJXNI2/2015, complete genome	Coronaviridae	Deltacoronavirus	Coronavirus HKU15		2015-03-15	China	25438	ssRNA(+)	FALSE	FALSE	Sus scrofa
KR150443.1	Coronaviridae_18	Porcine deltacoronavirus strain USA/Arkansas61/2015, complete genome	Coronaviridae	Deltacoronavirus	Coronavirus HKU15		2015-03-24	USA	25398	ssRNA(+)	FALSE	FALSE	Sus scrofa
KR153325.1	Coronaviridae_17	Porcine epidemic diarrhea virus strain CH/GDZH02/1401, complete genome	Coronaviridae	Alphacoronavirus	Porcine epidemic diarrhea virus	abdominal cavity	2014-01-01	China	27995	ssRNA(+)	FALSE	FALSE	Sus scrofa
KR153326.1	Coronaviridae_17	Porcine epidemic diarrhea virus strain CH/GDZHDM/1401, complete genome	Coronaviridae	Alphacoronavirus	Porcine epidemic diarrhea virus	abdominal cavity	2014-01-04	China	27993	ssRNA(+)	FALSE	FALSE	Sus scrofa
KR231009.1	Coronaviridae_6	Infectious bronchitis virus strain B1648, complete genome	Coronaviridae	Gammacoronavirus	Avian coronavirus		1984-06-01	Belgium	27654	ssRNA(+)	FALSE	FALSE	Gallus gallus
KR265759.1	Coronaviridae_17	Porcine epidemic diarrhea virus strain USA/Minnesota187/2014 from USA, complete genome	Coronaviridae	Alphacoronavirus	Porcine epidemic diarrhea virus		2014-01-14	USA	27984	ssRNA(+)	FALSE	FALSE	Sus scrofa
KR265760.1	Coronaviridae_17	Porcine epidemic diarrhea virus strain USA/Minnesota211/2014 from USA, complete genome	Coronaviridae	Alphacoronavirus	Porcine epidemic diarrhea virus		2014-02-12	USA	27986	ssRNA(+)	FALSE	FALSE	Sus scrofa
KR265761.1	Coronaviridae_17	Porcine epidemic diarrhea virus strain USA/Hawaii/2014 from USA, complete genome	Coronaviridae	Alphacoronavirus	Porcine epidemic diarrhea virus		2014-11-13	USA	27979	ssRNA(+)	FALSE	FALSE	Sus scrofa
KR265762.1	Coronaviridae_17	Porcine epidemic diarrhea virus strain USA/Oklahoma1/2015 from USA, complete genome	Coronaviridae	Alphacoronavirus	Porcine epidemic diarrhea virus		2014-12-12	USA	27993	ssRNA(+)	FALSE	FALSE	Sus scrofa
KR265763.1	Coronaviridae_17	Porcine epidemic diarrhea virus strain USA/Illinois176/2014 from USA, complete genome	Coronaviridae	Alphacoronavirus	Porcine epidemic diarrhea virus		2014-01-03	USA	27993	ssRNA(+)	FALSE	FALSE	Sus scrofa
KR265764.1	Coronaviridae_17	Porcine epidemic diarrhea virus strain USA/Minnesota163/2014 from USA, complete genome	Coronaviridae	Alphacoronavirus	Porcine epidemic diarrhea virus		2014-02-18	USA	27992	ssRNA(+)	FALSE	FALSE	Sus scrofa
KR265765.1	Coronaviridae_17	Porcine epidemic diarrhea virus strain USA/Nebraska287/2014 from USA, complete genome	Coronaviridae	Alphacoronavirus	Porcine epidemic diarrhea virus		2014-04-02	USA	27996	ssRNA(+)	FALSE	FALSE	Sus scrofa
KR265766.1	Coronaviridae_17	Porcine epidemic diarrhea virus strain MEX/Mexico329/2014 from Mexico, complete genome	Coronaviridae	Alphacoronavirus	Porcine epidemic diarrhea virus		2014-04-24	Mexico	27993	ssRNA(+)	FALSE	FALSE	Sus scrofa
KR265767.1	Coronaviridae_17	Porcine epidemic diarrhea virus strain USA/Kansas432/2014 from USA, complete genome	Coronaviridae	Alphacoronavirus	Porcine epidemic diarrhea virus		2014-10-31	USA	27990	ssRNA(+)	FALSE	FALSE	Sus scrofa
KR265768.1	Coronaviridae_17	Porcine epidemic diarrhea virus strain USA/Minnesota179/2014 from USA, complete genome	Coronaviridae	Alphacoronavirus	Porcine epidemic diarrhea virus		2014-02-11	USA	27993	ssRNA(+)	FALSE	FALSE	Sus scrofa
KR265769.1	Coronaviridae_17	Porcine epidemic diarrhea virus strain USA/Illinois197/2014 from USA, complete genome	Coronaviridae	Alphacoronavirus	Porcine epidemic diarrhea virus		2014-03-04	USA	27993	ssRNA(+)	FALSE	FALSE	Sus scrofa
KR265770.1	Coronaviridae_17	Porcine epidemic diarrhea virus strain USA/Illinois255/2014 from USA, complete genome	Coronaviridae	Alphacoronavirus	Porcine epidemic diarrhea virus		2014-03-11	USA	27993	ssRNA(+)	FALSE	FALSE	Sus scrofa
KR265771.1	Coronaviridae_17	Porcine epidemic diarrhea virus strain USA/Minnesota402/2014 from USA, complete genome	Coronaviridae	Alphacoronavirus	Porcine epidemic diarrhea virus		2014-08-18	USA	27993	ssRNA(+)	FALSE	FALSE	Sus scrofa
KR265772.1	Coronaviridae_17	Porcine epidemic diarrhea virus strain USA/Kentucky248/2014 from USA, complete genome	Coronaviridae	Alphacoronavirus	Porcine epidemic diarrhea virus		2014-01-07	USA	27993	ssRNA(+)	FALSE	FALSE	Sus scrofa
KR265773.1	Coronaviridae_17	Porcine epidemic diarrhea virus strain USA/Minnesota281/2014 from USA, complete genome	Coronaviridae	Alphacoronavirus	Porcine epidemic diarrhea virus		2014-03-27	USA	27993	ssRNA(+)	FALSE	FALSE	Sus scrofa
KR265774.1	Coronaviridae_17	Porcine epidemic diarrhea virus strain USA/SouthDakota371/2014 from USA, complete genome	Coronaviridae	Alphacoronavirus	Porcine epidemic diarrhea virus		2014-05-16	USA	27993	ssRNA(+)	FALSE	FALSE	Sus scrofa
KR265775.1	Coronaviridae_17	Porcine epidemic diarrhea virus strain USA/Minnesota338/2014 from USA, complete genome	Coronaviridae	Alphacoronavirus	Porcine epidemic diarrhea virus		2014-01-09	USA	27991	ssRNA(+)	FALSE	FALSE	Sus scrofa
KR265776.1	Coronaviridae_17	Porcine epidemic diarrhea virus strain USA/Minnesota250/2014 from USA, complete genome	Coronaviridae	Alphacoronavirus	Porcine epidemic diarrhea virus		2014-02-03	USA	27993	ssRNA(+)	FALSE	FALSE	Sus scrofa
KR265777.1	Coronaviridae_17	Porcine epidemic diarrhea virus strain USA/Kansas275/2014 from USA, complete genome	Coronaviridae	Alphacoronavirus	Porcine epidemic diarrhea virus		2014-03-13	USA	27993	ssRNA(+)	FALSE	FALSE	Sus scrofa
KR265778.1	Coronaviridae_17	Porcine epidemic diarrhea virus strain USA/Minnesota276/2014 from USA, complete genome	Coronaviridae	Alphacoronavirus	Porcine epidemic diarrhea virus		2014-03-14	USA	27993	ssRNA(+)	FALSE	FALSE	Sus scrofa
KR265779.1	Coronaviridae_17	Porcine epidemic diarrhea virus strain USA/Missouri177/2014 from USA, complete genome	Coronaviridae	Alphacoronavirus	Porcine epidemic diarrhea virus		2014-01-14	USA	27990	ssRNA(+)	FALSE	FALSE	Sus scrofa
KR265780.1	Coronaviridae_17	Porcine epidemic diarrhea virus strain USA/Ohio343/2014 from USA, complete genome	Coronaviridae	Alphacoronavirus	Porcine epidemic diarrhea virus		2014-01-17	USA	27993	ssRNA(+)	FALSE	FALSE	Sus scrofa
KR265781.1	Coronaviridae_17	Porcine epidemic diarrhea virus strain USA/Ohio295/2014 from USA, complete genome	Coronaviridae	Alphacoronavirus	Porcine epidemic diarrhea virus		2014-02-25	USA	27993	ssRNA(+)	FALSE	FALSE	Sus scrofa
KR265782.1	Coronaviridae_17	Porcine epidemic diarrhea virus strain USA/Illinois308/2014 from USA, complete genome	Coronaviridae	Alphacoronavirus	Porcine epidemic diarrhea virus		2014-04-16	USA	27993	ssRNA(+)	FALSE	FALSE	Sus scrofa
KR265783.1	Coronaviridae_17	Porcine epidemic diarrhea virus strain USA/Minnesota269/2014 from USA, complete genome	Coronaviridae	Alphacoronavirus	Porcine epidemic diarrhea virus		2014-02-14	USA	27993	ssRNA(+)	FALSE	FALSE	Sus scrofa
KR265784.1	Coronaviridae_17	Porcine epidemic diarrhea virus strain USA/Nebraska348/2014 from USA, complete genome	Coronaviridae	Alphacoronavirus	Porcine epidemic diarrhea virus		2014-02-25	USA	27993	ssRNA(+)	FALSE	FALSE	Sus scrofa
KR265785.1	Coronaviridae_17	Porcine epidemic diarrhea virus strain USA/Illinois259/2014 from USA, complete genome	Coronaviridae	Alphacoronavirus	Porcine epidemic diarrhea virus		2014-03-13	USA	27993	ssRNA(+)	FALSE	FALSE	Sus scrofa
KR265786.1	Coronaviridae_17	Porcine epidemic diarrhea virus strain USA/Illinois261/2014 from USA, complete genome	Coronaviridae	Alphacoronavirus	Porcine epidemic diarrhea virus		2014-03-14	USA	27993	ssRNA(+)	FALSE	FALSE	Sus scrofa
KR265787.1	Coronaviridae_17	Porcine epidemic diarrhea virus strain USA/SouthDakota285/2014 from USA, complete genome	Coronaviridae	Alphacoronavirus	Porcine epidemic diarrhea virus		2014-04-02	USA	27993	ssRNA(+)	FALSE	FALSE	Sus scrofa
KR265788.1	Coronaviridae_17	Porcine epidemic diarrhea virus strain USA/Minnesota306/2014 from USA, complete genome	Coronaviridae	Alphacoronavirus	Porcine epidemic diarrhea virus		2014-04-08	USA	27992	ssRNA(+)	FALSE	FALSE	Sus scrofa
KR265789.1	Coronaviridae_17	Porcine epidemic diarrhea virus strain USA/Illinois307/2014 from USA, complete genome	Coronaviridae	Alphacoronavirus	Porcine epidemic diarrhea virus		2014-04-16	USA	27993	ssRNA(+)	FALSE	FALSE	Sus scrofa
KR265790.1	Coronaviridae_17	Porcine epidemic diarrhea virus strain USA/Texas424/2014 from USA, complete genome	Coronaviridae	Alphacoronavirus	Porcine epidemic diarrhea virus		2014-10-14	USA	27993	ssRNA(+)	FALSE	FALSE	Sus scrofa
KR265791.1	Coronaviridae_17	Porcine epidemic diarrhea virus strain USA/Kentucky291/2014 from USA, complete genome	Coronaviridae	Alphacoronavirus	Porcine epidemic diarrhea virus		2014-01-29	USA	27993	ssRNA(+)	FALSE	FALSE	Sus scrofa
KR265792.1	Coronaviridae_17	Porcine epidemic diarrhea virus strain USA/Oklahoma418/2014 from USA, complete genome	Coronaviridae	Alphacoronavirus	Porcine epidemic diarrhea virus		2014-09-26	USA	27990	ssRNA(+)	FALSE	FALSE	Sus scrofa
KR265793.1	Coronaviridae_17	Porcine epidemic diarrhea virus strain USA/Minnesota212/2014 from USA, complete genome	Coronaviridae	Alphacoronavirus	Porcine epidemic diarrhea virus		2014-02-13	USA	27993	ssRNA(+)	FALSE	FALSE	Sus scrofa
KR265794.1	Coronaviridae_17	Porcine epidemic diarrhea virus strain USA/Minnesota236/2014 from USA, complete genome	Coronaviridae	Alphacoronavirus	Porcine epidemic diarrhea virus		2014-03-04	USA	27993	ssRNA(+)	FALSE	FALSE	Sus scrofa
KR265795.1	Coronaviridae_17	Porcine epidemic diarrhea virus strain USA/Illinois201/2014 from USA, complete genome	Coronaviridae	Alphacoronavirus	Porcine epidemic diarrhea virus		2014-03-07	USA	27993	ssRNA(+)	FALSE	FALSE	Sus scrofa
KR265796.1	Coronaviridae_17	Porcine epidemic diarrhea virus strain USA/Illinois262/2014 from USA, complete genome	Coronaviridae	Alphacoronavirus	Porcine epidemic diarrhea virus		2014-03-19	USA	27993	ssRNA(+)	FALSE	FALSE	Sus scrofa
KR265797.1	Coronaviridae_17	Porcine epidemic diarrhea virus strain USA/Kansas280/2014 from USA, complete genome	Coronaviridae	Alphacoronavirus	Porcine epidemic diarrhea virus		2014-03-27	USA	27993	ssRNA(+)	FALSE	FALSE	Sus scrofa
KR265798.1	Coronaviridae_17	Porcine epidemic diarrhea virus strain USA/Minnesota289/2014 from USA, complete genome	Coronaviridae	Alphacoronavirus	Porcine epidemic diarrhea virus		2014-04-02	USA	27993	ssRNA(+)	FALSE	FALSE	Sus scrofa
KR265799.1	Coronaviridae_17	Porcine epidemic diarrhea virus strain USA/Minnesota159/2014 from USA, complete genome	Coronaviridae	Alphacoronavirus	Porcine epidemic diarrhea virus		2014-02-12	USA	27993	ssRNA(+)	FALSE	FALSE	Sus scrofa
KR265800.1	Coronaviridae_17	Porcine epidemic diarrhea virus strain USA/Indiana195/2014 from USA, complete genome	Coronaviridae	Alphacoronavirus	Porcine epidemic diarrhea virus		2014-03-04	USA	27993	ssRNA(+)	FALSE	FALSE	Sus scrofa
KR265801.1	Coronaviridae_17	Porcine epidemic diarrhea virus strain USA/Indiana254/2014 from USA, complete genome	Coronaviridae	Alphacoronavirus	Porcine epidemic diarrhea virus		2014-03-12	USA	27993	ssRNA(+)	FALSE	FALSE	Sus scrofa
KR265802.1	Coronaviridae_17	Porcine epidemic diarrhea virus strain USA/Illinois260/2014 from USA, complete genome	Coronaviridae	Alphacoronavirus	Porcine epidemic diarrhea virus		2014-03-14	USA	27993	ssRNA(+)	FALSE	FALSE	Sus scrofa
KR265803.1	Coronaviridae_17	Porcine epidemic diarrhea virus strain USA/Nebraska288/2014 from USA, complete genome	Coronaviridae	Alphacoronavirus	Porcine epidemic diarrhea virus		2014-04-02	USA	27996	ssRNA(+)	FALSE	FALSE	Sus scrofa
KR265804.1	Coronaviridae_17	Porcine epidemic diarrhea virus strain USA/Illinois333/2014 from USA, complete genome	Coronaviridae	Alphacoronavirus	Porcine epidemic diarrhea virus		2014-05-14	USA	27993	ssRNA(+)	FALSE	FALSE	Sus scrofa
KR265805.1	Coronaviridae_17	Porcine epidemic diarrhea virus strain USA/Iowa161/2014 from USA, complete genome	Coronaviridae	Alphacoronavirus	Porcine epidemic diarrhea virus		2014-02-17	USA	27988	ssRNA(+)	FALSE	FALSE	Sus scrofa
KR265806.1	Coronaviridae_17	Porcine epidemic diarrhea virus strain USA/Minnesota312/2014 from USA, complete genome	Coronaviridae	Alphacoronavirus	Porcine epidemic diarrhea virus		2014-04-07	USA	27988	ssRNA(+)	FALSE	FALSE	Sus scrofa
KR265807.1	Coronaviridae_17	Porcine epidemic diarrhea virus strain USA/Michigan189/2014 from USA, complete genome	Coronaviridae	Alphacoronavirus	Porcine epidemic diarrhea virus		2014-02-17	USA	27988	ssRNA(+)	FALSE	FALSE	Sus scrofa
KR265808.1	Coronaviridae_17	Porcine epidemic diarrhea virus strain USA/Iowa162/2014 from USA, complete genome	Coronaviridae	Alphacoronavirus	Porcine epidemic diarrhea virus		2014-02-17	USA	27988	ssRNA(+)	FALSE	FALSE	Sus scrofa
KR265809.1	Coronaviridae_17	Porcine epidemic diarrhea virus strain USA/Nebraska266/2014 from USA, complete genome	Coronaviridae	Alphacoronavirus	Porcine epidemic diarrhea virus		2014-03-25	USA	27988	ssRNA(+)	FALSE	FALSE	Sus scrofa
KR265810.1	Coronaviridae_17	Porcine epidemic diarrhea virus strain USA/Oklahoma320/2014 from USA, complete genome	Coronaviridae	Alphacoronavirus	Porcine epidemic diarrhea virus		2014-04-24	USA	27988	ssRNA(+)	FALSE	FALSE	Sus scrofa
KR265811.1	Coronaviridae_17	Porcine epidemic diarrhea virus strain USA/SouthDakota336/2014 from USA, complete genome	Coronaviridae	Alphacoronavirus	Porcine epidemic diarrhea virus		2014-04-30	USA	27993	ssRNA(+)	FALSE	FALSE	Sus scrofa
KR265812.1	Coronaviridae_17	Porcine epidemic diarrhea virus strain USA/Colorado420/2014 from USA, complete genome	Coronaviridae	Alphacoronavirus	Porcine epidemic diarrhea virus		2014-09-30	USA	27993	ssRNA(+)	FALSE	FALSE	Sus scrofa
KR265813.1	Coronaviridae_17	Porcine epidemic diarrhea virus strain USA/Minnesota271/2014 from USA, complete genome	Coronaviridae	Alphacoronavirus	Porcine epidemic diarrhea virus		2014-02-20	USA	27993	ssRNA(+)	FALSE	FALSE	Sus scrofa
KR265814.1	Coronaviridae_17	Porcine epidemic diarrhea virus strain USA/Kansas166/2014 from USA, complete genome	Coronaviridae	Alphacoronavirus	Porcine epidemic diarrhea virus		2014-02-28	USA	27991	ssRNA(+)	FALSE	FALSE	Sus scrofa
KR265815.1	Coronaviridae_17	Porcine epidemic diarrhea virus strain USA/Illinois194/2014 from USA, complete genome	Coronaviridae	Alphacoronavirus	Porcine epidemic diarrhea virus		2014-03-03	USA	27993	ssRNA(+)	FALSE	FALSE	Sus scrofa
KR265816.1	Coronaviridae_17	Porcine epidemic diarrhea virus strain USA/Minnesota202/2014 from USA, complete genome	Coronaviridae	Alphacoronavirus	Porcine epidemic diarrhea virus		2014-03-10	USA	27993	ssRNA(+)	FALSE	FALSE	Sus scrofa
KR265817.1	Coronaviridae_17	Porcine epidemic diarrhea virus strain USA/Illinois256/2014 from USA, complete genome	Coronaviridae	Alphacoronavirus	Porcine epidemic diarrhea virus		2014-03-11	USA	27993	ssRNA(+)	FALSE	FALSE	Sus scrofa
KR265818.1	Coronaviridae_17	Porcine epidemic diarrhea virus strain USA/Minnesota290/2014 from USA, complete genome	Coronaviridae	Alphacoronavirus	Porcine epidemic diarrhea virus		2014-04-03	USA	27993	ssRNA(+)	FALSE	FALSE	Sus scrofa
KR265819.1	Coronaviridae_17	Porcine epidemic diarrhea virus strain USA/Kansas431/2014 from USA, complete genome	Coronaviridae	Alphacoronavirus	Porcine epidemic diarrhea virus		2014-10-30	USA	27993	ssRNA(+)	FALSE	FALSE	Sus scrofa
KR265820.1	Coronaviridae_17	Porcine epidemic diarrhea virus strain USA/Missouri337/2014 from USA, complete genome	Coronaviridae	Alphacoronavirus	Porcine epidemic diarrhea virus		2014-05-07	USA	27986	ssRNA(+)	FALSE	FALSE	Sus scrofa
KR265821.1	Coronaviridae_17	Porcine epidemic diarrhea virus strain USA/Missouri164/2014 from USA, complete genome	Coronaviridae	Alphacoronavirus	Porcine epidemic diarrhea virus		2014-02-26	USA	27989	ssRNA(+)	FALSE	FALSE	Sus scrofa
KR265822.1	Coronaviridae_17	Porcine epidemic diarrhea virus strain USA/Michigan252/2014 from USA, complete genome	Coronaviridae	Alphacoronavirus	Porcine epidemic diarrhea virus		2014-03-04	USA	27993	ssRNA(+)	FALSE	FALSE	Sus scrofa
KR265823.1	Coronaviridae_17	Porcine epidemic diarrhea virus strain USA/Colorado203/2014 from USA, complete genome	Coronaviridae	Alphacoronavirus	Porcine epidemic diarrhea virus		2014-03-11	USA	27993	ssRNA(+)	FALSE	FALSE	Sus scrofa
KR265824.1	Coronaviridae_17	Porcine epidemic diarrhea virus strain USA/Oklahoma471/2014 from USA, complete genome	Coronaviridae	Alphacoronavirus	Porcine epidemic diarrhea virus		2014-12-04	USA	27993	ssRNA(+)	FALSE	FALSE	Sus scrofa
KR265825.1	Coronaviridae_17	Porcine epidemic diarrhea virus strain USA/Minnesota200/2014 from USA, complete genome	Coronaviridae	Alphacoronavirus	Porcine epidemic diarrhea virus		2014-03-05	USA	27988	ssRNA(+)	FALSE	FALSE	Sus scrofa
KR265826.1	Coronaviridae_17	Porcine epidemic diarrhea virus strain USA/Illinois258/2014 from USA, complete genome	Coronaviridae	Alphacoronavirus	Porcine epidemic diarrhea virus		2014-03-13	USA	27993	ssRNA(+)	FALSE	FALSE	Sus scrofa
KR265827.1	Coronaviridae_17	Porcine epidemic diarrhea virus strain USA/Iowa303/2014 from USA, complete genome	Coronaviridae	Alphacoronavirus	Porcine epidemic diarrhea virus		2014-04-07	USA	27993	ssRNA(+)	FALSE	FALSE	Sus scrofa
KR265828.1	Coronaviridae_17	Porcine epidemic diarrhea virus strain USA/Minnesota265/2014 from USA, complete genome	Coronaviridae	Alphacoronavirus	Porcine epidemic diarrhea virus		2014-03-24	USA	27993	ssRNA(+)	FALSE	FALSE	Sus scrofa
KR265829.1	Coronaviridae_17	Porcine epidemic diarrhea virus strain USA/Minnesota309/2014 from USA, complete genome	Coronaviridae	Alphacoronavirus	Porcine epidemic diarrhea virus		2014-04-17	USA	27989	ssRNA(+)	FALSE	FALSE	Sus scrofa
KR265830.1	Coronaviridae_17	Porcine epidemic diarrhea virus strain USA/Ohio300/2014 from USA, complete genome	Coronaviridae	Alphacoronavirus	Porcine epidemic diarrhea virus		2014-04-03	USA	27989	ssRNA(+)	FALSE	FALSE	Sus scrofa
KR265831.1	Coronaviridae_17	Porcine epidemic diarrhea virus strain CAN/Quebec334/2014 from Canada, complete genome	Coronaviridae	Alphacoronavirus	Porcine epidemic diarrhea virus		2014-05-14	Canada	27988	ssRNA(+)	FALSE	FALSE	Sus scrofa
KR265832.1	Coronaviridae_17	Porcine epidemic diarrhea virus strain USA/Minnesota379/2014 from USA, complete genome	Coronaviridae	Alphacoronavirus	Porcine epidemic diarrhea virus		2014-06-10	USA	27993	ssRNA(+)	FALSE	FALSE	Sus scrofa
KR265833.1	Coronaviridae_17	Porcine epidemic diarrhea virus strain USA/Oklahoma477/2014 from USA, complete genome	Coronaviridae	Alphacoronavirus	Porcine epidemic diarrhea virus		2014-12-12	USA	27993	ssRNA(+)	FALSE	FALSE	Sus scrofa
KR265834.1	Coronaviridae_17	Porcine epidemic diarrhea virus strain USA/Texas435/2014 from USA, complete genome	Coronaviridae	Alphacoronavirus	Porcine epidemic diarrhea virus		2014-11-18	USA	27982	ssRNA(+)	FALSE	FALSE	Sus scrofa
KR265840.1	Coronaviridae_17	Porcine epidemic diarrhea virus strain USA/Ohio249/2014 from USA, complete genome	Coronaviridae	Alphacoronavirus	Porcine epidemic diarrhea virus		2014-01-22	USA	27994	ssRNA(+)	FALSE	FALSE	Sus scrofa
KR265841.1	Coronaviridae_17	Porcine epidemic diarrhea virus strain USA/Minnesota408/2014 from USA, complete genome	Coronaviridae	Alphacoronavirus	Porcine epidemic diarrhea virus		2014-08-28	USA	27993	ssRNA(+)	FALSE	FALSE	Sus scrofa
KR265842.1	Coronaviridae_17	Porcine epidemic diarrhea virus strain USA/Minnesota409/2014 from USA, complete genome	Coronaviridae	Alphacoronavirus	Porcine epidemic diarrhea virus		2014-08-28	USA	27988	ssRNA(+)	FALSE	FALSE	Sus scrofa
KR265843.1	Coronaviridae_17	Porcine epidemic diarrhea virus strain USA/Minnesota372/2014 from USA, complete genome	Coronaviridae	Alphacoronavirus	Porcine epidemic diarrhea virus		2014-05-23	USA	27990	ssRNA(+)	FALSE	FALSE	Sus scrofa
KR265844.1	Coronaviridae_17	Porcine epidemic diarrhea virus strain USA/Missouri373/2014 from USA, complete genome	Coronaviridae	Alphacoronavirus	Porcine epidemic diarrhea virus		2014-05-30	USA	27993	ssRNA(+)	FALSE	FALSE	Sus scrofa
KR265845.1	Coronaviridae_17	Porcine epidemic diarrhea virus strain USA/Oklahoma466/2014 from USA, complete genome	Coronaviridae	Alphacoronavirus	Porcine epidemic diarrhea virus		2014-12-04	USA	27993	ssRNA(+)	FALSE	FALSE	Sus scrofa
KR265846.1	Coronaviridae_17	Porcine epidemic diarrhea virus strain USA/Missouri270/2014 from USA, complete genome	Coronaviridae	Alphacoronavirus	Porcine epidemic diarrhea virus		2014-02-18	USA	27993	ssRNA(+)	FALSE	FALSE	Sus scrofa
KR265847.1	Coronaviridae_18	Porcine deltacoronavirus strain USA/Minnesota442/2014, complete genome	Coronaviridae	Deltacoronavirus	Coronavirus HKU15		2014-03-06	USA	25394	ssRNA(+)	FALSE	FALSE	Sus scrofa
KR265848.1	Coronaviridae_18	Porcine deltacoronavirus strain USA/Minnesota214/2014, complete genome	Coronaviridae	Deltacoronavirus	Coronavirus HKU15		2014-03-14	USA	25396	ssRNA(+)	FALSE	FALSE	Sus scrofa
KR265849.1	Coronaviridae_18	Porcine deltacoronavirus strain USA/Michigan447/2014, complete genome	Coronaviridae	Deltacoronavirus	Coronavirus HKU15		2014-04-02	USA	25393	ssRNA(+)	FALSE	FALSE	Sus scrofa
KR265850.1	Coronaviridae_18	Porcine deltacoronavirus strain USA/Michigan448/2014, complete genome	Coronaviridae	Deltacoronavirus	Coronavirus HKU15		2014-04-02	USA	25394	ssRNA(+)	FALSE	FALSE	Sus scrofa
KR265851.1	Coronaviridae_18	Porcine deltacoronavirus strain USA/Indiana453/2014, complete genome	Coronaviridae	Deltacoronavirus	Coronavirus HKU15		2014-05-13	USA	25394	ssRNA(+)	FALSE	FALSE	Sus scrofa
KR265852.1	Coronaviridae_18	Porcine deltacoronavirus strain USA/Illinois449/2014, complete genome	Coronaviridae	Deltacoronavirus	Coronavirus HKU15		2014-04-21	USA	25394	ssRNA(+)	FALSE	FALSE	Sus scrofa
KR265853.1	Coronaviridae_18	Porcine deltacoronavirus strain USA/Minnesota/2013, complete genome	Coronaviridae	Deltacoronavirus	Coronavirus HKU15		2013-10-14	USA	25394	ssRNA(+)	FALSE	FALSE	Sus scrofa
KR265854.1	Coronaviridae_18	Porcine deltacoronavirus strain USA/Minnesota454/2014, complete genome	Coronaviridae	Deltacoronavirus	Coronavirus HKU15		2014-05-21	USA	25394	ssRNA(+)	FALSE	FALSE	Sus scrofa
KR265855.1	Coronaviridae_18	Porcine deltacoronavirus strain USA/Minnesota455/2014, complete genome	Coronaviridae	Deltacoronavirus	Coronavirus HKU15		2014-05-21	USA	25394	ssRNA(+)	FALSE	FALSE	Sus scrofa
KR265856.1	Coronaviridae_18	Porcine deltacoronavirus strain USA/Illinois272/2014, complete genome	Coronaviridae	Deltacoronavirus	Coronavirus HKU15		2014-02-23	USA	25399	ssRNA(+)	FALSE	FALSE	Sus scrofa
KR265857.1	Coronaviridae_18	Porcine deltacoronavirus strain USA/Illinois273/2014, complete genome	Coronaviridae	Deltacoronavirus	Coronavirus HKU15		2014-02-23	USA	25394	ssRNA(+)	FALSE	FALSE	Sus scrofa
KR265858.1	Coronaviridae_18	Porcine deltacoronavirus strain USA/NorthCarolina452/2014, complete genome	Coronaviridae	Deltacoronavirus	Coronavirus HKU15		2014-05-06	USA	25394	ssRNA(+)	FALSE	FALSE	Sus scrofa
KR265859.1	Coronaviridae_18	Porcine deltacoronavirus strain USA/Minnesota159/2014, complete genome	Coronaviridae	Deltacoronavirus	Coronavirus HKU15		2014-02-11	USA	25401	ssRNA(+)	FALSE	FALSE	Sus scrofa
KR265860.1	Coronaviridae_18	Porcine deltacoronavirus strain USA/Nebraska209/2014, complete genome	Coronaviridae	Deltacoronavirus	Coronavirus HKU15		2014-02-05	USA	25396	ssRNA(+)	FALSE	FALSE	Sus scrofa
KR265861.1	Coronaviridae_18	Porcine deltacoronavirus strain USA/Nebraska210/2014, complete genome	Coronaviridae	Deltacoronavirus	Coronavirus HKU15		2014-02-05	USA	25404	ssRNA(+)	FALSE	FALSE	Sus scrofa
KR265862.1	Coronaviridae_18	Porcine deltacoronavirus strain USA/Ohio444/2014, complete genome	Coronaviridae	Deltacoronavirus	Coronavirus HKU15		2014-03-26	USA	25394	ssRNA(+)	FALSE	FALSE	Sus scrofa
KR265863.1	Coronaviridae_18	Porcine deltacoronavirus strain USA/Ohio445/2014, complete genome	Coronaviridae	Deltacoronavirus	Coronavirus HKU15		2014-03-27	USA	25394	ssRNA(+)	FALSE	FALSE	Sus scrofa
KR265864.1	Coronaviridae_18	Porcine deltacoronavirus strain USA/Minnesota292/2014, complete genome	Coronaviridae	Deltacoronavirus	Coronavirus HKU15		2014-03-14	USA	25395	ssRNA(+)	FALSE	FALSE	Sus scrofa
KR265865.1	Coronaviridae_18	Porcine deltacoronavirus strain USA/Iowa459/2014, complete genome	Coronaviridae	Deltacoronavirus	Coronavirus HKU15		2014-06-05	USA	25394	ssRNA(+)	FALSE	FALSE	Sus scrofa
KR270796.1	Coronaviridae_5	Porcine respiratory coronavirus strain OH7269, complete genome	Coronaviridae	Alphacoronavirus	Alphacoronavirus 1		2014-07-24	USA	27765	ssRNA(+)	FALSE	FALSE	Sus scrofa
KR610991.1	Coronaviridae_17	Porcine epidemic diarrhea virus clone EAS1, complete genome	Coronaviridae	Alphacoronavirus	Porcine epidemic diarrhea virus	abdominal cavity	2014-10-10	Thailand	28033	ssRNA(+)	FALSE	FALSE	Sus scrofa
KR610992.1	Coronaviridae_17	Porcine epidemic diarrhea virus clone EAS2, complete genome	Coronaviridae	Alphacoronavirus	Porcine epidemic diarrhea virus	abdominal cavity	2014-10-10	Thailand	28033	ssRNA(+)	FALSE	FALSE	Sus scrofa
KR610993.1	Coronaviridae_17	Porcine epidemic diarrhea virus clone CBR1, complete genome	Coronaviridae	Alphacoronavirus	Porcine epidemic diarrhea virus	abdominal cavity	2014-07-15	Thailand	27409	ssRNA(+)	FALSE	FALSE	Sus scrofa
KR610994.1	Coronaviridae_17	Porcine epidemic diarrhea virus clone CBR2, complete genome	Coronaviridae	Alphacoronavirus	Porcine epidemic diarrhea virus	abdominal cavity	2014-07-15	Thailand	27409	ssRNA(+)	FALSE	FALSE	Sus scrofa
KR809885.1	Coronaviridae_17	Porcine epidemic diarrhea virus isolate CH/HNAY/2015, complete genome	Coronaviridae	Alphacoronavirus	Porcine epidemic diarrhea virus	feces	2015-03-18	China	28038	ssRNA(+)	FALSE	FALSE	Sus scrofa
KR818832.1	Coronaviridae_17	Porcine epidemic diarrhea virus strain XY2013, complete genome	Coronaviridae	Alphacoronavirus	Porcine epidemic diarrhea virus		2013-02-15	China	28047	ssRNA(+)	FALSE	FALSE	Sus scrofa
KR822424.1	Coronaviridae_6	European turkey coronavirus 080385d, complete genome	Coronaviridae	Gammacoronavirus	Avian coronavirus		2008-06-01	France	27739	ssRNA(+)	FALSE	FALSE	Meleagris gallopavo
KR873431.1	Coronaviridae_17	Porcine epidemic diarrhea virus isolate KNU-141112-feces, complete genome	Coronaviridae	Alphacoronavirus	Porcine epidemic diarrhea virus		2014-11-15	South Korea	28038	ssRNA(+)	FALSE	FALSE	Sus scrofa
KR873434.1	Coronaviridae_17	Porcine epidemic diarrhea virus isolate KNU-141112-P5, complete genome	Coronaviridae	Alphacoronavirus	Porcine epidemic diarrhea virus		2014-11-15	South Korea	28038	ssRNA(+)	FALSE	FALSE	Sus scrofa
KR873435.1	Coronaviridae_17	Porcine epidemic diarrhea virus isolate KNU-141112-P10, complete genome	Coronaviridae	Alphacoronavirus	Porcine epidemic diarrhea virus		2014-11-15	South Korea	28038	ssRNA(+)	FALSE	FALSE	Sus scrofa
KR902510.1	Coronaviridae_6	Infectious bronchitis virus isolate Ind-TN92-03, complete genome	Coronaviridae	Gammacoronavirus	Avian coronavirus	kidney	2003-06-01	India	27464	ssRNA(+)	FALSE	FALSE	Gallus gallus
KT006149.2	Coronaviridae_26	Middle East respiratory syndrome coronavirus strain ChinaGD01, complete genome	Coronaviridae	Betacoronavirus	Middle East respiratory syndrome-related coronavirus	oronasopharynx	2015-05-27	China	30114	ssRNA(+)	FALSE	FALSE	Homo sapiens
KT021227.1	Coronaviridae_17	Porcine epidemic diarrhea virus strain YN1, complete genome	Coronaviridae	Alphacoronavirus	Porcine epidemic diarrhea virus	abdominal cavity	2013-08-02	China	28038	ssRNA(+)	FALSE	FALSE	Sus scrofa
KT021228.1	Coronaviridae_17	Porcine epidemic diarrhea virus strain YN15, complete genome	Coronaviridae	Alphacoronavirus	Porcine epidemic diarrhea virus		2013-10-05	China	28034	ssRNA(+)	FALSE	FALSE	Sus scrofa
KT021229.1	Coronaviridae_17	Porcine epidemic diarrhea virus strain YN30, complete genome	Coronaviridae	Alphacoronavirus	Porcine epidemic diarrhea virus		2013-11-08	China	28028	ssRNA(+)	FALSE	FALSE	Sus scrofa
KT021230.1	Coronaviridae_17	Porcine epidemic diarrhea virus strain YN60, complete genome	Coronaviridae	Alphacoronavirus	Porcine epidemic diarrhea virus		2014-02-05	China	28028	ssRNA(+)	FALSE	FALSE	Sus scrofa
KT021231.1	Coronaviridae_17	Porcine epidemic diarrhea virus strain YN90, complete genome	Coronaviridae	Alphacoronavirus	Porcine epidemic diarrhea virus		2014-05-10	China	28028	ssRNA(+)	FALSE	FALSE	Sus scrofa
KT021232.1	Coronaviridae_17	Porcine epidemic diarrhea virus strain YN144, complete genome	Coronaviridae	Alphacoronavirus	Porcine epidemic diarrhea virus		2014-08-08	China	28028	ssRNA(+)	FALSE	FALSE	Sus scrofa
KT021233.1	Coronaviridae_17	Porcine epidemic diarrhea virus strain YN200, complete genome	Coronaviridae	Alphacoronavirus	Porcine epidemic diarrhea virus		2014-11-11	China	28028	ssRNA(+)	FALSE	FALSE	Sus scrofa
KT021234.1	Coronaviridae_18	Porcine deltacoronavirus strain CH/SXD1/2015, complete genome	Coronaviridae	Deltacoronavirus	Coronavirus HKU15		2015-03-20	China	25419	ssRNA(+)	FALSE	FALSE	Sus scrofa
KT026453.1	Coronaviridae_26	Middle East respiratory syndrome coronavirus strain Hu/Riyadh_KSA_2959_2015, complete genome	Coronaviridae	Betacoronavirus	Middle East respiratory syndrome-related coronavirus	lung	2015-02-10	Saudi Arabia	30114	ssRNA(+)	FALSE	FALSE	Homo sapiens
KT026454.1	Coronaviridae_26	Middle East respiratory syndrome coronavirus strain Hu/Riyadh_KSA_4050_2015, complete genome	Coronaviridae	Betacoronavirus	Middle East respiratory syndrome-related coronavirus	oronasopharynx	2015-03-01	Saudi Arabia	30123	ssRNA(+)	FALSE	FALSE	Homo sapiens
KT029139.1	Coronaviridae_26	Middle East respiratory syndrome coronavirus isolate MERS-CoV/KOR/KNIH/002_05_2015, complete genome	Coronaviridae	Betacoronavirus	Middle East respiratory syndrome-related coronavirus	lung, oronasopharynx	2015-05-20	South Korea	30108	ssRNA(+)	FALSE	FALSE	Homo sapiens
KT121572.1	Coronaviridae_26	Middle East respiratory syndrome coronavirus isolate KFMC-5, complete genome	Coronaviridae	Betacoronavirus	Middle East respiratory syndrome-related coronavirus		2014-05-12	Saudi Arabia	29896	ssRNA(+)	FALSE	FALSE	Homo sapiens
KT121573.1	Coronaviridae_26	Middle East respiratory syndrome coronavirus isolate KFMC-3, complete genome	Coronaviridae	Betacoronavirus	Middle East respiratory syndrome-related coronavirus		2014-05-09	Saudi Arabia	29896	ssRNA(+)	FALSE	FALSE	Homo sapiens
KT121574.1	Coronaviridae_26	Middle East respiratory syndrome coronavirus isolate KFMC-9, complete genome	Coronaviridae	Betacoronavirus	Middle East respiratory syndrome-related coronavirus		2014-05-07	Saudi Arabia	29896	ssRNA(+)	FALSE	FALSE	Homo sapiens
KT121576.1	Coronaviridae_26	Middle East respiratory syndrome coronavirus isolate KFMC-6, complete genome	Coronaviridae	Betacoronavirus	Middle East respiratory syndrome-related coronavirus		2014-05-18	Saudi Arabia	29896	ssRNA(+)	FALSE	FALSE	Homo sapiens
KT121577.1	Coronaviridae_26	Middle East respiratory syndrome coronavirus isolate KFMC-2, complete genome	Coronaviridae	Betacoronavirus	Middle East respiratory syndrome-related coronavirus		2014-05-11	Saudi Arabia	29896	ssRNA(+)	FALSE	FALSE	Homo sapiens
KT121578.1	Coronaviridae_26	Middle East respiratory syndrome coronavirus isolate KFMC-10, complete genome	Coronaviridae	Betacoronavirus	Middle East respiratory syndrome-related coronavirus		2014-05-01	Saudi Arabia	29785	ssRNA(+)	FALSE	FALSE	Homo sapiens
KT121579.1	Coronaviridae_26	Middle East respiratory syndrome coronavirus isolate KFMC-8, complete genome	Coronaviridae	Betacoronavirus	Middle East respiratory syndrome-related coronavirus		2014-04-30	Saudi Arabia	29751	ssRNA(+)	FALSE	FALSE	Homo sapiens
KT121580.1	Coronaviridae_26	Middle East respiratory syndrome coronavirus isolate KFMC-1, complete genome	Coronaviridae	Betacoronavirus	Middle East respiratory syndrome-related coronavirus		2014-04-28	Saudi Arabia	29799	ssRNA(+)	FALSE	FALSE	Homo sapiens
KT121581.1	Coronaviridae_26	Middle East respiratory syndrome coronavirus isolate KFMC-7, complete genome	Coronaviridae	Betacoronavirus	Middle East respiratory syndrome-related coronavirus		2014-05-03	Saudi Arabia	29751	ssRNA(+)	FALSE	FALSE	Homo sapiens
KT156560.1	Coronaviridae_26	Middle East respiratory syndrome coronavirus strain Hu/Oman_2285_2013, complete genome	Coronaviridae	Betacoronavirus	Middle East respiratory syndrome-related coronavirus	oronasopharynx	2013-10-28	Oman	30123	ssRNA(+)	FALSE	FALSE	Homo sapiens
KT156561.1	Coronaviridae_26	Middle East respiratory syndrome coronavirus strain Hu/Oman_2874_2013, complete genome	Coronaviridae	Betacoronavirus	Middle East respiratory syndrome-related coronavirus	oronasopharynx	2013-12-28	Oman	30123	ssRNA(+)	FALSE	FALSE	Homo sapiens
KT203557.1	Coronaviridae_6	Infectious bronchitis virus isolate B17, complete genome	Coronaviridae	Gammacoronavirus	Avian coronavirus		2012-06-01	India	27645	ssRNA(+)	FALSE	FALSE	Gallus gallus
KT225476.2	Coronaviridae_26	Middle East respiratory syndrome coronavirus isolate MERS-CoV/THA/CU/17_06_2015, complete genome	Coronaviridae	Betacoronavirus	Middle East respiratory syndrome-related coronavirus	lung, oronasopharynx	2015-06-17	Thailand	29809	ssRNA(+)	FALSE	FALSE	Homo sapiens
KT253324.1	Coronaviridae_2	Camel alphacoronavirus Camel229E isolate Camel229E-CoV/JC50/KSA/2014, complete genome	Coronaviridae	Alphacoronavirus	Human coronavirus 229E	oronasopharynx	2014-06-01	Saudi Arabia	27395	ssRNA(+)	FALSE	FALSE	Camelus dromedarius
KT253325.1	Coronaviridae_2	Camel alphacoronavirus Camel229E isolate Camel229E-CoV/JC49/KSA/2014, complete genome	Coronaviridae	Alphacoronavirus	Human coronavirus 229E		2014-06-01	Saudi Arabia	27193	ssRNA(+)	FALSE	FALSE	Camelus dromedarius
KT253326.1	Coronaviridae_2	Camel alphacoronavirus Camel229E isolate Camel229E-CoV/JC52/KSA/2014, complete genome	Coronaviridae	Alphacoronavirus	Human coronavirus 229E		2014-06-01	Saudi Arabia	27193	ssRNA(+)	FALSE	FALSE	Camelus dromedarius
KT253327.1	Coronaviridae_2	Camel alphacoronavirus Camel229E isolate Camel229E-CoV/AC04/KSA/2014, complete genome	Coronaviridae	Alphacoronavirus	Human coronavirus 229E		2014-06-01	Saudi Arabia	27241	ssRNA(+)	FALSE	FALSE	Camelus dromedarius
KT253328.1	Coronaviridae_2	Camel alphacoronavirus Camel229E isolate Camel229E-CoV/JC50_HUH7/KSA/2014, complete genome	Coronaviridae	Alphacoronavirus	Human coronavirus 229E		2014-06-01	Saudi Arabia	27270	ssRNA(+)	FALSE	FALSE	Camelus dromedarius
KT266822.1	Coronaviridae_18	Porcine deltacoronavirus strain CH/Sichuan/S27/2012, complete genome	Coronaviridae	Deltacoronavirus	Coronavirus HKU15	feces	2012-06-01	China	25404	ssRNA(+)	FALSE	FALSE	Sus scrofa
KT266906.1	Coronaviridae_24	Human coronavirus NL63 isolate HCoV NL63/Haiti-1/2015, complete genome	Coronaviridae	Alphacoronavirus	Human coronavirus NL63	blood	2015-01-16	Haiti	27553	ssRNA(+)	FALSE	FALSE	Homo sapiens
KT326819.1	Coronaviridae_26	Middle East respiratory syndrome-related coronavirus strain MERS-CoV/KOR/KNIH/001_05_2015, complete genome	Coronaviridae	Betacoronavirus	Middle East respiratory syndrome-related coronavirus	lung, oronasopharynx	2015-05-22	South Korea	29995	ssRNA(+)	FALSE	FALSE	Homo sapiens
KT336560.1	Coronaviridae_18	Porcine deltacoronavirus isolate CHN-HN-2014, complete genome	Coronaviridae	Deltacoronavirus	Coronavirus HKU15		2014-11-24	China	25420	ssRNA(+)	FALSE	FALSE	Sus scrofa
KT368824.1	Coronaviridae_26	Middle East respiratory syndrome coronavirus isolate camel/Jeddah/F13A/2014, complete genome	Coronaviridae	Betacoronavirus	Middle East respiratory syndrome-related coronavirus		2014-05-15	Saudi Arabia	30115	ssRNA(+)	FALSE	FALSE	Camelus
KT368825.1	Coronaviridae_26	Middle East respiratory syndrome coronavirus isolate camel/Riyadh/Ry23N/2014, complete genome	Coronaviridae	Betacoronavirus	Middle East respiratory syndrome-related coronavirus		2014-07-15	Saudi Arabia	30119	ssRNA(+)	FALSE	FALSE	Camelus
KT368826.1	Coronaviridae_26	Middle East respiratory syndrome coronavirus isolate camel/Riyadh/Ry84N/2014, complete genome	Coronaviridae	Betacoronavirus	Middle East respiratory syndrome-related coronavirus		2014-07-15	Saudi Arabia	30122	ssRNA(+)	FALSE	FALSE	Camelus
KT368827.1	Coronaviridae_26	Middle East respiratory syndrome coronavirus isolate camel/Jeddah/401/2014, complete genome	Coronaviridae	Betacoronavirus	Middle East respiratory syndrome-related coronavirus		2014-09-15	Saudi Arabia	30114	ssRNA(+)	FALSE	FALSE	Camelus
KT368828.1	Coronaviridae_26	Middle East respiratory syndrome coronavirus isolate camel/Jeddah/D100/2014, complete genome	Coronaviridae	Betacoronavirus	Middle East respiratory syndrome-related coronavirus		2014-12-15	Saudi Arabia	30119	ssRNA(+)	FALSE	FALSE	Camelus
KT368829.1	Coronaviridae_26	Middle East respiratory syndrome coronavirus isolate camel/Jeddah/D33(b)/2014, complete genome	Coronaviridae	Betacoronavirus	Middle East respiratory syndrome-related coronavirus		2014-12-15	Saudi Arabia	30118	ssRNA(+)	FALSE	FALSE	Camelus
KT368830.1	Coronaviridae_26	Middle East respiratory syndrome coronavirus isolate camel/Jeddah/D34/2014, complete genome	Coronaviridae	Betacoronavirus	Middle East respiratory syndrome-related coronavirus		2014-12-15	Saudi Arabia	30119	ssRNA(+)	FALSE	FALSE	Camelus
KT368831.1	Coronaviridae_26	Middle East respiratory syndrome coronavirus isolate camel/Jeddah/D35/2014, complete genome	Coronaviridae	Betacoronavirus	Middle East respiratory syndrome-related coronavirus		2014-12-15	Saudi Arabia	30118	ssRNA(+)	FALSE	FALSE	Camelus
KT368832.1	Coronaviridae_26	Middle East respiratory syndrome coronavirus isolate camel/Jeddah/D36/2014, complete genome	Coronaviridae	Betacoronavirus	Middle East respiratory syndrome-related coronavirus		2014-12-15	Saudi Arabia	30118	ssRNA(+)	FALSE	FALSE	Camelus
KT368833.1	Coronaviridae_26	Middle East respiratory syndrome coronavirus isolate camel/Jeddah/D38(b)/2014, complete genome	Coronaviridae	Betacoronavirus	Middle East respiratory syndrome-related coronavirus		2014-12-15	Saudi Arabia	30118	ssRNA(+)	FALSE	FALSE	Camelus
KT368834.1	Coronaviridae_26	Middle East respiratory syndrome coronavirus isolate camel/Jeddah/D40/2014, complete genome	Coronaviridae	Betacoronavirus	Middle East respiratory syndrome-related coronavirus		2014-12-15	Saudi Arabia	30113	ssRNA(+)	FALSE	FALSE	Camelus
KT368835.1	Coronaviridae_26	Middle East respiratory syndrome coronavirus isolate camel/Jeddah/D42/2014, complete genome	Coronaviridae	Betacoronavirus	Middle East respiratory syndrome-related coronavirus		2014-12-15	Saudi Arabia	30119	ssRNA(+)	FALSE	FALSE	Camelus
KT368836.1	Coronaviridae_26	Middle East respiratory syndrome coronavirus isolate camel/Jeddah/D43(b)/2014, complete genome	Coronaviridae	Betacoronavirus	Middle East respiratory syndrome-related coronavirus		2014-12-15	Saudi Arabia	30119	ssRNA(+)	FALSE	FALSE	Camelus
KT368837.1	Coronaviridae_26	Middle East respiratory syndrome coronavirus isolate camel/Jeddah/D45/2014, complete genome	Coronaviridae	Betacoronavirus	Middle East respiratory syndrome-related coronavirus		2014-12-15	Saudi Arabia	30117	ssRNA(+)	FALSE	FALSE	Camelus
KT368838.1	Coronaviridae_26	Middle East respiratory syndrome coronavirus isolate camel/Jeddah/D46(b)/2014, complete genome	Coronaviridae	Betacoronavirus	Middle East respiratory syndrome-related coronavirus		2014-12-15	Saudi Arabia	30118	ssRNA(+)	FALSE	FALSE	Camelus
KT368839.1	Coronaviridae_26	Middle East respiratory syndrome coronavirus isolate camel/Jeddah/D47/2014, complete genome	Coronaviridae	Betacoronavirus	Middle East respiratory syndrome-related coronavirus		2014-12-15	Saudi Arabia	30117	ssRNA(+)	FALSE	FALSE	Camelus
KT368840.1	Coronaviridae_26	Middle East respiratory syndrome coronavirus isolate camel/Jeddah/D48/2014, complete genome	Coronaviridae	Betacoronavirus	Middle East respiratory syndrome-related coronavirus		2014-12-15	Saudi Arabia	30116	ssRNA(+)	FALSE	FALSE	Camelus
KT368841.1	Coronaviridae_26	Middle East respiratory syndrome coronavirus isolate camel/Jeddah/D49/2014, complete genome	Coronaviridae	Betacoronavirus	Middle East respiratory syndrome-related coronavirus		2014-12-15	Saudi Arabia	30110	ssRNA(+)	FALSE	FALSE	Camelus
KT368842.1	Coronaviridae_26	Middle East respiratory syndrome coronavirus isolate camel/Jeddah/D50(b)/2014, complete genome	Coronaviridae	Betacoronavirus	Middle East respiratory syndrome-related coronavirus		2014-12-15	Saudi Arabia	30116	ssRNA(+)	FALSE	FALSE	Camelus
KT368843.1	Coronaviridae_26	Middle East respiratory syndrome coronavirus isolate camel/Jeddah/D88/2014, complete genome	Coronaviridae	Betacoronavirus	Middle East respiratory syndrome-related coronavirus		2014-12-15	Saudi Arabia	30118	ssRNA(+)	FALSE	FALSE	Camelus
KT368844.1	Coronaviridae_26	Middle East respiratory syndrome coronavirus isolate camel/Jeddah/D90/2014, complete genome	Coronaviridae	Betacoronavirus	Middle East respiratory syndrome-related coronavirus		2014-12-15	Saudi Arabia	30109	ssRNA(+)	FALSE	FALSE	Camelus
KT368845.1	Coronaviridae_26	Middle East respiratory syndrome coronavirus isolate camel/Jeddah/D92/2014, complete genome	Coronaviridae	Betacoronavirus	Middle East respiratory syndrome-related coronavirus		2014-12-15	Saudi Arabia	30116	ssRNA(+)	FALSE	FALSE	Camelus
KT368846.1	Coronaviridae_26	Middle East respiratory syndrome coronavirus isolate camel/Jeddah/N51/2014, complete genome	Coronaviridae	Betacoronavirus	Middle East respiratory syndrome-related coronavirus		2014-11-15	Saudi Arabia	30115	ssRNA(+)	FALSE	FALSE	Camelus
KT368847.1	Coronaviridae_26	Middle East respiratory syndrome coronavirus isolate camel/Jeddah/N62(b)/2014, complete genome	Coronaviridae	Betacoronavirus	Middle East respiratory syndrome-related coronavirus		2014-11-15	Saudi Arabia	30110	ssRNA(+)	FALSE	FALSE	Camelus
KT368848.1	Coronaviridae_26	Middle East respiratory syndrome coronavirus isolate camel/Jeddah/N68(b)/2014, complete genome	Coronaviridae	Betacoronavirus	Middle East respiratory syndrome-related coronavirus		2014-11-15	Saudi Arabia	30118	ssRNA(+)	FALSE	FALSE	Camelus
KT368849.1	Coronaviridae_26	Middle East respiratory syndrome coronavirus isolate camel/Jeddah/O23(b)/2014, complete genome	Coronaviridae	Betacoronavirus	Middle East respiratory syndrome-related coronavirus		2014-10-15	Saudi Arabia	30117	ssRNA(+)	FALSE	FALSE	Camelus
KT368850.1	Coronaviridae_26	Middle East respiratory syndrome coronavirus isolate camel/Jeddah/O24/2014, complete genome	Coronaviridae	Betacoronavirus	Middle East respiratory syndrome-related coronavirus		2014-10-15	Saudi Arabia	30118	ssRNA(+)	FALSE	FALSE	Camelus
KT368851.1	Coronaviridae_26	Middle East respiratory syndrome coronavirus isolate camel/Jeddah/O30/2014, complete genome	Coronaviridae	Betacoronavirus	Middle East respiratory syndrome-related coronavirus		2014-10-15	Saudi Arabia	30119	ssRNA(+)	FALSE	FALSE	Camelus
KT368852.1	Coronaviridae_26	Middle East respiratory syndrome coronavirus isolate camel/Jeddah/O47(b)/2014, complete genome	Coronaviridae	Betacoronavirus	Middle East respiratory syndrome-related coronavirus		2014-10-15	Saudi Arabia	30117	ssRNA(+)	FALSE	FALSE	Camelus
KT368853.1	Coronaviridae_26	Middle East respiratory syndrome coronavirus isolate camel/Jeddah/S100/2014, complete genome	Coronaviridae	Betacoronavirus	Middle East respiratory syndrome-related coronavirus		2014-09-15	Saudi Arabia	30108	ssRNA(+)	FALSE	FALSE	Camelus
KT368854.1	Coronaviridae_26	Middle East respiratory syndrome coronavirus isolate camel/Jeddah/S73/2014, complete genome	Coronaviridae	Betacoronavirus	Middle East respiratory syndrome-related coronavirus		2014-09-15	Saudi Arabia	30118	ssRNA(+)	FALSE	FALSE	Camelus
KT368855.1	Coronaviridae_26	Middle East respiratory syndrome coronavirus isolate camel/Jeddah/S93/2014, complete genome	Coronaviridae	Betacoronavirus	Middle East respiratory syndrome-related coronavirus		2014-09-15	Saudi Arabia	30115	ssRNA(+)	FALSE	FALSE	Camelus
KT368856.1	Coronaviridae_26	Middle East respiratory syndrome coronavirus isolate camel/Jeddah/S94/2014, complete genome	Coronaviridae	Betacoronavirus	Middle East respiratory syndrome-related coronavirus		2014-09-15	Saudi Arabia	30117	ssRNA(+)	FALSE	FALSE	Camelus
KT368857.1	Coronaviridae_26	Middle East respiratory syndrome coronavirus isolate camel/Jeddah/S99/2014, complete genome	Coronaviridae	Betacoronavirus	Middle East respiratory syndrome-related coronavirus		2014-09-15	Saudi Arabia	30119	ssRNA(+)	FALSE	FALSE	Camelus
KT368858.1	Coronaviridae_26	Middle East respiratory syndrome coronavirus isolate camel/Jeddah/Jd1(b)/2015, complete genome	Coronaviridae	Betacoronavirus	Middle East respiratory syndrome-related coronavirus		2015-01-15	Saudi Arabia	30113	ssRNA(+)	FALSE	FALSE	Camelus
KT368859.1	Coronaviridae_26	Middle East respiratory syndrome coronavirus isolate camel/Jeddah/Jd4/2015, complete genome	Coronaviridae	Betacoronavirus	Middle East respiratory syndrome-related coronavirus		2015-01-15	Saudi Arabia	30116	ssRNA(+)	FALSE	FALSE	Camelus
KT368860.1	Coronaviridae_26	Middle East respiratory syndrome coronavirus isolate camel/Jeddah/Jd6(b)/2015, complete genome	Coronaviridae	Betacoronavirus	Middle East respiratory syndrome-related coronavirus		2015-01-15	Saudi Arabia	30122	ssRNA(+)	FALSE	FALSE	Camelus
KT368861.1	Coronaviridae_26	Middle East respiratory syndrome coronavirus isolate camel/Jeddah/Jd7/2015, complete genome	Coronaviridae	Betacoronavirus	Middle East respiratory syndrome-related coronavirus		2015-01-15	Saudi Arabia	30118	ssRNA(+)	FALSE	FALSE	Camelus
KT368862.1	Coronaviridae_26	Middle East respiratory syndrome coronavirus isolate camel/Jeddah/Jd85/2015, complete genome	Coronaviridae	Betacoronavirus	Middle East respiratory syndrome-related coronavirus		2015-01-15	Saudi Arabia	30120	ssRNA(+)	FALSE	FALSE	Camelus
KT368863.1	Coronaviridae_26	Middle East respiratory syndrome coronavirus isolate camel/Jeddah/Jd86/2015, complete genome	Coronaviridae	Betacoronavirus	Middle East respiratory syndrome-related coronavirus		2015-01-15	Saudi Arabia	30120	ssRNA(+)	FALSE	FALSE	Camelus
KT368864.1	Coronaviridae_26	Middle East respiratory syndrome coronavirus isolate camel/Jeddah/Jd87/2015, complete genome	Coronaviridae	Betacoronavirus	Middle East respiratory syndrome-related coronavirus		2015-01-15	Saudi Arabia	30118	ssRNA(+)	FALSE	FALSE	Camelus
KT368865.1	Coronaviridae_26	Middle East respiratory syndrome coronavirus isolate camel/Jeddah/Jd90/2015, complete genome	Coronaviridae	Betacoronavirus	Middle East respiratory syndrome-related coronavirus		2015-01-15	Saudi Arabia	30109	ssRNA(+)	FALSE	FALSE	Camelus
KT368866.1	Coronaviridae_26	Middle East respiratory syndrome coronavirus isolate camel/Jeddah/Jd175/2015, complete genome	Coronaviridae	Betacoronavirus	Middle East respiratory syndrome-related coronavirus		2015-02-15	Saudi Arabia	30114	ssRNA(+)	FALSE	FALSE	Camelus
KT368867.1	Coronaviridae_26	Middle East respiratory syndrome coronavirus isolate camel/Jeddah/Jd199/2015, complete genome	Coronaviridae	Betacoronavirus	Middle East respiratory syndrome-related coronavirus		2015-02-15	Saudi Arabia	30116	ssRNA(+)	FALSE	FALSE	Camelus
KT368868.1	Coronaviridae_26	Middle East respiratory syndrome coronavirus isolate camel/Riyadh/Ry136/2015, complete genome	Coronaviridae	Betacoronavirus	Middle East respiratory syndrome-related coronavirus		2015-03-15	Saudi Arabia	30122	ssRNA(+)	FALSE	FALSE	Camelus
KT368869.1	Coronaviridae_26	Middle East respiratory syndrome coronavirus isolate camel/Riyadh/Ry137/2015, complete genome	Coronaviridae	Betacoronavirus	Middle East respiratory syndrome-related coronavirus		2015-03-15	Saudi Arabia	30111	ssRNA(+)	FALSE	FALSE	Camelus
KT368870.1	Coronaviridae_26	Middle East respiratory syndrome coronavirus isolate camel/Riyadh/Ry159(b)/2015, complete genome	Coronaviridae	Betacoronavirus	Middle East respiratory syndrome-related coronavirus		2015-03-15	Saudi Arabia	30110	ssRNA(+)	FALSE	FALSE	Camelus
KT368871.1	Coronaviridae_26	Middle East respiratory syndrome coronavirus isolate camel/Riyadh/Ry162/2015, complete genome	Coronaviridae	Betacoronavirus	Middle East respiratory syndrome-related coronavirus		2015-03-15	Saudi Arabia	30118	ssRNA(+)	FALSE	FALSE	Camelus
KT368872.1	Coronaviridae_26	Middle East respiratory syndrome coronavirus isolate camel/Riyadh/Ry173/2015, complete genome	Coronaviridae	Betacoronavirus	Middle East respiratory syndrome-related coronavirus		2015-03-15	Saudi Arabia	30122	ssRNA(+)	FALSE	FALSE	Camelus
KT368873.1	Coronaviridae_26	Middle East respiratory syndrome coronavirus isolate camel/Riyadh/Ry177/2015, complete genome	Coronaviridae	Betacoronavirus	Middle East respiratory syndrome-related coronavirus		2015-03-15	Saudi Arabia	30118	ssRNA(+)	FALSE	FALSE	Camelus
KT368874.1	Coronaviridae_26	Middle East respiratory syndrome coronavirus isolate camel/Riyadh/Ry178/2015, complete genome	Coronaviridae	Betacoronavirus	Middle East respiratory syndrome-related coronavirus		2015-03-15	Saudi Arabia	30122	ssRNA(+)	FALSE	FALSE	Camelus
KT368875.1	Coronaviridae_26	Middle East respiratory syndrome coronavirus isolate camel/Riyadh/Ry179/2015, complete genome	Coronaviridae	Betacoronavirus	Middle East respiratory syndrome-related coronavirus		2015-03-15	Saudi Arabia	30113	ssRNA(+)	FALSE	FALSE	Camelus
KT368876.1	Coronaviridae_26	Middle East respiratory syndrome coronavirus isolate camel/Riyadh/Ry63/2015, complete genome	Coronaviridae	Betacoronavirus	Middle East respiratory syndrome-related coronavirus		2015-03-15	Saudi Arabia	30121	ssRNA(+)	FALSE	FALSE	Camelus
KT368877.1	Coronaviridae_26	Middle East respiratory syndrome coronavirus isolate camel/Riyadh/Ry64/2015, complete genome	Coronaviridae	Betacoronavirus	Middle East respiratory syndrome-related coronavirus		2015-03-15	Saudi Arabia	30118	ssRNA(+)	FALSE	FALSE	Camelus
KT368878.1	Coronaviridae_26	Middle East respiratory syndrome coronavirus isolate camel/Riyadh/Ry79/2015, complete genome	Coronaviridae	Betacoronavirus	Middle East respiratory syndrome-related coronavirus		2015-03-15	Saudi Arabia	30117	ssRNA(+)	FALSE	FALSE	Camelus
KT368879.1	Coronaviridae_26	Middle East respiratory syndrome coronavirus isolate camel/Riyadh/Ry86/2015, complete genome	Coronaviridae	Betacoronavirus	Middle East respiratory syndrome-related coronavirus		2015-03-15	Saudi Arabia	30107	ssRNA(+)	FALSE	FALSE	Camelus
KT368880.1	Coronaviridae_26	Middle East respiratory syndrome coronavirus isolate camel/Taif/T3/2015, complete genome	Coronaviridae	Betacoronavirus	Middle East respiratory syndrome-related coronavirus		2015-04-15	Saudi Arabia	30122	ssRNA(+)	FALSE	FALSE	Camelus
KT368881.1	Coronaviridae_26	Middle East respiratory syndrome coronavirus isolate camel/Taif/T7/2015, complete genome	Coronaviridae	Betacoronavirus	Middle East respiratory syndrome-related coronavirus		2015-04-15	Saudi Arabia	30113	ssRNA(+)	FALSE	FALSE	Camelus
KT368882.1	Coronaviridae_26	Middle East respiratory syndrome coronavirus isolate camel/Taif/T16/2015, complete genome	Coronaviridae	Betacoronavirus	Middle East respiratory syndrome-related coronavirus		2015-04-15	Saudi Arabia	30120	ssRNA(+)	FALSE	FALSE	Camelus
KT368883.1	Coronaviridae_26	Middle East respiratory syndrome coronavirus isolate camel/Taif/T22/2015, complete genome	Coronaviridae	Betacoronavirus	Middle East respiratory syndrome-related coronavirus		2015-04-15	Saudi Arabia	30122	ssRNA(+)	FALSE	FALSE	Camelus
KT368884.1	Coronaviridae_26	Middle East respiratory syndrome coronavirus isolate camel/Taif/T68/2015, complete genome	Coronaviridae	Betacoronavirus	Middle East respiratory syndrome-related coronavirus		2015-04-15	Saudi Arabia	30114	ssRNA(+)	FALSE	FALSE	Camelus
KT368885.1	Coronaviridae_26	Middle East respiratory syndrome coronavirus isolate camel/Taif/T89/2015, complete genome	Coronaviridae	Betacoronavirus	Middle East respiratory syndrome-related coronavirus		2015-04-15	Saudi Arabia	30118	ssRNA(+)	FALSE	FALSE	Camelus
KT368886.1	Coronaviridae_26	Middle East respiratory syndrome coronavirus isolate camel/Taif/T91(b)/2015, complete genome	Coronaviridae	Betacoronavirus	Middle East respiratory syndrome-related coronavirus		2015-04-15	Saudi Arabia	30118	ssRNA(+)	FALSE	FALSE	Camelus
KT368887.1	Coronaviridae_26	Middle East respiratory syndrome coronavirus isolate camel/Taif/T92/2015, complete genome	Coronaviridae	Betacoronavirus	Middle East respiratory syndrome-related coronavirus		2015-04-15	Saudi Arabia	30116	ssRNA(+)	FALSE	FALSE	Camelus
KT368888.1	Coronaviridae_26	Middle East respiratory syndrome coronavirus isolate camel/Taif/T98/2015, complete genome	Coronaviridae	Betacoronavirus	Middle East respiratory syndrome-related coronavirus		2015-04-15	Saudi Arabia	30116	ssRNA(+)	FALSE	FALSE	Camelus
KT368889.1	Coronaviridae_26	Middle East respiratory syndrome coronavirus isolate camel/Taif/T150/2015, complete genome	Coronaviridae	Betacoronavirus	Middle East respiratory syndrome-related coronavirus		2015-03-15	Saudi Arabia	30110	ssRNA(+)	FALSE	FALSE	Camelus
KT368890.1	Coronaviridae_26	Middle East respiratory syndrome coronavirus isolate camel/Taif/T157(b)/2015, complete genome	Coronaviridae	Betacoronavirus	Middle East respiratory syndrome-related coronavirus		2015-03-15	Saudi Arabia	30120	ssRNA(+)	FALSE	FALSE	Camelus
KT368891.1	Coronaviridae_4	Camel coronavirus HKU23 isolate camel/Riyadh/Ry123/2015, complete genome	Coronaviridae	Betacoronavirus	Camel coronavirus HKU23		2015-03-15	Saudi Arabia	31041	ssRNA(+)	FALSE	FALSE	Camelus
KT368892.1	Coronaviridae_2	Camel alphacoronavirus isolate camel/Jeddah/Jd29/2014, complete genome	Coronaviridae	Alphacoronavirus	Human coronavirus 229E		2014-06-15	Saudi Arabia	27391	ssRNA(+)	FALSE	FALSE	Camelus
KT368893.1	Coronaviridae_2	Camel alphacoronavirus isolate camel/Jeddah/Jd55/2014, complete genome	Coronaviridae	Alphacoronavirus	Human coronavirus 229E		2014-06-15	Saudi Arabia	27386	ssRNA(+)	FALSE	FALSE	Camelus
KT368894.1	Coronaviridae_2	Camel alphacoronavirus isolate camel/Jeddah/Jd63/2014, complete genome	Coronaviridae	Alphacoronavirus	Human coronavirus 229E		2014-06-15	Saudi Arabia	27397	ssRNA(+)	FALSE	FALSE	Camelus
KT368895.1	Coronaviridae_2	Camel alphacoronavirus isolate camel/Jeddah/O23(a)/2014, complete genome	Coronaviridae	Alphacoronavirus	Human coronavirus 229E		2014-10-15	Saudi Arabia	27396	ssRNA(+)	FALSE	FALSE	Camelus
KT368896.1	Coronaviridae_2	Camel alphacoronavirus isolate camel/Jeddah/O47(a)/2014, complete genome	Coronaviridae	Alphacoronavirus	Human coronavirus 229E		2014-10-15	Saudi Arabia	27389	ssRNA(+)	FALSE	FALSE	Camelus
KT368897.1	Coronaviridae_2	Camel alphacoronavirus isolate camel/Jeddah/O100/2014, complete genome	Coronaviridae	Alphacoronavirus	Human coronavirus 229E		2014-10-15	Saudi Arabia	27395	ssRNA(+)	FALSE	FALSE	Camelus
KT368898.1	Coronaviridae_2	Camel alphacoronavirus isolate camel/Jeddah/N38/2014, complete genome	Coronaviridae	Alphacoronavirus	Human coronavirus 229E		2014-11-15	Saudi Arabia	27395	ssRNA(+)	FALSE	FALSE	Camelus
KT368899.1	Coronaviridae_2	Camel alphacoronavirus isolate camel/Jeddah/N60/2014, complete genome	Coronaviridae	Alphacoronavirus	Human coronavirus 229E		2014-11-15	Saudi Arabia	27390	ssRNA(+)	FALSE	FALSE	Camelus
KT368900.1	Coronaviridae_2	Camel alphacoronavirus isolate camel/Jeddah/N62(a)/2014, complete genome	Coronaviridae	Alphacoronavirus	Human coronavirus 229E		2014-11-15	Saudi Arabia	27390	ssRNA(+)	FALSE	FALSE	Camelus
KT368901.1	Coronaviridae_2	Camel alphacoronavirus isolate camel/Jeddah/N68(a)/2014, complete genome	Coronaviridae	Alphacoronavirus	Human coronavirus 229E		2014-11-15	Saudi Arabia	27396	ssRNA(+)	FALSE	FALSE	Camelus
KT368902.1	Coronaviridae_2	Camel alphacoronavirus isolate camel/Jeddah/D33(a)/2014, complete genome	Coronaviridae	Alphacoronavirus	Human coronavirus 229E		2014-12-15	Saudi Arabia	27396	ssRNA(+)	FALSE	FALSE	Camelus
KT368903.1	Coronaviridae_2	Camel alphacoronavirus isolate camel/Jeddah/D38(a)/2014, complete genome	Coronaviridae	Alphacoronavirus	Human coronavirus 229E		2014-12-15	Saudi Arabia	27384	ssRNA(+)	FALSE	FALSE	Camelus
KT368904.1	Coronaviridae_2	Camel alphacoronavirus isolate camel/Jeddah/D43(a)/2014, complete genome	Coronaviridae	Alphacoronavirus	Human coronavirus 229E		2014-12-15	Saudi Arabia	27395	ssRNA(+)	FALSE	FALSE	Camelus
KT368905.1	Coronaviridae_2	Camel alphacoronavirus isolate camel/Jeddah/D46(a)/2014, complete genome	Coronaviridae	Alphacoronavirus	Human coronavirus 229E		2014-12-15	Saudi Arabia	27397	ssRNA(+)	FALSE	FALSE	Camelus
KT368906.1	Coronaviridae_2	Camel alphacoronavirus isolate camel/Jeddah/D50(a)/2014, complete genome	Coronaviridae	Alphacoronavirus	Human coronavirus 229E		2014-12-15	Saudi Arabia	27395	ssRNA(+)	FALSE	FALSE	Camelus
KT368907.1	Coronaviridae_2	Camel alphacoronavirus isolate camel/Riyadh/Ry141/2015, complete genome	Coronaviridae	Alphacoronavirus	Human coronavirus 229E		2015-03-15	Saudi Arabia	27395	ssRNA(+)	FALSE	FALSE	Camelus
KT368908.1	Coronaviridae_2	Camel alphacoronavirus isolate camel/Riyadh/Ry159(a)/2015, complete genome	Coronaviridae	Alphacoronavirus	Human coronavirus 229E		2015-03-15	Saudi Arabia	27395	ssRNA(+)	FALSE	FALSE	Camelus
KT368909.1	Coronaviridae_2	Camel alphacoronavirus isolate camel/Jeddah/Jd1(a)/2015, complete genome	Coronaviridae	Alphacoronavirus	Human coronavirus 229E		2015-01-15	Saudi Arabia	27386	ssRNA(+)	FALSE	FALSE	Camelus
KT368910.1	Coronaviridae_2	Camel alphacoronavirus isolate camel/Jeddah/Jd6(a)/2015, complete genome	Coronaviridae	Alphacoronavirus	Human coronavirus 229E		2015-01-15	Saudi Arabia	27387	ssRNA(+)	FALSE	FALSE	Camelus
KT368911.1	Coronaviridae_2	Camel alphacoronavirus isolate camel/Jeddah/Jd8/2015, complete genome	Coronaviridae	Alphacoronavirus	Human coronavirus 229E		2015-01-15	Saudi Arabia	27393	ssRNA(+)	FALSE	FALSE	Camelus
KT368912.1	Coronaviridae_2	Camel alphacoronavirus isolate camel/Jeddah/Jd28/2015, complete genome	Coronaviridae	Alphacoronavirus	Human coronavirus 229E		2015-01-15	Saudi Arabia	27395	ssRNA(+)	FALSE	FALSE	Camelus
KT368913.1	Coronaviridae_2	Camel alphacoronavirus isolate camel/Taif/T91(a)/2015, complete genome	Coronaviridae	Alphacoronavirus	Human coronavirus 229E		2015-04-15	Saudi Arabia	27388	ssRNA(+)	FALSE	FALSE	Camelus
KT368914.1	Coronaviridae_2	Camel alphacoronavirus isolate camel/Taif/T96/2015, complete genome	Coronaviridae	Alphacoronavirus	Human coronavirus 229E		2015-04-15	Saudi Arabia	27392	ssRNA(+)	FALSE	FALSE	Camelus
KT368915.1	Coronaviridae_2	Camel alphacoronavirus isolate camel/Taif/T157(a)/2015, complete genome	Coronaviridae	Alphacoronavirus	Human coronavirus 229E		2015-03-15	Saudi Arabia	27392	ssRNA(+)	FALSE	FALSE	Camelus
KT368916.1	Coronaviridae_2	Camel alphacoronavirus isolate camel/Taif/T193/2015, complete genome	Coronaviridae	Alphacoronavirus	Human coronavirus 229E		2015-03-15	Saudi Arabia	27390	ssRNA(+)	FALSE	FALSE	Camelus
KT374050.1	Coronaviridae_26	Middle East respiratory syndrome coronavirus isolate KOREA/Seoul/163-2-2015, complete genome	Coronaviridae	Betacoronavirus	Middle East respiratory syndrome-related coronavirus	lung, oronasopharynx	2015-06-29	South Korea	29831	ssRNA(+)	FALSE	FALSE	Homo sapiens
KT374051.1	Coronaviridae_26	Middle East respiratory syndrome coronavirus isolate KOREA/Seoul/163-1-2015, complete genome	Coronaviridae	Betacoronavirus	Middle East respiratory syndrome-related coronavirus	lung, oronasopharynx	2015-06-19	South Korea	29831	ssRNA(+)	FALSE	FALSE	Homo sapiens
KT374052.1	Coronaviridae_26	Middle East respiratory syndrome coronavirus isolate KOREA/Seoul/014-1-2015, complete genome	Coronaviridae	Betacoronavirus	Middle East respiratory syndrome-related coronavirus	lung	2015-05-31	South Korea	29831	ssRNA(+)	FALSE	FALSE	Homo sapiens
KT374053.1	Coronaviridae_26	Middle East respiratory syndrome coronavirus isolate KOREA/Seoul/014-2-2015, complete genome	Coronaviridae	Betacoronavirus	Middle East respiratory syndrome-related coronavirus	lung, oronasopharynx	2015-06-13	South Korea	29831	ssRNA(+)	FALSE	FALSE	Homo sapiens
KT374054.1	Coronaviridae_26	Middle East respiratory syndrome coronavirus isolate KOREA/Seoul/035-1-2015, complete genome	Coronaviridae	Betacoronavirus	Middle East respiratory syndrome-related coronavirus	lung, oronasopharynx	2015-06-03	South Korea	29831	ssRNA(+)	FALSE	FALSE	Homo sapiens
KT374055.1	Coronaviridae_26	Middle East respiratory syndrome coronavirus isolate KOREA/Seoul/035-2-2015, complete genome	Coronaviridae	Betacoronavirus	Middle East respiratory syndrome-related coronavirus	lung	2015-06-18	South Korea	29831	ssRNA(+)	FALSE	FALSE	Homo sapiens
KT374056.1	Coronaviridae_26	Middle East respiratory syndrome coronavirus isolate KOREA/Seoul/168-1-2015, complete genome	Coronaviridae	Betacoronavirus	Middle East respiratory syndrome-related coronavirus	lung, oronasopharynx	2015-06-21	South Korea	29831	ssRNA(+)	FALSE	FALSE	Homo sapiens
KT374057.1	Coronaviridae_26	Middle East respiratory syndrome coronavirus isolate KOREA/Seoul/168-2-2015, complete genome	Coronaviridae	Betacoronavirus	Middle East respiratory syndrome-related coronavirus	lung, oronasopharynx	2015-06-24	South Korea	29831	ssRNA(+)	FALSE	FALSE	Homo sapiens
KT381613.1	Coronaviridae_18	Porcine coronavirus HKU15 strain OH11846, complete genome	Coronaviridae	Deltacoronavirus	Coronavirus HKU15		2014-05-07	USA	25422	ssRNA(+)	FALSE	FALSE	Sus scrofa
KT381875.1	Coronaviridae_24	Human coronavirus NL63 isolate NL63/UF-1/2015, complete genome	Coronaviridae	Alphacoronavirus	Human coronavirus NL63	oronasopharynx	2015-06-01	USA	27553	ssRNA(+)	FALSE	FALSE	Homo sapiens
KT444582.1	Coronaviridae_3	SARS-like coronavirus WIV16, complete genome	Coronaviridae	Betacoronavirus	SARS-like coronavirus WIV16	feces	2013-07-21	China	30290	ssRNA(+)	FALSE	FALSE	Rhinolophus sinicus
KT591944.1	Coronaviridae_17	Porcine epidemic diarrhea virus strain USA/2014/IL/20697 P7, complete genome	Coronaviridae	Alphacoronavirus	Porcine epidemic diarrhea virus		2013-12-31	USA	28025	ssRNA(+)	FALSE	FALSE	Sus scrofa
KT696544.1	Coronaviridae_5	Transmissible gastroenteritis virus strain JS2012, complete genome	Coronaviridae	Alphacoronavirus	Alphacoronavirus 1		2012-06-01	China	28542	ssRNA(+)	FALSE	FALSE	Sus scrofa
KT736031.1	Coronaviridae_6	Infectious bronchitis virus isolate ck/CH/LDL/150434-I, complete genome	Coronaviridae	Gammacoronavirus	Avian coronavirus		2015-04-15	China	27641	ssRNA(+)	FALSE	FALSE	Gallus gallus
KT736032.1	Coronaviridae_6	Infectious bronchitis virus isolate ckCHLDL150434-II, complete genome	Coronaviridae	Gammacoronavirus	Avian coronavirus		2015-04-15	China	27615	ssRNA(+)	FALSE	FALSE	Gallus gallus
KT779555.1	Coronaviridae_13	Human coronavirus HKU1 isolate BJ01-p3, complete genome	Coronaviridae	Betacoronavirus	Human coronavirus HKU1	oronasopharynx	2009-04-23	China	29887	ssRNA(+)	FALSE	FALSE	Homo sapiens
KT806044.1	Coronaviridae_26	Middle East respiratory syndrome coronavirus isolate Hu/Jeddah-KSA-C20843/2015, complete genome	Coronaviridae	Betacoronavirus	Middle East respiratory syndrome-related coronavirus	lung, oronasopharynx	2015-02-09	Saudi Arabia	30096	ssRNA(+)	FALSE	FALSE	Homo sapiens
KT806045.1	Coronaviridae_26	Middle East respiratory syndrome coronavirus isolate Hu/Jeddah-KSA-C21271/2015, complete genome	Coronaviridae	Betacoronavirus	Middle East respiratory syndrome-related coronavirus	lung, oronasopharynx	2015-02-22	Saudi Arabia	30096	ssRNA(+)	FALSE	FALSE	Homo sapiens
KT806047.1	Coronaviridae_26	Middle East respiratory syndrome coronavirus isolate Hu/Hufuf-KSA-9158/2015, complete genome	Coronaviridae	Betacoronavirus	Middle East respiratory syndrome-related coronavirus	lung, oronasopharynx	2015-03-27	Saudi Arabia	30087	ssRNA(+)	FALSE	FALSE	Homo sapiens
KT806049.1	Coronaviridae_26	Middle East respiratory syndrome coronavirus isolate Hu/Riyadh-KSA-3181/2015, complete genome	Coronaviridae	Betacoronavirus	Middle East respiratory syndrome-related coronavirus	lung, oronasopharynx	2015-02-15	Saudi Arabia	30096	ssRNA(+)	FALSE	FALSE	Homo sapiens
KT806051.1	Coronaviridae_26	Middle East respiratory syndrome coronavirus isolate Hu/Riyadh-KSA-2716/2015, complete genome	Coronaviridae	Betacoronavirus	Middle East respiratory syndrome-related coronavirus	lung, oronasopharynx	2015-02-05	Saudi Arabia	30096	ssRNA(+)	FALSE	FALSE	Homo sapiens
KT806052.1	Coronaviridae_26	Middle East respiratory syndrome coronavirus isolate Hu/Kharj-KSA-2599/2015, complete genome	Coronaviridae	Betacoronavirus	Middle East respiratory syndrome-related coronavirus	lung, oronasopharynx	2015-02-02	Saudi Arabia	30096	ssRNA(+)	FALSE	FALSE	Homo sapiens
KT806053.1	Coronaviridae_26	Middle East respiratory syndrome coronavirus isolate Hu/Kharj-KSA-2598/2015, complete genome	Coronaviridae	Betacoronavirus	Middle East respiratory syndrome-related coronavirus		2015-02-02	Saudi Arabia	30096	ssRNA(+)	FALSE	FALSE	Homo sapiens
KT806054.1	Coronaviridae_26	Middle East respiratory syndrome coronavirus isolate Hu/Najran-KSA-C20915/2015, complete genome	Coronaviridae	Betacoronavirus	Middle East respiratory syndrome-related coronavirus	lung, oronasopharynx	2015-02-13	Saudi Arabia	29695	ssRNA(+)	FALSE	FALSE	Homo sapiens
KT806055.1	Coronaviridae_26	Middle East respiratory syndrome coronavirus isolate Hu/Jeddah-KSA-C20860/2015, complete genome	Coronaviridae	Betacoronavirus	Middle East respiratory syndrome-related coronavirus	lung, oronasopharynx	2015-02-10	Saudi Arabia	30096	ssRNA(+)	FALSE	FALSE	Homo sapiens
KT852992.1	Coronaviridae_6	Infectious bronchitis virus isolate tl/CH/LDT3/03, complete genome	Coronaviridae	Gammacoronavirus	Avian coronavirus		2015-06-01	China	27699	ssRNA(+)	FALSE	FALSE	Gallus gallus
KT860508.1	Coronaviridae_17	Porcine epidemic diarrhea virus strain USA/IL20697/2014 Passage 5, complete genome	Coronaviridae	Alphacoronavirus	Porcine epidemic diarrhea virus		2013-12-31	USA	28029	ssRNA(+)	FALSE	FALSE	Sus scrofa
KT861627.1	Coronaviridae_26	Middle East respiratory syndrome-related coronavirus isolate Hu/Jordan-20140010168/2014, complete genome	Coronaviridae	Betacoronavirus	Middle East respiratory syndrome-related coronavirus	lung, oronasopharynx	2014-01-22	Jordan	30089	ssRNA(+)	FALSE	FALSE	Homo sapiens
KT877350.1	Coronaviridae_26	Middle East respiratory syndrome coronavirus isolate KSA_1725, complete genome	Coronaviridae	Betacoronavirus	Middle East respiratory syndrome-related coronavirus	oronasopharynx	2014-09-15	Saudi Arabia	30121	ssRNA(+)	FALSE	FALSE	Camelus dromedarius
KT877351.1	Coronaviridae_26	Middle East respiratory syndrome coronavirus isolate KSA_1724, complete genome	Coronaviridae	Betacoronavirus	Middle East respiratory syndrome-related coronavirus	oronasopharynx	2014-09-15	Saudi Arabia	30010	ssRNA(+)	FALSE	FALSE	Camelus dromedarius
KT886454.1	Coronaviridae_6	Infectious bronchitis virus isolate gammaCoV/Ck/Poland/74/2009, complete genome	Coronaviridae	Gammacoronavirus	Avian coronavirus		2009-06-01	Poland	27418	ssRNA(+)	FALSE	FALSE	Gallus gallus
KT941120.1	Coronaviridae_17	Porcine epidemic diarrhea virus strain HUA-14PED96, complete genome	Coronaviridae	Alphacoronavirus	Porcine epidemic diarrhea virus	feces	2014-10-15	Viet Nam	27966	ssRNA(+)	FALSE	FALSE	Sus scrofa
KT946798.1	Coronaviridae_6	Infectious bronchitis virus strain CK/CH/GD/GZ14, complete genome	Coronaviridae	Gammacoronavirus	Avian coronavirus		2014-01-01	China	27690	ssRNA(+)	FALSE	FALSE	Gallus gallus
KU051641.1	Coronaviridae_18	Porcine deltacoronavirus strain PDCoV/Swine/Thailand/S5011/2015, complete genome	Coronaviridae	Deltacoronavirus	Coronavirus HKU15	abdominal cavity	2015-06-10	Thailand	25405	ssRNA(+)	FALSE	FALSE	Sus scrofa
KU051649.1	Coronaviridae_18	Porcine deltacoronavirus strain PDCoV/Swine/Thailand/S5015L/2015, complete genome	Coronaviridae	Deltacoronavirus	Coronavirus HKU15	lymph	2015-06-30	Thailand	25405	ssRNA(+)	FALSE	FALSE	Sus scrofa
KU131570.1	Coronaviridae_4	Human coronavirus OC43 strain HCoV-OC43/UK/London/2011, complete genome	Coronaviridae	Betacoronavirus	Betacoronavirus 1	brain	2011-08-20	United Kingdom	30746	ssRNA(+)	FALSE	FALSE	Homo sapiens
KU182964.1	Coronaviridae_3	Sarbecovirus sp. isolate JTMC15, complete genome	Coronaviridae	Betacoronavirus	Sarbecovirus sp.	abdominal cavity	2013-08-15	China	28761	ssRNA(+)	FALSE	FALSE	Rhinolophus ferrumequinum
KU182965.1	Coronaviridae_38	Bat coronavirus isolate JPDB144, complete genome	Coronaviridae		Bat coronavirus	abdominal cavity	2012-12-15	China	30321	ssRNA(+)	FALSE	FALSE	Myotis daubentonii
KU215419.1	Coronaviridae_10	Feline coronavirus isolate inoculum, complete genome	Coronaviridae	Alphacoronavirus	Alphacoronavirus 1		2013-06-01	Belgium	29262	ssRNA(+)	FALSE	FALSE	Felis catus
KU215420.1	Coronaviridae_10	Feline coronavirus isolate Cat1_day7, complete genome	Coronaviridae	Alphacoronavirus	Alphacoronavirus 1		2013-06-01	Belgium	29262	ssRNA(+)	FALSE	FALSE	Felis catus
KU215421.1	Coronaviridae_10	Feline coronavirus isolate Cat2_day21_deletion, complete genome	Coronaviridae	Alphacoronavirus	Alphacoronavirus 1		2013-06-01	Belgium	29161	ssRNA(+)	FALSE	FALSE	Felis catus
KU215422.1	Coronaviridae_10	Feline coronavirus isolate Cat2_day21_withoutdeletion, complete genome	Coronaviridae	Alphacoronavirus	Alphacoronavirus 1		2013-06-01	Belgium	29262	ssRNA(+)	FALSE	FALSE	Felis catus
KU215423.1	Coronaviridae_10	Feline coronavirus isolate Cat3_day9, complete genome	Coronaviridae	Alphacoronavirus	Alphacoronavirus 1		2013-06-01	Belgium	29262	ssRNA(+)	FALSE	FALSE	Felis catus
KU215424.1	Coronaviridae_10	Feline coronavirus isolate Cat1_day28_deletion, complete genome	Coronaviridae	Alphacoronavirus	Alphacoronavirus 1		2013-06-01	Belgium	29253	ssRNA(+)	FALSE	FALSE	Felis catus
KU215425.1	Coronaviridae_10	Feline coronavirus isolate Cat1_day28_withoutdeletion, complete genome	Coronaviridae	Alphacoronavirus	Alphacoronavirus 1		2013-06-01	Belgium	29262	ssRNA(+)	FALSE	FALSE	Felis catus
KU215426.1	Coronaviridae_10	Feline coronavirus isolate Cat2_day84, complete genome	Coronaviridae	Alphacoronavirus	Alphacoronavirus 1		2013-06-01	Belgium	29262	ssRNA(+)	FALSE	FALSE	Felis catus
KU215427.1	Coronaviridae_10	Feline coronavirus isolate Cat3_day28_deletion, complete genome	Coronaviridae	Alphacoronavirus	Alphacoronavirus 1		2013-06-01	Belgium	29238	ssRNA(+)	FALSE	FALSE	Felis catus
KU215428.1	Coronaviridae_10	Feline coronavirus isolate Cat3_day28_withoutdeletion, complete genome	Coronaviridae	Alphacoronavirus	Alphacoronavirus 1		2013-06-01	Belgium	29262	ssRNA(+)	FALSE	FALSE	Felis catus
KU242423.1	Coronaviridae_26	Middle East respiratory syndrome coronavirus isolate Camel/UAE/D511-14, complete genome	Coronaviridae	Betacoronavirus	Middle East respiratory syndrome-related coronavirus		2014-03-12	United Arab Emirates	30112	ssRNA(+)	FALSE	FALSE	Camelus dromedarius
KU242424.1	Coronaviridae_26	Middle East respiratory syndrome coronavirus isolate Camel/UAE/D469-14, complete genome	Coronaviridae	Betacoronavirus	Middle East respiratory syndrome-related coronavirus		2014-03-04	United Arab Emirates	30112	ssRNA(+)	FALSE	FALSE	Camelus dromedarius
KU252649.1	Coronaviridae_17	Porcine epidemic diarrhea virus strain YC2014, complete genome	Coronaviridae	Alphacoronavirus	Porcine epidemic diarrhea virus		2014-05-08	China	28077	ssRNA(+)	FALSE	FALSE	Sus scrofa
KU291448.1	Coronaviridae_2	Human coronavirus 229E isolate HCoV-229E/BN1/GER/2015, complete genome	Coronaviridae	Alphacoronavirus	Human coronavirus 229E		2015-06-01	Germany	27022	ssRNA(+)	FALSE	FALSE	Homo sapiens
KU291449.1	Coronaviridae_2	Camel alphacoronavirus Camel229E isolate Camel229E-CoV/KCSP1/KEN/2015, complete genome	Coronaviridae	Alphacoronavirus	Human coronavirus 229E		2015-06-01	Kenya	27164	ssRNA(+)	FALSE	FALSE	Camelus dromedarius
KU297956.1	Coronaviridae_17	Porcine epidemic diarrhea virus strain SLO/JH-11/2015, complete genome	Coronaviridae	Alphacoronavirus	Porcine epidemic diarrhea virus	feces	2015-09-03	Slovenia	28028	ssRNA(+)	FALSE	FALSE	Sus scrofa
KU308549.1	Coronaviridae_26	Middle East respiratory syndrome-related coronavirus isolate Korea/Seoul/SNU1-035/2015, complete genome	Coronaviridae	Betacoronavirus	Middle East respiratory syndrome-related coronavirus	lung, oronasopharynx	2015-06-08	South Korea	30119	ssRNA(+)	FALSE	FALSE	Homo sapiens
KU317090.1	Coronaviridae_6	Infectious bronchitis virus strain SAIBK2, complete genome	Coronaviridae	Gammacoronavirus	Avian coronavirus		2011-06-01	China	27669	ssRNA(+)	FALSE	FALSE	Gallus gallus
KU356856.1	Coronaviridae_6	Infectious bronchitis virus strain ck/CH/SCYB/140913, complete genome	Coronaviridae	Gammacoronavirus	Avian coronavirus		2014-09-15	China	27647	ssRNA(+)	FALSE	FALSE	Gallus gallus
KU361187.1	Coronaviridae_6	Infectious bronchitis virus isolate CK/CH/2010/JT-1, complete genome	Coronaviridae	Gammacoronavirus	Avian coronavirus		2010-06-01	China	27670	ssRNA(+)	FALSE	FALSE	Gallus gallus
KU361188.1	Coronaviridae_6	Infectious bronchitis virus isolate CK/CH/2014/QL1403, complete genome	Coronaviridae	Gammacoronavirus	Avian coronavirus		2014-06-01	China	27691	ssRNA(+)	FALSE	FALSE	Gallus gallus
KU380331.1	Coronaviridae_17	Porcine epidemic diarrhea virus isolate CH-SD01, complete genome	Coronaviridae	Alphacoronavirus	Porcine epidemic diarrhea virus		2015-05-01	China	28035	ssRNA(+)	FALSE	FALSE	Sus scrofa
KU558701.1	Coronaviridae_17	Porcine epidemic diarrhea virus isolate ZJU/G2/2013, complete genome	Coronaviridae	Alphacoronavirus	Porcine epidemic diarrhea virus	feces	2013-11-14	China	28038	ssRNA(+)	FALSE	FALSE	Sus scrofa
KU558922.1	Coronaviridae_4	Betacoronavirus 1 isolate Buffalo coronavirus B1-24F, complete genome	Coronaviridae	Betacoronavirus	Betacoronavirus 1		2014-10-01	Bangladesh	31039	ssRNA(+)	FALSE	FALSE	Bubalus bubalis
KU558923.1	Coronaviridae_4	Betacoronavirus 1 isolate Buffalo coronavirus B1-28F, complete genome	Coronaviridae	Betacoronavirus	Betacoronavirus 1		2014-10-01	Bangladesh	30985	ssRNA(+)	FALSE	FALSE	Bubalus bubalis
KU569509.1	Coronaviridae_17	Porcine epidemic diarrhea virus strain COL/Cundinamarca/2014 from Colombia, complete genome	Coronaviridae	Alphacoronavirus	Porcine epidemic diarrhea virus		2014-05-02	Colombia	28012	ssRNA(+)	FALSE	FALSE	Sus scrofa
KU646831.1	Coronaviridae_17	Porcine epidemic diarrhea virus isolate AH2012/12, complete genome	Coronaviridae	Alphacoronavirus	Porcine epidemic diarrhea virus		2012-06-01	China	28036	ssRNA(+)	FALSE	FALSE	Sus scrofa
KU664503.1	Coronaviridae_17	Porcine epidemic diarrhea virus isolate ZJU/G1/2013, complete genome	Coronaviridae	Alphacoronavirus	Porcine epidemic diarrhea virus		2013-11-14	China	27994	ssRNA(+)	FALSE	FALSE	Sus scrofa
KU710264.1	Coronaviridae_26	Middle East respiratory syndrome-related coronavirus isolate Hu/Taif/KSA-7032/2014, complete genome	Coronaviridae	Betacoronavirus	Middle East respiratory syndrome-related coronavirus	blood	2014-11-04	Saudi Arabia	30096	ssRNA(+)	FALSE	FALSE	Homo sapiens
KU729220.1	Coronaviridae_5	Transmissible gastroenteritis virus strain TH-98, complete genome	Coronaviridae	Alphacoronavirus	Alphacoronavirus 1		1998-02-10	China	28539	ssRNA(+)	FALSE	FALSE	Sus scrofa
KU762338.1	Coronaviridae_41	Rousettus bat coronavirus isolate GCCDC1 356, complete genome	Coronaviridae	Betacoronavirus	Rousettus bat coronavirus GCCDC1	feces	2014-05-28	China	30161	ssRNA(+)	FALSE	FALSE	Rousettus leschenaultii
KU847996.1	Coronaviridae_17	Porcine epidemic diarrhea virus strain ZL29, complete genome	Coronaviridae	Alphacoronavirus	Porcine epidemic diarrhea virus	feces, abdominal cavity	2015-07-26	China	27989	ssRNA(+)	FALSE	FALSE	Sus scrofa
KU851859.1	Coronaviridae_26	Middle East respiratory syndrome-related coronavirus isolate Hu/Jeddah-KSA-3RS2702/2015, complete genome	Coronaviridae	Betacoronavirus	Middle East respiratory syndrome-related coronavirus	lung, oronasopharynx	2015-07-12	Saudi Arabia	30076	ssRNA(+)	FALSE	FALSE	Homo sapiens
KU851863.1	Coronaviridae_26	Middle East respiratory syndrome-related coronavirus isolate Hu/Riyadh-KSA-16077/2015, complete genome	Coronaviridae	Betacoronavirus	Middle East respiratory syndrome-related coronavirus	lung, oronasopharynx	2015-08-27	Saudi Arabia	30096	ssRNA(+)	FALSE	FALSE	Homo sapiens
KU886219.1	Coronaviridae_4	Bovine coronavirus strain BCV-AKS-01, complete genome	Coronaviridae	Betacoronavirus	Betacoronavirus 1		2015-05-30	China	30975	ssRNA(+)	FALSE	FALSE	Bos taurus
KU900738.1	Coronaviridae_6	Infectious bronchitis virus strain SNU-8065, complete genome	Coronaviridae	Gammacoronavirus	Avian coronavirus		2008-06-01	South Korea	27679	ssRNA(+)	FALSE	FALSE	Gallus gallus
KU900739.1	Coronaviridae_6	Infectious bronchitis virus strain QIA-03342, complete genome	Coronaviridae	Gammacoronavirus	Avian coronavirus		2003-06-01	South Korea	27684	ssRNA(+)	FALSE	FALSE	Gallus gallus
KU900740.1	Coronaviridae_6	Infectious bronchitis virus strain QIA-KR/D79/05, complete genome	Coronaviridae	Gammacoronavirus	Avian coronavirus		2005-06-01	South Korea	27682	ssRNA(+)	FALSE	FALSE	Gallus gallus
KU900741.1	Coronaviridae_6	Infectious bronchitis virus strain SNU-9106, complete genome	Coronaviridae	Gammacoronavirus	Avian coronavirus		2009-06-01	South Korea	27684	ssRNA(+)	FALSE	FALSE	Gallus gallus
KU900742.1	Coronaviridae_6	Infectious bronchitis virus strain SNU-11045, complete genome	Coronaviridae	Gammacoronavirus	Avian coronavirus		2011-06-01	South Korea	27679	ssRNA(+)	FALSE	FALSE	Gallus gallus
KU900743.1	Coronaviridae_6	Infectious bronchitis virus strain SNU-10043, complete genome	Coronaviridae	Gammacoronavirus	Avian coronavirus		2010-06-01	South Korea	27683	ssRNA(+)	FALSE	FALSE	Gallus gallus
KU900744.1	Coronaviridae_6	Infectious bronchitis virus strain QIA-Q43, complete genome	Coronaviridae	Gammacoronavirus	Avian coronavirus		2006-06-01	South Korea	27675	ssRNA(+)	FALSE	FALSE	Gallus gallus
KU973692.1	Coronaviridae_3	UNVERIFIED: Severe acute respiratory syndrome-related coronavirus isolate F46, complete genome	Coronaviridae	Betacoronavirus	Severe acute respiratory syndrome-related coronavirus		2012-06-01	China	29722	ssRNA(+)	FALSE	FALSE	Chiroptera
KU975389.1	Coronaviridae_17	Porcine epidemic diarrhea virus strain CH/SCCD/2014, complete genome	Coronaviridae	Alphacoronavirus	Porcine epidemic diarrhea virus	feces	2014-11-15	China	28044	ssRNA(+)	FALSE	FALSE	Sus scrofa
KU981059.1	Coronaviridae_18	Porcine deltacoronavirus strain NH, complete genome	Coronaviridae	Deltacoronavirus	Coronavirus HKU15	abdominal cavity	2015-02-16	China	25420	ssRNA(+)	FALSE	FALSE	Sus scrofa
KU981060.1	Coronaviridae_18	Porcine deltacoronavirus strain NH isolate passage 0, complete genome	Coronaviridae	Deltacoronavirus	Coronavirus HKU15	abdominal cavity	2015-04-15	China	25420	ssRNA(+)	FALSE	FALSE
KU981061.1	Coronaviridae_18	Porcine deltacoronavirus strain NH isolate passage 5, complete genome	Coronaviridae	Deltacoronavirus	Coronavirus HKU15	abdominal cavity	2015-07-18	China	25420	ssRNA(+)	FALSE	FALSE
KU981062.1	Coronaviridae_18	Porcine deltacoronavirus strain NH isolate passage 10, complete genome	Coronaviridae	Deltacoronavirus	Coronavirus HKU15	abdominal cavity	2015-12-30	China	25420	ssRNA(+)	FALSE	FALSE
KU982966.1	Coronaviridae_17	Porcine epidemic diarrhea virus strain PEDV/USA/Texas134/2015, complete genome	Coronaviridae	Alphacoronavirus	Porcine epidemic diarrhea virus	feces	2015-10-22	USA	27994	ssRNA(+)	FALSE	FALSE	Sus scrofa
KU982967.1	Coronaviridae_17	Porcine epidemic diarrhea virus strain PEDV/USA/Kansas126/2015, complete genome	Coronaviridae	Alphacoronavirus	Porcine epidemic diarrhea virus	feces	2015-10-21	USA	28000	ssRNA(+)	FALSE	FALSE	Sus scrofa
KU982968.1	Coronaviridae_17	Porcine epidemic diarrhea virus strain PEDV/USA/Oklahoma133/2015, complete genome	Coronaviridae	Alphacoronavirus	Porcine epidemic diarrhea virus	feces	2015-11-06	USA	27995	ssRNA(+)	FALSE	FALSE	Sus scrofa
KU982969.1	Coronaviridae_17	Porcine epidemic diarrhea virus strain PEDV/USA/Iowa127/2015, complete genome	Coronaviridae	Alphacoronavirus	Porcine epidemic diarrhea virus		2015-10-21	USA	28004	ssRNA(+)	FALSE	FALSE	Sus scrofa
KU982970.1	Coronaviridae_17	Porcine epidemic diarrhea virus strain PEDV/USA/NorthDakota93/2015, complete genome	Coronaviridae	Alphacoronavirus	Porcine epidemic diarrhea virus	feces	2015-11-06	USA	28004	ssRNA(+)	FALSE	FALSE	Sus scrofa
KU982971.1	Coronaviridae_17	Porcine epidemic diarrhea virus strain PEDV/USA/Minnesota4/2015, complete genome	Coronaviridae	Alphacoronavirus	Porcine epidemic diarrhea virus	feces	2015-01-09	USA	28004	ssRNA(+)	FALSE	FALSE	Sus scrofa
KU982972.1	Coronaviridae_17	Porcine epidemic diarrhea virus strain PEDV/USA/Minnesota129/2015, complete genome	Coronaviridae	Alphacoronavirus	Porcine epidemic diarrhea virus	saliva, oronasopharynx	2015-10-22	USA	28004	ssRNA(+)	FALSE	FALSE	Sus scrofa
KU982973.1	Coronaviridae_17	Porcine epidemic diarrhea virus strain PEDV/USA/Minnesota135/2015, complete genome	Coronaviridae	Alphacoronavirus	Porcine epidemic diarrhea virus	feces	2015-11-12	USA	28000	ssRNA(+)	FALSE	FALSE	Sus scrofa
KU982974.1	Coronaviridae_17	Porcine epidemic diarrhea virus strain PEDV/USA/Minnesota123/2015, complete genome	Coronaviridae	Alphacoronavirus	Porcine epidemic diarrhea virus	feces	2015-10-06	USA	27994	ssRNA(+)	FALSE	FALSE	Sus scrofa
KU982975.1	Coronaviridae_17	Porcine epidemic diarrhea virus strain PEDV/USA/Missouri130/2015, complete genome	Coronaviridae	Alphacoronavirus	Porcine epidemic diarrhea virus		2015-10-26	USA	28004	ssRNA(+)	FALSE	FALSE	Sus scrofa
KU982976.1	Coronaviridae_17	Porcine epidemic diarrhea virus strain PEDV/USA/Texas128/2015, complete genome	Coronaviridae	Alphacoronavirus	Porcine epidemic diarrhea virus	feces	2015-10-22	USA	27995	ssRNA(+)	FALSE	FALSE	Sus scrofa
KU982977.1	Coronaviridae_17	Porcine epidemic diarrhea virus strain PEDV/USA/Texas132/2015, complete genome	Coronaviridae	Alphacoronavirus	Porcine epidemic diarrhea virus	feces	2015-11-05	USA	28003	ssRNA(+)	FALSE	FALSE	Sus scrofa
KU982978.1	Coronaviridae_17	Porcine epidemic diarrhea virus strain PEDV/USA/Nebraska108/2015, complete genome	Coronaviridae	Alphacoronavirus	Porcine epidemic diarrhea virus	feces	2015-12-04	USA	28003	ssRNA(+)	FALSE	FALSE	Sus scrofa
KU982979.1	Coronaviridae_17	Porcine epidemic diarrhea virus strain PEDV/USA/Minnesota131/2015, complete genome	Coronaviridae	Alphacoronavirus	Porcine epidemic diarrhea virus		2015-11-04	USA	28003	ssRNA(+)	FALSE	FALSE	Sus scrofa
KU982980.1	Coronaviridae_17	Porcine epidemic diarrhea virus strain PEDV/USA/Minnesota125/2015, complete genome	Coronaviridae	Alphacoronavirus	Porcine epidemic diarrhea virus		2015-10-20	USA	28000	ssRNA(+)	FALSE	FALSE	Sus scrofa
KU982981.1	Coronaviridae_17	Porcine epidemic diarrhea virus strain PEDV/USA/Minnesota124/2015, complete genome	Coronaviridae	Alphacoronavirus	Porcine epidemic diarrhea virus	feces	2015-10-19	USA	28004	ssRNA(+)	FALSE	FALSE	Sus scrofa
KU984334.1	Coronaviridae_18	Porcine deltacoronavirus isolate TT_1115, complete genome	Coronaviridae	Deltacoronavirus	Coronavirus HKU15	feces, abdominal cavity	2015-11-15	Thailand	25403	ssRNA(+)	FALSE	FALSE	Sus scrofa
KX016034.1	Coronaviridae_17	Porcine epidemic diarrhea virus isolate CH/GDZHDM/1401, complete genome	Coronaviridae	Alphacoronavirus	Porcine epidemic diarrhea virus	feces, abdominal cavity	2014-01-04	China	27993	ssRNA(+)	FALSE	FALSE	Sus scrofa
KX022602.1	Coronaviridae_18	Porcine deltacoronavirus strain PDCoV/USA/Iowa136/2015, complete genome	Coronaviridae	Deltacoronavirus	Coronavirus HKU15	feces	2015-10-15	USA	25382	ssRNA(+)	FALSE	FALSE	Sus scrofa
KX022603.1	Coronaviridae_18	Porcine deltacoronavirus strain PDCoV/USA/Minnesota140/2015, complete genome	Coronaviridae	Deltacoronavirus	Coronavirus HKU15	feces	2015-12-18	USA	25394	ssRNA(+)	FALSE	FALSE	Sus scrofa
KX022604.1	Coronaviridae_18	Porcine deltacoronavirus strain PDCoV/USA/Nebraska137/2015, complete genome	Coronaviridae	Deltacoronavirus	Coronavirus HKU15	feces	2015-11-27	USA	25382	ssRNA(+)	FALSE	FALSE	Sus scrofa
KX022605.1	Coronaviridae_18	Porcine deltacoronavirus strain PDCoV/USA/Nebraska145/2015, complete genome	Coronaviridae	Deltacoronavirus	Coronavirus HKU15	feces	2015-12-21	USA	25320	ssRNA(+)	FALSE	FALSE	Sus scrofa
KX034094.1	Coronaviridae_26	Middle East respiratory syndrome coronavirus isolate MERS-CoV/KOR/Seoul/050-1-2015, complete genome	Coronaviridae	Betacoronavirus	Middle East respiratory syndrome-related coronavirus	lung, oronasopharynx	2015-06-11	South Korea	30111	ssRNA(+)	FALSE	FALSE	Homo sapiens
KX034095.1	Coronaviridae_26	Middle East respiratory syndrome coronavirus isolate MERS-CoV/KOR/Seoul/066-2015, complete genome	Coronaviridae	Betacoronavirus	Middle East respiratory syndrome-related coronavirus	lung, oronasopharynx	2015-06-04	South Korea	30118	ssRNA(+)	FALSE	FALSE	Homo sapiens
KX034096.1	Coronaviridae_26	Middle East respiratory syndrome coronavirus isolate MERS-CoV/KOR/Seoul/077-2-2015, complete genome	Coronaviridae	Betacoronavirus	Middle East respiratory syndrome-related coronavirus	lung	2015-06-17	South Korea	30082	ssRNA(+)	FALSE	FALSE	Homo sapiens
KX034097.1	Coronaviridae_26	Middle East respiratory syndrome coronavirus isolate MERS-CoV/KOR/Seoul/080-3-2015, complete genome	Coronaviridae	Betacoronavirus	Middle East respiratory syndrome-related coronavirus	lung, oronasopharynx	2015-06-17	South Korea	30118	ssRNA(+)	FALSE	FALSE	Homo sapiens
KX034098.1	Coronaviridae_26	Middle East respiratory syndrome coronavirus isolate MERS-CoV/KOR/Seoul/162-1-2015, complete genome	Coronaviridae	Betacoronavirus	Middle East respiratory syndrome-related coronavirus	lung	2015-06-22	South Korea	30106	ssRNA(+)	FALSE	FALSE	Homo sapiens
KX034099.1	Coronaviridae_26	Middle East respiratory syndrome coronavirus isolate MERS-CoV/KOR/Seoul/169-2015, complete genome	Coronaviridae	Betacoronavirus	Middle East respiratory syndrome-related coronavirus	lung, oronasopharynx	2015-06-26	South Korea	30110	ssRNA(+)	FALSE	FALSE	Homo sapiens
KX034100.1	Coronaviridae_26	Middle East respiratory syndrome coronavirus isolate MERS-CoV/KOR/Seoul/177-3-2015, complete genome	Coronaviridae	Betacoronavirus	Middle East respiratory syndrome-related coronavirus	lung	2015-07-03	South Korea	30118	ssRNA(+)	FALSE	FALSE	Homo sapiens
KX058031.1	Coronaviridae_17	UNVERIFIED: Porcine epidemic diarrhea virus strain CH/JX/01/P0, complete genome	Coronaviridae	Alphacoronavirus	Porcine epidemic diarrhea virus		2014-12-05	China	28054	ssRNA(+)	FALSE	FALSE	Sus scrofa
KX058032.1	Coronaviridae_17	UNVERIFIED: Porcine epidemic diarrhea virus strain CH/JX/01/P5, complete genome	Coronaviridae	Alphacoronavirus	Porcine epidemic diarrhea virus		2014-12-05	China	28054	ssRNA(+)	FALSE	FALSE	Sus scrofa
KX058033.1	Coronaviridae_17	UNVERIFIED: Porcine epidemic diarrhea virus strain CH/JX/01/P30, complete genome	Coronaviridae	Alphacoronavirus	Porcine epidemic diarrhea virus		2014-12-05	China	28054	ssRNA(+)	FALSE	FALSE	Sus scrofa
KX064280.1	Coronaviridae_17	Porcine epidemic diarrhea virus isolate SD2014, complete genome	Coronaviridae	Alphacoronavirus	Porcine epidemic diarrhea virus	feces	2014-10-20	China	28036	ssRNA(+)	FALSE	FALSE	Sus scrofa
KX066126.1	Coronaviridae_17	Porcine epidemic diarrhea virus strain BJ-2011-C, complete genome	Coronaviridae	Alphacoronavirus	Porcine epidemic diarrhea virus		2011-11-15	China	28038	ssRNA(+)	FALSE	FALSE	Sus scrofa
KX077987.1	Coronaviridae_6	Infectious bronchitis virus strain ck/CH/LDL/150434-III, complete genome	Coronaviridae	Gammacoronavirus	Avian coronavirus		2015-06-01	China	27666	ssRNA(+)	FALSE	FALSE	Gallus gallus
KX108937.1	Coronaviridae_26	Middle East respiratory syndrome-related coronavirus isolate D1164.1/14, complete genome	Coronaviridae	Betacoronavirus	Middle East respiratory syndrome-related coronavirus		2014-06-02	United Arab Emirates	30097	ssRNA(+)	FALSE	FALSE	Camelus dromedarius
KX108938.1	Coronaviridae_26	Middle East respiratory syndrome-related coronavirus isolate D2597.2/14, complete genome	Coronaviridae	Betacoronavirus	Middle East respiratory syndrome-related coronavirus		2014-12-13	United Arab Emirates	30101	ssRNA(+)	FALSE	FALSE	Camelus dromedarius
KX108939.1	Coronaviridae_26	Middle East respiratory syndrome-related coronavirus isolate D252/15, complete genome	Coronaviridae	Betacoronavirus	Middle East respiratory syndrome-related coronavirus		2015-01-30	United Arab Emirates	30099	ssRNA(+)	FALSE	FALSE	Camelus dromedarius
KX108940.1	Coronaviridae_26	Middle East respiratory syndrome-related coronavirus isolate D374/15, complete genome	Coronaviridae	Betacoronavirus	Middle East respiratory syndrome-related coronavirus		2015-02-12	United Arab Emirates	30099	ssRNA(+)	FALSE	FALSE	Camelus dromedarius
KX108941.1	Coronaviridae_26	Middle East respiratory syndrome-related coronavirus isolate D383/15, complete genome	Coronaviridae	Betacoronavirus	Middle East respiratory syndrome-related coronavirus		2015-02-14	United Arab Emirates	30099	ssRNA(+)	FALSE	FALSE	Camelus dromedarius
KX108942.1	Coronaviridae_26	Middle East respiratory syndrome-related coronavirus isolate D389/15, complete genome	Coronaviridae	Betacoronavirus	Middle East respiratory syndrome-related coronavirus		2015-02-15	United Arab Emirates	30099	ssRNA(+)	FALSE	FALSE	Camelus dromedarius
KX108943.1	Coronaviridae_26	Middle East respiratory syndrome-related coronavirus isolate D998/15, complete genome	Coronaviridae	Betacoronavirus	Middle East respiratory syndrome-related coronavirus		2015-04-23	United Arab Emirates	30088	ssRNA(+)	FALSE	FALSE	Camelus dromedarius
KX108944.1	Coronaviridae_26	Middle East respiratory syndrome-related coronavirus isolate D1157/15, complete genome	Coronaviridae	Betacoronavirus	Middle East respiratory syndrome-related coronavirus		2015-05-12	United Arab Emirates	30099	ssRNA(+)	FALSE	FALSE	Camelus dromedarius
KX108945.1	Coronaviridae_26	Middle East respiratory syndrome-related coronavirus isolate D1271/15, complete genome	Coronaviridae	Betacoronavirus	Middle East respiratory syndrome-related coronavirus		2015-05-29	United Arab Emirates	30101	ssRNA(+)	FALSE	FALSE	Camelus dromedarius
KX108946.1	Coronaviridae_26	Middle East respiratory syndrome-related coronavirus isolate D1189.1/15, complete genome	Coronaviridae	Betacoronavirus	Middle East respiratory syndrome-related coronavirus		2015-05-18	United Arab Emirates	30099	ssRNA(+)	FALSE	FALSE	Camelus dromedarius
KX118627.1	Coronaviridae_18	Porcine deltacoronavirus isolate P1_16_BTL_0115/PDCoV/2016/Lao, complete genome	Coronaviridae	Deltacoronavirus	Coronavirus HKU15	abdominal cavity	2016-01-20	Laos	25405	ssRNA(+)	FALSE	FALSE	Sus scrofa
KX154684.1	Coronaviridae_26	Middle East respiratory syndrome-related coronavirus isolate Hu/Riyadh-KSA-11739/2016, complete genome	Coronaviridae	Betacoronavirus	Middle East respiratory syndrome-related coronavirus	lung, oronasopharynx	2016-02-15	Saudi Arabia	30096	ssRNA(+)	FALSE	FALSE	Homo sapiens
KX154689.1	Coronaviridae_26	Middle East respiratory syndrome-related coronavirus isolate Hu/Riyadh-KSA-10208/2016, complete genome	Coronaviridae	Betacoronavirus	Middle East respiratory syndrome-related coronavirus	lung, oronasopharynx	2016-01-15	Saudi Arabia	30096	ssRNA(+)	FALSE	FALSE	Homo sapiens
KX154691.1	Coronaviridae_26	Middle East respiratory syndrome-related coronavirus isolate Hu/Riyadh-KSA-12832/2016, complete genome	Coronaviridae	Betacoronavirus	Middle East respiratory syndrome-related coronavirus	lung, oronasopharynx	2016-02-25	Saudi Arabia	30096	ssRNA(+)	FALSE	FALSE	Homo sapiens
KX154692.1	Coronaviridae_26	Middle East respiratory syndrome-related coronavirus isolate Hu/Riyadh-KSA-12969/2016, complete genome	Coronaviridae	Betacoronavirus	Middle East respiratory syndrome-related coronavirus	lung, oronasopharynx	2016-02-27	Saudi Arabia	30096	ssRNA(+)	FALSE	FALSE	Homo sapiens
KX154693.1	Coronaviridae_26	Middle East respiratory syndrome-related coronavirus isolate Hu/Riyadh-KSA-13127/2016, complete genome	Coronaviridae	Betacoronavirus	Middle East respiratory syndrome-related coronavirus	lung, oronasopharynx	2016-02-29	Saudi Arabia	30096	ssRNA(+)	FALSE	FALSE	Homo sapiens
KX179500.1	Coronaviridae_24	Human coronavirus NL63 strain NL63/UF-2/2015, complete genome	Coronaviridae	Alphacoronavirus	Human coronavirus NL63	oronasopharynx	2015-09-15	USA	27553	ssRNA(+)	FALSE	FALSE	Homo sapiens
KX185056.1	Coronaviridae_6	Infectious bronchitis virus strain LD3, complete genome	Coronaviridae	Gammacoronavirus	Avian coronavirus		2014-06-01	China	27676	ssRNA(+)	FALSE	FALSE	Gallus gallus
KX185057.1	Coronaviridae_6	Infectious bronchitis virus strain ck/CH/LHLJ/95I, complete genome	Coronaviridae	Gammacoronavirus	Avian coronavirus		2013-06-01	China	27802	ssRNA(+)	FALSE	FALSE	Gallus gallus
KX185058.1	Coronaviridae_6	Infectious bronchitis virus strain ck/CH/LGS/08I, complete genome	Coronaviridae	Gammacoronavirus	Avian coronavirus		2014-06-01	China	27678	ssRNA(+)	FALSE	FALSE	Gallus gallus
KX219791.1	Coronaviridae_6	Infectious bronchitis virus strain ck/CH/LHLJ/07I, complete genome	Coronaviridae	Gammacoronavirus	Avian coronavirus		2007-02-15	China	27648	ssRNA(+)	FALSE	FALSE	Gallus gallus
KX219792.1	Coronaviridae_6	Infectious bronchitis virus strain ck/CH/LGS/06I, complete genome	Coronaviridae	Gammacoronavirus	Avian coronavirus		2006-05-15	China	27674	ssRNA(+)	FALSE	FALSE	Gallus gallus
KX219793.1	Coronaviridae_6	Infectious bronchitis virus strain ck/CH/LHB/111168, complete genome	Coronaviridae	Gammacoronavirus	Avian coronavirus		2011-11-15	China	27697	ssRNA(+)	FALSE	FALSE	Gallus gallus
KX219794.1	Coronaviridae_6	Infectious bronchitis virus strain ck/CH/LJS/101109, complete genome	Coronaviridae	Gammacoronavirus	Avian coronavirus		2010-11-15	China	27675	ssRNA(+)	FALSE	FALSE	Gallus gallus
KX219795.1	Coronaviridae_6	Infectious bronchitis virus strain ck/CH/LSD/150311, complete genome	Coronaviridae	Gammacoronavirus	Avian coronavirus		2015-03-15	China	27682	ssRNA(+)	FALSE	FALSE	Gallus gallus
KX219796.1	Coronaviridae_6	Infectious bronchitis virus strain ck/CH/LXJ/111265, complete genome	Coronaviridae	Gammacoronavirus	Avian coronavirus		2011-12-15	China	27640	ssRNA(+)	FALSE	FALSE	Gallus gallus
KX219797.1	Coronaviridae_6	Infectious bronchitis virus strain ck/CH/LXJ/02I, complete genome	Coronaviridae	Gammacoronavirus	Avian coronavirus		2002-01-15	China	27684	ssRNA(+)	FALSE	FALSE	Gallus gallus
KX219798.1	Coronaviridae_6	Infectious bronchitis virus strain ck/CH/LSD/120913, complete genome	Coronaviridae	Gammacoronavirus	Avian coronavirus		2012-09-15	China	27682	ssRNA(+)	FALSE	FALSE	Gallus gallus
KX219799.1	Coronaviridae_6	Infectious bronchitis virus strain ck/CH/LSD/130211, complete genome	Coronaviridae	Gammacoronavirus	Avian coronavirus		2013-02-15	China	27685	ssRNA(+)	FALSE	FALSE	Gallus gallus
KX219800.1	Coronaviridae_6	Infectious bronchitis virus strain ck/CH/LSD/130611, complete genome	Coronaviridae	Gammacoronavirus	Avian coronavirus		2013-06-15	China	27675	ssRNA(+)	FALSE	FALSE	Gallus gallus
KX219801.1	Coronaviridae_6	Infectious bronchitis virus strain ck/CH/LSD/120437, complete genome	Coronaviridae	Gammacoronavirus	Avian coronavirus		2012-04-15	China	27667	ssRNA(+)	FALSE	FALSE	Gallus gallus
KX236000.1	Coronaviridae_6	Infectious bronchitis virus strain ck/CH/LSD/110912, complete genome	Coronaviridae	Gammacoronavirus	Avian coronavirus		2011-06-01	China	27685	ssRNA(+)	FALSE	FALSE	Gallus gallus
KX236001.1	Coronaviridae_6	Infectious bronchitis virus strain ck/CH/LSD/03I, complete genome	Coronaviridae	Gammacoronavirus	Avian coronavirus		2003-06-01	China	27631	ssRNA(+)	FALSE	FALSE	Gallus gallus
KX236002.1	Coronaviridae_6	Infectious bronchitis virus strain ck/CH/LSD/111037, complete genome	Coronaviridae	Gammacoronavirus	Avian coronavirus		2011-06-01	China	27674	ssRNA(+)	FALSE	FALSE	Gallus gallus
KX236003.1	Coronaviridae_6	Infectious bronchitis virus strain ck/CH/LSD/111025, complete genome	Coronaviridae	Gammacoronavirus	Avian coronavirus		2011-06-01	China	27685	ssRNA(+)	FALSE	FALSE	Gallus gallus
KX236004.1	Coronaviridae_6	Infectious bronchitis virus strain ck/CH/LHLJ/150701, complete genome	Coronaviridae	Gammacoronavirus	Avian coronavirus		2015-06-01	China	27688	ssRNA(+)	FALSE	FALSE	Gallus gallus
KX236005.1	Coronaviridae_6	Infectious bronchitis virus strain ck/CH/LJL/08-1, complete genome	Coronaviridae	Gammacoronavirus	Avian coronavirus		2008-06-01	China	27657	ssRNA(+)	FALSE	FALSE	Gallus gallus
KX236006.1	Coronaviridae_6	Infectious bronchitis virus strain ck/CH/LSD/100305, complete genome	Coronaviridae	Gammacoronavirus	Avian coronavirus		2010-06-01	China	27682	ssRNA(+)	FALSE	FALSE	Gallus gallus
KX236007.1	Coronaviridae_6	Infectious bronchitis virus strain ck/CH/LSD/100408, complete genome	Coronaviridae	Gammacoronavirus	Avian coronavirus		2010-06-01	China	27671	ssRNA(+)	FALSE	FALSE	Gallus gallus
KX236008.1	Coronaviridae_6	Infectious bronchitis virus strain ck/CH/LDL/130325, complete genome	Coronaviridae	Gammacoronavirus	Avian coronavirus		2013-06-01	China	27687	ssRNA(+)	FALSE	FALSE	Gallus gallus
KX236009.1	Coronaviridae_6	Infectious bronchitis virus strain ck/CH/LSX/130132, complete genome	Coronaviridae	Gammacoronavirus	Avian coronavirus		2013-01-15	China	27672	ssRNA(+)	FALSE	FALSE	Gallus gallus
KX236010.1	Coronaviridae_6	Infectious bronchitis virus strain ck/CH/LSD/100412, complete genome	Coronaviridae	Gammacoronavirus	Avian coronavirus		2010-04-15	China	27645	ssRNA(+)	FALSE	FALSE	Gallus gallus
KX236011.1	Coronaviridae_6	Infectious bronchitis virus strain ck/CH/LSD/091203, complete genome	Coronaviridae	Gammacoronavirus	Avian coronavirus		2009-12-15	China	27685	ssRNA(+)	FALSE	FALSE	Gallus gallus
KX236012.1	Coronaviridae_6	Infectious bronchitis virus strain ck/CH/LSD/091003, complete genome	Coronaviridae	Gammacoronavirus	Avian coronavirus		2009-06-01	China	27680	ssRNA(+)	FALSE	FALSE	Gallus gallus
KX236013.1	Coronaviridae_6	Infectious bronchitis virus strain ck/CH/LSD/120742, complete genome	Coronaviridae	Gammacoronavirus	Avian coronavirus		2012-06-01	China	27685	ssRNA(+)	FALSE	FALSE	Gallus gallus
KX236014.1	Coronaviridae_6	Infectious bronchitis virus strain ck/CH/LHB/120497, complete genome	Coronaviridae	Gammacoronavirus	Avian coronavirus		2012-06-01	China	27692	ssRNA(+)	FALSE	FALSE	Gallus gallus
KX236015.1	Coronaviridae_6	Infectious bronchitis virus strain ck/CH/LDL/140709, complete genome	Coronaviridae	Gammacoronavirus	Avian coronavirus		2014-07-15	China	27672	ssRNA(+)	FALSE	FALSE	Gallus gallus
KX236016.1	Coronaviridae_6	Infectious bronchitis virus strain ck/CH/LHB/090921 complete genome	Coronaviridae	Gammacoronavirus	Avian coronavirus		2009-09-15	China	27676	ssRNA(+)	FALSE	FALSE	Gallus gallus
KX247127.1	Coronaviridae_6	Infectious bronchitis virus strain ck/CH/LHB/111190, complete genome	Coronaviridae	Gammacoronavirus	Avian coronavirus		2011-06-01	China	27684	ssRNA(+)	FALSE	FALSE	Gallus gallus
KX247128.1	Coronaviridae_6	Infectious bronchitis virus strain ck/CH/LHB/130569, complete genome	Coronaviridae	Gammacoronavirus	Avian coronavirus		2013-05-15	China	27682	ssRNA(+)	FALSE	FALSE	Gallus gallus
KX247129.1	Coronaviridae_6	Infectious bronchitis virus strain ck/CH/LHB/130337, complete genome	Coronaviridae	Gammacoronavirus	Avian coronavirus		2013-03-15	China	27684	ssRNA(+)	FALSE	FALSE	Gallus gallus
KX247130.1	Coronaviridae_6	Infectious bronchitis virus strain ck/CH/LHB/120402, complete genome	Coronaviridae	Gammacoronavirus	Avian coronavirus		2012-04-15	China	27685	ssRNA(+)	FALSE	FALSE	Gallus gallus
KX252772.1	Coronaviridae_6	Infectious bronchitis virus strain ck/CH/LSHH/03II, complete genome	Coronaviridae	Gammacoronavirus	Avian coronavirus		2003-06-01	China	27682	ssRNA(+)	FALSE	FALSE	Gallus gallus
KX252773.1	Coronaviridae_6	Infectious bronchitis virus strain ck/CH/LHB/140542, complete genome	Coronaviridae	Gammacoronavirus	Avian coronavirus		2014-05-15	China	27667	ssRNA(+)	FALSE	FALSE	Gallus gallus
KX252774.1	Coronaviridae_6	Infectious bronchitis virus strain ck/CH/LHB/130589, complete genome	Coronaviridae	Gammacoronavirus	Avian coronavirus		2013-06-01	China	27682	ssRNA(+)	FALSE	FALSE	Gallus gallus
KX252775.1	Coronaviridae_6	Infectious bronchitis virus strain ck/CH/LHB/130628, complete genome	Coronaviridae	Gammacoronavirus	Avian coronavirus		2013-06-01	China	27680	ssRNA(+)	FALSE	FALSE	Gallus gallus
KX252776.1	Coronaviridae_6	Infectious bronchitis virus strain ck/CH/LHB/131144, complete genome	Coronaviridae	Gammacoronavirus	Avian coronavirus		2013-06-01	China	27685	ssRNA(+)	FALSE	FALSE	Gallus gallus
KX252777.1	Coronaviridae_6	Infectious bronchitis virus strain ck/CH/LSD/07I, complete genome	Coronaviridae	Gammacoronavirus	Avian coronavirus		2007-06-01	China	27685	ssRNA(+)	FALSE	FALSE	Gallus gallus
KX252778.1	Coronaviridae_6	Infectious bronchitis virus strain ck/CH/LJL/05I, complete genome	Coronaviridae	Gammacoronavirus	Avian coronavirus		2005-06-01	China	27677	ssRNA(+)	FALSE	FALSE	Gallus gallus
KX252779.1	Coronaviridae_6	Infectious bronchitis virus strain ck/CH/LLN/06I, complete genome	Coronaviridae	Gammacoronavirus	Avian coronavirus		2006-06-01	China	27684	ssRNA(+)	FALSE	FALSE	Gallus gallus
KX252780.1	Coronaviridae_6	Infectious bronchitis virus strain ck/CH/LLN/090312, complete genome	Coronaviridae	Gammacoronavirus	Avian coronavirus		2009-06-01	China	27674	ssRNA(+)	FALSE	FALSE	Gallus gallus
KX252781.1	Coronaviridae_6	Infectious bronchitis virus strain ck/CH/LHB/150619, complete genome	Coronaviridae	Gammacoronavirus	Avian coronavirus		2015-06-15	China	27681	ssRNA(+)	FALSE	FALSE	Gallus gallus
KX252782.1	Coronaviridae_6	Infectious bronchitis virus strain ck/CH/LLN/07I, complete genome	Coronaviridae	Gammacoronavirus	Avian coronavirus		2007-06-01	China	27654	ssRNA(+)	FALSE	FALSE	Gallus gallus
KX252783.1	Coronaviridae_6	Infectious bronchitis virus strain ck/CH/LHLJ/090510, complete genome	Coronaviridae	Gammacoronavirus	Avian coronavirus		2009-06-01	China	27680	ssRNA(+)	FALSE	FALSE	Gallus gallus
KX252784.1	Coronaviridae_6	Infectious bronchitis virus strain ck/CH/LLN/090910, complete genome	Coronaviridae	Gammacoronavirus	Avian coronavirus		2009-06-01	China	27675	ssRNA(+)	FALSE	FALSE	Gallus gallus
KX252785.1	Coronaviridae_6	Infectious bronchitis virus strain ck/CH/LSD/100311, complete genome	Coronaviridae	Gammacoronavirus	Avian coronavirus		2010-06-01	China	27686	ssRNA(+)	FALSE	FALSE	Gallus gallus
KX252786.1	Coronaviridae_6	Infectious bronchitis virus strain ck/CH/LLN/120605, complete genome	Coronaviridae	Gammacoronavirus	Avian coronavirus		2012-06-15	China	27682	ssRNA(+)	FALSE	FALSE	Gallus gallus
KX252787.1	Coronaviridae_6	Infectious bronchitis virus strain ck/CH/LLN/131040, complete genome	Coronaviridae	Gammacoronavirus	Avian coronavirus		2013-10-15	China	27674	ssRNA(+)	FALSE	FALSE	Gallus gallus
KX252788.1	Coronaviridae_6	Infectious bronchitis virus strain ck/CH/LHLJ/08-6, complete genome	Coronaviridae	Gammacoronavirus	Avian coronavirus		2008-06-01	China	27682	ssRNA(+)	FALSE	FALSE	Gallus gallus
KX252789.1	Coronaviridae_6	Infectious bronchitis virus strain ck/CH/LHLJ/090605, complete genome	Coronaviridae	Gammacoronavirus	Avian coronavirus		2009-06-01	China	27685	ssRNA(+)	FALSE	FALSE	Gallus gallus
KX252790.1	Coronaviridae_6	Infectious bronchitis virus strain ck/CH/LHLJ/090515, complete genome	Coronaviridae	Gammacoronavirus	Avian coronavirus		2009-05-15	China	27682	ssRNA(+)	FALSE	FALSE	Gallus gallus
KX252791.1	Coronaviridae_6	Infectious bronchitis virus strain ck/CH/LLN/98I, complete genome	Coronaviridae	Gammacoronavirus	Avian coronavirus		1998-06-01	China	27683	ssRNA(+)	FALSE	FALSE	Gallus gallus
KX259248.1	Coronaviridae_6	Infectious bronchitis virus strain ck/CH/LHN/101211, complete genome	Coronaviridae	Gammacoronavirus	Avian coronavirus		2010-06-01	China	27685	ssRNA(+)	FALSE	FALSE	Gallus gallus
KX259249.1	Coronaviridae_6	Infectious bronchitis virus strain ck/CH/LJL/090330, complete genome	Coronaviridae	Gammacoronavirus	Avian coronavirus		2009-06-01	China	27685	ssRNA(+)	FALSE	FALSE	Gallus gallus
KX259250.1	Coronaviridae_6	Infectious bronchitis virus strain ck/CH/LJS/101113, complete genome	Coronaviridae	Gammacoronavirus	Avian coronavirus		2010-06-01	China	27675	ssRNA(+)	FALSE	FALSE	Gallus gallus
KX259251.1	Coronaviridae_6	Infectious bronchitis virus strain ck/CH/LJS/101237, complete genome	Coronaviridae	Gammacoronavirus	Avian coronavirus		2010-06-01	China	27685	ssRNA(+)	FALSE	FALSE	Gallus gallus
KX259252.1	Coronaviridae_6	Infectious bronchitis virus strain ck/CH/LJS/110439, complete genome	Coronaviridae	Gammacoronavirus	Avian coronavirus		2011-06-01	China	27685	ssRNA(+)	FALSE	FALSE	Gallus gallus
KX259253.1	Coronaviridae_6	Infectious bronchitis virus strain ck/CH/LHN/120338, complete genome	Coronaviridae	Gammacoronavirus	Avian coronavirus		2012-06-01	China	27678	ssRNA(+)	FALSE	FALSE	Gallus gallus
KX259254.1	Coronaviridae_6	Infectious bronchitis virus strain ck/CH/LSD/090314, complete genome	Coronaviridae	Gammacoronavirus	Avian coronavirus		2009-06-01	China	27685	ssRNA(+)	FALSE	FALSE	Gallus gallus
KX259255.1	Coronaviridae_6	Infectious bronchitis virus strain ck/CH/LJS/111111, complete genome	Coronaviridae	Gammacoronavirus	Avian coronavirus		2011-11-15	China	27685	ssRNA(+)	FALSE	FALSE	Gallus gallus
KX259256.1	Coronaviridae_6	Infectious bronchitis virus strain ck/CH/LJS/120552, complete genome	Coronaviridae	Gammacoronavirus	Avian coronavirus		2012-05-15	China	27681	ssRNA(+)	FALSE	FALSE	Gallus gallus
KX259257.1	Coronaviridae_6	Infectious bronchitis virus strain ck/CH/LJS/120848, complete genome	Coronaviridae	Gammacoronavirus	Avian coronavirus		2012-08-15	China	27686	ssRNA(+)	FALSE	FALSE	Gallus gallus
KX266757.1	Coronaviridae_6	Infectious bronchitis virus isolate 3575/08, complete genome	Coronaviridae	Gammacoronavirus	Avian coronavirus		2008-06-01	Taiwan	27231	ssRNA(+)	FALSE	FALSE	Gallus gallus
KX272465.1	Coronaviridae_6	Infectious bronchitis virus isolate AR251-15, complete genome	Coronaviridae	Gammacoronavirus	Avian coronavirus		2014-12-01	Sudan	27646	ssRNA(+)	FALSE	FALSE	Gallus gallus
KX275390.1	Coronaviridae_6	Infectious bronchitis virus strain ck/CH/LHLJ/141103, complete genome	Coronaviridae	Gammacoronavirus	Avian coronavirus		2014-11-15	China	27679	ssRNA(+)	FALSE	FALSE	Gallus gallus
KX275391.1	Coronaviridae_6	Infectious bronchitis virus strain ck/CH/LHLJ/140927, complete genome	Coronaviridae	Gammacoronavirus	Avian coronavirus		2014-06-01	China	27685	ssRNA(+)	FALSE	FALSE	Gallus gallus
KX275392.1	Coronaviridae_6	Infectious bronchitis virus strain ck/CH/LHLJ/110943, complete genome	Coronaviridae	Gammacoronavirus	Avian coronavirus		2009-11-15	China	27685	ssRNA(+)	FALSE	FALSE	Gallus gallus
KX275393.1	Coronaviridae_6	Infectious bronchitis virus strain ck/CH/LHLJ/130705, complete genome	Coronaviridae	Gammacoronavirus	Avian coronavirus		2013-07-15	China	27685	ssRNA(+)	FALSE	FALSE	Gallus gallus
KX275394.1	Coronaviridae_6	Infectious bronchitis virus strain ck/CH/LSD08-8, complete genome	Coronaviridae	Gammacoronavirus	Avian coronavirus		2008-06-01	China	27688	ssRNA(+)	FALSE	FALSE	Gallus gallus
KX289955.1	Coronaviridae_17	Porcine epidemic diarrhea virus isolate HUN/5031/2016, complete genome	Coronaviridae	Alphacoronavirus	Porcine epidemic diarrhea virus	abdominal cavity	2016-03-01	Hungary	28009	ssRNA(+)	FALSE	FALSE	Sus scrofa
KX302860.1	Coronaviridae_6	Infectious bronchitis virus strain ck/CH/LSD08-7, complete genome	Coronaviridae	Gammacoronavirus	Avian coronavirus		2008-06-01	China	27685	ssRNA(+)	FALSE	FALSE	Gallus gallus
KX302861.1	Coronaviridae_6	Infectious bronchitis virus strain ck/CH/LJS/131049, complete genome	Coronaviridae	Gammacoronavirus	Avian coronavirus		2013-06-01	China	27675	ssRNA(+)	FALSE	FALSE	Gallus gallus
KX302862.1	Coronaviridae_6	Infectious bronchitis virus strain ck/CH/LJS/101111, complete genome	Coronaviridae	Gammacoronavirus	Avian coronavirus		2010-11-15	China	27642	ssRNA(+)	FALSE	FALSE	Gallus gallus
KX302863.1	Coronaviridae_6	Infectious bronchitis virus strain ck/CH/LSD/090334, complete genome	Coronaviridae	Gammacoronavirus	Avian coronavirus		2009-03-15	China	27675	ssRNA(+)	FALSE	FALSE	Gallus gallus
KX302864.1	Coronaviridae_6	Infectious bronchitis virus strain ck/CH/LSD/09091, complete genome	Coronaviridae	Gammacoronavirus	Avian coronavirus		2009-09-15	China	27685	ssRNA(+)	FALSE	FALSE	Gallus gallus
KX302865.1	Coronaviridae_6	Infectious bronchitis virus strain ck/CH/LJS/131102, complete genome	Coronaviridae	Gammacoronavirus	Avian coronavirus		2013-06-01	China	27675	ssRNA(+)	FALSE	FALSE	Gallus gallus
KX302866.1	Coronaviridae_6	Infectious bronchitis virus strain ck/CH/LJL/04I, complete genome	Coronaviridae	Gammacoronavirus	Avian coronavirus		2004-06-01	China	27714	ssRNA(+)	FALSE	FALSE	Gallus gallus
KX302867.1	Coronaviridae_6	Infectious bronchitis virus strain ck/CH/LJL/150430, complete genome	Coronaviridae	Gammacoronavirus	Avian coronavirus		2015-06-01	China	27701	ssRNA(+)	FALSE	FALSE	Gallus gallus
KX302868.1	Coronaviridae_6	Infectious bronchitis virus strain ck/CH/LHLJ/130744, complete genome	Coronaviridae	Gammacoronavirus	Avian coronavirus		2013-06-01	China	27610	ssRNA(+)	FALSE	FALSE	Gallus gallus
KX302869.1	Coronaviridae_6	Infectious bronchitis virus strain ck/CH/LHLJ/090806, complete genome	Coronaviridae	Gammacoronavirus	Avian coronavirus		2009-08-15	China	27682	ssRNA(+)	FALSE	FALSE	Gallus gallus
KX302870.1	Coronaviridae_6	Infectious bronchitis virus strain ck/CH/LHLJ/130822, complete genome	Coronaviridae	Gammacoronavirus	Avian coronavirus		2013-06-01	China	27684	ssRNA(+)	FALSE	FALSE	Gallus gallus
KX302871.1	Coronaviridae_6	Infectious bronchitis virus strain ck/CH/LHuB/131123, complete genome	Coronaviridae	Gammacoronavirus	Avian coronavirus		2013-06-01	China	27685	ssRNA(+)	FALSE	FALSE	Gallus gallus
KX302872.1	Coronaviridae_6	Infectious bronchitis virus strain ck/CH/LSD/101115, complete genome	Coronaviridae	Gammacoronavirus	Avian coronavirus		2010-06-01	China	27675	ssRNA(+)	FALSE	FALSE	Gallus gallus
KX302873.1	Coronaviridae_6	Infectious bronchitis virus strain ck/CH/LJL/140924, complete genome	Coronaviridae	Gammacoronavirus	Avian coronavirus		2014-06-01	China	27681	ssRNA(+)	FALSE	FALSE	Gallus gallus
KX302874.1	Coronaviridae_6	Infectious bronchitis virus strain ck/CH/LGS/131148, complete genome	Coronaviridae	Gammacoronavirus	Avian coronavirus		2013-06-01	China	27684	ssRNA(+)	FALSE	FALSE	Gallus gallus
KX302875.1	Coronaviridae_6	Infectious bronchitis virus strain ck/CH/LJL/100512, complete genome	Coronaviridae	Gammacoronavirus	Avian coronavirus		2010-05-15	China	27682	ssRNA(+)	FALSE	FALSE	Gallus gallus
KX344031.1	Coronaviridae_4	Human coronavirus OC43 isolate LRTI_238, complete genome	Coronaviridae	Betacoronavirus	Betacoronavirus 1	oronasopharynx	2011-02-09	Mexico	30713	ssRNA(+)	FALSE	FALSE	Homo sapiens
KX348114.1	Coronaviridae_6	Infectious bronchitis virus strain ck/CH/LDL/05III, complete genome	Coronaviridae	Gammacoronavirus	Avian coronavirus		2005-06-01	China	27687	ssRNA(+)	FALSE	FALSE	Gallus gallus
KX348115.1	Coronaviridae_6	Infectious bronchitis virus strain ck/CH/LAH/120907, complete genome	Coronaviridae	Gammacoronavirus	Avian coronavirus		2012-09-15	China	27685	ssRNA(+)	FALSE	FALSE	Gallus gallus
KX348116.1	Coronaviridae_6	Infectious bronchitis virus strain ck/CH/LBJ/140514, complete genome	Coronaviridae	Gammacoronavirus	Avian coronavirus		2014-05-15	China	27688	ssRNA(+)	FALSE	FALSE	Gallus gallus
KX348117.1	Coronaviridae_6	Infectious bronchitis virus strain ck/CH/LAH/120721, complete genome	Coronaviridae	Gammacoronavirus	Avian coronavirus		2012-07-15	China	27685	ssRNA(+)	FALSE	FALSE	Gallus gallus
KX361343.1	Coronaviridae_18	Porcine deltacoronavirus isolate P1_13_ST1_0213/PDCoV/0213/Thailand, complete genome	Coronaviridae	Deltacoronavirus	Coronavirus HKU15	feces, abdominal cavity	2013-02-15	Thailand	25406	ssRNA(+)	FALSE	FALSE	Sus scrofa
KX361344.1	Coronaviridae_18	Porcine deltacoronavirus isolate P2_13_ST2_0313/PDCoV/0213/Thailand, complete genome	Coronaviridae	Deltacoronavirus	Coronavirus HKU15	feces, abdominal cavity	2013-03-15	Thailand	25406	ssRNA(+)	FALSE	FALSE	Sus scrofa
KX361345.1	Coronaviridae_18	Porcine deltacoronavirus isolate P24_15_NT1_1215/PDCoV/2015/Thailand, complete genome	Coronaviridae	Deltacoronavirus	Coronavirus HKU15	feces, abdominal cavity	2015-12-15	Thailand	25406	ssRNA(+)	FALSE	FALSE	Sus scrofa
KX364290.1	Coronaviridae_6	Infectious bronchitis virus strain ck/CH/LJL/101150, complete genome	Coronaviridae	Gammacoronavirus	Avian coronavirus		2010-06-01	China	27685	ssRNA(+)	FALSE	FALSE	Gallus gallus
KX364291.1	Coronaviridae_6	Infectious bronchitis virus strain ck/CH/LSD/110409, complete genome	Coronaviridae	Gammacoronavirus	Avian coronavirus		2007-06-01	China	27685	ssRNA(+)	FALSE	FALSE	Gallus gallus
KX364292.1	Coronaviridae_6	Infectious bronchitis virus strain ck/CH/LSD/110739, complete genome	Coronaviridae	Gammacoronavirus	Avian coronavirus		2011-06-01	China	27684	ssRNA(+)	FALSE	FALSE	Gallus gallus
KX364293.1	Coronaviridae_6	Infectious bronchitis virus strain ck/CH/LJL/07III, complete genome	Coronaviridae	Gammacoronavirus	Avian coronavirus		2007-06-01	China	27686	ssRNA(+)	FALSE	FALSE	Gallus gallus
KX364294.1	Coronaviridae_6	Infectious bronchitis virus strain ck/CH/LBJ/140528, complete genome	Coronaviridae	Gammacoronavirus	Avian coronavirus		2014-06-01	China	27685	ssRNA(+)	FALSE	FALSE	Gallus gallus
KX364295.1	Coronaviridae_6	Infectious bronchitis virus strain ck/CH/LBJ/140511, complete genome	Coronaviridae	Gammacoronavirus	Avian coronavirus		2014-05-15	China	27688	ssRNA(+)	FALSE	FALSE	Gallus gallus
KX364296.1	Coronaviridae_6	Infectious bronchitis virus strain ck/CH/LJL/08-9, complete genome	Coronaviridae	Gammacoronavirus	Avian coronavirus		2008-06-01	China	27655	ssRNA(+)	FALSE	FALSE	Gallus gallus
KX364297.1	Coronaviridae_6	Infectious bronchitis virus strain ck/CH/LJL/131006, complete genome	Coronaviridae	Gammacoronavirus	Avian coronavirus		2013-10-15	China	27686	ssRNA(+)	FALSE	FALSE	Gallus gallus
KX364298.1	Coronaviridae_6	Infectious bronchitis virus strain ck/CH/LDL/05II, complete genome	Coronaviridae	Gammacoronavirus	Avian coronavirus		2005-06-01	China	27678	ssRNA(+)	FALSE	FALSE	Gallus gallus
KX364299.1	Coronaviridae_6	Infectious bronchitis virus strain ck/CH/LSD/101223, complete genome	Coronaviridae	Gammacoronavirus	Avian coronavirus		2010-06-01	China	27675	ssRNA(+)	FALSE	FALSE	Gallus gallus
KX364300.1	Coronaviridae_6	Infectious bronchitis virus strain ck/CH/LSD/111218, complete genome	Coronaviridae	Gammacoronavirus	Avian coronavirus		2011-06-01	China	27675	ssRNA(+)	FALSE	FALSE	Gallus gallus
KX372249.1	Coronaviridae_6	Infectious bronchitis virus strain ck/CH/LHLJ/121219, complete genome	Coronaviridae	Gammacoronavirus	Avian coronavirus		2012-06-01	China	27684	ssRNA(+)	FALSE	FALSE	Gallus gallus
KX372250.1	Coronaviridae_6	Infectious bronchitis virus strain ck/CH/LSD/130205, complete genome	Coronaviridae	Gammacoronavirus	Avian coronavirus		2013-06-01	China	27685	ssRNA(+)	FALSE	FALSE	Gallus gallus
KX375805.1	Coronaviridae_6	Infectious bronchitis virus strain ck/CH/LJS/07V, complete genome	Coronaviridae	Gammacoronavirus	Avian coronavirus		2007-06-01	China	27674	ssRNA(+)	FALSE	FALSE	Gallus gallus
KX375806.1	Coronaviridae_6	Infectious bronchitis virus strain ck/CH/LHLJ/110673, complete genome	Coronaviridae	Gammacoronavirus	Avian coronavirus		2011-06-01	China	27684	ssRNA(+)	FALSE	FALSE	Gallus gallus
KX375807.1	Coronaviridae_6	Infectious bronchitis virus strain ck/CH/LHLJ/110836, complete genome	Coronaviridae	Gammacoronavirus	Avian coronavirus		2011-06-01	China	27675	ssRNA(+)	FALSE	FALSE	Gallus gallus
KX375808.1	Coronaviridae_6	Infectious bronchitis virus strain ck/CH/LHLJ/99I, complete genome	Coronaviridae	Gammacoronavirus	Avian coronavirus		1999-06-01	China	27665	ssRNA(+)	FALSE	FALSE	Gallus gallus
KX389094.1	Coronaviridae_6	Infectious bronchitis virus strain ck/CH/LBJ/120481, complete genome	Coronaviridae	Gammacoronavirus	Avian coronavirus		2012-06-01	China	27681	ssRNA(+)	FALSE	FALSE	Gallus gallus
KX400753.1	Coronaviridae_6	Infectious bronchitis virus strain ck/CH/LHB/110123, complete genome	Coronaviridae	Gammacoronavirus	Avian coronavirus		2011-06-01	China	27676	ssRNA(+)	FALSE	FALSE	Gallus gallus
KX425847.1	Coronaviridae_6	Infectious bronchitis virus strain ck/CH/LJL/140734, complete genome	Coronaviridae	Gammacoronavirus	Avian coronavirus		2014-06-01	China	27709	ssRNA(+)	FALSE	FALSE	Gallus gallus
KX432213.1	Coronaviridae_4	Canine respiratory coronavirus strain BJ232, complete genome	Coronaviridae	Betacoronavirus	Betacoronavirus 1		2014-06-01	China	30868	ssRNA(+)	FALSE	FALSE	Canis lupus familiaris
KX434788.1	Coronaviridae_6	Infectious bronchitis virus strain ck/CH/LHLJ/130622, complete genome	Coronaviridae	Gammacoronavirus	Avian coronavirus		2013-06-01	China	27684	ssRNA(+)	FALSE	FALSE	Gallus gallus
KX434789.1	Coronaviridae_6	Infectious bronchitis virus strain ck/CH/LJL/140530, complete genome	Coronaviridae	Gammacoronavirus	Avian coronavirus		2014-06-01	China	27685	ssRNA(+)	FALSE	FALSE	Gallus gallus
KX434790.1	Coronaviridae_6	Infectious bronchitis virus strain ck/CH/LJS/111210, complete genome	Coronaviridae	Gammacoronavirus	Avian coronavirus		2011-06-01	China	27618	ssRNA(+)	FALSE	FALSE	Gallus gallus
KX442564.1	Coronaviridae_42	Hypsugo bat coronavirus HKU25 isolate YD131305, complete genome	Coronaviridae	Betacoronavirus	Hypsugo bat coronavirus HKU25	feces	2013-09-14	China	30498	ssRNA(+)	FALSE	FALSE	Hypsugo pulveratus
KX442565.1	Coronaviridae_42	Hypsugo bat coronavirus HKU25 isolate NL140462, complete genome	Coronaviridae	Betacoronavirus	Hypsugo bat coronavirus HKU25	feces	2014-05-08	China	30497	ssRNA(+)	FALSE	FALSE	Hypsugo pulveratus
KX443143.2	Coronaviridae_18	Porcine deltacoronavirus strain CH-01, complete genome	Coronaviridae	Deltacoronavirus	Coronavirus HKU15		2016-06-01	China	25404	ssRNA(+)	FALSE	FALSE
KX499468.1	Coronaviridae_5	Transmissible gastroenteritis virus strain TGEV AHHF, complete genome	Coronaviridae	Alphacoronavirus	Alphacoronavirus 1		2015-12-22	China	28614	ssRNA(+)	FALSE	FALSE	Sus scrofa
KX512809.1	Coronaviridae_39	Ferret enteric coronavirus strain FECV1, complete genome	Coronaviridae	Alphacoronavirus	Ferret coronavirus		2015-06-01	USA	28151	ssRNA(+)	FALSE	FALSE	Mustela putorius furo
KX512810.1	Coronaviridae_39	Ferret systemic coronavirus strain FSCV6, complete genome	Coronaviridae	Alphacoronavirus	Ferret coronavirus		2015-06-01	USA	27987	ssRNA(+)	FALSE	FALSE	Mustela putorius furo
KX534205.1	Coronaviridae_17	Porcine epidemic diarrhea virus isolate JSLS-1/2015, complete genome	Coronaviridae	Alphacoronavirus	Porcine epidemic diarrhea virus		2015-01-25	China	27861	ssRNA(+)	FALSE	FALSE	Sus scrofa
KX534206.1	Coronaviridae_17	Porcine epidemic diarrhea virus isolate JS-2/2015, complete genome	Coronaviridae	Alphacoronavirus	Porcine epidemic diarrhea virus		2015-01-05	China	27930	ssRNA(+)	FALSE	FALSE	Sus scrofa
KX538964.1	Coronaviridae_4	Human coronavirus OC43 isolate MY-U002/12, complete genome	Coronaviridae	Betacoronavirus	Betacoronavirus 1	oronasopharynx	2012-02-22	Malaysia	30713	ssRNA(+)	FALSE	FALSE	Homo sapiens
KX538965.1	Coronaviridae_4	Human coronavirus OC43 isolate MY-U208/12, complete genome	Coronaviridae	Betacoronavirus	Betacoronavirus 1	oronasopharynx	2012-03-28	Malaysia	30716	ssRNA(+)	FALSE	FALSE	Homo sapiens
KX538966.1	Coronaviridae_4	Human coronavirus OC43 isolate MY-U236/12, complete genome	Coronaviridae	Betacoronavirus	Betacoronavirus 1	oronasopharynx	2012-04-02	Malaysia	30713	ssRNA(+)	FALSE	FALSE	Homo sapiens
KX538967.1	Coronaviridae_4	Human coronavirus OC43 isolate MY-U413/12, complete genome	Coronaviridae	Betacoronavirus	Betacoronavirus 1	oronasopharynx	2012-05-02	Malaysia	30716	ssRNA(+)	FALSE	FALSE	Homo sapiens
KX538968.1	Coronaviridae_4	Human coronavirus OC43 isolate MY-U464/12, complete genome	Coronaviridae	Betacoronavirus	Betacoronavirus 1	oronasopharynx	2012-05-09	Malaysia	30716	ssRNA(+)	FALSE	FALSE	Homo sapiens
KX538969.1	Coronaviridae_4	Human coronavirus OC43 isolate MY-U523/12, complete genome	Coronaviridae	Betacoronavirus	Betacoronavirus 1	oronasopharynx	2012-05-18	Malaysia	30716	ssRNA(+)	FALSE	FALSE	Homo sapiens
KX538970.1	Coronaviridae_4	Human coronavirus OC43 isolate MY-U710/12, complete genome	Coronaviridae	Betacoronavirus	Betacoronavirus 1	oronasopharynx	2012-06-20	Malaysia	30713	ssRNA(+)	FALSE	FALSE	Homo sapiens
KX538971.1	Coronaviridae_4	Human coronavirus OC43 isolate MY-U732/12, complete genome	Coronaviridae	Betacoronavirus	Betacoronavirus 1	oronasopharynx	2012-06-25	Malaysia	30716	ssRNA(+)	FALSE	FALSE	Homo sapiens
KX538972.1	Coronaviridae_4	Human coronavirus OC43 isolate MY-U774/12, complete genome	Coronaviridae	Betacoronavirus	Betacoronavirus 1	oronasopharynx	2012-07-04	Malaysia	30713	ssRNA(+)	FALSE	FALSE	Homo sapiens
KX538973.1	Coronaviridae_4	Human coronavirus OC43 isolate MY-U868/12, complete genome	Coronaviridae	Betacoronavirus	Betacoronavirus 1	oronasopharynx	2012-07-16	Malaysia	30716	ssRNA(+)	FALSE	FALSE	Homo sapiens
KX538974.1	Coronaviridae_4	Human coronavirus OC43 isolate MY-U945/12, complete genome	Coronaviridae	Betacoronavirus	Betacoronavirus 1	oronasopharynx	2012-08-01	Malaysia	30716	ssRNA(+)	FALSE	FALSE	Homo sapiens
KX538975.1	Coronaviridae_4	Human coronavirus OC43 isolate MY-U1024/12, complete genome	Coronaviridae	Betacoronavirus	Betacoronavirus 1	oronasopharynx	2012-08-24	Malaysia	30716	ssRNA(+)	FALSE	FALSE	Homo sapiens
KX538976.1	Coronaviridae_4	Human coronavirus OC43 isolate MY-U1057/12, complete genome	Coronaviridae	Betacoronavirus	Betacoronavirus 1	oronasopharynx	2012-08-27	Malaysia	30713	ssRNA(+)	FALSE	FALSE	Homo sapiens
KX538977.1	Coronaviridae_4	Human coronavirus OC43 isolate MY-U1140/12, complete genome	Coronaviridae	Betacoronavirus	Betacoronavirus 1	oronasopharynx	2012-09-10	Malaysia	30716	ssRNA(+)	FALSE	FALSE	Homo sapiens
KX538978.1	Coronaviridae_4	Human coronavirus OC43 isolate MY-U1758/13, complete genome	Coronaviridae	Betacoronavirus	Betacoronavirus 1	oronasopharynx	2013-01-02	Malaysia	30713	ssRNA(+)	FALSE	FALSE	Homo sapiens
KX538979.1	Coronaviridae_4	Human coronavirus OC43 isolate MY-U1975/13, complete genome	Coronaviridae	Betacoronavirus	Betacoronavirus 1	oronasopharynx	2013-02-15	Malaysia	30713	ssRNA(+)	FALSE	FALSE	Homo sapiens
KX550281.1	Coronaviridae_17	Porcine epidemic diarrhea virus strain ZJ15XS0101 P1, complete genome	Coronaviridae	Alphacoronavirus	Porcine epidemic diarrhea virus	abdominal cavity	2015-01-16	China	28067	ssRNA(+)	FALSE	FALSE	Sus scrofa
KX574227.1	Coronaviridae_26	Bat coronavirus isolate PREDICT/PDF-2180, complete genome	Coronaviridae		Bat coronavirus	feces	2013-02-20	Uganda	29642	ssRNA(+)	FALSE	FALSE	Pipistrellus
KX580953.1	Coronaviridae_17	Porcine epidemic diarrhea virus strain KB2013-4, complete genome	Coronaviridae	Alphacoronavirus	Porcine epidemic diarrhea virus	feces	2013-06-01	China	28038	ssRNA(+)	FALSE	FALSE	Sus scrofa
KX580958.1	Coronaviridae_17	Porcine epidemic diarrhea virus strain PC22A-P140.BI, complete genome	Coronaviridae	Alphacoronavirus	Porcine epidemic diarrhea virus		2016-07-07	USA	27980	ssRNA(+)	FALSE	FALSE
KX640829.1	Coronaviridae_6	Infectious bronchitis virus strain ck/CH/LGX/111119, complete genome	Coronaviridae	Gammacoronavirus	Avian coronavirus		2011-06-01	China	27679	ssRNA(+)	FALSE	FALSE	Gallus gallus
KX683006.1	Coronaviridae_17	Porcine epidemic diarrhea virus strain PC22A, complete genome	Coronaviridae	Alphacoronavirus	Porcine epidemic diarrhea virus		2013-06-01		28038	ssRNA(+)	FALSE	FALSE
KX722529.1	Coronaviridae_10	Feline coronavirus isolate UG-FH8, complete genome	Coronaviridae	Alphacoronavirus	Alphacoronavirus 1		2015-01-01	Belgium	29174	ssRNA(+)	FALSE	FALSE	Felis catus
KX722530.1	Coronaviridae_10	Feline coronavirus isolate Cat 1 Karlslunde, complete genome	Coronaviridae	Alphacoronavirus	Alphacoronavirus 1	lung	2015-02-01	Denmark	28595	ssRNA(+)	FALSE	FALSE	Felis catus
KX722531.1	Coronaviridae_10	Feline coronavirus isolate Cat 2 Holstebro, complete genome	Coronaviridae	Alphacoronavirus	Alphacoronavirus 1		2015-02-01	Denmark	29042	ssRNA(+)	FALSE	FALSE	Felis catus
KX791060.1	Coronaviridae_17	Porcine epidemic diarrhea virus isolate CHSD2014, complete genome	Coronaviridae	Alphacoronavirus	Porcine epidemic diarrhea virus		2014-05-12	China	28035	ssRNA(+)	FALSE	FALSE	Sus scrofa
KX812523.1	Coronaviridae_17	Porcine epidemic diarrhea virus isolate XM1-2, complete genome	Coronaviridae	Alphacoronavirus	Porcine epidemic diarrhea virus		2016-03-30	China	28038	ssRNA(+)	FALSE	FALSE	Sus scrofa
KX812524.1	Coronaviridae_17	Porcine epidemic diarrhea virus isolate XM2-4, complete genome	Coronaviridae	Alphacoronavirus	Porcine epidemic diarrhea virus		2016-08-01	China	28038	ssRNA(+)	FALSE	FALSE	Sus scrofa
KX834351.1	Coronaviridae_18	Porcine deltacoronavirus strain PDCoV/Swine/Vietnam/HaNoi6/2015, complete genome	Coronaviridae	Deltacoronavirus	Coronavirus HKU15	feces	2015-10-10	Viet Nam	25406	ssRNA(+)	FALSE	FALSE	Sus scrofa
KX834352.1	Coronaviridae_18	Porcine deltacoronavirus strain PDCoV/Swine/Vietnam/Binh21/2015, complete genome	Coronaviridae	Deltacoronavirus	Coronavirus HKU15	feces	2015-12-08	Viet Nam	25406	ssRNA(+)	FALSE	FALSE	Sus scrofa
KX839246.1	Coronaviridae_17	Porcine epidemic diarrhea virus strain 85-7, complete genome	Coronaviridae	Alphacoronavirus	Porcine epidemic diarrhea virus	abdominal cavity	2013-05-15	China	28015	ssRNA(+)	FALSE	FALSE	Sus scrofa
KX839247.1	Coronaviridae_17	Porcine epidemic diarrhea virus strain 85-7-mutant1, complete genome	Coronaviridae	Alphacoronavirus	Porcine epidemic diarrhea virus		2015-09-15	China	27988	ssRNA(+)	FALSE	FALSE
KX839248.1	Coronaviridae_17	Porcine epidemic diarrhea virus strain 85-7-mutant2, complete genome	Coronaviridae	Alphacoronavirus	Porcine epidemic diarrhea virus		2015-09-15	China	27533	ssRNA(+)	FALSE	FALSE
KX839249.1	Coronaviridae_17	Porcine epidemic diarrhea virus strain 85-7-mutant3, complete genome	Coronaviridae	Alphacoronavirus	Porcine epidemic diarrhea virus		2015-09-15	China	28000	ssRNA(+)	FALSE	FALSE
KX839250.1	Coronaviridae_17	Porcine epidemic diarrhea virus strain 85-7-mutant4, complete genome	Coronaviridae	Alphacoronavirus	Porcine epidemic diarrhea virus		2015-09-15	China	27860	ssRNA(+)	FALSE	FALSE
KX839251.1	Coronaviridae_17	Porcine epidemic diarrhea virus strain 85-7-mutant5, complete genome	Coronaviridae	Alphacoronavirus	Porcine epidemic diarrhea virus		2015-09-15	China	27990	ssRNA(+)	FALSE	FALSE
KX900393.1	Coronaviridae_5	Transmissible gastroenteritis virus strain TGEV/USA/Z/1986, complete genome	Coronaviridae	Alphacoronavirus	Alphacoronavirus 1	feces, abdominal cavity	2006-12-08	USA	28582	ssRNA(+)	FALSE	FALSE
KX900394.1	Coronaviridae_5	Transmissible gastroenteritis virus strain TGEV/USA/HB/1988, complete genome	Coronaviridae	Alphacoronavirus	Alphacoronavirus 1	feces, abdominal cavity	1988-06-01	USA	28582	ssRNA(+)	FALSE	FALSE
KX900395.1	Coronaviridae_5	Transmissible gastroenteritis virus strain TGEV/USA/Minnesota138/2006, complete genome	Coronaviridae	Alphacoronavirus	Alphacoronavirus 1	feces, abdominal cavity	2006-11-08	USA	28521	ssRNA(+)	FALSE	FALSE
KX900396.1	Coronaviridae_5	Transmissible gastroenteritis virus strain TGEV/USA/Illinois139/2006, complete genome	Coronaviridae	Alphacoronavirus	Alphacoronavirus 1	feces, abdominal cavity	2006-11-17	USA	28393	ssRNA(+)	FALSE	FALSE
KX900397.1	Coronaviridae_5	Transmissible gastroenteritis virus strain TGEV/USA/NorthCarolina140/2007, complete genome	Coronaviridae	Alphacoronavirus	Alphacoronavirus 1	feces, abdominal cavity	2007-02-08	USA	28521	ssRNA(+)	FALSE	FALSE
KX900398.1	Coronaviridae_5	Transmissible gastroenteritis virus strain TGEV/USA/Minnesota141/2007, complete genome	Coronaviridae	Alphacoronavirus	Alphacoronavirus 1	feces, abdominal cavity	2007-02-08	USA	28521	ssRNA(+)	FALSE	FALSE
KX900399.1	Coronaviridae_5	Transmissible gastroenteritis virus strain TGEV/USA/NorthCarolina142/2007, complete genome	Coronaviridae	Alphacoronavirus	Alphacoronavirus 1	feces, abdominal cavity	2007-02-16	USA	28521	ssRNA(+)	FALSE	FALSE
KX900400.1	Coronaviridae_5	Transmissible gastroenteritis virus strain TGEV/USA/Iowa143/2008, complete genome	Coronaviridae	Alphacoronavirus	Alphacoronavirus 1	feces, abdominal cavity	2008-03-06	USA	28521	ssRNA(+)	FALSE	FALSE
KX900401.1	Coronaviridae_5	Transmissible gastroenteritis virus strain TGEV/USA/Tennessee144/2008, complete genome	Coronaviridae	Alphacoronavirus	Alphacoronavirus 1	feces, abdominal cavity	2008-04-15	USA	28521	ssRNA(+)	FALSE	FALSE
KX900403.1	Coronaviridae_5	Transmissible gastroenteritis virus strain TGEV/USA/Illinois146/2008, complete genome	Coronaviridae	Alphacoronavirus	Alphacoronavirus 1	feces, abdominal cavity	2008-04-09	USA	28521	ssRNA(+)	FALSE	FALSE
KX964649.1	Coronaviridae_43	Coronavirus AcCoV-JC34, complete genome	Coronaviridae	Alphacoronavirus	Coronavirus AcCoV-JC34		2011-10-15	China	27682	ssRNA(+)	FALSE	FALSE	Apodemus chevrieri
KX981440.1	Coronaviridae_17	Porcine epidemic diarrhea virus isolate CH/HNZZ47/2016, complete genome	Coronaviridae	Alphacoronavirus	Porcine epidemic diarrhea virus	feces	2016-05-15	China	28124	ssRNA(+)	FALSE	FALSE	Sus scrofa
KX982264.1	Coronaviridae_4	Bovine coronavirus isolate BCoV_2014_13, complete genome	Coronaviridae	Betacoronavirus	Betacoronavirus 1	feces	2014-03-04	France	30847	ssRNA(+)	FALSE	FALSE	Bos taurus
KX998969.1	Coronaviridae_18	Porcine deltacoronavirus isolate P29_15_VN_1215, complete genome	Coronaviridae	Deltacoronavirus	Coronavirus HKU15		2015-12-15	Viet Nam	25415	ssRNA(+)	FALSE	FALSE	Sus scrofa
KY007139.1	Coronaviridae_17	Porcine epidemic diarrhea virus isolate PEDV-Hjms, complete genome	Coronaviridae	Alphacoronavirus	Porcine epidemic diarrhea virus		2015-05-11	China	28017	ssRNA(+)	FALSE	FALSE	Sus scrofa
KY007140.1	Coronaviridae_17	Porcine epidemic diarrhea virus isolate PEDV-LNsy, complete genome	Coronaviridae	Alphacoronavirus	Porcine epidemic diarrhea virus		2015-03-02	China	28050	ssRNA(+)	FALSE	FALSE	Sus scrofa
KY014281.1	Coronaviridae_4	Human coronavirus OC43 isolate 2002-04, complete genome	Coronaviridae	Betacoronavirus	Betacoronavirus 1		2002-06-01	France	30602	ssRNA(+)	FALSE	FALSE	Homo sapiens
KY014282.1	Coronaviridae_4	Human coronavirus OC43 isolate 2007-09, complete genome	Coronaviridae	Betacoronavirus	Betacoronavirus 1		2007-06-01	France	30659	ssRNA(+)	FALSE	FALSE	Homo sapiens
KY019623.1	Coronaviridae_17	Porcine epidemic diarrhea virus isolate SLOreBAS-1/2015, complete genome	Coronaviridae	Alphacoronavirus	Porcine epidemic diarrhea virus		2015-11-03	Slovenia	28021	ssRNA(+)	FALSE	FALSE	Sus scrofa
KY019624.1	Coronaviridae_17	Porcine epidemic diarrhea virus isolate SLOreBAS-2/2015, complete genome	Coronaviridae	Alphacoronavirus	Porcine epidemic diarrhea virus		2015-11-03	Slovenia	28021	ssRNA(+)	FALSE	FALSE	Sus scrofa
KY047602.1	Coronaviridae_6	Infectious bronchitis virus isolate gammaCoV/Ck/Poland/G052/2016, complete genome	Coronaviridae	Gammacoronavirus	Avian coronavirus		2016-02-15	Poland	27595	ssRNA(+)	FALSE	FALSE	Gallus gallus
KY063616.1	Coronaviridae_5	Canine coronavirus isolate HLJ-071, complete genome	Coronaviridae	Alphacoronavirus	Alphacoronavirus 1	feces	2016-07-01	China	29319	ssRNA(+)	FALSE	FALSE	Canis lupus familiaris
KY063617.1	Coronaviridae_5	Canine coronavirus isolate HLJ-072, complete genome	Coronaviridae	Alphacoronavirus	Alphacoronavirus 1	feces	2016-07-01	China	29264	ssRNA(+)	FALSE	FALSE	Canis lupus familiaris
KY063618.2	Coronaviridae_5	Canine coronavirus isolate HLJ-073, complete genome	Coronaviridae	Alphacoronavirus	Alphacoronavirus 1	feces	2016-07-01	China	28969	ssRNA(+)	FALSE	FALSE	Canis lupus familiaris
KY065120.1	Coronaviridae_18	Porcine deltacoronavirus strain CHN/Tianjin/2016, complete genome	Coronaviridae	Deltacoronavirus	Coronavirus HKU15	feces	2016-06-01	China	25413	ssRNA(+)	FALSE	FALSE	Sus scrofa
KY070587.1	Coronaviridae_17	Porcine epidemic diarrhea virus isolate JSCZ1601, complete genome	Coronaviridae	Alphacoronavirus	Porcine epidemic diarrhea virus	abdominal cavity	2016-06-01	China	28045	ssRNA(+)	FALSE	FALSE	Sus scrofa
KY073744.1	Coronaviridae_44	NL63-related bat coronavirus strain BtKYNL63-9a, complete genome	Coronaviridae	Alphacoronavirus	NL63-related bat coronavirus strain BtKYNL63-9b	feces	2010-06-21	Kenya	28363	ssRNA(+)	FALSE	FALSE	Triaenops afer
KY073745.1	Coronaviridae_45	NL63-related bat coronavirus strain BtKYNL63-9b, complete genome	Coronaviridae	Alphacoronavirus	NL63-related bat coronavirus strain BtKYNL63-9b	feces	2010-06-21	Kenya	28679	ssRNA(+)	FALSE	FALSE	Triaenops afer
KY073746.1	Coronaviridae_45	NL63-related bat coronavirus strain BtKYNL63-15, complete genome	Coronaviridae	Alphacoronavirus	NL63-related bat coronavirus strain BtKYNL63-9b	feces	2008-08-06	Kenya	28442	ssRNA(+)	FALSE	FALSE	Triaenops afer
KY073747.1	Coronaviridae_2	229E-related bat coronavirus strain BtKY229E-1, complete genome	Coronaviridae	Alphacoronavirus	Human coronavirus 229E	feces	2009-06-20	Kenya	27837	ssRNA(+)	FALSE	FALSE	Hipposideros
KY073748.1	Coronaviridae_2	229E-related bat coronavirus strain BtKY229E-8, complete genome	Coronaviridae	Alphacoronavirus	Human coronavirus 229E	feces	2010-06-15	Kenya	27636	ssRNA(+)	FALSE	FALSE	Macronycteris vittatus
KY111278.1	Coronaviridae_17	Porcine epidemic diarrhea virus strain PEDV 1842/2016 ITA, complete genome	Coronaviridae	Alphacoronavirus	Porcine epidemic diarrhea virus	feces	2016-01-28	Italy	28041	ssRNA(+)	FALSE	FALSE	Sus scrofa
KY292377.1	Coronaviridae_10	Feline coronavirus strain HLJ/DQ/2016/01, complete genome	Coronaviridae	Alphacoronavirus	Alphacoronavirus 1	abdominal cavity	2016-10-15	China	29303	ssRNA(+)	FALSE	FALSE	Felis catus
KY293677.1	Coronaviridae_18	Porcine deltacoronavirus isolate CH/JXJGS01/2016, complete genome	Coronaviridae	Deltacoronavirus	Coronavirus HKU15		2016-05-23	China	25438	ssRNA(+)	FALSE	FALSE	Sus scrofa
KY293678.1	Coronaviridae_18	Porcine deltacoronavirus isolate CH/JXJGS02/2016, complete genome	Coronaviridae	Deltacoronavirus	Coronavirus HKU15		2016-05-23	China	25438	ssRNA(+)	FALSE	FALSE	Sus scrofa
KY352407.1	Coronaviridae_46	Severe acute respiratory syndrome-related coronavirus strain BtKY72, complete genome	Coronaviridae	Betacoronavirus	Severe acute respiratory syndrome-related coronavirus	feces	2007-08-15	Kenya	29274	ssRNA(+)	FALSE	FALSE	Rhinolophus
KY354363.1	Coronaviridae_18	Porcine deltacoronavirus isolate DH1, complete genome	Coronaviridae	Deltacoronavirus	Coronavirus HKU15		2016-04-01	South Korea	25422	ssRNA(+)	FALSE	FALSE	Sus scrofa
KY354364.1	Coronaviridae_18	Porcine deltacoronavirus isolate DH2, complete genome	Coronaviridae	Deltacoronavirus	Coronavirus HKU15		2016-04-01	South Korea	25422	ssRNA(+)	FALSE	FALSE	Sus scrofa
KY363867.1	Coronaviridae_18	Porcine deltacoronavirus isolate CHN-GD16-03, complete genome	Coronaviridae	Deltacoronavirus	Coronavirus HKU15		2016-03-18	China	25396	ssRNA(+)	FALSE	FALSE	Sus scrofa
KY363868.1	Coronaviridae_18	Porcine deltacoronavirus isolate CHN-GD16-05, complete genome	Coronaviridae	Deltacoronavirus	Coronavirus HKU15		2016-01-05	China	25403	ssRNA(+)	FALSE	FALSE	Sus scrofa
KY364365.1	Coronaviridae_18	Porcine deltacoronavirus isolate KNU16-07, complete genome	Coronaviridae	Deltacoronavirus	Coronavirus HKU15	feces	2014-07-15	South Korea	25422	ssRNA(+)	FALSE	FALSE	Sus scrofa
KY406735.1	Coronaviridae_5	Porcine respiratory coronavirus strain PRCV/USA/Minnesota-46140/2016, complete genome	Coronaviridae	Alphacoronavirus	Alphacoronavirus 1	oronasopharynx	2016-11-01	USA	27779	ssRNA(+)	FALSE	FALSE
KY407556.1	Coronaviridae_6	Infectious bronchitis virus strain gammaCoV/ck/China/I0114/14, complete genome	Coronaviridae	Gammacoronavirus	Avian coronavirus		2014-06-01	China	27681	ssRNA(+)	FALSE	FALSE	Gallus gallus
KY407557.1	Coronaviridae_6	Infectious bronchitis virus strain gammaCoV/ck/China/I0111/14, complete genome	Coronaviridae	Gammacoronavirus	Avian coronavirus		2014-06-01	China	27677	ssRNA(+)	FALSE	FALSE	Gallus gallus
KY407558.1	Coronaviridae_6	Infectious bronchitis virus strain gammaCoV/ck/China/I0118/14, complete genome	Coronaviridae	Gammacoronavirus	Avian coronavirus		2014-06-01	China	27680	ssRNA(+)	FALSE	FALSE	Gallus gallus
KY417142.1	Coronaviridae_3	Bat SARS-like coronavirus isolate As6526, complete genome	Coronaviridae	Betacoronavirus	Severe acute respiratory syndrome-related coronavirus		2014-05-12	China	29725	ssRNA(+)	FALSE	FALSE	Aselliscus stoliczkanus
KY417143.1	Coronaviridae_3	Bat SARS-like coronavirus isolate Rs4081, complete genome	Coronaviridae	Betacoronavirus	Severe acute respiratory syndrome-related coronavirus		2012-09-18	China	29741	ssRNA(+)	FALSE	FALSE	Rhinolophus sinicus
KY417144.1	Coronaviridae_3	Bat SARS-like coronavirus isolate Rs4084, complete genome	Coronaviridae	Betacoronavirus	Severe acute respiratory syndrome-related coronavirus		2012-09-18	China	29770	ssRNA(+)	FALSE	FALSE	Rhinolophus sinicus
KY417145.1	Coronaviridae_3	Bat SARS-like coronavirus isolate Rf4092, complete genome	Coronaviridae	Betacoronavirus	Severe acute respiratory syndrome-related coronavirus		2012-09-18	China	29710	ssRNA(+)	FALSE	FALSE	Rhinolophus ferrumequinum
KY417146.1	Coronaviridae_3	Bat SARS-like coronavirus isolate Rs4231, complete genome	Coronaviridae	Betacoronavirus	Severe acute respiratory syndrome-related coronavirus		2013-04-17	China	29782	ssRNA(+)	FALSE	FALSE	Rhinolophus sinicus
KY417147.1	Coronaviridae_3	Bat SARS-like coronavirus isolate Rs4237, complete genome	Coronaviridae	Betacoronavirus	Severe acute respiratory syndrome-related coronavirus		2013-04-17	China	29741	ssRNA(+)	FALSE	FALSE	Rhinolophus sinicus
KY417148.1	Coronaviridae_3	Bat SARS-like coronavirus isolate Rs4247, complete genome	Coronaviridae	Betacoronavirus	Severe acute respiratory syndrome-related coronavirus		2013-04-17	China	29743	ssRNA(+)	FALSE	FALSE	Rhinolophus sinicus
KY417149.1	Coronaviridae_3	Bat SARS-like coronavirus isolate Rs4255, complete genome	Coronaviridae	Betacoronavirus	Severe acute respiratory syndrome-related coronavirus		2013-04-17	China	29743	ssRNA(+)	FALSE	FALSE	Rhinolophus sinicus
KY417150.1	Coronaviridae_3	Bat SARS-like coronavirus isolate Rs4874, complete genome	Coronaviridae	Betacoronavirus	Severe acute respiratory syndrome-related coronavirus		2013-07-21	China	30311	ssRNA(+)	FALSE	FALSE	Rhinolophus sinicus
KY417151.1	Coronaviridae_3	Bat SARS-like coronavirus isolate Rs7327, complete genome	Coronaviridae	Betacoronavirus	Severe acute respiratory syndrome-related coronavirus		2014-10-24	China	30307	ssRNA(+)	FALSE	FALSE	Rhinolophus sinicus
KY417152.1	Coronaviridae_3	Bat SARS-like coronavirus isolate Rs9401, complete genome	Coronaviridae	Betacoronavirus	Severe acute respiratory syndrome-related coronavirus		2015-10-16	China	29769	ssRNA(+)	FALSE	FALSE	Rhinolophus sinicus
KY419103.1	Coronaviridae_4	Porcine hemagglutinating encephalomyelitis virus strain PHEV-CoV/swine/USA/15TOSU25049/2015, complete genome	Coronaviridae	Betacoronavirus	Betacoronavirus 1	oronasopharynx	2015-09-15	USA	30632	ssRNA(+)	FALSE	FALSE	Sus scrofa scrofa
KY419104.1	Coronaviridae_4	Porcine hemagglutinating encephalomyelitis virus strain PHEV-CoV/swine/USA/15TOSU0331/2015, complete genome	Coronaviridae	Betacoronavirus	Betacoronavirus 1	oronasopharynx	2015-08-15	USA	30530	ssRNA(+)	FALSE	FALSE	Sus scrofa scrofa
KY419105.1	Coronaviridae_4	Porcine hemagglutinating encephalomyelitis virus strain PHEV-CoV/swine/USA/15TOSU0582/2015, complete genome	Coronaviridae	Betacoronavirus	Betacoronavirus 1	oronasopharynx	2015-08-20	USA	30513	ssRNA(+)	FALSE	FALSE	Sus scrofa scrofa
KY419106.1	Coronaviridae_4	Porcine hemagglutinating encephalomyelitis virus strain PHEV-CoV/swine/USA/15TOSU1785/2015, complete genome	Coronaviridae	Betacoronavirus	Betacoronavirus 1	oronasopharynx	2015-08-15	USA	29866	ssRNA(+)	FALSE	FALSE	Sus scrofa scrofa
KY419107.1	Coronaviridae_4	Porcine hemagglutinating encephalomyelitis virus strain PHEV-CoV/swine/USA/15TOSU1209/2015, complete genome	Coronaviridae	Betacoronavirus	Betacoronavirus 1	oronasopharynx	2015-07-25	USA	29866	ssRNA(+)	FALSE	FALSE	Sus scrofa scrofa
KY419109.1	Coronaviridae_4	Porcine hemagglutinating encephalomyelitis virus strain PHEV-CoV/swine/USA/15TOSU1655/2015, complete genome	Coronaviridae	Betacoronavirus	Betacoronavirus 1	oronasopharynx	2015-08-01	USA	29906	ssRNA(+)	FALSE	FALSE	Sus scrofa scrofa
KY419110.1	Coronaviridae_4	Porcine hemagglutinating encephalomyelitis virus strain PHEV-CoV/swine/USA/15TOSU1582/2015, complete genome	Coronaviridae	Betacoronavirus	Betacoronavirus 1	oronasopharynx	2015-08-12	USA	30515	ssRNA(+)	FALSE	FALSE	Sus scrofa scrofa
KY419111.1	Coronaviridae_4	Porcine hemagglutinating encephalomyelitis virus strain PHEV-CoV/swine/USA/15TOSU1727/2015, complete genome	Coronaviridae	Betacoronavirus	Betacoronavirus 1	oronasopharynx	2015-08-08	USA	29866	ssRNA(+)	FALSE	FALSE	Sus scrofa scrofa
KY419112.1	Coronaviridae_4	Porcine hemagglutinating encephalomyelitis virus strain PHEV-CoV/swine/USA/15TOSU1765/2015, complete genome	Coronaviridae	Betacoronavirus	Betacoronavirus 1	oronasopharynx	2015-08-01	USA	30531	ssRNA(+)	FALSE	FALSE	Sus scrofa scrofa
KY419113.1	Coronaviridae_4	Porcine hemagglutinating encephalomyelitis virus strain PHEV CoV USA-15TOSU1582, complete genome	Coronaviridae	Betacoronavirus	Betacoronavirus 1	oronasopharynx	2015-07-25	USA	29900	ssRNA(+)	FALSE	FALSE	Sus scrofa scrofa
KY421672.1	Coronaviridae_6	Infectious bronchitis virus isolate SZ, complete genome	Coronaviridae	Gammacoronavirus	Avian coronavirus		2012-06-01	China	27679	ssRNA(+)	FALSE	FALSE	Gallus gallus
KY421673.1	Coronaviridae_6	Infectious bronchitis virus isolate SD, complete genome	Coronaviridae	Gammacoronavirus	Avian coronavirus		2013-06-01	China	27678	ssRNA(+)	FALSE	FALSE	Gallus gallus
KY486713.1	Coronaviridae_17	Porcine epidemic diarrhea virus strain 85-7-A40, complete genome	Coronaviridae	Alphacoronavirus	Porcine epidemic diarrhea virus		2015-09-15	China	27988	ssRNA(+)	FALSE	FALSE
KY486714.1	Coronaviridae_17	Porcine epidemic diarrhea virus strain 85-7-C40, complete genome	Coronaviridae	Alphacoronavirus	Porcine epidemic diarrhea virus		2015-09-15	China	28000	ssRNA(+)	FALSE	FALSE
KY513724.1	Coronaviridae_18	Porcine deltacoronavirus strain CH/Hunan/2014, complete genome	Coronaviridae	Deltacoronavirus	Coronavirus HKU15	feces	2014-06-01	China	25413	ssRNA(+)	FALSE	FALSE	Sus scrofa
KY513725.1	Coronaviridae_18	Porcine deltacoronavirus strain CH/Jiangsu/2014, complete genome	Coronaviridae	Deltacoronavirus	Coronavirus HKU15	feces	2014-06-01	China	25422	ssRNA(+)	FALSE	FALSE	Sus scrofa
KY554967.1	Coronaviridae_24	Human coronavirus NL63 strain N06-1144B, complete genome	Coronaviridae	Alphacoronavirus	Human coronavirus NL63		2016-06-01	USA	27523	ssRNA(+)	FALSE	FALSE	Homo sapiens
KY554972.1	Coronaviridae_4	Human coronavirus OC43 strain N07-1541B_433X, complete genome	Coronaviridae	Betacoronavirus	Betacoronavirus 1		2016-06-01	USA	30710	ssRNA(+)	FALSE	FALSE	Homo sapiens
KY566209.1	Coronaviridae_10	Feline coronavirus strain HLJ/HRB/2016/10, complete genome	Coronaviridae	Alphacoronavirus	Alphacoronavirus 1	abdominal cavity	2016-11-15	China	29440	ssRNA(+)	FALSE	FALSE	Felis catus
KY566210.1	Coronaviridae_10	Feline coronavirus strain HLJ/HRB/2016/11, complete genome	Coronaviridae	Alphacoronavirus	Alphacoronavirus 1	abdominal cavity	2016-11-15	China	29297	ssRNA(+)	FALSE	FALSE	Felis catus
KY566211.1	Coronaviridae_10	Feline coronavirus strain HLJ/HRB/2016/13, complete genome	Coronaviridae	Alphacoronavirus	Alphacoronavirus 1	abdominal cavity	2016-11-15	China	29337	ssRNA(+)	FALSE	FALSE	Felis catus
KY581684.1	Coronaviridae_26	Middle East respiratory syndrome-related coronavirus strain Hu/UAE_002_2013, complete genome	Coronaviridae	Betacoronavirus	Middle East respiratory syndrome-related coronavirus	lung, oronasopharynx	2013-07-10	United Arab Emirates	30123	ssRNA(+)	FALSE	FALSE	Homo sapiens
KY581685.1	Coronaviridae_26	Middle East respiratory syndrome-related coronavirus strain Hu/UAE_004_2013, complete genome	Coronaviridae	Betacoronavirus	Middle East respiratory syndrome-related coronavirus	lung, oronasopharynx	2013-07-12	United Arab Emirates	30123	ssRNA(+)	FALSE	FALSE	Homo sapiens
KY581686.1	Coronaviridae_26	Middle East respiratory syndrome-related coronavirus strain Hu/UAE_009_2014, complete genome	Coronaviridae	Betacoronavirus	Middle East respiratory syndrome-related coronavirus	lung, oronasopharynx	2014-04-10	United Arab Emirates	30123	ssRNA(+)	FALSE	FALSE	Homo sapiens
KY581687.1	Coronaviridae_26	Middle East respiratory syndrome-related coronavirus strain Hu/UAE_011_2013, complete genome	Coronaviridae	Betacoronavirus	Middle East respiratory syndrome-related coronavirus	lung, oronasopharynx	2013-12-23	United Arab Emirates	30123	ssRNA(+)	FALSE	FALSE	Homo sapiens
KY581690.1	Coronaviridae_26	Middle East respiratory syndrome-related coronavirus strain Hu/UAE_017_2014, complete genome	Coronaviridae	Betacoronavirus	Middle East respiratory syndrome-related coronavirus	lung, oronasopharynx	2014-04-12	United Arab Emirates	30123	ssRNA(+)	FALSE	FALSE	Homo sapiens
KY581691.1	Coronaviridae_26	Middle East respiratory syndrome-related coronavirus strain Hu/UAE_023_2014, complete genome	Coronaviridae	Betacoronavirus	Middle East respiratory syndrome-related coronavirus	lung, oronasopharynx	2014-04-14	United Arab Emirates	30123	ssRNA(+)	FALSE	FALSE	Homo sapiens
KY581692.1	Coronaviridae_26	Middle East respiratory syndrome-related coronavirus strain Hu/UAE_025_2014, complete genome	Coronaviridae	Betacoronavirus	Middle East respiratory syndrome-related coronavirus	lung, oronasopharynx	2014-04-15	United Arab Emirates	30123	ssRNA(+)	FALSE	FALSE	Homo sapiens
KY581693.1	Coronaviridae_26	Middle East respiratory syndrome-related coronavirus strain Hu/UAE_032_2014, complete genome	Coronaviridae	Betacoronavirus	Middle East respiratory syndrome-related coronavirus	lung, oronasopharynx	2014-04-20	United Arab Emirates	30123	ssRNA(+)	FALSE	FALSE	Homo sapiens
KY581694.1	Coronaviridae_26	Middle East respiratory syndrome-related coronavirus strain Hu/UAE_X_2014, complete genome	Coronaviridae	Betacoronavirus	Middle East respiratory syndrome-related coronavirus	lung, oronasopharynx	2014-06-01	United Arab Emirates	30123	ssRNA(+)	FALSE	FALSE	Homo sapiens
KY581695.1	Coronaviridae_26	Middle East respiratory syndrome-related coronavirus strain Camel/UAE_1B-A_2014, complete genome	Coronaviridae	Betacoronavirus	Middle East respiratory syndrome-related coronavirus	oronasopharynx	2014-06-01	United Arab Emirates	30123	ssRNA(+)	FALSE	FALSE	Camelus
KY581696.1	Coronaviridae_26	Middle East respiratory syndrome-related coronavirus strain Camel/UAE_1H-B_2014, complete genome	Coronaviridae	Betacoronavirus	Middle East respiratory syndrome-related coronavirus	oronasopharynx	2014-03-12	United Arab Emirates	30123	ssRNA(+)	FALSE	FALSE	Camelus
KY581697.1	Coronaviridae_26	Middle East respiratory syndrome-related coronavirus strain Camel/UAE_1H-D_2014, complete genome	Coronaviridae	Betacoronavirus	Middle East respiratory syndrome-related coronavirus	oronasopharynx	2014-02-18	United Arab Emirates	30123	ssRNA(+)	FALSE	FALSE	Camelus
KY581698.1	Coronaviridae_26	Middle East respiratory syndrome-related coronavirus strain Camel/UAE_1H-F_2014, complete genome	Coronaviridae	Betacoronavirus	Middle East respiratory syndrome-related coronavirus	oronasopharynx	2014-06-01	United Arab Emirates	30123	ssRNA(+)	FALSE	FALSE	Camelus
KY581699.1	Coronaviridae_26	Middle East respiratory syndrome-related coronavirus strain Camel/UAE_2B-E_2014, complete genome	Coronaviridae	Betacoronavirus	Middle East respiratory syndrome-related coronavirus	oronasopharynx	2014-06-01	United Arab Emirates	30123	ssRNA(+)	FALSE	FALSE	Camelus
KY581700.1	Coronaviridae_26	Middle East respiratory syndrome-related coronavirus strain Camel/UAE_3B-C_2014, complete genome	Coronaviridae	Betacoronavirus	Middle East respiratory syndrome-related coronavirus	oronasopharynx	2014-02-18	United Arab Emirates	30123	ssRNA(+)	FALSE	FALSE	Camelus
KY620116.1	Coronaviridae_6	Infectious bronchitis virus strain gammaCoV/ck/China/I1101/16, complete genome	Coronaviridae	Gammacoronavirus	Avian coronavirus		2016-06-01	China	27685	ssRNA(+)	FALSE	FALSE	Gallus gallus
KY621348.1	Coronaviridae_2	Human coronavirus 229E strain HCoV_229E/Seattle/USA/SC379/2016, complete genome	Coronaviridae	Alphacoronavirus	Human coronavirus 229E		2016-06-01	USA	27144	ssRNA(+)	FALSE	FALSE	Homo sapiens
KY626044.1	Coronaviridae_6	Avian coronavirus strain BR-I, complete genome	Coronaviridae	Gammacoronavirus	Avian coronavirus		2016-06-01	Brazil	27618	ssRNA(+)	FALSE	FALSE
KY626045.1	Coronaviridae_6	Avian coronavirus strain Ma5, complete genome	Coronaviridae	Gammacoronavirus	Avian coronavirus		2016-06-01	Brazil	27652	ssRNA(+)	FALSE	FALSE
KY649107.1	Coronaviridae_17	Porcine epidemic diarrhea virus strain CH-HNKF-16, complete genome	Coronaviridae	Alphacoronavirus	Porcine epidemic diarrhea virus	feces	2016-05-01	China	28032	ssRNA(+)	FALSE	FALSE	Sus scrofa
KY673148.1	Coronaviridae_26	Middle East respiratory syndrome-related coronavirus strain Hu/Oman_50_2015, complete genome	Coronaviridae	Betacoronavirus	Middle East respiratory syndrome-related coronavirus	oronasopharynx	2015-01-06	Oman	30123	ssRNA(+)	FALSE	FALSE	Homo sapiens
KY673149.1	Coronaviridae_26	Middle East respiratory syndrome-related coronavirus strain Camel/Oman_1_2015, complete genome	Coronaviridae	Betacoronavirus	Middle East respiratory syndrome-related coronavirus	oronasopharynx	2015-01-15	Oman	30123	ssRNA(+)	FALSE	FALSE	Camelus
KY674919.1	Coronaviridae_2	Human coronavirus 229E strain N08-434B, complete genome	Coronaviridae	Alphacoronavirus	Human coronavirus 229E		2008-06-01	USA	27136	ssRNA(+)	FALSE	FALSE	Homo sapiens
KY674921.1	Coronaviridae_13	Human coronavirus HKU1 strain N08-87, complete genome	Coronaviridae	Betacoronavirus	Human coronavirus HKU1		2016-06-01	USA	29820	ssRNA(+)	FALSE	FALSE	Homo sapiens
KY688118.1	Coronaviridae_26	Middle East respiratory syndrome-related coronavirus strain Hu/Khobar-KSA-6736/2015, complete genome	Coronaviridae	Betacoronavirus	Middle East respiratory syndrome-related coronavirus	lung, oronasopharynx	2015-02-07	Saudi Arabia	30075	ssRNA(+)	FALSE	FALSE	Homo sapiens
KY688119.1	Coronaviridae_26	Middle East respiratory syndrome-related coronavirus strain Hu/Aseer-KSA-Rs924/2015, complete genome	Coronaviridae	Betacoronavirus	Middle East respiratory syndrome-related coronavirus	lung, oronasopharynx	2015-05-01	Saudi Arabia	30061	ssRNA(+)	FALSE	FALSE	Homo sapiens
KY688120.1	Coronaviridae_26	Middle East respiratory syndrome-related coronavirus strain Hu/Hufuf-KSA-11002/2015, complete genome	Coronaviridae	Betacoronavirus	Middle East respiratory syndrome-related coronavirus	lung, oronasopharynx	2015-05-10	Saudi Arabia	30102	ssRNA(+)	FALSE	FALSE	Homo sapiens
KY688121.1	Coronaviridae_26	Middle East respiratory syndrome-related coronavirus strain Hu/Hufuf-KSA-11442/2015, complete genome	Coronaviridae	Betacoronavirus	Middle East respiratory syndrome-related coronavirus	lung, oronasopharynx	2015-05-22	Saudi Arabia	30039	ssRNA(+)	FALSE	FALSE	Homo sapiens
KY688122.1	Coronaviridae_26	Middle East respiratory syndrome-related coronavirus strain Hu/Hufuf-KSA-11767/2015, complete genome	Coronaviridae	Betacoronavirus	Middle East respiratory syndrome-related coronavirus	lung, oronasopharynx	2015-05-27	Saudi Arabia	30059	ssRNA(+)	FALSE	FALSE	Homo sapiens
KY688123.1	Coronaviridae_26	Middle East respiratory syndrome-related coronavirus strain Hu/Hufuf-KSA-11150/2015, complete genome	Coronaviridae	Betacoronavirus	Middle East respiratory syndrome-related coronavirus	lung, oronasopharynx	2015-05-13	Saudi Arabia	30102	ssRNA(+)	FALSE	FALSE	Homo sapiens
KY688124.1	Coronaviridae_26	Middle East respiratory syndrome-related coronavirus strain Hu/Hufuf-KSA-11401/2015, complete genome	Coronaviridae	Betacoronavirus	Middle East respiratory syndrome-related coronavirus	lung, oronasopharynx	2015-05-20	Saudi Arabia	30102	ssRNA(+)	FALSE	FALSE	Homo sapiens
KY689142.1	Coronaviridae_26	UNVERIFIED: Middle East respiratory syndrome-related coronavirus strain MERS-Cov/Riyadh-KSA/NGHA_ KAMC_2016 genomic sequence, sequence	Coronaviridae	Betacoronavirus	Middle East respiratory syndrome-related coronavirus		2016-01-15	Saudi Arabia	29837	ssRNA(+)	FALSE	FALSE	Homo sapiens
KY770850.1	Coronaviridae_47	Bat coronavirus isolate Anlong-43, complete genome	Coronaviridae		Bat coronavirus		2013-06-01	China	26883	ssRNA(+)	FALSE	FALSE	Myotis siligorensis
KY770851.1	Coronaviridae_47	Bat coronavirus isolate Anlong-57, complete genome	Coronaviridae		Bat coronavirus		2013-06-01	China	28096	ssRNA(+)	FALSE	FALSE	Myotis davidii
KY770858.1	Coronaviridae_3	Sarbecovirus sp. isolate Anlong-103, complete genome	Coronaviridae	Betacoronavirus	Sarbecovirus sp.		2013-06-01	China	29688	ssRNA(+)	FALSE	FALSE	Rhinolophus sinicus
KY770859.1	Coronaviridae_3	Sarbecovirus sp. isolate Anlong-112, complete genome	Coronaviridae	Betacoronavirus	Sarbecovirus sp.		2013-06-01	China	29667	ssRNA(+)	FALSE	FALSE	Rhinolophus sinicus
KY770860.1	Coronaviridae_3	Sarbecovirus sp. isolate Jiyuan-84, complete genome	Coronaviridae	Betacoronavirus	Sarbecovirus sp.		2012-06-01	China	29651	ssRNA(+)	FALSE	FALSE	Rhinolophus ferrumequinum
KY776701.1	Coronaviridae_6	Infectious bronchitis virus strain gammaCoV/ck/China/I0108/17, complete genome	Coronaviridae	Gammacoronavirus	Avian coronavirus		2017-06-01	China	27620	ssRNA(+)	FALSE	FALSE	Gallus gallus
KY793536.1	Coronaviridae_17	Porcine epidemic diarrhea virus strain CH/GX/2015/750A, complete genome	Coronaviridae	Alphacoronavirus	Porcine epidemic diarrhea virus	feces, abdominal cavity	2015-02-14	China	28038	ssRNA(+)	FALSE	FALSE	Sus scrofa
KY799179.1	Coronaviridae_29	Myotis lucifugus coronavirus, complete genome	Coronaviridae	Alphacoronavirus	Bat coronavirus CDPHE15		2010-11-15	Canada	28173	ssRNA(+)	FALSE	FALSE	Myotis lucifugus
KY805845.1	Coronaviridae_6	Infectious bronchitis virus isolate IBV/Ck/EG/CU/1/2014, complete genome	Coronaviridae	Gammacoronavirus	Avian coronavirus		2014-06-01	Egypt	27631	ssRNA(+)	FALSE	FALSE	Gallus gallus
KY805846.1	Coronaviridae_6	Infectious bronchitis virus isolate IBV/Ck/EG/CU/4/2014, complete genome	Coronaviridae	Gammacoronavirus	Avian coronavirus		2014-06-01	Egypt	27663	ssRNA(+)	FALSE	FALSE	Gallus gallus
KY825240.1	Coronaviridae_17	Porcine epidemic diarrhea virus isolate KNU-141112-S DEL2, complete genome	Coronaviridae	Alphacoronavirus	Porcine epidemic diarrhea virus		2016-01-15	South Korea	28032	ssRNA(+)	FALSE	FALSE	Sus scrofa
KY825242.1	Coronaviridae_17	Porcine epidemic diarrhea virus isolate KNU-141112-S DEL5, complete genome	Coronaviridae	Alphacoronavirus	Porcine epidemic diarrhea virus		2016-01-15	South Korea	28020	ssRNA(+)	FALSE	FALSE	Sus scrofa
KY926512.1	Coronaviridae_18	Porcine deltacoronavirus isolate KNU16-11, complete genome	Coronaviridae	Deltacoronavirus	Coronavirus HKU15	feces	2016-11-15	South Korea	25419	ssRNA(+)	FALSE	FALSE	Sus scrofa
KY928065.1	Coronaviridae_17	Porcine epidemic diarrhea virus isolate CH_hubei_2016, complete genome	Coronaviridae	Alphacoronavirus	Porcine epidemic diarrhea virus	feces	2016-03-15	China	28063	ssRNA(+)	FALSE	FALSE	Sus scrofa
KY938558.1	Coronaviridae_3	Sarbecovirus sp. strain 16BO133, complete genome	Coronaviridae	Betacoronavirus	Sarbecovirus sp.	oronasopharynx	2016-04-17	South Korea	29075	ssRNA(+)	FALSE	FALSE	Rhinolophus ferrumequinum
KY963963.1	Coronaviridae_17	Porcine epidemic diarrhea virus isolate KNU-1601, complete genome	Coronaviridae	Alphacoronavirus	Porcine epidemic diarrhea virus		2016-03-15	South Korea	28053	ssRNA(+)	FALSE	FALSE	Sus scrofa
KY983583.1	Coronaviridae_4	Human coronavirus OC43 strain HCoV_OC43/Seattle/USA/SC2481/2015, complete genome	Coronaviridae	Betacoronavirus	Betacoronavirus 1		2015-06-01	USA	30668	ssRNA(+)	FALSE	FALSE	Homo sapiens
KY983584.1	Coronaviridae_13	Human coronavirus HKU1 strain SC2628, complete genome	Coronaviridae	Betacoronavirus	Human coronavirus HKU1		2015-06-01	USA	29932	ssRNA(+)	FALSE	FALSE	Homo sapiens
KY983586.1	Coronaviridae_24	Human coronavirus NL63 strain HCoV_NL63/Seattle/USA/SC2940/2015, complete genome	Coronaviridae	Alphacoronavirus	Human coronavirus NL63		2015-06-01	USA	27489	ssRNA(+)	FALSE	FALSE	Homo sapiens
KY983587.1	Coronaviridae_2	Human coronavirus 229E strain HCoV_229E/Seattle/USA/SC3112/2015, complete genome	Coronaviridae	Alphacoronavirus	Human coronavirus 229E		2015-06-01	USA	27235	ssRNA(+)	FALSE	FALSE	Homo sapiens
KY994645.1	Coronaviridae_4	Porcine hemagglutinating encephalomyelitis virus strain JL/2008, complete genome	Coronaviridae	Betacoronavirus	Betacoronavirus 1	brain	2008-08-21	China	30684	ssRNA(+)	FALSE	FALSE	Sus scrofa
LC022792.1	Coronaviridae_17	Porcine epidemic diarrhea virus genomic RNA, complete genome, strain: Tottori2/JPN/2014	Coronaviridae	Alphacoronavirus	Porcine epidemic diarrhea virus		2014-10-15	Japan	27342	ssRNA(+)	FALSE	FALSE	Sus scrofa
LC053455.1	Coronaviridae_17	Porcine epidemic diarrhea virus genomic RNA, complete genome, isolate: AVCT12	Coronaviridae	Alphacoronavirus	Porcine epidemic diarrhea virus		2010-01-15	Thailand	27991	ssRNA(+)	FALSE	FALSE
LC061272.1	Coronaviridae_4	Equine coronavirus RNA, complete genome, strain: Tokachi09	Coronaviridae	Betacoronavirus	Betacoronavirus 1		2009-06-01	Japan	30782	ssRNA(+)	FALSE	FALSE	Equus caballus
LC061273.1	Coronaviridae_4	Equine coronavirus RNA, complete genome, strain: Obihiro12-1	Coronaviridae	Betacoronavirus	Betacoronavirus 1		2012-06-01	Japan	30916	ssRNA(+)	FALSE	FALSE	Equus caballus
LC061274.1	Coronaviridae_4	Equine coronavirus RNA, complete genome, strain: Obihiro12-2	Coronaviridae	Betacoronavirus	Betacoronavirus 1		2012-06-01	Japan	30916	ssRNA(+)	FALSE	FALSE	Equus caballus
LC063810.1	Coronaviridae_17	Porcine epidemic diarrhea virus genomic RNA, complete genome, strain: AOM-1/JPN/2014	Coronaviridae	Alphacoronavirus	Porcine epidemic diarrhea virus		2014-02-15	Japan	27904	ssRNA(+)	FALSE	FALSE	Sus scrofa domesticus
LC063811.1	Coronaviridae_17	Porcine epidemic diarrhea virus genomic RNA, complete genome, strain: FKO-1/JPN/2014	Coronaviridae	Alphacoronavirus	Porcine epidemic diarrhea virus		2014-03-15	Japan	27904	ssRNA(+)	FALSE	FALSE	Sus scrofa domesticus
LC063812.1	Coronaviridae_17	Porcine epidemic diarrhea virus genomic RNA, complete genome, strain: EHM-1/JPN/2014	Coronaviridae	Alphacoronavirus	Porcine epidemic diarrhea virus		2014-04-15	Japan	27904	ssRNA(+)	FALSE	FALSE	Sus scrofa domesticus
LC063813.1	Coronaviridae_17	Porcine epidemic diarrhea virus genomic RNA, complete genome, strain: IWT-4/JPN/2014	Coronaviridae	Alphacoronavirus	Porcine epidemic diarrhea virus		2014-04-15	Japan	27904	ssRNA(+)	FALSE	FALSE	Sus scrofa domesticus
LC063814.1	Coronaviridae_17	Porcine epidemic diarrhea virus genomic RNA, complete genome, strain: KGS-1/JPN/2013	Coronaviridae	Alphacoronavirus	Porcine epidemic diarrhea virus		2013-12-15	Japan	27904	ssRNA(+)	FALSE	FALSE	Sus scrofa domesticus
LC063815.1	Coronaviridae_17	Porcine epidemic diarrhea virus genomic RNA, complete genome, strain: KGS-2/JPN/2013	Coronaviridae	Alphacoronavirus	Porcine epidemic diarrhea virus		2013-12-15	Japan	27904	ssRNA(+)	FALSE	FALSE	Sus scrofa domesticus
LC063816.1	Coronaviridae_17	Porcine epidemic diarrhea virus genomic RNA, complete genome, strain: OKN-2/JPN/2014	Coronaviridae	Alphacoronavirus	Porcine epidemic diarrhea virus		2014-02-15	Japan	27904	ssRNA(+)	FALSE	FALSE	Sus scrofa domesticus
LC063817.1	Coronaviridae_17	Porcine epidemic diarrhea virus genomic RNA, complete genome, strain: KMM-1/JPN/2014	Coronaviridae	Alphacoronavirus	Porcine epidemic diarrhea virus		2014-01-15	Japan	27904	ssRNA(+)	FALSE	FALSE	Sus scrofa domesticus
LC063818.1	Coronaviridae_17	Porcine epidemic diarrhea virus genomic RNA, complete genome, strain: KMM-2/JPN/2014	Coronaviridae	Alphacoronavirus	Porcine epidemic diarrhea virus		2014-01-15	Japan	27904	ssRNA(+)	FALSE	FALSE	Sus scrofa domesticus
LC063819.1	Coronaviridae_17	Porcine epidemic diarrhea virus genomic RNA, complete genome, strain: IBR-5/JPN/2014	Coronaviridae	Alphacoronavirus	Porcine epidemic diarrhea virus		2014-04-15	Japan	27904	ssRNA(+)	FALSE	FALSE	Sus scrofa domesticus
LC063820.1	Coronaviridae_17	Porcine epidemic diarrhea virus genomic RNA, complete genome, strain: IBR-1/JPN/2013	Coronaviridae	Alphacoronavirus	Porcine epidemic diarrhea virus		2013-11-15	Japan	27904	ssRNA(+)	FALSE	FALSE	Sus scrofa domesticus
LC063821.1	Coronaviridae_17	Porcine epidemic diarrhea virus genomic RNA, complete genome, strain: IBR-2/JPN/2013	Coronaviridae	Alphacoronavirus	Porcine epidemic diarrhea virus		2013-11-15	Japan	27904	ssRNA(+)	FALSE	FALSE	Sus scrofa domesticus
LC063822.1	Coronaviridae_17	Porcine epidemic diarrhea virus genomic RNA, complete genome, strain: TTR-1/JPN/2014	Coronaviridae	Alphacoronavirus	Porcine epidemic diarrhea virus		2014-03-15	Japan	27904	ssRNA(+)	FALSE	FALSE	Sus scrofa domesticus
LC063823.1	Coronaviridae_17	Porcine epidemic diarrhea virus genomic RNA, complete genome, strain: GNM-1/JPN/2014	Coronaviridae	Alphacoronavirus	Porcine epidemic diarrhea virus		2014-04-15	Japan	27904	ssRNA(+)	FALSE	FALSE	Sus scrofa domesticus
LC063824.1	Coronaviridae_17	Porcine epidemic diarrhea virus genomic RNA, complete genome, strain: KGW-1/JPN/2014	Coronaviridae	Alphacoronavirus	Porcine epidemic diarrhea virus		2014-04-15	Japan	27904	ssRNA(+)	FALSE	FALSE	Sus scrofa domesticus
LC063825.1	Coronaviridae_17	Porcine epidemic diarrhea virus genomic RNA, complete genome, strain: HRS-1/JPN/2014	Coronaviridae	Alphacoronavirus	Porcine epidemic diarrhea virus		2014-05-15	Japan	27904	ssRNA(+)	FALSE	FALSE	Sus scrofa domesticus
LC063826.1	Coronaviridae_17	Porcine epidemic diarrhea virus genomic RNA, complete genome, strain: KGS-4/JPN/2014	Coronaviridae	Alphacoronavirus	Porcine epidemic diarrhea virus		2014-04-15	Japan	27904	ssRNA(+)	FALSE	FALSE	Sus scrofa domesticus
LC063827.1	Coronaviridae_17	Porcine epidemic diarrhea virus genomic RNA, complete genome, strain: MIE-1/JPN/2014	Coronaviridae	Alphacoronavirus	Porcine epidemic diarrhea virus		2014-03-15	Japan	27904	ssRNA(+)	FALSE	FALSE	Sus scrofa domesticus
LC063828.1	Coronaviridae_17	Porcine epidemic diarrhea virus genomic RNA, complete genome, strain: TTR-2/JPN/2014	Coronaviridae	Alphacoronavirus	Porcine epidemic diarrhea virus		2014-10-15	Japan	27322	ssRNA(+)	FALSE	FALSE	Sus scrofa domesticus
LC063829.1	Coronaviridae_17	Porcine epidemic diarrhea virus genomic RNA, complete genome, strain: GNM-2/JPN/2014	Coronaviridae	Alphacoronavirus	Porcine epidemic diarrhea virus		2014-04-15	Japan	27904	ssRNA(+)	FALSE	FALSE	Sus scrofa domesticus
LC063830.1	Coronaviridae_17	Porcine epidemic diarrhea virus genomic RNA, complete genome, strain: NIG-1/JPN/2014	Coronaviridae	Alphacoronavirus	Porcine epidemic diarrhea virus		2014-04-15	Japan	27904	ssRNA(+)	FALSE	FALSE	Sus scrofa domesticus
LC063831.1	Coronaviridae_17	Porcine epidemic diarrhea virus genomic RNA, complete genome, strain: IBR-6/JPN/2014	Coronaviridae	Alphacoronavirus	Porcine epidemic diarrhea virus		2014-05-15	Japan	27904	ssRNA(+)	FALSE	FALSE	Sus scrofa domesticus
LC063832.1	Coronaviridae_17	Porcine epidemic diarrhea virus genomic RNA, complete genome, strain: IBR-7/JPN/2014	Coronaviridae	Alphacoronavirus	Porcine epidemic diarrhea virus		2014-05-15	Japan	27904	ssRNA(+)	FALSE	FALSE	Sus scrofa domesticus
LC063833.1	Coronaviridae_17	Porcine epidemic diarrhea virus genomic RNA, complete genome, strain: AOM-3/JPN/2014	Coronaviridae	Alphacoronavirus	Porcine epidemic diarrhea virus		2014-04-15	Japan	27904	ssRNA(+)	FALSE	FALSE	Sus scrofa domesticus
LC063834.1	Coronaviridae_17	Porcine epidemic diarrhea virus genomic RNA, complete genome, strain: IWT-1/JPN/2014	Coronaviridae	Alphacoronavirus	Porcine epidemic diarrhea virus		2014-04-15	Japan	27904	ssRNA(+)	FALSE	FALSE	Sus scrofa domesticus
LC063835.1	Coronaviridae_17	Porcine epidemic diarrhea virus genomic RNA, complete genome, strain: IWT-3/JPN/2014	Coronaviridae	Alphacoronavirus	Porcine epidemic diarrhea virus		2014-04-15	Japan	27904	ssRNA(+)	FALSE	FALSE	Sus scrofa domesticus
LC063836.1	Coronaviridae_17	Porcine epidemic diarrhea virus genomic RNA, complete genome, strain: OKN-1/JPN/2013	Coronaviridae	Alphacoronavirus	Porcine epidemic diarrhea virus		2013-10-15	Japan	27904	ssRNA(+)	FALSE	FALSE	Sus scrofa domesticus
LC063837.1	Coronaviridae_17	Porcine epidemic diarrhea virus genomic RNA, complete genome, strain: AOM-2/JPN/2014	Coronaviridae	Alphacoronavirus	Porcine epidemic diarrhea virus		2014-04-15	Japan	27904	ssRNA(+)	FALSE	FALSE	Sus scrofa domesticus
LC063838.1	Coronaviridae_17	Porcine epidemic diarrhea virus genomic RNA, complete genome, strain: MYG-1/JPN/2014	Coronaviridae	Alphacoronavirus	Porcine epidemic diarrhea virus		2014-07-15	Japan	27481	ssRNA(+)	FALSE	FALSE	Sus scrofa domesticus
LC063839.1	Coronaviridae_17	Porcine epidemic diarrhea virus genomic RNA, complete genome, strain: IWT-2/JPN/2014	Coronaviridae	Alphacoronavirus	Porcine epidemic diarrhea virus		2014-04-15	Japan	27904	ssRNA(+)	FALSE	FALSE	Sus scrofa domesticus
LC063840.1	Coronaviridae_17	Porcine epidemic diarrhea virus genomic RNA, complete genome, strain: NIG-2/JPN/2014	Coronaviridae	Alphacoronavirus	Porcine epidemic diarrhea virus		2014-04-15	Japan	27904	ssRNA(+)	FALSE	FALSE	Sus scrofa domesticus
LC063841.1	Coronaviridae_17	Porcine epidemic diarrhea virus genomic RNA, complete genome, strain: IBR-3/JPN/2014	Coronaviridae	Alphacoronavirus	Porcine epidemic diarrhea virus		2014-04-15	Japan	27904	ssRNA(+)	FALSE	FALSE	Sus scrofa domesticus
LC063842.1	Coronaviridae_17	Porcine epidemic diarrhea virus genomic RNA, complete genome, strain: IBR-4/JPN/2014	Coronaviridae	Alphacoronavirus	Porcine epidemic diarrhea virus		2014-04-15	Japan	27904	ssRNA(+)	FALSE	FALSE	Sus scrofa domesticus
LC063843.1	Coronaviridae_17	Porcine epidemic diarrhea virus genomic RNA, complete genome, strain: IBR-8/JPN/2014	Coronaviridae	Alphacoronavirus	Porcine epidemic diarrhea virus		2014-05-15	Japan	27904	ssRNA(+)	FALSE	FALSE	Sus scrofa domesticus
LC063844.1	Coronaviridae_17	Porcine epidemic diarrhea virus genomic RNA, complete genome, strain: KCH-1/JPN/2014	Coronaviridae	Alphacoronavirus	Porcine epidemic diarrhea virus		2014-03-15	Japan	27895	ssRNA(+)	FALSE	FALSE	Sus scrofa domesticus
LC063845.1	Coronaviridae_17	Porcine epidemic diarrhea virus genomic RNA, complete genome, strain: KCH-2/JPN/2014	Coronaviridae	Alphacoronavirus	Porcine epidemic diarrhea virus		2014-03-15	Japan	27895	ssRNA(+)	FALSE	FALSE	Sus scrofa domesticus
LC063846.1	Coronaviridae_17	Porcine epidemic diarrhea virus genomic RNA, complete genome, strain: MYZ-1/JPN/2013	Coronaviridae	Alphacoronavirus	Porcine epidemic diarrhea virus		2013-12-15	Japan	27895	ssRNA(+)	FALSE	FALSE	Sus scrofa domesticus
LC063847.1	Coronaviridae_17	Porcine epidemic diarrhea virus genomic RNA, complete genome, strain: OKY-1/JPN/2014	Coronaviridae	Alphacoronavirus	Porcine epidemic diarrhea virus		2014-03-15	Japan	27895	ssRNA(+)	FALSE	FALSE	Sus scrofa domesticus
LC216914.1	Coronaviridae_18	Coronavirus HKU15 genomic RNA, complete genome, strain: S579N	Coronaviridae	Deltacoronavirus	Coronavirus HKU15	oronasopharynx	2014-02-13	Hong Kong	25422	ssRNA(+)	FALSE	FALSE	Sus scrofa domesticus
LC216915.1	Coronaviridae_18	Coronavirus HKU15 genomic RNA, complete genome, strain: S582N	Coronaviridae	Deltacoronavirus	Coronavirus HKU15	oronasopharynx	2014-02-13	Hong Kong	25406	ssRNA(+)	FALSE	FALSE	Sus scrofa domesticus
LC260038.1	Coronaviridae_18	Porcine deltacoronavirus genomic RNA, complete genome, strain: AKT/JPN/2014	Coronaviridae	Deltacoronavirus	Coronavirus HKU15		2014-05-15	Japan	25362	ssRNA(+)	FALSE	FALSE	Sus scrofa domesticus
LC260039.1	Coronaviridae_18	Porcine deltacoronavirus genomic RNA, complete genome, strain: GNM-1/JPN/2014	Coronaviridae	Deltacoronavirus	Coronavirus HKU15		2014-05-15	Japan	25362	ssRNA(+)	FALSE	FALSE	Sus scrofa domesticus
LC260040.1	Coronaviridae_18	Porcine deltacoronavirus genomic RNA, complete genome, strain: GNM-2/JPN/2014	Coronaviridae	Deltacoronavirus	Coronavirus HKU15		2014-05-15	Japan	25362	ssRNA(+)	FALSE	FALSE	Sus scrofa domesticus
LC260041.1	Coronaviridae_18	Porcine deltacoronavirus genomic RNA, complete genome, strain: IWT/JPN/2014	Coronaviridae	Deltacoronavirus	Coronavirus HKU15		2014-05-15	Japan	25362	ssRNA(+)	FALSE	FALSE	Sus scrofa domesticus
LC260042.1	Coronaviridae_18	Porcine deltacoronavirus genomic RNA, complete genome, strain: MYZ/JPN/2014	Coronaviridae	Deltacoronavirus	Coronavirus HKU15		2014-03-15	Japan	25362	ssRNA(+)	FALSE	FALSE	Sus scrofa domesticus
LC260043.1	Coronaviridae_18	Porcine deltacoronavirus genomic RNA, complete genome, strain: OKN/JPN/2014	Coronaviridae	Deltacoronavirus	Coronavirus HKU15		2014-08-15	Japan	25362	ssRNA(+)	FALSE	FALSE	Sus scrofa domesticus
LC260044.1	Coronaviridae_18	Porcine deltacoronavirus genomic RNA, complete genome, strain: YMG/JPN/2014	Coronaviridae	Deltacoronavirus	Coronavirus HKU15		2014-12-15	Japan	25362	ssRNA(+)	FALSE	FALSE	Sus scrofa domesticus
LC260045.1	Coronaviridae_18	Porcine deltacoronavirus genomic RNA, complete genome, strain: HKD/JPN/2016	Coronaviridae	Deltacoronavirus	Coronavirus HKU15		2016-09-15	Japan	25359	ssRNA(+)	FALSE	FALSE	Sus scrofa domesticus
LC315646.2	Coronaviridae_4	Human coronavirus OC43 Tokyo/SGH-36/2014 RNA, complete genome	Coronaviridae	Betacoronavirus	Betacoronavirus 1		2014-06-01	Japan	30736	ssRNA(+)	FALSE	FALSE	Homo sapiens
LC315648.2	Coronaviridae_4	Human coronavirus OC43 Tokyo/SGH-06/2015 RNA, complete genome	Coronaviridae	Betacoronavirus	Betacoronavirus 1		2015-06-01	Japan	30714	ssRNA(+)	FALSE	FALSE	Homo sapiens
LC315650.2	Coronaviridae_13	Human coronavirus HKU1 Tokyo/SGH-15/2014 RNA, complete genome	Coronaviridae	Betacoronavirus	Human coronavirus HKU1		2014-06-01	Japan	29804	ssRNA(+)	FALSE	FALSE	Homo sapiens
LC315651.2	Coronaviridae_13	Human coronavirus HKU1 Tokyo/SGH-18/2016 RNA, complete genome	Coronaviridae	Betacoronavirus	Human coronavirus HKU1		2016-06-01	Japan	29903	ssRNA(+)	FALSE	FALSE	Homo sapiens
LC364342.1	Coronaviridae_48	Falcon coronavirus UAE-HKU27 988F genomic RNA, complete genome	Coronaviridae	Deltacoronavirus	Falcon coronavirus UAE-HKU27		2013-12-05	United Arab Emirates	26162	ssRNA(+)	FALSE	FALSE	Falco
LC364343.1	Coronaviridae_48	Houbara coronavirus UAE-HKU28 285F genomic RNA, complete genome	Coronaviridae	Deltacoronavirus	Houbara coronavirus UAE-HKU28		2013-04-07	United Arab Emirates	26155	ssRNA(+)	FALSE	FALSE	Chlamydotis
LC364344.1	Coronaviridae_48	Pigeon coronavirus UAE-HKU29 271F genomic RNA, complete genome	Coronaviridae	Deltacoronavirus	Pigeon coronavirus UAE-HKU29		2017-03-28	United Arab Emirates	26155	ssRNA(+)	FALSE	FALSE	Columbidae
LC364345.1	Coronaviridae_18	Quail coronavirus UAE-HKU30 411F genomic RNA, complete genome	Coronaviridae	Deltacoronavirus	Quail coronavirus UAE-HKU30		2013-06-23	United Arab Emirates	25874	ssRNA(+)	FALSE	FALSE	Galliformes
LC364346.1	Coronaviridae_18	Quail coronavirus UAE-HKU30 1101F genomic RNA, complete genome	Coronaviridae	Deltacoronavirus	Quail coronavirus UAE-HKU30		2014-02-19	United Arab Emirates	25871	ssRNA(+)	FALSE	FALSE	Galliformes
LC488390.2	Coronaviridae_24	Human coronavirus NL63 Tokyo/SGH-15/2017 RNA, complete genome	Coronaviridae	Alphacoronavirus	Human coronavirus NL63	oronasopharynx	2017-06-01	Japan	27550	ssRNA(+)	FALSE	FALSE	Homo sapiens
LC494126.1	Coronaviridae_4	Bovine coronavirus GIF-1 RNA, complete genome	Coronaviridae	Betacoronavirus	Betacoronavirus 1		2016-01-15	Japan	30951	ssRNA(+)	FALSE	FALSE
LC494127.1	Coronaviridae_4	Bovine coronavirus IWT-9 RNA, complete genome	Coronaviridae	Betacoronavirus	Betacoronavirus 1		2012-04-15	Japan	30951	ssRNA(+)	FALSE	FALSE
LC494128.1	Coronaviridae_4	Bovine coronavirus IWT-10 RNA, complete genome	Coronaviridae	Betacoronavirus	Betacoronavirus 1		2012-05-15	Japan	30954	ssRNA(+)	FALSE	FALSE
LC494129.1	Coronaviridae_4	Bovine coronavirus IWT-1 RNA, complete genome	Coronaviridae	Betacoronavirus	Betacoronavirus 1		2010-10-15	Japan	30934	ssRNA(+)	FALSE	FALSE
LC494130.1	Coronaviridae_4	Bovine coronavirus IWT-2 RNA, complete genome	Coronaviridae	Betacoronavirus	Betacoronavirus 1		2010-12-15	Japan	30954	ssRNA(+)	FALSE	FALSE
LC494131.1	Coronaviridae_4	Bovine coronavirus IWT-3 RNA, complete genome	Coronaviridae	Betacoronavirus	Betacoronavirus 1		2011-06-15	Japan	30955	ssRNA(+)	FALSE	FALSE
LC494132.1	Coronaviridae_4	Bovine coronavirus IWT-4 RNA, complete genome	Coronaviridae	Betacoronavirus	Betacoronavirus 1		2011-06-15	Japan	30954	ssRNA(+)	FALSE	FALSE
LC494133.1	Coronaviridae_4	Bovine coronavirus IWT-5 RNA, complete genome	Coronaviridae	Betacoronavirus	Betacoronavirus 1		2011-11-15	Japan	30954	ssRNA(+)	FALSE	FALSE
LC494134.1	Coronaviridae_4	Bovine coronavirus IWT-6 RNA, complete genome	Coronaviridae	Betacoronavirus	Betacoronavirus 1		2012-12-15	Japan	30951	ssRNA(+)	FALSE	FALSE
LC494135.1	Coronaviridae_4	Bovine coronavirus IWT-7 RNA, complete genome	Coronaviridae	Betacoronavirus	Betacoronavirus 1		2012-01-15	Japan	30945	ssRNA(+)	FALSE	FALSE
LC494136.1	Coronaviridae_4	Bovine coronavirus IWT-8 RNA, complete genome	Coronaviridae	Betacoronavirus	Betacoronavirus 1		2012-01-15	Japan	30941	ssRNA(+)	FALSE	FALSE
LC494137.1	Coronaviridae_4	Bovine coronavirus IWT-11 RNA, complete genome	Coronaviridae	Betacoronavirus	Betacoronavirus 1		2013-12-15	Japan	30951	ssRNA(+)	FALSE	FALSE
LC494138.1	Coronaviridae_4	Bovine coronavirus IWT-12 RNA, complete genome	Coronaviridae	Betacoronavirus	Betacoronavirus 1		2015-05-15	Japan	30954	ssRNA(+)	FALSE	FALSE
LC494139.1	Coronaviridae_4	Bovine coronavirus IWT-13 RNA, complete genome	Coronaviridae	Betacoronavirus	Betacoronavirus 1		2015-06-15	Japan	30942	ssRNA(+)	FALSE	FALSE
LC494140.1	Coronaviridae_4	Bovine coronavirus IWT-14 RNA, complete genome	Coronaviridae	Betacoronavirus	Betacoronavirus 1		2015-11-15	Japan	30939	ssRNA(+)	FALSE	FALSE
LC494141.1	Coronaviridae_4	Bovine coronavirus IWT-15 RNA, complete genome	Coronaviridae	Betacoronavirus	Betacoronavirus 1		2016-01-15	Japan	30950	ssRNA(+)	FALSE	FALSE
LC494142.1	Coronaviridae_4	Bovine coronavirus IWT-18 RNA, complete genome	Coronaviridae	Betacoronavirus	Betacoronavirus 1		2016-12-15	Japan	30954	ssRNA(+)	FALSE	FALSE
LC494143.1	Coronaviridae_4	Bovine coronavirus IWT-19 RNA, complete genome	Coronaviridae	Betacoronavirus	Betacoronavirus 1		2016-12-15	Japan	30954	ssRNA(+)	FALSE	FALSE
LC494144.1	Coronaviridae_4	Bovine coronavirus IWT-20 RNA, complete genome	Coronaviridae	Betacoronavirus	Betacoronavirus 1		2016-12-15	Japan	30954	ssRNA(+)	FALSE	FALSE
LC494145.1	Coronaviridae_4	Bovine coronavirus IWT-21 RNA, complete genome	Coronaviridae	Betacoronavirus	Betacoronavirus 1		2016-12-15	Japan	30954	ssRNA(+)	FALSE	FALSE
LC494146.1	Coronaviridae_4	Bovine coronavirus IWT-16 RNA, complete genome	Coronaviridae	Betacoronavirus	Betacoronavirus 1		2016-07-15	Japan	30954	ssRNA(+)	FALSE	FALSE
LC494147.1	Coronaviridae_4	Bovine coronavirus IWT-17 RNA, complete genome	Coronaviridae	Betacoronavirus	Betacoronavirus 1		2016-11-15	Japan	30944	ssRNA(+)	FALSE	FALSE
LC494148.1	Coronaviridae_4	Bovine coronavirus IWT-22 RNA, complete genome	Coronaviridae	Betacoronavirus	Betacoronavirus 1		2016-12-15	Japan	30946	ssRNA(+)	FALSE	FALSE
LC494149.1	Coronaviridae_4	Bovine coronavirus IWT-23 RNA, complete genome	Coronaviridae	Betacoronavirus	Betacoronavirus 1		2016-12-15	Japan	30944	ssRNA(+)	FALSE	FALSE
LC494150.1	Coronaviridae_4	Bovine coronavirus IWT-24 RNA, complete genome	Coronaviridae	Betacoronavirus	Betacoronavirus 1		2017-01-15	Japan	30954	ssRNA(+)	FALSE	FALSE
LC494151.1	Coronaviridae_4	Bovine coronavirus IWT-25 RNA, complete genome	Coronaviridae	Betacoronavirus	Betacoronavirus 1		2017-01-15	Japan	30951	ssRNA(+)	FALSE	FALSE
LC494152.1	Coronaviridae_4	Bovine coronavirus IWT-26 RNA, complete genome	Coronaviridae	Betacoronavirus	Betacoronavirus 1		2017-02-15	Japan	30950	ssRNA(+)	FALSE	FALSE
LC494153.1	Coronaviridae_4	Bovine coronavirus IWT-27 RNA, complete genome	Coronaviridae	Betacoronavirus	Betacoronavirus 1		2017-02-15	Japan	30944	ssRNA(+)	FALSE	FALSE
LC494154.1	Coronaviridae_4	Bovine coronavirus SHG-1 RNA, complete genome	Coronaviridae	Betacoronavirus	Betacoronavirus 1		2014-09-15	Japan	30936	ssRNA(+)	FALSE	FALSE
LC494155.1	Coronaviridae_4	Bovine coronavirus SHG-2 RNA, complete genome	Coronaviridae	Betacoronavirus	Betacoronavirus 1		2014-09-15	Japan	30938	ssRNA(+)	FALSE	FALSE
LC494156.1	Coronaviridae_4	Bovine coronavirus SHG-3 RNA, complete genome	Coronaviridae	Betacoronavirus	Betacoronavirus 1		2014-12-15	Japan	30942	ssRNA(+)	FALSE	FALSE
LC494157.1	Coronaviridae_4	Bovine coronavirus SHG-4 RNA, complete genome	Coronaviridae	Betacoronavirus	Betacoronavirus 1		2015-10-15	Japan	30953	ssRNA(+)	FALSE	FALSE
LC494158.1	Coronaviridae_4	Bovine coronavirus SHG-5 RNA, complete genome	Coronaviridae	Betacoronavirus	Betacoronavirus 1		2016-06-15	Japan	30950	ssRNA(+)	FALSE	FALSE
LC494159.1	Coronaviridae_4	Bovine coronavirus SHG-6 RNA, complete genome	Coronaviridae	Betacoronavirus	Betacoronavirus 1		2017-10-15	Japan	30947	ssRNA(+)	FALSE	FALSE
LC494160.1	Coronaviridae_4	Bovine coronavirus TCG-4 RNA, complete genome	Coronaviridae	Betacoronavirus	Betacoronavirus 1		2007-11-15	Japan	30954	ssRNA(+)	FALSE	FALSE
LC494161.1	Coronaviridae_4	Bovine coronavirus TCG-5 RNA, complete genome	Coronaviridae	Betacoronavirus	Betacoronavirus 1		2007-12-15	Japan	30940	ssRNA(+)	FALSE	FALSE
LC494162.1	Coronaviridae_4	Bovine coronavirus TCG-3 RNA, complete genome	Coronaviridae	Betacoronavirus	Betacoronavirus 1		2006-12-15	Japan	30936	ssRNA(+)	FALSE	FALSE
LC494163.1	Coronaviridae_4	Bovine coronavirus TCG-2 RNA, complete genome	Coronaviridae	Betacoronavirus	Betacoronavirus 1		2006-12-15	Japan	30923	ssRNA(+)	FALSE	FALSE
LC494164.1	Coronaviridae_4	Bovine coronavirus TCG-1 RNA, complete genome	Coronaviridae	Betacoronavirus	Betacoronavirus 1		2006-11-15	Japan	30951	ssRNA(+)	FALSE	FALSE
LC494165.1	Coronaviridae_4	Bovine coronavirus TCG-10 RNA, complete genome	Coronaviridae	Betacoronavirus	Betacoronavirus 1		2008-12-15	Japan	30926	ssRNA(+)	FALSE	FALSE
LC494166.1	Coronaviridae_4	Bovine coronavirus TCG-11 RNA, complete genome	Coronaviridae	Betacoronavirus	Betacoronavirus 1		2008-12-15	Japan	30934	ssRNA(+)	FALSE	FALSE
LC494167.1	Coronaviridae_4	Bovine coronavirus TCG-12 RNA, complete genome	Coronaviridae	Betacoronavirus	Betacoronavirus 1		2008-12-15	Japan	30942	ssRNA(+)	FALSE	FALSE
LC494168.1	Coronaviridae_4	Bovine coronavirus TCG-13 RNA, complete genome	Coronaviridae	Betacoronavirus	Betacoronavirus 1		2009-01-15	Japan	30950	ssRNA(+)	FALSE	FALSE
LC494169.1	Coronaviridae_4	Bovine coronavirus TCG-14 RNA, complete genome	Coronaviridae	Betacoronavirus	Betacoronavirus 1		2009-03-15	Japan	30945	ssRNA(+)	FALSE	FALSE
LC494170.1	Coronaviridae_4	Bovine coronavirus TCG-15 RNA, complete genome	Coronaviridae	Betacoronavirus	Betacoronavirus 1		2010-01-15	Japan	30938	ssRNA(+)	FALSE	FALSE
LC494171.1	Coronaviridae_4	Bovine coronavirus TCG-16 RNA, complete genome	Coronaviridae	Betacoronavirus	Betacoronavirus 1		2010-01-15	Japan	30936	ssRNA(+)	FALSE	FALSE
LC494172.1	Coronaviridae_4	Bovine coronavirus TCG-6 RNA, complete genome	Coronaviridae	Betacoronavirus	Betacoronavirus 1		2007-12-15	Japan	30952	ssRNA(+)	FALSE	FALSE
LC494173.1	Coronaviridae_4	Bovine coronavirus TCG-7 RNA, complete genome	Coronaviridae	Betacoronavirus	Betacoronavirus 1		2008-01-15	Japan	30951	ssRNA(+)	FALSE	FALSE
LC494174.1	Coronaviridae_4	Bovine coronavirus TCG-8 RNA, complete genome	Coronaviridae	Betacoronavirus	Betacoronavirus 1		2008-01-15	Japan	30951	ssRNA(+)	FALSE	FALSE
LC494175.1	Coronaviridae_4	Bovine coronavirus TCG-18 RNA, complete genome	Coronaviridae	Betacoronavirus	Betacoronavirus 1		2016-06-01	Japan	30941	ssRNA(+)	FALSE	FALSE
LC494176.1	Coronaviridae_4	Bovine coronavirus TCG-17 RNA, complete genome	Coronaviridae	Betacoronavirus	Betacoronavirus 1		2016-06-01	Japan	30945	ssRNA(+)	FALSE	FALSE
LC494177.1	Coronaviridae_4	Bovine coronavirus TCG-9 RNA, complete genome	Coronaviridae	Betacoronavirus	Betacoronavirus 1		2008-03-15	Japan	30936	ssRNA(+)	FALSE	FALSE
LC494178.1	Coronaviridae_4	Bovine coronavirus TCG-19 RNA, complete genome	Coronaviridae	Betacoronavirus	Betacoronavirus 1		2016-12-15	Japan	30949	ssRNA(+)	FALSE	FALSE
LC494179.1	Coronaviridae_4	Bovine coronavirus TCG-20 RNA, complete genome	Coronaviridae	Betacoronavirus	Betacoronavirus 1		2016-12-15	Japan	30936	ssRNA(+)	FALSE	FALSE
LC494180.1	Coronaviridae_4	Bovine coronavirus TCG-21 RNA, complete genome	Coronaviridae	Betacoronavirus	Betacoronavirus 1		2016-12-15	Japan	30939	ssRNA(+)	FALSE	FALSE
LC494181.1	Coronaviridae_4	Bovine coronavirus TCG-22 RNA, complete genome	Coronaviridae	Betacoronavirus	Betacoronavirus 1		2016-12-15	Japan	30923	ssRNA(+)	FALSE	FALSE
LC494182.1	Coronaviridae_4	Bovine coronavirus TCG-23 RNA, complete genome	Coronaviridae	Betacoronavirus	Betacoronavirus 1		2016-12-15	Japan	30940	ssRNA(+)	FALSE	FALSE
LC494183.1	Coronaviridae_4	Bovine coronavirus TCG-24 RNA, complete genome	Coronaviridae	Betacoronavirus	Betacoronavirus 1		2017-12-15	Japan	30936	ssRNA(+)	FALSE	FALSE
LC494184.1	Coronaviridae_4	Bovine coronavirus TCG-25 RNA, complete genome	Coronaviridae	Betacoronavirus	Betacoronavirus 1		2017-12-15	Japan	30940	ssRNA(+)	FALSE	FALSE
LC494185.1	Coronaviridae_4	Bovine coronavirus TCG-26 RNA, complete genome	Coronaviridae	Betacoronavirus	Betacoronavirus 1		2017-12-15	Japan	30942	ssRNA(+)	FALSE	FALSE
LC494186.1	Coronaviridae_4	Bovine coronavirus TCG-27 RNA, complete genome	Coronaviridae	Betacoronavirus	Betacoronavirus 1		2017-12-15	Japan	30942	ssRNA(+)	FALSE	FALSE
LC494187.1	Coronaviridae_4	Bovine coronavirus TCG-28 RNA, complete genome	Coronaviridae	Betacoronavirus	Betacoronavirus 1		2017-12-15	Japan	30940	ssRNA(+)	FALSE	FALSE
LC494188.1	Coronaviridae_4	Bovine coronavirus TCG-29 RNA, complete genome	Coronaviridae	Betacoronavirus	Betacoronavirus 1		2017-12-15	Japan	30942	ssRNA(+)	FALSE	FALSE
LC494189.1	Coronaviridae_4	Bovine coronavirus TCG-30 RNA, complete genome	Coronaviridae	Betacoronavirus	Betacoronavirus 1		2017-12-15	Japan	30937	ssRNA(+)	FALSE	FALSE
LC494190.1	Coronaviridae_4	Bovine coronavirus TCG-31 RNA, complete genome	Coronaviridae	Betacoronavirus	Betacoronavirus 1		2017-12-15	Japan	30898	ssRNA(+)	FALSE	FALSE
LC494191.1	Coronaviridae_4	Bovine coronavirus TCG-32 RNA, complete genome	Coronaviridae	Betacoronavirus	Betacoronavirus 1		2017-12-15	Japan	30942	ssRNA(+)	FALSE	FALSE
LC494192.1	Coronaviridae_4	Bovine coronavirus TCG-33 RNA, complete genome	Coronaviridae	Betacoronavirus	Betacoronavirus 1		2017-12-15	Japan	30942	ssRNA(+)	FALSE	FALSE
LC556375.1	Coronaviridae_49	Severe acute respiratory syndrome-related coronavirus Rc-o319 RNA, complete genome	Coronaviridae	Betacoronavirus	Severe acute respiratory syndrome-related coronavirus		2013-06-01	Japan	29718	ssRNA(+)	FALSE	FALSE	Rhinolophus cornutus
LC592689.1	Coronaviridae_4	Equine coronavirus Tokyo2020 RNA, nearly complete genome	Coronaviridae	Betacoronavirus	Betacoronavirus 1		2020-06-01	Japan	30763	ssRNA(+)	FALSE	FALSE	Equus caballus
LC642814.1	Coronaviridae_4	Bovine coronavirus BoCoV GF2020 RNA, complete genome	Coronaviridae	Betacoronavirus	Betacoronavirus 1		2020-06-01	Japan	31015	ssRNA(+)	FALSE	FALSE	Bos taurus
LC654445.1	Coronaviridae_2	Human coronavirus 229E Fukushima_H829_2020 RNA, complete genome	Coronaviridae	Alphacoronavirus	Human coronavirus 229E		2020-06-01	Japan	27263	ssRNA(+)	FALSE	FALSE	Homo sapiens
LC654447.1	Coronaviridae_13	Human coronavirus HKU1 Fukushima_H815_2020 RNA, complete genome	Coronaviridae	Betacoronavirus	Human coronavirus HKU1		2020-06-01	Japan	29900	ssRNA(+)	FALSE	FALSE	Homo sapiens
LC654450.1	Coronaviridae_4	Human coronavirus OC43 Fukushima_O120_2017 RNA, complete genome	Coronaviridae	Betacoronavirus	Betacoronavirus 1		2017-06-01	Japan	30724	ssRNA(+)	FALSE	FALSE	Homo sapiens
LC654452.1	Coronaviridae_4	Human coronavirus OC43 Fukushima_H478_2018 RNA, complete genome	Coronaviridae	Betacoronavirus	Betacoronavirus 1		2018-06-01	Japan	30743	ssRNA(+)	FALSE	FALSE	Homo sapiens
LC654456.1	Coronaviridae_4	Human coronavirus OC43 Tokyo_SGH-71_2016 RNA, complete genome	Coronaviridae	Betacoronavirus	Betacoronavirus 1		2016-06-01	Japan	30737	ssRNA(+)	FALSE	FALSE	Homo sapiens
LC663783.1	Coronaviridae_50	Merbecovirus sp. Ej-CoV-3 RNA, complete genome	Coronaviridae	Betacoronavirus	Merbecovirus sp.		2015-07-04	Japan	29986	ssRNA(+)	FALSE	FALSE	Eptesicus japonensis
LC663793.1	Coronaviridae_49	Sarbecovirus sp. Rc-kw8 RNA, complete genome	Coronaviridae	Betacoronavirus	Sarbecovirus sp.	feces	2020-09-15	Japan	29718	ssRNA(+)	FALSE	FALSE	Rhinolophus cornutus
LC663958.1	Coronaviridae_49	Sarbecovirus sp. Rc-os20 RNA, complete geneome	Coronaviridae	Betacoronavirus	Sarbecovirus sp.	feces	2020-06-15	Japan	29397	ssRNA(+)	FALSE	FALSE	Rhinolophus cornutus
LC663959.1	Coronaviridae_49	Sarbecovirus sp. Rc-mk2 RNA, complete geneome	Coronaviridae	Betacoronavirus	Sarbecovirus sp.	feces	2020-09-15	Japan	29397	ssRNA(+)	FALSE	FALSE	Rhinolophus cornutus
LC687393.1	Coronaviridae_13	Human coronavirus HKU1 Fukushima_H519_2019 RNA, complete genome	Coronaviridae	Betacoronavirus	Human coronavirus HKU1	oronasopharynx	2019-06-01	Japan	29472	ssRNA(+)	FALSE	FALSE	Homo sapiens
LC687394.1	Coronaviridae_24	Human coronavirus NL63 Fukushima_H257_2018 RNA, complete genome	Coronaviridae	Alphacoronavirus	Human coronavirus NL63	oronasopharynx	2018-06-01	Japan	27563	ssRNA(+)	FALSE	FALSE	Homo sapiens
LC687396.1	Coronaviridae_24	Human coronavirus NL63 Fukushima_H552_2019 RNA, complete genome	Coronaviridae	Alphacoronavirus	Human coronavirus NL63	oronasopharynx	2019-06-01	Japan	27543	ssRNA(+)	FALSE	FALSE	Homo sapiens
LC687398.1	Coronaviridae_4	Human coronavirus OC43 Fukushima_H763_2019 RNA, complete genome	Coronaviridae	Betacoronavirus	Betacoronavirus 1	oronasopharynx	2019-06-01	Japan	30673	ssRNA(+)	FALSE	FALSE	Homo sapiens
LC687401.1	Coronaviridae_24	Human coronavirus NL63 Fukushima_OR215_2021 RNA, complete genome	Coronaviridae	Alphacoronavirus	Human coronavirus NL63	oronasopharynx	2021-06-01	Japan	27550	ssRNA(+)	FALSE	FALSE	Homo sapiens
LC706863.1	Coronaviridae_50	Merbecovirus sp. VsCoV-kj15 RNA, complete genome	Coronaviridae	Betacoronavirus	Merbecovirus sp.	feces	2021-06-15	Japan	30263	ssRNA(+)	FALSE	FALSE	Vespertilio sinensis
LC706864.1	Coronaviridae_50	Merbecovirus sp. VsCoV-a7 RNA, complete genome	Coronaviridae	Betacoronavirus	Merbecovirus sp.	feces	2016-06-01	Japan	29736	ssRNA(+)	FALSE	FALSE	Vespertilio sinensis
LC706865.1	Coronaviridae_50	Merbecovirus sp. EjCoV-3 RNA, complete genome	Coronaviridae	Betacoronavirus	Merbecovirus sp.	feces	2016-07-15	Japan	30085	ssRNA(+)	FALSE	FALSE	Eptesicus japonensis
LC710779.1	Coronaviridae_6	Avian coronavirus Beaudette-FUB RNA, complete genome	Coronaviridae	Gammacoronavirus	Avian coronavirus		2016-06-01	Germany	27608	ssRNA(+)	FALSE	FALSE	Gallus gallus
LC716900.1	Coronaviridae_6	Infectious bronchitis virus JP/Yamanashi/93 RNA, complete genome	Coronaviridae	Gammacoronavirus	Avian coronavirus		1993-06-01	Japan	27605	ssRNA(+)	FALSE	FALSE	Gallus gallus
LC716901.1	Coronaviridae_6	Infectious bronchitis virus JP/Shimane/98 RNA, complete genome	Coronaviridae	Gammacoronavirus	Avian coronavirus		1998-06-01	Japan	27643	ssRNA(+)	FALSE	FALSE	Gallus gallus
LC720427.1	Coronaviridae_4	Human coronavirus OC43 HCoVOC43_Fukushima_OR7_2020 RNA, nearly complete genome	Coronaviridae	Betacoronavirus	Betacoronavirus 1		2020-06-01	Japan	30714	ssRNA(+)	FALSE	FALSE	Homo sapiens
LC720428.1	Coronaviridae_24	Human coronavirus NL63 HCoVNL63_Fukushima_O650_2019 RNA, nearly complete genome	Coronaviridae	Alphacoronavirus	Human coronavirus NL63		2019-06-01	Japan	27529	ssRNA(+)	FALSE	FALSE	Homo sapiens
LC720429.1	Coronaviridae_4	Human coronavirus OC43 HCoVOC43_Fukushima_O989_2019 RNA, nearly complete genome	Coronaviridae	Betacoronavirus	Betacoronavirus 1		2019-06-01	Japan	30705	ssRNA(+)	FALSE	FALSE	Homo sapiens
LC742526.1	Coronaviridae_10	Feline coronavirus FCoV/I/JP15/Fe/35/2015 RNA, nearly complete genome	Coronaviridae	Alphacoronavirus	Alphacoronavirus 1		2015-08-15	Japan	28225	ssRNA(+)	FALSE	FALSE	Felis catus
LC756668.1	Coronaviridae_24	Human coronavirus NL63 HCoVNL63_Fukushima_O230_2018 RNA, nearly complete genome	Coronaviridae	Alphacoronavirus	Human coronavirus NL63		2018-06-01	Japan	27542	ssRNA(+)	FALSE	FALSE	Homo sapiens
LC756669.1	Coronaviridae_4	Human coronavirus OC43 HCoVOC43_Fukushima_OR421_2021 RNA, nearly complete genome	Coronaviridae	Betacoronavirus	Betacoronavirus 1		2021-06-01	Japan	30752	ssRNA(+)	FALSE	FALSE	Homo sapiens
LC773212.1	Coronaviridae_12	Severe acute respiratory syndrome coronavirus 2 SARS-CoV-2/human/Japan/kmumc011633/2023 RNA, nearly complete genome	Coronaviridae	Betacoronavirus	Severe acute respiratory syndrome-related coronavirus		2023-06-09	Japan	29743	ssRNA(+)	FALSE	FALSE	Homo sapiens
LR812926.1	Coronaviridae_17	Porcine epidemic diarrhea virus isolate GER/L03209/2019 genome assembly, complete genome: monopartite	Coronaviridae	Alphacoronavirus	Porcine epidemic diarrhea virus		2019-04-15	Germany	28087	ssRNA(+)	FALSE	FALSE	Sus scrofa domesticus
LR812927.1	Coronaviridae_17	Porcine epidemic diarrhea virus isolate GER/L03206/2019 genome assembly, complete genome: monopartite	Coronaviridae	Alphacoronavirus	Porcine epidemic diarrhea virus		2019-04-15	Germany	28083	ssRNA(+)	FALSE	FALSE	Sus scrofa domesticus
LR812928.1	Coronaviridae_17	Porcine epidemic diarrhea virus isolate GER/L03204/2019 genome assembly, complete genome: monopartite	Coronaviridae	Alphacoronavirus	Porcine epidemic diarrhea virus		2019-04-15	Germany	28014	ssRNA(+)	FALSE	FALSE	Sus scrofa domesticus
LR812929.1	Coronaviridae_17	Porcine epidemic diarrhea virus isolate GER/L03207/2019 genome assembly, complete genome: monopartite	Coronaviridae	Alphacoronavirus	Porcine epidemic diarrhea virus		2019-04-15	Germany	28074	ssRNA(+)	FALSE	FALSE	Sus scrofa domesticus
LR812930.1	Coronaviridae_17	Porcine epidemic diarrhea virus isolate GER/L03208/2019 genome assembly, complete genome: monopartite	Coronaviridae	Alphacoronavirus	Porcine epidemic diarrhea virus		2019-04-15	Germany	28198	ssRNA(+)	FALSE	FALSE	Sus scrofa domesticus
LR812931.1	Coronaviridae_17	Porcine epidemic diarrhea virus isolate GER/L03210/2019 genome assembly, complete genome: monopartite	Coronaviridae	Alphacoronavirus	Porcine epidemic diarrhea virus		2019-04-15	Germany	28076	ssRNA(+)	FALSE	FALSE	Sus scrofa domesticus
LR812932.1	Coronaviridae_17	Porcine epidemic diarrhea virus isolate GER/L03205/2019 genome assembly, complete genome: monopartite	Coronaviridae	Alphacoronavirus	Porcine epidemic diarrhea virus		2019-04-15	Germany	28085	ssRNA(+)	FALSE	FALSE	Sus scrofa domesticus
LT545990.1	Coronaviridae_5	Swine enteric coronavirus isolate SeCoV_GER_L00930_2012 genome assembly, complete genome: monopartite	Coronaviridae	Alphacoronavirus	Alphacoronavirus 1		2012-06-01	Germany	28050	ssRNA(+)	FALSE	FALSE	Sus scrofa
LT897799.1	Coronaviridae_17	Porcine epidemic diarrhea virus isolate PEDV_GER_L00901-V215_1978 genome assembly, complete genome: monopartite	Coronaviridae	Alphacoronavirus	Porcine epidemic diarrhea virus		1978-06-01	Germany	27998	ssRNA(+)	FALSE	FALSE	Sus scrofa
LT898408.1	Coronaviridae_17	Porcine epidemic diarrhea virus isolate PEDV_GER_L01013-K01_15-03_2015 genome assembly, complete genome: monopartite	Coronaviridae	Alphacoronavirus	Porcine epidemic diarrhea virus		2015-01-15	Germany	28029	ssRNA(+)	FALSE	FALSE	Sus scrofa
LT898409.1	Coronaviridae_17	Porcine epidemic diarrhea virus isolate PEDV_GER_L00999-K06_15-07_2015 genome assembly, complete genome: monopartite	Coronaviridae	Alphacoronavirus	Porcine epidemic diarrhea virus		2015-02-15	Germany	28006	ssRNA(+)	FALSE	FALSE	Sus scrofa
LT898410.1	Coronaviridae_17	Porcine epidemic diarrhea virus isolate PEDV_GER_L00908-K16_14-03_2014 genome assembly, complete genome: monopartite	Coronaviridae	Alphacoronavirus	Porcine epidemic diarrhea virus		2014-11-10	Germany	28029	ssRNA(+)	FALSE	FALSE	Sus scrofa
LT898411.1	Coronaviridae_17	Porcine epidemic diarrhea virus isolate PEDV_GER_L01018-K01_15-08_2015 genome assembly, complete genome: monopartite	Coronaviridae	Alphacoronavirus	Porcine epidemic diarrhea virus		2015-01-15	Germany	28030	ssRNA(+)	FALSE	FALSE	Sus scrofa
LT898412.1	Coronaviridae_17	Porcine epidemic diarrhea virus isolate PEDV_GER_L01019-K01_15-09_2015 genome assembly, complete genome: monopartite	Coronaviridae	Alphacoronavirus	Porcine epidemic diarrhea virus		2015-01-15	Germany	28030	ssRNA(+)	FALSE	FALSE	Sus scrofa
LT898413.1	Coronaviridae_17	Porcine epidemic diarrhea virus isolate PEDV_GER_L01020-K01_15-10_2015 genome assembly, complete genome: monopartite	Coronaviridae	Alphacoronavirus	Porcine epidemic diarrhea virus		2015-01-15	Germany	28030	ssRNA(+)	FALSE	FALSE	Sus scrofa
LT898414.1	Coronaviridae_17	Porcine epidemic diarrhea virus isolate PEDV_GER_L01060-K07_15-02_2015 genome assembly, complete genome: monopartite	Coronaviridae	Alphacoronavirus	Porcine epidemic diarrhea virus		2015-02-15	Germany	28026	ssRNA(+)	FALSE	FALSE	Sus scrofa
LT898415.1	Coronaviridae_17	Porcine epidemic diarrhea virus isolate PEDV_GER_L00926-K20_4-01_2014 genome assembly, complete genome: monopartite	Coronaviridae	Alphacoronavirus	Porcine epidemic diarrhea virus		2014-12-01	Germany	28029	ssRNA(+)	FALSE	FALSE	Sus scrofa
LT898416.1	Coronaviridae_17	Porcine epidemic diarrhea virus isolate PEDV_GER_L01017-K01_15-07_2015 genome assembly, complete genome: monopartite	Coronaviridae	Alphacoronavirus	Porcine epidemic diarrhea virus		2015-01-15	Germany	28013	ssRNA(+)	FALSE	FALSE	Sus scrofa
LT898417.1	Coronaviridae_17	Porcine epidemic diarrhea virus isolate PEDV_GER_L00855-K14_14-02_2014 genome assembly, complete genome: monopartite	Coronaviridae	Alphacoronavirus	Porcine epidemic diarrhea virus		2014-09-25	Germany	28023	ssRNA(+)	FALSE	FALSE	Sus scrofa
LT898418.1	Coronaviridae_17	Porcine epidemic diarrhea virus isolate PEDV_AUSTRIA_L01065-M10_15-04_2015 genome assembly, complete genome: monopartite	Coronaviridae	Alphacoronavirus	Porcine epidemic diarrhea virus		2015-06-01	Austria	28030	ssRNA(+)	FALSE	FALSE	Sus scrofa
LT898420.1	Coronaviridae_17	Porcine epidemic diarrhea virus isolate PEDV_GER_L01014-K01_15-04_2015 genome assembly, complete genome: monopartite	Coronaviridae	Alphacoronavirus	Porcine epidemic diarrhea virus		2015-01-15	Germany	28029	ssRNA(+)	FALSE	FALSE	Sus scrofa
LT898421.1	Coronaviridae_17	Porcine epidemic diarrhea virus isolate PEDV_GER_L00919-K17_14-02_2014 genome assembly, complete genome: monopartite	Coronaviridae	Alphacoronavirus	Porcine epidemic diarrhea virus		2014-11-03	Germany	27975	ssRNA(+)	FALSE	FALSE	Sus scrofa
LT898423.1	Coronaviridae_17	Porcine epidemic diarrhea virus isolate PEDV_GER_L01012-K01_15-02_2015 genome assembly, complete genome: monopartite	Coronaviridae	Alphacoronavirus	Porcine epidemic diarrhea virus		2015-01-15	Germany	28030	ssRNA(+)	FALSE	FALSE	Sus scrofa
LT898425.1	Coronaviridae_17	Porcine epidemic diarrhea virus isolate PEDV_GER_L00998-K06_15-03_2015 genome assembly, complete genome: monopartite	Coronaviridae	Alphacoronavirus	Porcine epidemic diarrhea virus		2015-02-15	Germany	28028	ssRNA(+)	FALSE	FALSE	Sus scrofa
LT898426.1	Coronaviridae_17	Porcine epidemic diarrhea virus isolate PEDV_GER_L00857-K14_14-04_2014 genome assembly, complete genome: monopartite	Coronaviridae	Alphacoronavirus	Porcine epidemic diarrhea virus		2014-09-30	Germany	28009	ssRNA(+)	FALSE	FALSE	Sus scrofa
LT898427.1	Coronaviridae_17	Porcine epidemic diarrhea virus isolate PEDV_GER_L00927-K20_14-02_2014 genome assembly, complete genome: monopartite	Coronaviridae	Alphacoronavirus	Porcine epidemic diarrhea virus		2014-12-01	Germany	28029	ssRNA(+)	FALSE	FALSE	Sus scrofa
LT898430.1	Coronaviridae_17	Porcine epidemic diarrhea virus isolate PEDV_GER_L00906-K16_14-01_2014 genome assembly, complete genome: monopartite	Coronaviridae	Alphacoronavirus	Porcine epidemic diarrhea virus		2014-11-10	Germany	28029	ssRNA(+)	FALSE	FALSE	Sus scrofa
LT898431.1	Coronaviridae_17	Porcine epidemic diarrhea virus isolate PEDV_GER_L00918-K17_14-01_2014 genome assembly, complete genome: monopartite	Coronaviridae	Alphacoronavirus	Porcine epidemic diarrhea virus		2014-11-03	Germany	27977	ssRNA(+)	FALSE	FALSE	Sus scrofa
LT898432.1	Coronaviridae_17	Porcine epidemic diarrhea virus isolate PEDV_GER_L01011-K01_15-01_2015 genome assembly, complete genome: monopartite	Coronaviridae	Alphacoronavirus	Porcine epidemic diarrhea virus		2015-01-15	Germany	28029	ssRNA(+)	FALSE	FALSE	Sus scrofa
LT898433.1	Coronaviridae_17	Porcine epidemic diarrhea virus isolate PEDV_AUSTRIA_L01063-M10_15-02_2015 genome assembly, complete genome: monopartite	Coronaviridae	Alphacoronavirus	Porcine epidemic diarrhea virus		2015-06-01	Austria	28030	ssRNA(+)	FALSE	FALSE	Sus scrofa
LT898435.1	Coronaviridae_17	Porcine epidemic diarrhea virus isolate PEDV_ROMANIA_L01330-K25_15-02_2015 genome assembly, complete genome: monopartite	Coronaviridae	Alphacoronavirus	Porcine epidemic diarrhea virus		2015-06-01	Romania	28030	ssRNA(+)	FALSE	FALSE	Sus scrofa
LT898436.1	Coronaviridae_17	Porcine epidemic diarrhea virus isolate PEDV_ROMANIA_L01329-K25_15-01_2015 genome assembly, complete genome: monopartite	Coronaviridae	Alphacoronavirus	Porcine epidemic diarrhea virus		2015-06-01	Romania	27981	ssRNA(+)	FALSE	FALSE	Sus scrofa
LT898438.1	Coronaviridae_17	Porcine epidemic diarrhea virus isolate PEDV_GER_L00932-K22_14-04_2014 genome assembly, complete genome: monopartite	Coronaviridae	Alphacoronavirus	Porcine epidemic diarrhea virus		2014-12-15	Germany	28029	ssRNA(+)	FALSE	FALSE	Sus scrofa
LT898439.1	Coronaviridae_17	Porcine epidemic diarrhea virus isolate PEDV_GER_L01059-K07_15-01_2015 genome assembly, complete genome: monopartite	Coronaviridae	Alphacoronavirus	Porcine epidemic diarrhea virus		2015-02-15	Germany	28030	ssRNA(+)	FALSE	FALSE	Sus scrofa
LT898440.1	Coronaviridae_17	Porcine epidemic diarrhea virus isolate PEDV_GER_L00931-K22_14-03_2014 genome assembly, complete genome: monopartite	Coronaviridae	Alphacoronavirus	Porcine epidemic diarrhea virus		2014-12-15	Germany	28029	ssRNA(+)	FALSE	FALSE	Sus scrofa
LT898441.1	Coronaviridae_17	Porcine epidemic diarrhea virus isolate PEDV_AUSTRIA_L01064-M10_15-03_2015 genome assembly, complete genome: monopartite	Coronaviridae	Alphacoronavirus	Porcine epidemic diarrhea virus		2015-06-01	Austria	28030	ssRNA(+)	FALSE	FALSE	Sus scrofa
LT898443.1	Coronaviridae_17	Porcine epidemic diarrhea virus isolate PEDV_GER_L01015-K01_15-05_2015 genome assembly, complete genome: monopartite	Coronaviridae	Alphacoronavirus	Porcine epidemic diarrhea virus		2015-01-15	Germany	28030	ssRNA(+)	FALSE	FALSE	Sus scrofa
LT898444.1	Coronaviridae_17	Porcine epidemic diarrhea virus isolate PEDV_GER_L01420-K06_15-04_2015 genome assembly, complete genome: monopartite	Coronaviridae	Alphacoronavirus	Porcine epidemic diarrhea virus		2015-06-01	Germany	28030	ssRNA(+)	FALSE	FALSE	Sus scrofa
LT898445.1	Coronaviridae_17	Porcine epidemic diarrhea virus isolate PEDV_GER_L00798-K11_14-02_2014 genome assembly, complete genome: monopartite	Coronaviridae	Alphacoronavirus	Porcine epidemic diarrhea virus		2014-07-16	Germany	28030	ssRNA(+)	FALSE	FALSE	Sus scrofa
LT898446.1	Coronaviridae_17	Porcine epidemic diarrhea virus isolate PEDV_GER_L00933-K22_14-05_2014 genome assembly, complete genome: monopartite	Coronaviridae	Alphacoronavirus	Porcine epidemic diarrhea virus		2014-12-15	Germany	28029	ssRNA(+)	FALSE	FALSE	Sus scrofa
LT898447.1	Coronaviridae_17	Porcine epidemic diarrhea virus isolate PEDV_GER_L00862_2014 genome assembly, complete genome: monopartite	Coronaviridae	Alphacoronavirus	Porcine epidemic diarrhea virus		2014-05-15	Germany	27995	ssRNA(+)	FALSE	FALSE	Sus scrofa
LT900498.1	Coronaviridae_17	Porcine epidemic diarrhea virus isolate PEDV_GER_L00907-K16_14-02_2014 genome assembly, complete genome: monopartite	Coronaviridae	Alphacoronavirus	Porcine epidemic diarrhea virus		2014-11-10	Germany	28029	ssRNA(+)	FALSE	FALSE	Sus scrofa
LT900499.1	Coronaviridae_17	Porcine epidemic diarrhea virus isolate PEDV/GER/L01061-K07_15-03/2015 genome assembly, complete genome: monopartite	Coronaviridae	Alphacoronavirus	Porcine epidemic diarrhea virus		2015-02-15	Germany	28030	ssRNA(+)	FALSE	FALSE	Sus scrofa
LT900500.1	Coronaviridae_17	Porcine epidemic diarrhea virus isolate PEDV_GER_L00799-K11_14-01_2014 genome assembly, complete genome: monopartite	Coronaviridae	Alphacoronavirus	Porcine epidemic diarrhea virus		2014-07-16	Germany	28028	ssRNA(+)	FALSE	FALSE	Sus scrofa
LT900501.1	Coronaviridae_17	Porcine epidemic diarrhea virus isolate PEDV_GER_L00928-K20_14-03_2014 genome assembly, complete genome: monopartite	Coronaviridae	Alphacoronavirus	Porcine epidemic diarrhea virus		2014-12-01	Germany	28029	ssRNA(+)	FALSE	FALSE	Sus scrofa
LT900502.1	Coronaviridae_17	Porcine epidemic diarrhea virus isolate PEDV_AUSTRIA_L01062-M10_15-01_2015 genome assembly, complete genome: monopartite	Coronaviridae	Alphacoronavirus	Porcine epidemic diarrhea virus		2015-06-01	Austria	28008	ssRNA(+)	FALSE	FALSE	Sus scrofa
LT905450.1	Coronaviridae_17	Porcine epidemic diarrhea virus isolate CV777 genome assembly, complete genome: monopartite	Coronaviridae	Alphacoronavirus	Porcine epidemic diarrhea virus		1977-06-01	Belgium	28026	ssRNA(+)	FALSE	FALSE	Sus scrofa
LT905451.1	Coronaviridae_17	Porcine epidemic diarrhea virus isolate CV777 genome assembly, complete genome: monopartite	Coronaviridae	Alphacoronavirus	Porcine epidemic diarrhea virus		2003-06-01	Switzerland	27945	ssRNA(+)	FALSE	FALSE	Sus scrofa
LT906581.1	Coronaviridae_17	Porcine epidemic diarrhea virus isolate CV777 genome assembly, complete genome: monopartite	Coronaviridae	Alphacoronavirus	Porcine epidemic diarrhea virus		1978-06-01	Belgium	27969	ssRNA(+)	FALSE	FALSE	Sus scrofa
LT906582.1	Coronaviridae_17	Porcine epidemic diarrhea virus isolate Br1_87 genome assembly, complete genome: monopartite	Coronaviridae	Alphacoronavirus	Porcine epidemic diarrhea virus		1987-06-01	United Kingdom	28061	ssRNA(+)	FALSE	FALSE	Sus scrofa
LT906620.1	Coronaviridae_17	Porcine epidemic diarrhea virus isolate CV777 genome assembly, complete genome: monopartite	Coronaviridae	Alphacoronavirus	Porcine epidemic diarrhea virus		1980-06-01	Belgium	28017	ssRNA(+)	FALSE	FALSE	Sus scrofa
MF000457.1	Coronaviridae_26	Middle East respiratory syndrome-related coronavirus isolate Hu/Amman-Jordan-12641/2015, complete genome	Coronaviridae	Betacoronavirus	Middle East respiratory syndrome-related coronavirus	oronasopharynx	2015-08-25	Jordan	30001	ssRNA(+)	FALSE	FALSE	Homo sapiens
MF000458.1	Coronaviridae_26	Middle East respiratory syndrome-related coronavirus isolate Hu/Amman-Jordan-13030/2015, complete genome	Coronaviridae	Betacoronavirus	Middle East respiratory syndrome-related coronavirus	oronasopharynx	2015-09-19	Jordan	30045	ssRNA(+)	FALSE	FALSE	Homo sapiens
MF000459.1	Coronaviridae_26	Middle East respiratory syndrome-related coronavirus isolate Hu/Amman-Jordan-12918/2015, complete genome	Coronaviridae	Betacoronavirus	Middle East respiratory syndrome-related coronavirus	lung, oronasopharynx	2015-09-07	Jordan	30018	ssRNA(+)	FALSE	FALSE	Homo sapiens
MF000460.1	Coronaviridae_26	Middle East respiratory syndrome-related coronavirus isolate Hu/Amman-Jordan-12716/2015, complete genome	Coronaviridae	Betacoronavirus	Middle East respiratory syndrome-related coronavirus	oronasopharynx	2015-08-30	Jordan	30045	ssRNA(+)	FALSE	FALSE	Homo sapiens
MF041982.1	Coronaviridae_18	Porcine deltacoronavirus strain SHJS/SL/2016, complete genome	Coronaviridae	Deltacoronavirus	Coronavirus HKU15		2016-12-23	China	25414	ssRNA(+)	FALSE	FALSE	Sus scrofa
MF083115.1	Coronaviridae_4	Porcine hemagglutinating encephalomyelitis virus strain CC14, complete genome	Coronaviridae	Betacoronavirus	Betacoronavirus 1	brain	2014-03-15	China	30682	ssRNA(+)	FALSE	FALSE	Sus scrofa
MF095123.1	Coronaviridae_18	Porcine deltacoronavirus isolate CHN-HG-2017, complete genome	Coronaviridae	Deltacoronavirus	Coronavirus HKU15		2017-02-15	China	25399	ssRNA(+)	FALSE	FALSE	Sus scrofa
MF113046.1	Coronaviridae_16	Alphacoronavirus Mink/China/1/2016, complete genome	Coronaviridae	Alphacoronavirus	Alphacoronavirus Mink/China/1/2016		2016-06-01	China	28924	ssRNA(+)	FALSE	FALSE	Mustela lutreola
MF167434.1	Coronaviridae_35	Porcine enteric alphacoronavirus GDS04, complete genome	Coronaviridae	Alphacoronavirus	Rhinolophus bat coronavirus HKU2		2017-03-06	China	27171	ssRNA(+)	FALSE	FALSE	Sus scrofa
MF280390.1	Coronaviridae_18	Porcine deltacoronavirus strain CHN-GD-2016, complete genome	Coronaviridae	Deltacoronavirus	Coronavirus HKU15		2016-06-01	China	25402	ssRNA(+)	FALSE	FALSE	Sus scrofa
MF281416.1	Coronaviridae_17	Porcine epidemic diarrhea virus isolate NB1, complete genome	Coronaviridae	Alphacoronavirus	Porcine epidemic diarrhea virus	feces, abdominal cavity	2017-02-21	South Korea	28005	ssRNA(+)	FALSE	FALSE	Sus scrofa
MF314143.1	Coronaviridae_4	Human coronavirus OC43 isolate HCoV-OC43/USA/ACRI_0052/2016, complete genome	Coronaviridae	Betacoronavirus	Betacoronavirus 1	oronasopharynx	2016-03-07	USA	30737	ssRNA(+)	FALSE	FALSE	Homo sapiens
MF346935.1	Coronaviridae_17	Porcine epidemic diarrhea virus isolate CH/JLDH/2016, complete genome	Coronaviridae	Alphacoronavirus	Porcine epidemic diarrhea virus	abdominal cavity	2016-07-15	China	28035	ssRNA(+)	FALSE	FALSE	Sus scrofa
MF370205.1	Coronaviridae_35	Rhinolophus bat coronavirus HKU2 isolate Swine enteric alphacoronavirus CH/GD-01/2017/P2, complete genome	Coronaviridae	Alphacoronavirus	Rhinolophus bat coronavirus HKU2	abdominal cavity	2017-06-01	China	27155	ssRNA(+)	FALSE	FALSE	Sus scrofa
MF373643.1	Coronaviridae_17	Porcine epidemic diarrhea virus, complete genome	Coronaviridae	Alphacoronavirus	Porcine epidemic diarrhea virus		2014-06-01	USA	27998	ssRNA(+)	FALSE	FALSE
MF374983.2	Coronaviridae_4	Human coronavirus OC43 isolate HCoV-OC43/USA/TCNP_0070/2016, complete genome	Coronaviridae	Betacoronavirus	Betacoronavirus 1	oronasopharynx	2016-02-01	USA	30721	ssRNA(+)	FALSE	FALSE	Homo sapiens
MF374984.1	Coronaviridae_4	Human coronavirus OC43 isolate HCoV-OC43/USA/TCNP_00204/2017, complete genome	Coronaviridae	Betacoronavirus	Betacoronavirus 1	oronasopharynx	2017-01-03	USA	30713	ssRNA(+)	FALSE	FALSE	Homo sapiens
MF374985.2	Coronaviridae_4	Human coronavirus OC43 isolate HCoV-OC43/USA/TCNP_00212/2017, complete genome	Coronaviridae	Betacoronavirus	Betacoronavirus 1	oronasopharynx	2017-01-17	USA	30705	ssRNA(+)	FALSE	FALSE	Homo sapiens
MF375374.1	Coronaviridae_17	Porcine epidemic diarrhea virus isolate CH/JXJA/2017, complete genome	Coronaviridae	Alphacoronavirus	Porcine epidemic diarrhea virus		2017-05-21	China	28079	ssRNA(+)	FALSE	FALSE	Sus scrofa
MF421319.1	Coronaviridae_6	Infectious bronchitis virus isolate UY/09/CA/01, complete genome	Coronaviridae	Gammacoronavirus	Avian coronavirus		2009-06-01	Uruguay	27647	ssRNA(+)	FALSE	FALSE	Gallus gallus
MF421320.1	Coronaviridae_6	Infectious bronchitis virus isolate UY/11/CA/18, complete genome	Coronaviridae	Gammacoronavirus	Avian coronavirus		2011-06-01	Uruguay	27634	ssRNA(+)	FALSE	FALSE	Gallus gallus
MF431742.1	Coronaviridae_18	Porcine deltacoronavirus strain GD, complete genome	Coronaviridae	Deltacoronavirus	Coronavirus HKU15	feces	2015-06-01	China	25420	ssRNA(+)	FALSE	FALSE	Sus scrofa
MF431743.1	Coronaviridae_18	Porcine deltacoronavirus strain SD, complete genome	Coronaviridae	Deltacoronavirus	Coronavirus HKU15	feces	2014-06-01	China	25414	ssRNA(+)	FALSE	FALSE	Sus scrofa
MF462814.1	Coronaviridae_17	Porcine epidemic diarrhea virus strain CH/SXYL/2016, complete genome	Coronaviridae	Alphacoronavirus	Porcine epidemic diarrhea virus		2016-09-10	China	28063	ssRNA(+)	FALSE	FALSE	Sus scrofa
MF508703.1	Coronaviridae_6	Infectious bronchitis virus isolate YX10 D90 vaccine, complete genome	Coronaviridae	Gammacoronavirus	Avian coronavirus		2013-01-01	China	27590	ssRNA(+)	FALSE	FALSE	Gallus gallus
MF593268.1	Coronaviridae_26	Middle East respiratory syndrome-related coronavirus strain Neoromicia/5038, complete genome	Coronaviridae	Betacoronavirus	Middle East respiratory syndrome-related coronavirus	feces	2015-04-20	South Africa	30009	ssRNA(+)	FALSE	FALSE	Laephotis capensis
MF593473.1	Coronaviridae_2	Camel alphacoronavirus Abu Dhabi B38, complete genome	Coronaviridae	Alphacoronavirus	Human coronavirus 229E	oronasopharynx	2015-06-01	United Arab Emirates	27389	ssRNA(+)	FALSE	FALSE	Camelus
MF598594.1	Coronaviridae_26	Middle East respiratory syndrome-related coronavirus strain camel/UAE_B1_2015, complete genome	Coronaviridae	Betacoronavirus	Middle East respiratory syndrome-related coronavirus	oronasopharynx	2015-03-15	United Arab Emirates	30123	ssRNA(+)	FALSE	FALSE	Camelus dromedarius
MF598595.1	Coronaviridae_26	Middle East respiratory syndrome-related coronavirus strain camel/UAE_B2_2015, complete genome	Coronaviridae	Betacoronavirus	Middle East respiratory syndrome-related coronavirus	oronasopharynx	2015-03-15	United Arab Emirates	30123	ssRNA(+)	FALSE	FALSE	Camelus dromedarius
MF598596.1	Coronaviridae_26	Middle East respiratory syndrome-related coronavirus strain camel/UAE_B4_2015, complete genome	Coronaviridae	Betacoronavirus	Middle East respiratory syndrome-related coronavirus	oronasopharynx	2015-03-15	United Arab Emirates	30123	ssRNA(+)	FALSE	FALSE	Camelus dromedarius
MF598597.1	Coronaviridae_26	Middle East respiratory syndrome-related coronavirus strain camel/UAE_B5_2015, complete genome	Coronaviridae	Betacoronavirus	Middle East respiratory syndrome-related coronavirus	oronasopharynx	2015-03-15	United Arab Emirates	30123	ssRNA(+)	FALSE	FALSE	Camelus dromedarius
MF598598.1	Coronaviridae_26	Middle East respiratory syndrome-related coronavirus strain camel/UAE_B6_2015, complete genome	Coronaviridae	Betacoronavirus	Middle East respiratory syndrome-related coronavirus	oronasopharynx	2015-03-15	United Arab Emirates	30123	ssRNA(+)	FALSE	FALSE	Camelus dromedarius
MF598599.1	Coronaviridae_26	Middle East respiratory syndrome-related coronavirus strain camel/UAE_B7_2015, complete genome	Coronaviridae	Betacoronavirus	Middle East respiratory syndrome-related coronavirus	oronasopharynx	2015-03-15	United Arab Emirates	30123	ssRNA(+)	FALSE	FALSE	Camelus dromedarius
MF598600.1	Coronaviridae_26	Middle East respiratory syndrome-related coronavirus strain camel/UAE_B8_2015, complete genome	Coronaviridae	Betacoronavirus	Middle East respiratory syndrome-related coronavirus	oronasopharynx	2015-03-15	United Arab Emirates	30123	ssRNA(+)	FALSE	FALSE	Camelus dromedarius
MF598601.1	Coronaviridae_26	Middle East respiratory syndrome-related coronavirus strain camel/UAE_B9_2015, complete genome	Coronaviridae	Betacoronavirus	Middle East respiratory syndrome-related coronavirus	oronasopharynx	2015-03-15	United Arab Emirates	30123	ssRNA(+)	FALSE	FALSE	Camelus dromedarius
MF598602.1	Coronaviridae_26	Middle East respiratory syndrome-related coronavirus strain camel/UAE_B10_2015, complete genome	Coronaviridae	Betacoronavirus	Middle East respiratory syndrome-related coronavirus	oronasopharynx	2015-03-15	United Arab Emirates	30123	ssRNA(+)	FALSE	FALSE	Camelus dromedarius
MF598603.1	Coronaviridae_26	Middle East respiratory syndrome-related coronavirus strain camel/UAE_B11_2015, complete genome	Coronaviridae	Betacoronavirus	Middle East respiratory syndrome-related coronavirus	oronasopharynx	2015-03-15	United Arab Emirates	30123	ssRNA(+)	FALSE	FALSE	Camelus dromedarius
MF598604.1	Coronaviridae_26	Middle East respiratory syndrome-related coronavirus strain camel/UAE_B12_2015, complete genome	Coronaviridae	Betacoronavirus	Middle East respiratory syndrome-related coronavirus	oronasopharynx	2015-03-15	United Arab Emirates	30123	ssRNA(+)	FALSE	FALSE	Camelus dromedarius
MF598605.1	Coronaviridae_26	Middle East respiratory syndrome-related coronavirus strain camel/UAE_B13_2015, complete genome	Coronaviridae	Betacoronavirus	Middle East respiratory syndrome-related coronavirus	oronasopharynx	2015-03-15	United Arab Emirates	30123	ssRNA(+)	FALSE	FALSE	Camelus dromedarius
MF598606.1	Coronaviridae_26	Middle East respiratory syndrome-related coronavirus strain camel/UAE_B14_2015, complete genome	Coronaviridae	Betacoronavirus	Middle East respiratory syndrome-related coronavirus	oronasopharynx	2015-03-15	United Arab Emirates	30123	ssRNA(+)	FALSE	FALSE	Camelus dromedarius
MF598607.1	Coronaviridae_26	Middle East respiratory syndrome-related coronavirus strain camel/UAE_B15_2015, complete genome	Coronaviridae	Betacoronavirus	Middle East respiratory syndrome-related coronavirus	oronasopharynx	2015-03-15	United Arab Emirates	30123	ssRNA(+)	FALSE	FALSE	Camelus dromedarius
MF598608.1	Coronaviridae_26	Middle East respiratory syndrome-related coronavirus strain camel/UAE_B16_2015, complete genome	Coronaviridae	Betacoronavirus	Middle East respiratory syndrome-related coronavirus	oronasopharynx	2015-03-15	United Arab Emirates	30123	ssRNA(+)	FALSE	FALSE	Camelus dromedarius
MF598609.1	Coronaviridae_26	Middle East respiratory syndrome-related coronavirus strain camel/UAE_B17_2015, complete genome	Coronaviridae	Betacoronavirus	Middle East respiratory syndrome-related coronavirus	oronasopharynx	2015-03-15	United Arab Emirates	30123	ssRNA(+)	FALSE	FALSE	Camelus dromedarius
MF598610.1	Coronaviridae_26	Middle East respiratory syndrome-related coronavirus strain camel/UAE_B18_2015, complete genome	Coronaviridae	Betacoronavirus	Middle East respiratory syndrome-related coronavirus	oronasopharynx	2015-03-15	United Arab Emirates	30123	ssRNA(+)	FALSE	FALSE	Camelus dromedarius
MF598611.1	Coronaviridae_26	Middle East respiratory syndrome-related coronavirus strain camel/UAE_B19_2015, complete genome	Coronaviridae	Betacoronavirus	Middle East respiratory syndrome-related coronavirus	oronasopharynx	2015-03-15	United Arab Emirates	30123	ssRNA(+)	FALSE	FALSE	Camelus dromedarius
MF598612.1	Coronaviridae_26	Middle East respiratory syndrome-related coronavirus strain camel/UAE_B20_2015, complete genome	Coronaviridae	Betacoronavirus	Middle East respiratory syndrome-related coronavirus	oronasopharynx	2015-03-15	United Arab Emirates	30123	ssRNA(+)	FALSE	FALSE	Camelus dromedarius
MF598613.1	Coronaviridae_26	Middle East respiratory syndrome-related coronavirus strain camel/UAE_B21_2015, complete genome	Coronaviridae	Betacoronavirus	Middle East respiratory syndrome-related coronavirus	oronasopharynx	2015-03-15	United Arab Emirates	30123	ssRNA(+)	FALSE	FALSE	Camelus dromedarius
MF598614.1	Coronaviridae_26	Middle East respiratory syndrome-related coronavirus strain camel/UAE_B22_2015, complete genome	Coronaviridae	Betacoronavirus	Middle East respiratory syndrome-related coronavirus	oronasopharynx	2015-03-15	United Arab Emirates	30123	ssRNA(+)	FALSE	FALSE	Camelus dromedarius
MF598615.1	Coronaviridae_26	Middle East respiratory syndrome-related coronavirus strain camel/UAE_B23_2015, complete genome	Coronaviridae	Betacoronavirus	Middle East respiratory syndrome-related coronavirus	oronasopharynx	2015-03-15	United Arab Emirates	30123	ssRNA(+)	FALSE	FALSE	Camelus dromedarius
MF598616.1	Coronaviridae_26	Middle East respiratory syndrome-related coronavirus strain camel/UAE_B24_2015, complete genome	Coronaviridae	Betacoronavirus	Middle East respiratory syndrome-related coronavirus	oronasopharynx	2015-03-15	United Arab Emirates	30123	ssRNA(+)	FALSE	FALSE	Camelus dromedarius
MF598617.1	Coronaviridae_26	Middle East respiratory syndrome-related coronavirus strain camel/UAE_B25_2015, complete genome	Coronaviridae	Betacoronavirus	Middle East respiratory syndrome-related coronavirus	oronasopharynx	2015-03-15	United Arab Emirates	30123	ssRNA(+)	FALSE	FALSE	Camelus dromedarius
MF598618.1	Coronaviridae_26	Middle East respiratory syndrome-related coronavirus strain camel/UAE_B26_2015, complete genome	Coronaviridae	Betacoronavirus	Middle East respiratory syndrome-related coronavirus	oronasopharynx	2015-03-15	United Arab Emirates	30123	ssRNA(+)	FALSE	FALSE	Camelus dromedarius
MF598619.1	Coronaviridae_26	Middle East respiratory syndrome-related coronavirus strain camel/UAE_B27_2015, complete genome	Coronaviridae	Betacoronavirus	Middle East respiratory syndrome-related coronavirus	oronasopharynx	2015-03-15	United Arab Emirates	30123	ssRNA(+)	FALSE	FALSE	Camelus dromedarius
MF598620.1	Coronaviridae_26	Middle East respiratory syndrome-related coronavirus strain camel/UAE_B28_2015, complete genome	Coronaviridae	Betacoronavirus	Middle East respiratory syndrome-related coronavirus	oronasopharynx	2015-03-15	United Arab Emirates	30123	ssRNA(+)	FALSE	FALSE	Camelus dromedarius
MF598621.1	Coronaviridae_26	Middle East respiratory syndrome-related coronavirus strain camel/UAE_B29_2015, complete genome	Coronaviridae	Betacoronavirus	Middle East respiratory syndrome-related coronavirus	oronasopharynx	2015-03-15	United Arab Emirates	30123	ssRNA(+)	FALSE	FALSE	Camelus dromedarius
MF598622.1	Coronaviridae_26	Middle East respiratory syndrome-related coronavirus strain camel/UAE_B30_2015, complete genome	Coronaviridae	Betacoronavirus	Middle East respiratory syndrome-related coronavirus	oronasopharynx	2015-03-15	United Arab Emirates	30123	ssRNA(+)	FALSE	FALSE	Camelus dromedarius
MF598623.1	Coronaviridae_26	Middle East respiratory syndrome-related coronavirus strain camel/UAE_B31_2015, complete genome	Coronaviridae	Betacoronavirus	Middle East respiratory syndrome-related coronavirus	oronasopharynx	2015-03-15	United Arab Emirates	30123	ssRNA(+)	FALSE	FALSE	Camelus dromedarius
MF598624.1	Coronaviridae_26	Middle East respiratory syndrome-related coronavirus strain camel/UAE_B32_2015, complete genome	Coronaviridae	Betacoronavirus	Middle East respiratory syndrome-related coronavirus	oronasopharynx	2015-03-15	United Arab Emirates	30123	ssRNA(+)	FALSE	FALSE	Camelus dromedarius
MF598625.1	Coronaviridae_26	Middle East respiratory syndrome-related coronavirus strain camel/UAE_B33_2015, complete genome	Coronaviridae	Betacoronavirus	Middle East respiratory syndrome-related coronavirus	oronasopharynx	2015-03-15	United Arab Emirates	30123	ssRNA(+)	FALSE	FALSE	Camelus dromedarius
MF598626.1	Coronaviridae_26	Middle East respiratory syndrome-related coronavirus strain camel/UAE_B34_2015, complete genome	Coronaviridae	Betacoronavirus	Middle East respiratory syndrome-related coronavirus	oronasopharynx	2015-03-15	United Arab Emirates	30123	ssRNA(+)	FALSE	FALSE	Camelus dromedarius
MF598627.1	Coronaviridae_26	Middle East respiratory syndrome-related coronavirus strain camel/UAE_B35_2015, complete genome	Coronaviridae	Betacoronavirus	Middle East respiratory syndrome-related coronavirus	oronasopharynx	2015-03-15	United Arab Emirates	30123	ssRNA(+)	FALSE	FALSE	Camelus dromedarius
MF598628.1	Coronaviridae_26	Middle East respiratory syndrome-related coronavirus strain camel/UAE_B36_2015, complete genome	Coronaviridae	Betacoronavirus	Middle East respiratory syndrome-related coronavirus	oronasopharynx	2015-03-15	United Arab Emirates	30123	ssRNA(+)	FALSE	FALSE	Camelus dromedarius
MF598629.1	Coronaviridae_26	Middle East respiratory syndrome-related coronavirus strain camel/UAE_B37_2015, complete genome	Coronaviridae	Betacoronavirus	Middle East respiratory syndrome-related coronavirus	oronasopharynx	2015-03-15	United Arab Emirates	30123	ssRNA(+)	FALSE	FALSE	Camelus dromedarius
MF598630.1	Coronaviridae_26	Middle East respiratory syndrome-related coronavirus strain camel/UAE_B38_2015, complete genome	Coronaviridae	Betacoronavirus	Middle East respiratory syndrome-related coronavirus	oronasopharynx	2015-03-15	United Arab Emirates	30123	ssRNA(+)	FALSE	FALSE	Camelus dromedarius
MF598631.1	Coronaviridae_26	Middle East respiratory syndrome-related coronavirus strain camel/UAE_B39_2015, complete genome	Coronaviridae	Betacoronavirus	Middle East respiratory syndrome-related coronavirus	oronasopharynx	2015-03-15	United Arab Emirates	30123	ssRNA(+)	FALSE	FALSE	Camelus dromedarius
MF598632.1	Coronaviridae_26	Middle East respiratory syndrome-related coronavirus strain camel/UAE_B40_2015, complete genome	Coronaviridae	Betacoronavirus	Middle East respiratory syndrome-related coronavirus	oronasopharynx	2015-03-15	United Arab Emirates	30123	ssRNA(+)	FALSE	FALSE	Camelus dromedarius
MF598633.1	Coronaviridae_26	Middle East respiratory syndrome-related coronavirus strain camel/UAE_B41_2015, complete genome	Coronaviridae	Betacoronavirus	Middle East respiratory syndrome-related coronavirus	oronasopharynx	2015-03-15	United Arab Emirates	30123	ssRNA(+)	FALSE	FALSE	Camelus dromedarius
MF598634.1	Coronaviridae_26	Middle East respiratory syndrome-related coronavirus strain camel/UAE_B42_2015, complete genome	Coronaviridae	Betacoronavirus	Middle East respiratory syndrome-related coronavirus	oronasopharynx	2015-03-15	United Arab Emirates	30123	ssRNA(+)	FALSE	FALSE	Camelus dromedarius
MF598635.1	Coronaviridae_26	Middle East respiratory syndrome-related coronavirus strain camel/UAE_B44_2015, complete genome	Coronaviridae	Betacoronavirus	Middle East respiratory syndrome-related coronavirus	oronasopharynx	2015-03-15	United Arab Emirates	30123	ssRNA(+)	FALSE	FALSE	Camelus dromedarius
MF598636.1	Coronaviridae_26	Middle East respiratory syndrome-related coronavirus strain camel/UAE_B45_2015, complete genome	Coronaviridae	Betacoronavirus	Middle East respiratory syndrome-related coronavirus	oronasopharynx	2015-03-15	United Arab Emirates	30123	ssRNA(+)	FALSE	FALSE	Camelus dromedarius
MF598637.1	Coronaviridae_26	Middle East respiratory syndrome-related coronavirus strain camel/UAE_B46_2015, complete genome	Coronaviridae	Betacoronavirus	Middle East respiratory syndrome-related coronavirus	oronasopharynx	2015-03-15	United Arab Emirates	30123	ssRNA(+)	FALSE	FALSE	Camelus dromedarius
MF598638.1	Coronaviridae_26	Middle East respiratory syndrome-related coronavirus strain camel/UAE_B47_2015, complete genome	Coronaviridae	Betacoronavirus	Middle East respiratory syndrome-related coronavirus	oronasopharynx	2015-03-15	United Arab Emirates	30123	ssRNA(+)	FALSE	FALSE	Camelus dromedarius
MF598639.1	Coronaviridae_26	Middle East respiratory syndrome-related coronavirus strain camel/UAE_B48_2015, complete genome	Coronaviridae	Betacoronavirus	Middle East respiratory syndrome-related coronavirus	oronasopharynx	2015-03-15	United Arab Emirates	30123	ssRNA(+)	FALSE	FALSE	Camelus dromedarius
MF598640.1	Coronaviridae_26	Middle East respiratory syndrome-related coronavirus strain camel/UAE_B49_2015, complete genome	Coronaviridae	Betacoronavirus	Middle East respiratory syndrome-related coronavirus	oronasopharynx	2015-03-15	United Arab Emirates	30123	ssRNA(+)	FALSE	FALSE	Camelus dromedarius
MF598641.1	Coronaviridae_26	Middle East respiratory syndrome-related coronavirus strain camel/UAE_B50_2015, complete genome	Coronaviridae	Betacoronavirus	Middle East respiratory syndrome-related coronavirus	oronasopharynx	2015-03-15	United Arab Emirates	30123	ssRNA(+)	FALSE	FALSE	Camelus dromedarius
MF598642.1	Coronaviridae_26	Middle East respiratory syndrome-related coronavirus strain camel/UAE_B51_2015, complete genome	Coronaviridae	Betacoronavirus	Middle East respiratory syndrome-related coronavirus	oronasopharynx	2015-03-15	United Arab Emirates	30123	ssRNA(+)	FALSE	FALSE	Camelus dromedarius
MF598643.1	Coronaviridae_26	Middle East respiratory syndrome-related coronavirus strain camel/UAE_B52_2015, complete genome	Coronaviridae	Betacoronavirus	Middle East respiratory syndrome-related coronavirus	oronasopharynx	2015-03-15	United Arab Emirates	30123	ssRNA(+)	FALSE	FALSE	Camelus dromedarius
MF598644.1	Coronaviridae_26	Middle East respiratory syndrome-related coronavirus strain camel/UAE_B53_2015, complete genome	Coronaviridae	Betacoronavirus	Middle East respiratory syndrome-related coronavirus	oronasopharynx	2015-03-15	United Arab Emirates	30123	ssRNA(+)	FALSE	FALSE	Camelus dromedarius
MF598645.1	Coronaviridae_26	Middle East respiratory syndrome-related coronavirus strain camel/UAE_B54_2015, complete genome	Coronaviridae	Betacoronavirus	Middle East respiratory syndrome-related coronavirus	oronasopharynx	2015-03-15	United Arab Emirates	30123	ssRNA(+)	FALSE	FALSE	Camelus dromedarius
MF598646.1	Coronaviridae_26	Middle East respiratory syndrome-related coronavirus strain camel/UAE_B55_2015, complete genome	Coronaviridae	Betacoronavirus	Middle East respiratory syndrome-related coronavirus	oronasopharynx	2015-03-15	United Arab Emirates	30123	ssRNA(+)	FALSE	FALSE	Camelus dromedarius
MF598647.1	Coronaviridae_26	Middle East respiratory syndrome-related coronavirus strain camel/UAE_B56_2015, complete genome	Coronaviridae	Betacoronavirus	Middle East respiratory syndrome-related coronavirus	oronasopharynx	2015-03-15	United Arab Emirates	30123	ssRNA(+)	FALSE	FALSE	Camelus dromedarius
MF598648.1	Coronaviridae_26	Middle East respiratory syndrome-related coronavirus strain camel/UAE_B58_2015, complete genome	Coronaviridae	Betacoronavirus	Middle East respiratory syndrome-related coronavirus	oronasopharynx	2015-03-15	United Arab Emirates	30123	ssRNA(+)	FALSE	FALSE	Camelus dromedarius
MF598649.1	Coronaviridae_26	Middle East respiratory syndrome-related coronavirus strain camel/UAE_B59_2015, complete genome	Coronaviridae	Betacoronavirus	Middle East respiratory syndrome-related coronavirus	oronasopharynx	2015-03-15	United Arab Emirates	30123	ssRNA(+)	FALSE	FALSE	Camelus dromedarius
MF598650.1	Coronaviridae_26	Middle East respiratory syndrome-related coronavirus strain camel/UAE_B60_2015, complete genome	Coronaviridae	Betacoronavirus	Middle East respiratory syndrome-related coronavirus	oronasopharynx	2015-03-15	United Arab Emirates	30123	ssRNA(+)	FALSE	FALSE	Camelus dromedarius
MF598651.1	Coronaviridae_26	Middle East respiratory syndrome-related coronavirus strain camel/UAE_B61_2015, complete genome	Coronaviridae	Betacoronavirus	Middle East respiratory syndrome-related coronavirus	oronasopharynx	2015-03-15	United Arab Emirates	30123	ssRNA(+)	FALSE	FALSE	Camelus dromedarius
MF598652.1	Coronaviridae_26	Middle East respiratory syndrome-related coronavirus strain camel/UAE_B62_2015, complete genome	Coronaviridae	Betacoronavirus	Middle East respiratory syndrome-related coronavirus	oronasopharynx	2015-03-15	United Arab Emirates	30123	ssRNA(+)	FALSE	FALSE	Camelus dromedarius
MF598653.1	Coronaviridae_26	Middle East respiratory syndrome-related coronavirus strain camel/UAE_B63_2015, complete genome	Coronaviridae	Betacoronavirus	Middle East respiratory syndrome-related coronavirus	oronasopharynx	2015-03-15	United Arab Emirates	30123	ssRNA(+)	FALSE	FALSE	Camelus dromedarius
MF598654.1	Coronaviridae_26	Middle East respiratory syndrome-related coronavirus strain camel/UAE_B64_2015, complete genome	Coronaviridae	Betacoronavirus	Middle East respiratory syndrome-related coronavirus	oronasopharynx	2015-03-15	United Arab Emirates	30123	ssRNA(+)	FALSE	FALSE	Camelus dromedarius
MF598655.1	Coronaviridae_26	Middle East respiratory syndrome-related coronavirus strain camel/UAE_B65_2015, complete genome	Coronaviridae	Betacoronavirus	Middle East respiratory syndrome-related coronavirus	oronasopharynx	2015-03-15	United Arab Emirates	30123	ssRNA(+)	FALSE	FALSE	Camelus dromedarius
MF598656.1	Coronaviridae_26	Middle East respiratory syndrome-related coronavirus strain camel/UAE_B66_2015, complete genome	Coronaviridae	Betacoronavirus	Middle East respiratory syndrome-related coronavirus	oronasopharynx	2015-03-15	United Arab Emirates	30123	ssRNA(+)	FALSE	FALSE	Camelus dromedarius
MF598657.1	Coronaviridae_26	Middle East respiratory syndrome-related coronavirus strain camel/UAE_B67_2015, complete genome	Coronaviridae	Betacoronavirus	Middle East respiratory syndrome-related coronavirus	oronasopharynx	2015-03-15	United Arab Emirates	30123	ssRNA(+)	FALSE	FALSE	Camelus dromedarius
MF598658.1	Coronaviridae_26	Middle East respiratory syndrome-related coronavirus strain camel/UAE_B68_2015, complete genome	Coronaviridae	Betacoronavirus	Middle East respiratory syndrome-related coronavirus	oronasopharynx	2015-03-15	United Arab Emirates	30123	ssRNA(+)	FALSE	FALSE	Camelus dromedarius
MF598659.1	Coronaviridae_26	Middle East respiratory syndrome-related coronavirus strain camel/UAE_B69_2015, complete genome	Coronaviridae	Betacoronavirus	Middle East respiratory syndrome-related coronavirus	oronasopharynx	2015-03-15	United Arab Emirates	30123	ssRNA(+)	FALSE	FALSE	Camelus dromedarius
MF598660.1	Coronaviridae_26	Middle East respiratory syndrome-related coronavirus strain camel/UAE_B70_2015, complete genome	Coronaviridae	Betacoronavirus	Middle East respiratory syndrome-related coronavirus	oronasopharynx	2015-03-15	United Arab Emirates	30123	ssRNA(+)	FALSE	FALSE	Camelus dromedarius
MF598661.1	Coronaviridae_26	Middle East respiratory syndrome-related coronavirus strain camel/UAE_B71_2015, complete genome	Coronaviridae	Betacoronavirus	Middle East respiratory syndrome-related coronavirus	oronasopharynx	2015-03-15	United Arab Emirates	30123	ssRNA(+)	FALSE	FALSE	Camelus dromedarius
MF598662.1	Coronaviridae_26	Middle East respiratory syndrome-related coronavirus strain camel/UAE_B72_2015, complete genome	Coronaviridae	Betacoronavirus	Middle East respiratory syndrome-related coronavirus	oronasopharynx	2015-03-15	United Arab Emirates	30123	ssRNA(+)	FALSE	FALSE	Camelus dromedarius
MF598663.1	Coronaviridae_26	Middle East respiratory syndrome-related coronavirus strain camel/UAE_B73_2015, complete genome	Coronaviridae	Betacoronavirus	Middle East respiratory syndrome-related coronavirus	oronasopharynx	2015-03-15	United Arab Emirates	30123	ssRNA(+)	FALSE	FALSE	Camelus dromedarius
MF598664.1	Coronaviridae_26	Middle East respiratory syndrome-related coronavirus strain camel/UAE_B74_2015, complete genome	Coronaviridae	Betacoronavirus	Middle East respiratory syndrome-related coronavirus	oronasopharynx	2015-03-15	United Arab Emirates	30123	ssRNA(+)	FALSE	FALSE	Camelus dromedarius
MF598665.1	Coronaviridae_26	Middle East respiratory syndrome-related coronavirus strain camel/UAE_B75_2015, complete genome	Coronaviridae	Betacoronavirus	Middle East respiratory syndrome-related coronavirus	oronasopharynx	2015-03-15	United Arab Emirates	30123	ssRNA(+)	FALSE	FALSE	Camelus dromedarius
MF598666.1	Coronaviridae_26	Middle East respiratory syndrome-related coronavirus strain camel/UAE_B76_2015, complete genome	Coronaviridae	Betacoronavirus	Middle East respiratory syndrome-related coronavirus	oronasopharynx	2015-03-15	United Arab Emirates	30123	ssRNA(+)	FALSE	FALSE	Camelus dromedarius
MF598667.1	Coronaviridae_26	Middle East respiratory syndrome-related coronavirus strain camel/UAE_B77_2015, complete genome	Coronaviridae	Betacoronavirus	Middle East respiratory syndrome-related coronavirus	oronasopharynx	2015-03-15	United Arab Emirates	30123	ssRNA(+)	FALSE	FALSE	Camelus dromedarius
MF598668.1	Coronaviridae_26	Middle East respiratory syndrome-related coronavirus strain camel/UAE_B78_2015, complete genome	Coronaviridae	Betacoronavirus	Middle East respiratory syndrome-related coronavirus	oronasopharynx	2015-03-15	United Arab Emirates	30123	ssRNA(+)	FALSE	FALSE	Camelus dromedarius
MF598669.1	Coronaviridae_26	Middle East respiratory syndrome-related coronavirus strain camel/UAE_B79_2015, complete genome	Coronaviridae	Betacoronavirus	Middle East respiratory syndrome-related coronavirus	oronasopharynx	2015-03-15	United Arab Emirates	30123	ssRNA(+)	FALSE	FALSE	Camelus dromedarius
MF598670.1	Coronaviridae_26	Middle East respiratory syndrome-related coronavirus strain camel/UAE_B80_2015, complete genome	Coronaviridae	Betacoronavirus	Middle East respiratory syndrome-related coronavirus	oronasopharynx	2015-03-15	United Arab Emirates	30123	ssRNA(+)	FALSE	FALSE	Camelus dromedarius
MF598671.1	Coronaviridae_26	Middle East respiratory syndrome-related coronavirus strain camel/UAE_B81_2015, complete genome	Coronaviridae	Betacoronavirus	Middle East respiratory syndrome-related coronavirus	oronasopharynx	2015-03-15	United Arab Emirates	30123	ssRNA(+)	FALSE	FALSE	Camelus dromedarius
MF598672.1	Coronaviridae_26	Middle East respiratory syndrome-related coronavirus strain camel/UAE_B82_2015, complete genome	Coronaviridae	Betacoronavirus	Middle East respiratory syndrome-related coronavirus	oronasopharynx	2015-03-15	United Arab Emirates	30123	ssRNA(+)	FALSE	FALSE	Camelus dromedarius
MF598673.1	Coronaviridae_26	Middle East respiratory syndrome-related coronavirus strain camel/UAE_B83_2015, complete genome	Coronaviridae	Betacoronavirus	Middle East respiratory syndrome-related coronavirus	oronasopharynx	2015-03-15	United Arab Emirates	30123	ssRNA(+)	FALSE	FALSE	Camelus dromedarius
MF598674.1	Coronaviridae_26	Middle East respiratory syndrome-related coronavirus strain camel/UAE_B84_2015, complete genome	Coronaviridae	Betacoronavirus	Middle East respiratory syndrome-related coronavirus	oronasopharynx	2015-03-15	United Arab Emirates	30123	ssRNA(+)	FALSE	FALSE	Camelus dromedarius
MF598675.1	Coronaviridae_26	Middle East respiratory syndrome-related coronavirus strain camel/UAE_B85_2015, complete genome	Coronaviridae	Betacoronavirus	Middle East respiratory syndrome-related coronavirus	oronasopharynx	2015-03-15	United Arab Emirates	30123	ssRNA(+)	FALSE	FALSE	Camelus dromedarius
MF598676.1	Coronaviridae_26	Middle East respiratory syndrome-related coronavirus strain camel/UAE_B86_2015, complete genome	Coronaviridae	Betacoronavirus	Middle East respiratory syndrome-related coronavirus	oronasopharynx	2015-03-15	United Arab Emirates	30123	ssRNA(+)	FALSE	FALSE	Camelus dromedarius
MF598677.1	Coronaviridae_26	Middle East respiratory syndrome-related coronavirus strain camel/UAE_B87_2015, complete genome	Coronaviridae	Betacoronavirus	Middle East respiratory syndrome-related coronavirus	oronasopharynx	2015-03-15	United Arab Emirates	30123	ssRNA(+)	FALSE	FALSE	Camelus dromedarius
MF598678.1	Coronaviridae_26	Middle East respiratory syndrome-related coronavirus strain camel/UAE_B88_2015, complete genome	Coronaviridae	Betacoronavirus	Middle East respiratory syndrome-related coronavirus	oronasopharynx	2015-03-15	United Arab Emirates	30123	ssRNA(+)	FALSE	FALSE	Camelus dromedarius
MF598679.1	Coronaviridae_26	Middle East respiratory syndrome-related coronavirus strain camel/UAE_B90_2015, complete genome	Coronaviridae	Betacoronavirus	Middle East respiratory syndrome-related coronavirus	oronasopharynx	2015-03-15	United Arab Emirates	30123	ssRNA(+)	FALSE	FALSE	Camelus dromedarius
MF598680.1	Coronaviridae_26	Middle East respiratory syndrome-related coronavirus strain camel/UAE_B91_2015, complete genome	Coronaviridae	Betacoronavirus	Middle East respiratory syndrome-related coronavirus	oronasopharynx	2015-03-15	United Arab Emirates	30123	ssRNA(+)	FALSE	FALSE	Camelus dromedarius
MF598681.1	Coronaviridae_26	Middle East respiratory syndrome-related coronavirus strain camel/UAE_B92_2015, complete genome	Coronaviridae	Betacoronavirus	Middle East respiratory syndrome-related coronavirus	oronasopharynx	2015-03-15	United Arab Emirates	30123	ssRNA(+)	FALSE	FALSE	Camelus dromedarius
MF598682.1	Coronaviridae_26	Middle East respiratory syndrome-related coronavirus strain camel/UAE_B93_2015, complete genome	Coronaviridae	Betacoronavirus	Middle East respiratory syndrome-related coronavirus	oronasopharynx	2015-03-15	United Arab Emirates	30123	ssRNA(+)	FALSE	FALSE	Camelus dromedarius
MF598683.1	Coronaviridae_26	Middle East respiratory syndrome-related coronavirus strain camel/UAE_B95_2015, complete genome	Coronaviridae	Betacoronavirus	Middle East respiratory syndrome-related coronavirus	oronasopharynx	2015-03-15	United Arab Emirates	30123	ssRNA(+)	FALSE	FALSE	Camelus dromedarius
MF598684.1	Coronaviridae_26	Middle East respiratory syndrome-related coronavirus strain camel/UAE_B96_2015, complete genome	Coronaviridae	Betacoronavirus	Middle East respiratory syndrome-related coronavirus	oronasopharynx	2015-03-15	United Arab Emirates	30123	ssRNA(+)	FALSE	FALSE	Camelus dromedarius
MF598685.1	Coronaviridae_26	Middle East respiratory syndrome-related coronavirus strain camel/UAE_B97_2015, complete genome	Coronaviridae	Betacoronavirus	Middle East respiratory syndrome-related coronavirus	oronasopharynx	2015-03-15	United Arab Emirates	30123	ssRNA(+)	FALSE	FALSE	Camelus dromedarius
MF598686.1	Coronaviridae_26	Middle East respiratory syndrome-related coronavirus strain camel/UAE_B99_2015, complete genome	Coronaviridae	Betacoronavirus	Middle East respiratory syndrome-related coronavirus	oronasopharynx	2015-03-15	United Arab Emirates	30123	ssRNA(+)	FALSE	FALSE	Camelus dromedarius
MF598687.1	Coronaviridae_26	Middle East respiratory syndrome-related coronavirus strain camel/UAE_B100_2015, complete genome	Coronaviridae	Betacoronavirus	Middle East respiratory syndrome-related coronavirus	oronasopharynx	2015-03-15	United Arab Emirates	30123	ssRNA(+)	FALSE	FALSE	Camelus dromedarius
MF598688.1	Coronaviridae_26	Middle East respiratory syndrome-related coronavirus strain camel/UAE_B101_2015, complete genome	Coronaviridae	Betacoronavirus	Middle East respiratory syndrome-related coronavirus	oronasopharynx	2015-03-15	United Arab Emirates	30123	ssRNA(+)	FALSE	FALSE	Camelus dromedarius
MF598689.1	Coronaviridae_26	Middle East respiratory syndrome-related coronavirus strain camel/UAE_B102_2015, complete genome	Coronaviridae	Betacoronavirus	Middle East respiratory syndrome-related coronavirus	oronasopharynx	2015-03-15	United Arab Emirates	30121	ssRNA(+)	FALSE	FALSE	Camelus dromedarius
MF598690.1	Coronaviridae_26	Middle East respiratory syndrome-related coronavirus strain camel/UAE_B103_2015, complete genome	Coronaviridae	Betacoronavirus	Middle East respiratory syndrome-related coronavirus	oronasopharynx	2015-03-15	United Arab Emirates	30123	ssRNA(+)	FALSE	FALSE	Camelus dromedarius
MF598691.1	Coronaviridae_26	Middle East respiratory syndrome-related coronavirus strain camel/UAE_B104_2015, complete genome	Coronaviridae	Betacoronavirus	Middle East respiratory syndrome-related coronavirus	oronasopharynx	2015-03-15	United Arab Emirates	30123	ssRNA(+)	FALSE	FALSE	Camelus dromedarius
MF598692.1	Coronaviridae_26	Middle East respiratory syndrome-related coronavirus strain camel/UAE_B105_2015, complete genome	Coronaviridae	Betacoronavirus	Middle East respiratory syndrome-related coronavirus	oronasopharynx	2015-03-15	United Arab Emirates	30123	ssRNA(+)	FALSE	FALSE	Camelus dromedarius
MF598693.1	Coronaviridae_26	Middle East respiratory syndrome-related coronavirus strain camel/UAE_B106_2015, complete genome	Coronaviridae	Betacoronavirus	Middle East respiratory syndrome-related coronavirus	oronasopharynx	2015-03-15	United Arab Emirates	30123	ssRNA(+)	FALSE	FALSE	Camelus dromedarius
MF598694.1	Coronaviridae_26	Middle East respiratory syndrome-related coronavirus strain camel/UAE_B107_2015, complete genome	Coronaviridae	Betacoronavirus	Middle East respiratory syndrome-related coronavirus	oronasopharynx	2015-03-15	United Arab Emirates	30123	ssRNA(+)	FALSE	FALSE	Camelus dromedarius
MF598695.1	Coronaviridae_26	Middle East respiratory syndrome-related coronavirus strain camel/UAE_B108_2015, complete genome	Coronaviridae	Betacoronavirus	Middle East respiratory syndrome-related coronavirus	oronasopharynx	2015-03-15	United Arab Emirates	30123	ssRNA(+)	FALSE	FALSE	Camelus dromedarius
MF598696.1	Coronaviridae_26	Middle East respiratory syndrome-related coronavirus strain camel/UAE_B109_2015, complete genome	Coronaviridae	Betacoronavirus	Middle East respiratory syndrome-related coronavirus	oronasopharynx	2015-03-15	United Arab Emirates	30123	ssRNA(+)	FALSE	FALSE	Camelus dromedarius
MF598697.1	Coronaviridae_26	Middle East respiratory syndrome-related coronavirus strain camel/UAE_B110_2015, complete genome	Coronaviridae	Betacoronavirus	Middle East respiratory syndrome-related coronavirus	oronasopharynx	2015-03-15	United Arab Emirates	30123	ssRNA(+)	FALSE	FALSE	Camelus dromedarius
[truncated: 51,883 more rows]
