# Supplementary material for: Crossing host boundaries: the evolutionary drivers and correlates of viral host jumps
Source: Research Square preprint supplement (doi:10.21203/rs.3.rs-3318101/v1), 2023-10-09
Supplement: Supplementary file 3 [file d55f37ed4b8073c1d73f9ccd.xlsx]

## Sheet: Supplementary Table 3a
Ancestral host	Tip host	Viral clique
Macaca mulatta	Macaca fascicularis	Adenoviridae_14
Macaca mulatta	Macaca fascicularis	Adenoviridae_14
Macaca mulatta	Papio anubis	Adenoviridae_14
Cairina moschata	Tadorna	Adenoviridae_22
Odocoileus virginianus	Odocoileus hemionus	Adenoviridae_43
Alces alces	Odocoileus virginianus	Adenoviridae_43
Odocoileus virginianus	Odocoileus hemionus columbianus	Adenoviridae_43
Odocoileus virginianus	Odocoileus hemionus	Adenoviridae_43
Alces alces	Cervus canadensis nelsoni	Adenoviridae_43
Alces alces	Cervus elaphus	Adenoviridae_43
Gorilla gorilla gorilla	Homo sapiens	Adenoviridae_5
Gorilla gorilla gorilla	Pan paniscus	Adenoviridae_5
Gorilla gorilla gorilla	Pan troglodytes	Adenoviridae_5
Gorilla gorilla gorilla	Pongo pygmaeus	Adenoviridae_5
Gallus gallus	Anatidae	Adenoviridae_53
Gallus gallus	Columbidae	Adenoviridae_7
Gallus gallus	Anatidae	Adenoviridae_7
Gallus gallus	Anatidae	Adenoviridae_7
Gallus gallus	Anatidae	Adenoviridae_7
Gallus gallus	Columbidae	Adenoviridae_7
Gallus gallus	Anatidae	Adenoviridae_7
Homo sapiens	Pan troglodytes	Adenoviridae_8
Gallus gallus	Homo sapiens	Anelloviridae_13
Homo sapiens	Felis catus	Anelloviridae_13
Felis catus	Gallus gallus	Anelloviridae_13
Felis catus	Gallus gallus	Anelloviridae_13
Felis catus	Gallus gallus	Anelloviridae_13
Gallus gallus	Felis catus	Anelloviridae_2
Gallus gallus	Felis catus	Anelloviridae_2
Gallus gallus	Canis lupus familiaris	Anelloviridae_2
Gallus gallus	Panthera leo	Anelloviridae_2
Gallus gallus	Felis catus	Anelloviridae_2
Gallus gallus	Panthera tigris altaica	Anelloviridae_2
Gallus gallus	Canis lupus familiaris	Anelloviridae_2
Gallus gallus	Canis lupus familiaris	Anelloviridae_2
Gallus gallus	Panthera tigris altaica	Anelloviridae_2
Panthera tigris altaica	Canis	Anelloviridae_2
Canis	Panthera pardus	Anelloviridae_2
Mustela putorius furo	Gallus gallus	Anelloviridae_4
Gallus gallus	Felis catus	Anelloviridae_4
Gallus gallus	Hippopotamus	Anelloviridae_4
Gallus gallus	Panthera tigris	Anelloviridae_4
Gallus gallus	Cervus nippon	Anelloviridae_4
Gallus gallus	Ardeidae	Anelloviridae_4
Panthera leo	Lophura nycthemera	Anelloviridae_4
Gallus gallus	Panthera leo	Anelloviridae_4
Gallus gallus	Pavo	Anelloviridae_4
Gallus gallus	Panthera leo	Anelloviridae_4
Gallus gallus	Serpentes	Anelloviridae_4
Canis lupus familiaris	Gallus gallus	Anelloviridae_4
Gallus gallus	Canis lupus familiaris	Anelloviridae_4
Gallus gallus	Mustela putorius furo	Anelloviridae_4
Mustela putorius furo	Felis catus	Anelloviridae_4
Leptonychotes weddellii	Stercorarius maccormicki	Anelloviridae_40
Leptonychotes weddellii	Stercorarius maccormicki	Anelloviridae_40
Leptonychotes weddellii	Stercorarius maccormicki	Anelloviridae_41
Sus scrofa domesticus	Ursus arctos	Anelloviridae_5
Felis silvestris	Felis catus	Anelloviridae_7
Felis silvestris	Felis catus	Anelloviridae_7
Boa constrictor	Acrantophis dumerili	Arenaviridae_23
Homo sapiens	Mastomys natalensis	Arenaviridae_31
Homo sapiens	Mastomys natalensis	Arenaviridae_31
Homo sapiens	Mastomys natalensis	Arenaviridae_31
Homo sapiens	Mastomys natalensis	Arenaviridae_31
Homo sapiens	Cavia porcellus	Arenaviridae_31
Homo sapiens	Lophuromys sikapusi	Arenaviridae_31
Homo sapiens	Mastomys natalensis	Arenaviridae_31
Boa constrictor	Acrantophis dumerili	Arenaviridae_40
Boa constrictor	Acrantophis dumerili	Arenaviridae_41
Boa constrictor	Acrantophis dumerili	Arenaviridae_41
Boa constrictor	Acrantophis dumerili	Arenaviridae_42
Boa constrictor	Malayopython reticulatus	Arenaviridae_44
Zygodontomys brevicauda	Homo sapiens	Arenaviridae_61
Zygodontomys brevicauda	Sigmodon alstoni	Arenaviridae_61
Zygodontomys brevicauda	Sigmodon alstoni	Arenaviridae_61
Homo sapiens	Zygodontomys brevicauda	Arenaviridae_61
Macaca mulatta	Chlorocebus aethiops	Arenaviridae_8
Chlorocebus aethiops	Callithrix jacchus	Arenaviridae_8
Chlorocebus aethiops	Callithrix jacchus	Arenaviridae_8
Macaca mulatta	Callithrix jacchus	Arenaviridae_8
Felis catus	Panthera tigris altaica	Astroviridae_19
Bos taurus	Canis lupus familiaris	Astroviridae_24
Bos taurus	Budorcas taxicolor tibetana	Astroviridae_42
Bos taurus	Canis lupus familiaris	Astroviridae_43
Bos taurus	Canis lupus familiaris	Astroviridae_43
Gallus gallus	Meleagris gallopavo	Birnaviridae_1
Oncorhynchus mykiss	Salmo salar	Birnaviridae_3
Salmo salar	Pseudophycis	Birnaviridae_3
Salmo salar	Oncorhynchus mykiss	Birnaviridae_3
Oncorhynchus mykiss	Salmo salar	Birnaviridae_3
Oncorhynchus mykiss	Salmo salar	Birnaviridae_3
Oncorhynchus mykiss	Salmo salar	Birnaviridae_3
Oncorhynchus mykiss	Salmo trutta	Birnaviridae_3
Oncorhynchus mykiss	Scophthalmus maximus	Birnaviridae_3
Scophthalmus maximus	Oncorhynchus mykiss	Birnaviridae_3
Oncorhynchus mykiss	Salvelinus	Birnaviridae_3
Oncorhynchus mykiss	Salvelinus	Birnaviridae_3
Oncorhynchus mykiss	Salvelinus alpinus	Birnaviridae_3
Oncorhynchus mykiss	Salvelinus	Birnaviridae_3
Oncorhynchus mykiss	Salmo salar	Birnaviridae_3
Oncorhynchus mykiss	Salmo trutta	Birnaviridae_3
Salmo trutta	Salvelinus	Birnaviridae_3
Salvelinus	Oncorhynchus mykiss	Birnaviridae_3
Oncorhynchus mykiss	Salvelinus	Birnaviridae_3
Oncorhynchus mykiss	Salvelinus	Birnaviridae_3
Oncorhynchus mykiss	Salmo trutta	Birnaviridae_3
Oncorhynchus mykiss	Salmo trutta	Birnaviridae_3
Oryctolagus cuniculus	Moschus chrysogaster	Caliciviridae_1
Oryctolagus cuniculus	Sylvilagus audubonii	Caliciviridae_1
Oryctolagus cuniculus	Lepus californicus	Caliciviridae_1
Oryctolagus cuniculus	Sylvilagus audubonii	Caliciviridae_1
Oryctolagus cuniculus	Lepus californicus	Caliciviridae_1
Lepus californicus	Sylvilagus audubonii	Caliciviridae_1
Oryctolagus cuniculus	Lepus californicus	Caliciviridae_1
Oryctolagus cuniculus	Lepus granatensis	Caliciviridae_1
Homo sapiens	Macaca mulatta	Caliciviridae_36
Homo sapiens	Macaca mulatta	Caliciviridae_36
Canis lupus familiaris	Sus scrofa	Circoviridae_102
Sus scrofa	Canis lupus familiaris	Circoviridae_102
Canis lupus familiaris	Bos taurus	Circoviridae_102
Sus scrofa	Mus musculus	Circoviridae_102
Sus scrofa	Mus musculus	Circoviridae_102
Sus scrofa	Equus asinus	Circoviridae_102
Sus scrofa	Bos taurus	Circoviridae_102
Sus scrofa	Vulpes vulpes	Circoviridae_102
Sus scrofa	Mus musculus	Circoviridae_102
Sus scrofa	Vulpes vulpes	Circoviridae_102
Sus scrofa	Mus musculus	Circoviridae_102
Sus scrofa	Bos taurus	Circoviridae_102
Gallus gallus	Anas platyrhynchos	Circoviridae_113
Anas platyrhynchos	Podiceps cristatus	Circoviridae_113
Anser anser	Coscoroba coscoroba	Circoviridae_16
Anser anser	Anser fabalis	Circoviridae_16
Anser anser	Anser albifrons	Circoviridae_16
Anser anser	Anas platyrhynchos	Circoviridae_16
Coscoroba coscoroba	Anser cygnoides	Circoviridae_16
Coscoroba coscoroba	Anser	Circoviridae_16
Anser anser	Coscoroba coscoroba	Circoviridae_16
Sus scrofa	Canis lupus familiaris	Circoviridae_204
Sus scrofa	Canidae	Circoviridae_204
Sus scrofa	Nyctereutes procyonoides	Circoviridae_204
Sus scrofa	Nyctereutes procyonoides	Circoviridae_204
Sus scrofa	Nyctereutes procyonoides	Circoviridae_204
Sus scrofa	Nyctereutes procyonoides	Circoviridae_204
Sus scrofa	Nyctereutes procyonoides	Circoviridae_204
Sus scrofa	Canis lupus familiaris	Circoviridae_204
Sus scrofa	Bos taurus	Circoviridae_204
Sus scrofa	Felis catus	Circoviridae_204
Sus scrofa	Bos taurus	Circoviridae_21
Anas platyrhynchos	Cairina moschata	Circoviridae_3
Cairina moschata	Anas platyrhynchos	Circoviridae_3
Cairina moschata	Anas platyrhynchos	Circoviridae_3
Cairina moschata	Anas platyrhynchos	Circoviridae_3
Anas platyrhynchos	Cairina moschata	Circoviridae_3
Cairina moschata	Anas	Circoviridae_3
Cairina moschata	Anas platyrhynchos	Circoviridae_3
Anas platyrhynchos	Melanitta fusca	Circoviridae_3
Cairina moschata	Anas	Circoviridae_3
Anas platyrhynchos	Cairina moschata	Circoviridae_3
Cairina moschata	Anas platyrhynchos	Circoviridae_3
Vulpes vulpes	Canis lupus familiaris	Circoviridae_30
Vulpes vulpes	Canis lupus	Circoviridae_30
Canis lupus familiaris	Meles meles	Circoviridae_30
Canis lupus familiaris	Felis catus	Circoviridae_30
Canis lupus familiaris	Vulpes vulpes	Circoviridae_30
Vulpes vulpes	Canis lupus	Circoviridae_30
Vulpes vulpes	Vulpes lagopus	Circoviridae_30
Melopsittacus undulatus	Psittacus erithacus	Circoviridae_4
Psittacus erithacus	Platycercus eximius	Circoviridae_4
Psittacus erithacus	Melopsittacus undulatus	Circoviridae_4
Psittacus erithacus	Platycercus elegans	Circoviridae_4
Psittacus erithacus	Psittacula krameri	Circoviridae_4
Platycercus eximius	Cyanoramphus novaezelandiae	Circoviridae_4
Psittacus erithacus	Platycercus eximius	Circoviridae_4
Platycercus eximius	Cyanoramphus novaezelandiae	Circoviridae_4
Platycercus eximius	Cyanoramphus novaezelandiae	Circoviridae_4
Platycercus eximius	Cyanoramphus novaezelandiae	Circoviridae_4
Platycercus eximius	Cyanoramphus novaezelandiae	Circoviridae_4
Platycercus eximius	Aprosmictus erythropterus	Circoviridae_4
Platycercus eximius	Calyptorhynchus lathami	Circoviridae_4
Platycercus eximius	Barbus barbus	Circoviridae_4
Platycercus elegans	Platycercus eximius	Circoviridae_4
Platycercus eximius	Platycercus elegans	Circoviridae_4
Platycercus eximius	Platycercus elegans	Circoviridae_4
Psittacus erithacus	Alisterus scapularis	Circoviridae_4
Lophochroa leadbeateri	Amazona aestiva	Circoviridae_4
Lophochroa leadbeateri	Polytelis anthopeplus	Circoviridae_4
Lophochroa leadbeateri	Calyptorhynchus banksii	Circoviridae_4
Psittacus erithacus	Lophochroa leadbeateri	Circoviridae_4
Lophochroa leadbeateri	Cacatua galerita	Circoviridae_4
Lophochroa leadbeateri	Haliaeetus leucogaster	Circoviridae_4
Lophochroa leadbeateri	Falco peregrinus	Circoviridae_4
Lophochroa leadbeateri	Eolophus roseicapilla	Circoviridae_4
Lophochroa leadbeateri	Eolophus roseicapilla	Circoviridae_4
Lophochroa leadbeateri	Cacatua sanguinea	Circoviridae_4
Lophochroa leadbeateri	Calyptorhynchus lathami	Circoviridae_4
Psittacus erithacus	Callocephalon fimbriatum	Circoviridae_4
Callocephalon fimbriatum	Eudyptula minor	Circoviridae_4
Psittacus erithacus	Neopsephotus bourkii	Circoviridae_4
Psittacus erithacus	Neophema chrysogaster	Circoviridae_4
Psittacus erithacus	Lophochroa leadbeateri	Circoviridae_4
Lophochroa leadbeateri	Cacatua sanguinea	Circoviridae_4
Cacatua sanguinea	Ninox boobook	Circoviridae_4
Psittacus erithacus	Cacatua galerita	Circoviridae_4
Cacatua galerita	Eolophus roseicapilla	Circoviridae_4
Cacatua galerita	Corvus coronoides	Circoviridae_4
Cacatua galerita	Eolophus roseicapilla	Circoviridae_4
Ara ararauna	Cacatua sulphurea	Circoviridae_4
Psittacus erithacus	Ara ararauna	Circoviridae_4
Psittacus erithacus	Trichoglossus haematodus	Circoviridae_4
Trichoglossus haematodus	Psittacidae	Circoviridae_4
Trichoglossus haematodus	Glossopsitta concinna	Circoviridae_4
Trichoglossus haematodus	Trichoglossus chlorolepidotus	Circoviridae_4
Trichoglossus haematodus	Trichoglossus chlorolepidotus	Circoviridae_4
Trichoglossus haematodus	Trichoglossus chlorolepidotus	Circoviridae_4
Trichoglossus haematodus	Trichoglossus moluccanus	Circoviridae_4
Trichoglossus haematodus	Trichoglossus moluccanus	Circoviridae_4
Trichoglossus haematodus	Aquila audax	Circoviridae_4
Trichoglossus haematodus	Ninox strenua	Circoviridae_4
Trichoglossus haematodus	Trichoglossus chlorolepidotus	Circoviridae_4
Trichoglossus haematodus	Trichoglossus chlorolepidotus	Circoviridae_4
Trichoglossus haematodus	Trichoglossus chlorolepidotus	Circoviridae_4
Trichoglossus haematodus	Dacelo novaeguineae	Circoviridae_4
Trichoglossus haematodus	Corvus coronoides	Circoviridae_4
Trichoglossus haematodus	Eos bornea	Circoviridae_4
Psittacula eupatria	Psittacus erithacus	Circoviridae_4
Ara chloropterus	Psittacula eupatria	Circoviridae_4
Psittacula eupatria	Diopsittaca nobilis	Circoviridae_4
Psittacula eupatria	Ara ambiguus	Circoviridae_4
Psittacula eupatria	Psittacus erithacus	Circoviridae_4
Psittacula eupatria	Ara severus	Circoviridae_4
Psittacula eupatria	Probosciger aterrimus	Circoviridae_4
Psittacula eupatria	Eclectus roratus	Circoviridae_4
Psittacus erithacus	Ara chloropterus	Circoviridae_4
Ara chloropterus	Eclectus roratus	Circoviridae_4
Psittacus erithacus	Cacatua sulphurea	Circoviridae_4
Psittacus erithacus	Cacatua alba	Circoviridae_4
Psittacus erithacus	Cacatua moluccensis	Circoviridae_4
Psittacus erithacus	Neophema chrysogaster	Circoviridae_4
Neophema chrysogaster	Dacelo novaeguineae	Circoviridae_4
Psittacus erithacus	Poicephalus gulielmi massaicus	Circoviridae_4
Psittacus erithacus	Poicephalus gulielmi massaicus	Circoviridae_4
Psittacus erithacus	Poicephalus robustus	Circoviridae_4
Psittacus erithacus	Melopsittacus undulatus	Circoviridae_4
Psittacus erithacus	Psittacula eupatria	Circoviridae_4
Psittacus erithacus	Poicephalus robustus	Circoviridae_4
Psittacus erithacus	Cyanoramphus auriceps	Circoviridae_4
Psittacula krameri	Alisterus scapularis	Circoviridae_4
Psittacus erithacus	Psittacula krameri	Circoviridae_4
Psittacula krameri	Melopsittacus undulatus	Circoviridae_4
Melopsittacus undulatus	Psittacula krameri	Circoviridae_4
Psittacula krameri	Psittacus erithacus	Circoviridae_4
Psittacula krameri	Amazona amazonica	Circoviridae_4
Psittacula krameri	Psittacus erithacus	Circoviridae_4
Psittacula krameri	Amazona aestiva	Circoviridae_4
Psittacula krameri	Psittacus erithacus	Circoviridae_4
Psittacula krameri	Cacatua ophthalmica	Circoviridae_4
Psittacula krameri	Poicephalus robustus	Circoviridae_4
Psittacula krameri	Amazona	Circoviridae_4
Amazona	Eclectus roratus	Circoviridae_4
Psittacus erithacus	Agapornis	Circoviridae_4
Melopsittacus undulatus	Cacatua alba	Circoviridae_4
Melopsittacus undulatus	Poicephalus robustus	Circoviridae_4
Melopsittacus undulatus	Platycercus elegans	Circoviridae_4
Melopsittacus undulatus	Psittacidae	Circoviridae_4
Melopsittacus undulatus	Psittacula krameri	Circoviridae_4
Melopsittacus undulatus	Forpus coelestis	Circoviridae_4
Psittacus erithacus	Lathamus discolor	Circoviridae_4
Psittacus erithacus	Calyptorhynchus banksii	Circoviridae_4
Calyptorhynchus banksii	Merops ornatus	Circoviridae_4
Psittacus erithacus	Barnardius zonarius semitorquatus	Circoviridae_4
Psittacus erithacus	Psephotellus dissimilis	Circoviridae_4
Psephotellus dissimilis	Psephotellus chrysopterygius	Circoviridae_4
Psittacus erithacus	Nymphicus hollandicus	Circoviridae_4
Nymphicus hollandicus	Agapornis fischeri	Circoviridae_4
Psittacus erithacus	Eclectus roratus	Circoviridae_4
Eclectus roratus	Psephotus haematonotus	Circoviridae_4
Eclectus roratus	Cyanoramphus saisseti	Circoviridae_4
Eclectus roratus	Psittacula krameri	Circoviridae_4
Psittacus erithacus	Alisterus scapularis	Circoviridae_4
Psittacus erithacus	Psittacula eupatria	Circoviridae_4
Psittacus erithacus	Poicephalus senegalus	Circoviridae_4
Poicephalus senegalus	Psittacus erithacus	Circoviridae_4
Columba livia	Gallus gallus	Circoviridae_5
Mesocricetus auratus	Homo sapiens	Coronaviridae_12
Homo sapiens	Canis lupus familiaris	Coronaviridae_12
Homo sapiens	Odocoileus virginianus	Coronaviridae_12
Homo sapiens	Mustela lutreola	Coronaviridae_12
Homo sapiens	Neogale vison	Coronaviridae_12
Homo sapiens	Felis catus	Coronaviridae_12
Homo sapiens	Odocoileus virginianus	Coronaviridae_12
Homo sapiens	Odocoileus virginianus	Coronaviridae_12
Homo sapiens	Odocoileus virginianus	Coronaviridae_12
Homo sapiens	Odocoileus virginianus	Coronaviridae_12
Homo sapiens	Felis catus	Coronaviridae_12
Homo sapiens	Odocoileus virginianus	Coronaviridae_12
Homo sapiens	Odocoileus virginianus	Coronaviridae_12
Homo sapiens	Panthera tigris	Coronaviridae_12
Homo sapiens	Odocoileus virginianus	Coronaviridae_12
Homo sapiens	Mus musculus	Coronaviridae_12
Panthera tigris	Homo sapiens	Coronaviridae_12
Homo sapiens	Panthera tigris	Coronaviridae_12
Homo sapiens	Panthera tigris	Coronaviridae_12
Homo sapiens	Panthera tigris jacksoni	Coronaviridae_12
Homo sapiens	Felis catus	Coronaviridae_12
Homo sapiens	Canis lupus	Coronaviridae_12
Homo sapiens	Felis catus	Coronaviridae_12
Homo sapiens	Neogale vison	Coronaviridae_12
Homo sapiens	Felis catus	Coronaviridae_12
Homo sapiens	Mesocricetus auratus	Coronaviridae_12
Homo sapiens	Canis lupus familiaris	Coronaviridae_12
Homo sapiens	Mustela putorius furo	Coronaviridae_12
Homo sapiens	Chlorocebus sabaeus	Coronaviridae_12
Homo sapiens	Neogale vison	Coronaviridae_12
Homo sapiens	Odocoileus virginianus	Coronaviridae_12
Homo sapiens	Odocoileus virginianus	Coronaviridae_12
Homo sapiens	Odocoileus virginianus	Coronaviridae_12
Homo sapiens	Odocoileus virginianus	Coronaviridae_12
Homo sapiens	Odocoileus virginianus	Coronaviridae_12
Panthera leo persica	Prionailurus bengalensis euptilurus	Coronaviridae_12
Panthera leo persica	Panthera tigris jacksoni	Coronaviridae_12
Homo sapiens	Panthera leo persica	Coronaviridae_12
Homo sapiens	Gorilla gorilla gorilla	Coronaviridae_12
Felis catus	Canis lupus familiaris	Coronaviridae_12
Homo sapiens	Felis catus	Coronaviridae_12
Felis catus	Canis lupus familiaris	Coronaviridae_12
Homo sapiens	Felis catus	Coronaviridae_12
Homo sapiens	Odocoileus virginianus	Coronaviridae_12
Odocoileus virginianus	Panthera tigris	Coronaviridae_12
Homo sapiens	Canis lupus familiaris	Coronaviridae_12
Homo sapiens	Odocoileus virginianus	Coronaviridae_12
Homo sapiens	Odocoileus virginianus	Coronaviridae_12
Homo sapiens	Odocoileus virginianus	Coronaviridae_12
Homo sapiens	Canis lupus familiaris	Coronaviridae_12
Homo sapiens	Felis catus	Coronaviridae_12
Homo sapiens	Canis lupus familiaris	Coronaviridae_12
Homo sapiens	Canis lupus familiaris	Coronaviridae_12
Homo sapiens	Felis catus	Coronaviridae_12
Homo sapiens	Gorilla	Coronaviridae_12
Mesocricetus auratus	Homo	Coronaviridae_12
Homo sapiens	Canis lupus	Coronaviridae_12
Homo sapiens	Odocoileus virginianus	Coronaviridae_12
Homo sapiens	Felis catus	Coronaviridae_12
Homo sapiens	Felis catus	Coronaviridae_12
Homo sapiens	Neogale vison	Coronaviridae_12
Homo sapiens	Canis lupus familiaris	Coronaviridae_12
Homo sapiens	Felis catus	Coronaviridae_12
Homo sapiens	Odocoileus virginianus	Coronaviridae_12
Homo sapiens	Canis lupus familiaris	Coronaviridae_12
Homo sapiens	Felis catus	Coronaviridae_12
Homo sapiens	Felis catus	Coronaviridae_12
Homo sapiens	Canis lupus familiaris	Coronaviridae_12
Homo sapiens	Panthera leo	Coronaviridae_12
Homo sapiens	Odocoileus virginianus	Coronaviridae_12
Homo sapiens	Odocoileus virginianus	Coronaviridae_12
Homo sapiens	Odocoileus virginianus	Coronaviridae_12
Homo sapiens	Odocoileus virginianus	Coronaviridae_12
Homo sapiens	Odocoileus virginianus	Coronaviridae_12
Homo sapiens	Odocoileus virginianus	Coronaviridae_12
Odocoileus virginianus	Homo sapiens	Coronaviridae_12
Odocoileus virginianus	Homo sapiens	Coronaviridae_12
Homo sapiens	Odocoileus virginianus	Coronaviridae_12
Homo sapiens	Canis lupus familiaris	Coronaviridae_12
Homo sapiens	Odocoileus virginianus	Coronaviridae_12
Homo sapiens	Odocoileus virginianus	Coronaviridae_12
Homo sapiens	Odocoileus virginianus	Coronaviridae_12
Homo sapiens	Canis lupus familiaris	Coronaviridae_12
Homo sapiens	Odocoileus virginianus	Coronaviridae_12
Homo sapiens	Odocoileus virginianus	Coronaviridae_12
Homo sapiens	Odocoileus virginianus	Coronaviridae_12
Homo sapiens	Odocoileus virginianus	Coronaviridae_12
Ovis aries	Sus scrofa	Coronaviridae_12
Homo sapiens	Ovis aries	Coronaviridae_12
Homo sapiens	Capra hircus	Coronaviridae_12
Capra hircus	Bos taurus	Coronaviridae_12
Homo sapiens	Panthera leo	Coronaviridae_12
Panthera leo	Crocuta crocuta	Coronaviridae_12
Homo sapiens	Odocoileus virginianus	Coronaviridae_12
Homo sapiens	Odocoileus virginianus	Coronaviridae_12
Homo sapiens	Capra hircus	Coronaviridae_12
Capra hircus	Iguania	Coronaviridae_12
Capra hircus	Ovis aries	Coronaviridae_12
Capra hircus	Iguania	Coronaviridae_12
Capra hircus	Homo sapiens	Coronaviridae_12
Homo sapiens	Capra hircus	Coronaviridae_12
Homo sapiens	Ovis aries	Coronaviridae_12
Homo sapiens	Capra hircus	Coronaviridae_12
Homo sapiens	Bos taurus	Coronaviridae_12
Capra hircus	Canis lupus	Coronaviridae_12
Capra hircus	Iguania	Coronaviridae_12
Capra hircus	Ovis aries	Coronaviridae_12
Homo sapiens	Canis lupus	Coronaviridae_12
Homo sapiens	Odocoileus virginianus	Coronaviridae_12
Homo sapiens	Odocoileus virginianus	Coronaviridae_12
Homo sapiens	Odocoileus virginianus	Coronaviridae_12
Homo sapiens	Odocoileus virginianus	Coronaviridae_12
Homo sapiens	Felis catus	Coronaviridae_12
Homo sapiens	Canis lupus familiaris	Coronaviridae_12
Canis lupus familiaris	Felis catus	Coronaviridae_12
Homo sapiens	Canis lupus familiaris	Coronaviridae_12
Homo sapiens	Odocoileus virginianus	Coronaviridae_12
Odocoileus virginianus	Homo sapiens	Coronaviridae_12
Homo sapiens	Odocoileus virginianus	Coronaviridae_12
Homo sapiens	Odocoileus virginianus	Coronaviridae_12
Homo sapiens	Cricetinae	Coronaviridae_12
Cricetinae	Homo sapiens	Coronaviridae_12
Homo sapiens	Odocoileus virginianus	Coronaviridae_12
Homo sapiens	Felis catus	Coronaviridae_12
Homo sapiens	Felis catus	Coronaviridae_12
Homo sapiens	Felis catus	Coronaviridae_12
Homo sapiens	Panthera leo persica	Coronaviridae_12
Homo sapiens	Odocoileus virginianus	Coronaviridae_12
Homo sapiens	Felis catus	Coronaviridae_12
Homo sapiens	Felis catus	Coronaviridae_12
Homo sapiens	Canis lupus familiaris	Coronaviridae_12
Homo sapiens	Felis catus	Coronaviridae_12
Homo sapiens	Panthera leo persica	Coronaviridae_12
Homo sapiens	Odocoileus virginianus	Coronaviridae_12
Homo sapiens	Panthera pardus fusca	Coronaviridae_12
Homo sapiens	Panthera leo	Coronaviridae_12
Homo sapiens	Odocoileus virginianus	Coronaviridae_12
Homo sapiens	Felis catus	Coronaviridae_12
Homo sapiens	Felis catus	Coronaviridae_12
Homo sapiens	Odocoileus virginianus	Coronaviridae_12
Homo sapiens	Felis catus	Coronaviridae_12
Felis catus	Canis lupus familiaris	Coronaviridae_12
Homo sapiens	Canis lupus familiaris	Coronaviridae_12
Homo sapiens	Odocoileus virginianus	Coronaviridae_12
Homo sapiens	Feliformia	Coronaviridae_12
Homo sapiens	Tadarida brasiliensis	Coronaviridae_12
Homo sapiens	Mustela lutreola	Coronaviridae_12
Homo sapiens	Mesocricetus auratus	Coronaviridae_12
Homo sapiens	Panthera leo	Coronaviridae_12
Homo sapiens	Mesocricetus auratus	Coronaviridae_12
Homo sapiens	Mesocricetus auratus	Coronaviridae_12
Homo sapiens	Rodentia	Coronaviridae_12
Homo sapiens	Mesocricetus auratus	Coronaviridae_12
Homo sapiens	Mustela lutreola	Coronaviridae_12
Mustela lutreola	Neogale vison	Coronaviridae_12
Homo sapiens	Felis catus	Coronaviridae_12
Homo sapiens	Chlorocebus aethiops	Coronaviridae_12
Sus scrofa	Homo sapiens	Coronaviridae_18
Sus scrofa	Homo sapiens	Coronaviridae_18
Camelus dromedarius	Vicugna pacos	Coronaviridae_2
Camelus dromedarius	Homo sapiens	Coronaviridae_26
Homo sapiens	Camelus dromedarius	Coronaviridae_26
Camelus dromedarius	Homo sapiens	Coronaviridae_26
Homo sapiens	Camelus	Coronaviridae_26
Camelus dromedarius	Homo sapiens	Coronaviridae_26
Camelus dromedarius	Homo sapiens	Coronaviridae_26
Homo sapiens	Camelus	Coronaviridae_26
Homo sapiens	Camelus dromedarius	Coronaviridae_26
Homo sapiens	Camelus dromedarius	Coronaviridae_26
Camelus	Homo sapiens	Coronaviridae_26
Homo sapiens	Camelus	Coronaviridae_26
Homo sapiens	Camelus dromedarius	Coronaviridae_26
Camelus dromedarius	Homo sapiens	Coronaviridae_26
Homo sapiens	Camelus	Coronaviridae_26
Camelus dromedarius	Homo sapiens	Coronaviridae_26
Homo sapiens	Camelus dromedarius	Coronaviridae_26
Homo sapiens	Camelus	Coronaviridae_26
Homo sapiens	Camelus dromedarius	Coronaviridae_26
Homo sapiens	Camelus dromedarius	Coronaviridae_26
Camelus dromedarius	Homo sapiens	Coronaviridae_26
Homo sapiens	Camelus	Coronaviridae_26
Camelus	Homo sapiens	Coronaviridae_26
Camelus	Homo sapiens	Coronaviridae_26
Homo sapiens	Camelus	Coronaviridae_26
Camelus	Homo sapiens	Coronaviridae_26
Homo sapiens	Camelus	Coronaviridae_26
Homo sapiens	Camelus	Coronaviridae_26
Homo sapiens	Camelus	Coronaviridae_26
Homo sapiens	Camelus dromedarius	Coronaviridae_26
Homo sapiens	Camelus	Coronaviridae_26
Homo sapiens	Camelus dromedarius	Coronaviridae_26
Camelus dromedarius	Homo sapiens	Coronaviridae_26
Camelus dromedarius	Homo sapiens	Coronaviridae_26
Homo sapiens	Camelus dromedarius	Coronaviridae_26
Camelus dromedarius	Homo sapiens	Coronaviridae_26
Homo sapiens	Camelus dromedarius	Coronaviridae_26
Camelus dromedarius	Homo sapiens	Coronaviridae_26
Camelus dromedarius	Homo sapiens	Coronaviridae_26
Homo sapiens	Camelus	Coronaviridae_26
Homo sapiens	Camelus	Coronaviridae_26
Homo sapiens	Camelus dromedarius	Coronaviridae_26
Homo sapiens	Camelus dromedarius	Coronaviridae_26
Homo sapiens	Camelus dromedarius	Coronaviridae_26
Homo sapiens	Camelus dromedarius	Coronaviridae_26
Homo sapiens	Camelus dromedarius	Coronaviridae_26
Homo sapiens	Camelus dromedarius	Coronaviridae_26
Homo sapiens	Camelus dromedarius	Coronaviridae_26
Homo sapiens	Camelus dromedarius	Coronaviridae_26
Homo sapiens	Camelus dromedarius	Coronaviridae_26
Homo sapiens	Camelus dromedarius	Coronaviridae_26
Homo sapiens	Camelus dromedarius	Coronaviridae_26
Homo sapiens	Camelus	Coronaviridae_26
Homo sapiens	Camelus dromedarius	Coronaviridae_26
Homo sapiens	Camelus	Coronaviridae_26
Homo sapiens	Camelus	Coronaviridae_26
Camelus	Homo sapiens	Coronaviridae_26
Rhinolophus sinicus	Homo sapiens	Coronaviridae_3
Rhinolophus sinicus	Chlorocebus aethiops	Coronaviridae_3
Homo sapiens	Mus musculus	Coronaviridae_3
Rhinolophus affinis	Rhinolophus sinicus	Coronaviridae_3
Rhinolophus sinicus	Rhinolophus affinis	Coronaviridae_3
Rhinolophus sinicus	Rhinolophus affinis	Coronaviridae_3
Rhinolophus affinis	Aselliscus stoliczkanus	Coronaviridae_3
Rhinolophus sinicus	Rhinolophus affinis	Coronaviridae_3
Rhinolophus sinicus	Chaerephon plicatus	Coronaviridae_3
Chaerephon plicatus	Rhinolophus stheno	Coronaviridae_3
Rhinolophus sinicus	Rhinolophus malayanus	Coronaviridae_3
Rhinolophus malayanus	Rhinolophus thomasi	Coronaviridae_3
Rhinolophus sinicus	Rhinolophus affinis	Coronaviridae_3
Rhinolophus sinicus	Rhinolophus pusillus	Coronaviridae_3
Rhinolophus sinicus	Rhinolophus ferrumequinum	Coronaviridae_3
Rhinolophus sinicus	Rhinolophus siamensis	Coronaviridae_3
Rhinolophus sinicus	Rhinolophus siamensis	Coronaviridae_3
Rhinolophus sinicus	Rhinolophus affinis	Coronaviridae_3
Rhinolophus sinicus	Rhinolophus ferrumequinum	Coronaviridae_3
Rhinolophus sinicus	Rhinolophus ferrumequinum	Coronaviridae_3
Homo sapiens	Bos taurus	Coronaviridae_4
Rusa unicolor	Kobus ellipsiprymnus	Coronaviridae_4
Bos taurus	Rusa unicolor	Coronaviridae_4
Bos taurus	Odocoileus virginianus	Coronaviridae_4
Bos taurus	Capra hircus	Coronaviridae_4
Bos taurus	Tapiridae	Coronaviridae_4
Homo sapiens	Bovidae	Coronaviridae_4
Bos taurus	Capra hircus	Coronaviridae_4
Bos taurus	Bos grunniens	Coronaviridae_4
Bos taurus	Spermophilus dauricus	Coronaviridae_4
Bos taurus	Hydropotes inermis	Coronaviridae_4
Oryctolagus cuniculus	Homo sapiens	Coronaviridae_4
Homo sapiens	Canis lupus familiaris	Coronaviridae_4
Homo sapiens	Pan troglodytes verus	Coronaviridae_4
Homo sapiens	Cricetinae	Coronaviridae_4
Homo sapiens	Sus scrofa scrofa	Coronaviridae_4
Homo sapiens	Sus scrofa	Coronaviridae_4
Oryctolagus cuniculus	Equus caballus	Coronaviridae_4
Oryctolagus cuniculus	Equus asinus	Coronaviridae_4
Homo sapiens	Bos grunniens	Coronaviridae_4
Camelus dromedarius	Camelus bactrianus	Coronaviridae_4
Bos taurus	Camelus	Coronaviridae_4
Bos taurus	Camelus dromedarius	Coronaviridae_4
Camelus dromedarius	Oryx leucoryx	Coronaviridae_4
Bos taurus	Bubalus bubalis	Coronaviridae_4
Rattus argentiventer	Rattus norvegicus	Coronaviridae_40
Rattus norvegicus	Apodemus peninsulae	Coronaviridae_40
Canis lupus familiaris	Sus scrofa	Coronaviridae_5
Canis lupus familiaris	Homo sapiens	Coronaviridae_5
Canis lupus familiaris	Nyctereutes procyonoides	Coronaviridae_5
Canis lupus familiaris	Rhizomys sinensis	Coronaviridae_5
Canis lupus familiaris	Nyctereutes procyonoides	Coronaviridae_5
Canis lupus familiaris	Felis catus	Coronaviridae_5
Felis catus	Canis lupus familiaris	Coronaviridae_5
Gallus gallus	Anatidae	Coronaviridae_6
Gallus gallus	Meleagris gallopavo	Coronaviridae_6
Meleagris gallopavo	Numididae	Coronaviridae_6
Homo sapiens	Rousettus aegyptiacus	Filoviridae_1
Rousettus aegyptiacus	Homo sapiens	Filoviridae_1
Homo sapiens	Mesocricetus auratus	Filoviridae_1
Rousettus aegyptiacus	Homo sapiens	Filoviridae_1
Sus scrofa	Macaca fascicularis	Filoviridae_6
Sus scrofa	Primates	Filoviridae_6
Macaca fascicularis	Homo sapiens	Filoviridae_6
Macaca fascicularis	Homo sapiens	Filoviridae_8
Macaca fascicularis	Homo sapiens	Filoviridae_8
Macaca fascicularis	Homo sapiens	Filoviridae_8
Anas platyrhynchos	Anser	Flaviviridae_10
Anas platyrhynchos	Gallus gallus	Flaviviridae_10
Anatidae	Gallus gallus	Flaviviridae_10
Anatidae	Gallus gallus	Flaviviridae_10
Anatidae	Gallus gallus	Flaviviridae_10
Gallus gallus	Anatidae	Flaviviridae_10
Anatidae	Passer domesticus	Flaviviridae_10
Homo sapiens	Alouatta guariba clamitans	Flaviviridae_12
Homo sapiens	Alouatta guariba clamitans	Flaviviridae_12
Homo sapiens	Alouatta	Flaviviridae_12
Homo sapiens	Alouatta guariba clamitans	Flaviviridae_12
Homo sapiens	marmosets	Flaviviridae_12
Homo sapiens	Alouatta guariba clamitans	Flaviviridae_12
Homo sapiens	Alouatta guariba clamitans	Flaviviridae_12
Alouatta guariba	Homo sapiens	Flaviviridae_12
Homo sapiens	Alouatta guariba	Flaviviridae_12
Alouatta guariba	marmosets	Flaviviridae_12
Homo sapiens	Alouatta	Flaviviridae_12
Homo sapiens	Callithrix penicillata	Flaviviridae_12
Homo sapiens	Alouatta	Flaviviridae_12
Alouatta	Homo sapiens	Flaviviridae_12
Homo sapiens	Callithrix penicillata	Flaviviridae_12
Sapajus libidinosus	Homo sapiens	Flaviviridae_12
Homo sapiens	Alouatta caraya	Flaviviridae_12
Sapajus libidinosus	Homo sapiens	Flaviviridae_12
Callicebus nigrifrons	Homo sapiens	Flaviviridae_12
Sapajus libidinosus	Alouatta guariba	Flaviviridae_12
Corvus brachyrhynchos	Pica pica	Flaviviridae_13
Pica pica	Pelecanus erythrorhynchos	Flaviviridae_13
Corvus brachyrhynchos	Cyanocitta cristata	Flaviviridae_13
Sternula antillarum	Corvus brachyrhynchos	Flaviviridae_13
Corvus brachyrhynchos	Haemorhous mexicanus	Flaviviridae_13
Cyanocitta cristata	Sternula antillarum	Flaviviridae_13
Cyanocitta cristata	Corvus brachyrhynchos	Flaviviridae_13
Cyanocitta cristata	Branta canadensis	Flaviviridae_13
Corvus brachyrhynchos	Cyanocitta cristata	Flaviviridae_13
Corvus brachyrhynchos	Passer domesticus	Flaviviridae_13
Corvus brachyrhynchos	Buteo jamaicensis	Flaviviridae_13
Corvus brachyrhynchos	Turdus migratorius	Flaviviridae_13
Corvus brachyrhynchos	Cardinalis cardinalis	Flaviviridae_13
Corvus brachyrhynchos	Pelecanus erythrorhynchos	Flaviviridae_13
Pelecanus erythrorhynchos	Larus delawarensis	Flaviviridae_13
Pelecanus erythrorhynchos	Corvus brachyrhynchos	Flaviviridae_13
Pelecanus erythrorhynchos	Buteo swainsoni	Flaviviridae_13
Pelecanus erythrorhynchos	Cyanocitta cristata	Flaviviridae_13
Pelecanus erythrorhynchos	Pelecanus occidentalis	Flaviviridae_13
Pelecanus erythrorhynchos	Sternula antillarum	Flaviviridae_13
Pelecanus erythrorhynchos	Buteo swainsoni	Flaviviridae_13
Pelecanus erythrorhynchos	Charadrius melodus	Flaviviridae_13
Pelecanus erythrorhynchos	Turdus migratorius	Flaviviridae_13
Pelecanus erythrorhynchos	Homo sapiens	Flaviviridae_13
Pelecanus erythrorhynchos	Phalacrocorax auritus	Flaviviridae_13
Pelecanus erythrorhynchos	Haliaeetus leucocephalus	Flaviviridae_13
Pelecanus erythrorhynchos	Corvus brachyrhynchos	Flaviviridae_13
Pelecanus erythrorhynchos	Sternula antillarum	Flaviviridae_13
Pelecanus erythrorhynchos	Cyanocitta cristata	Flaviviridae_13
Pelecanus erythrorhynchos	Buteo jamaicensis	Flaviviridae_13
Pelecanus erythrorhynchos	Corvus brachyrhynchos	Flaviviridae_13
Pelecanus erythrorhynchos	Cyanocitta cristata	Flaviviridae_13
Pelecanus erythrorhynchos	Loriini	Flaviviridae_13
Pelecanus erythrorhynchos	Sternula antillarum	Flaviviridae_13
Sternula antillarum	Corvus brachyrhynchos	Flaviviridae_13
Pelecanus erythrorhynchos	Cyanocitta cristata	Flaviviridae_13
Pelecanus erythrorhynchos	Corvus brachyrhynchos	Flaviviridae_13
Pelecanus erythrorhynchos	Cyanocitta cristata	Flaviviridae_13
Pelecanus erythrorhynchos	Sternula antillarum	Flaviviridae_13
Pelecanus erythrorhynchos	Homo sapiens	Flaviviridae_13
Pelecanus erythrorhynchos	Accipiter striatus	Flaviviridae_13
Corvus brachyrhynchos	Cyanocitta cristata	Flaviviridae_13
Corvus brachyrhynchos	Pelecanus erythrorhynchos	Flaviviridae_13
Corvus brachyrhynchos	Cyanocitta cristata	Flaviviridae_13
Corvus brachyrhynchos	Pelecanus erythrorhynchos	Flaviviridae_13
Corvus brachyrhynchos	Cyanocitta cristata	Flaviviridae_13
Corvus brachyrhynchos	Spinus tristis	Flaviviridae_13
Corvus brachyrhynchos	Cyanocitta cristata	Flaviviridae_13
Corvus brachyrhynchos	Cyanocitta cristata	Flaviviridae_13
Corvus brachyrhynchos	Pelecanus erythrorhynchos	Flaviviridae_13
Corvus brachyrhynchos	Cyanocitta cristata	Flaviviridae_13
Corvus brachyrhynchos	Bubo virginianus	Flaviviridae_13
Corvus brachyrhynchos	Homo sapiens	Flaviviridae_13
Corvus brachyrhynchos	Quiscalus quiscula	Flaviviridae_13
Corvus brachyrhynchos	Pelecanus erythrorhynchos	Flaviviridae_13
Corvus brachyrhynchos	Bubo virginianus	Flaviviridae_13
Corvus brachyrhynchos	Cyanocitta cristata	Flaviviridae_13
Cyanocitta cristata	Corvus brachyrhynchos	Flaviviridae_13
Cyanocitta cristata	Pelecanus erythrorhynchos	Flaviviridae_13
Cyanocitta cristata	Larus delawarensis	Flaviviridae_13
Larus delawarensis	Zenaida macroura	Flaviviridae_13
Cyanocitta cristata	Corvus brachyrhynchos	Flaviviridae_13
Cyanocitta cristata	Bubo virginianus	Flaviviridae_13
Cyanocitta cristata	Buteo jamaicensis	Flaviviridae_13
Corvus brachyrhynchos	Pelecanus erythrorhynchos	Flaviviridae_13
Corvus brachyrhynchos	Cyanocitta cristata	Flaviviridae_13
Cyanocitta cristata	Corvus brachyrhynchos	Flaviviridae_13
Corvus brachyrhynchos	Pelecanus erythrorhynchos	Flaviviridae_13
Corvus brachyrhynchos	Actitis macularius	Flaviviridae_13
Corvus brachyrhynchos	Passer domesticus	Flaviviridae_13
Corvus brachyrhynchos	Haliaeetus leucocephalus	Flaviviridae_13
Corvus brachyrhynchos	Sciurus carolinensis	Flaviviridae_13
Corvus brachyrhynchos	Cyanocitta cristata	Flaviviridae_13
Corvus brachyrhynchos	Charadrius melodus	Flaviviridae_13
Corvus brachyrhynchos	Turdus migratorius	Flaviviridae_13
Corvus brachyrhynchos	Cyanocitta cristata	Flaviviridae_13
Corvus brachyrhynchos	Pelecanus erythrorhynchos	Flaviviridae_13
Corvus brachyrhynchos	Cyanocitta cristata	Flaviviridae_13
Corvus brachyrhynchos	Bubo virginianus	Flaviviridae_13
Corvus brachyrhynchos	Cyanocitta cristata	Flaviviridae_13
Cyanocitta cristata	Spinus tristis	Flaviviridae_13
Corvus brachyrhynchos	Cyanocitta cristata	Flaviviridae_13
Corvus brachyrhynchos	Homo sapiens	Flaviviridae_13
Corvus brachyrhynchos	Baeolophus bicolor	Flaviviridae_13
Corvus brachyrhynchos	Quiscalus quiscula	Flaviviridae_13
Corvus brachyrhynchos	Turdus migratorius	Flaviviridae_13
Corvus brachyrhynchos	Cyanocitta cristata	Flaviviridae_13
Corvus brachyrhynchos	Bubo virginianus	Flaviviridae_13
Corvus brachyrhynchos	Cyanocitta cristata	Flaviviridae_13
Corvus brachyrhynchos	Cyanocitta cristata	Flaviviridae_13
Corvus brachyrhynchos	Pelecanus erythrorhynchos	Flaviviridae_13
Pelecanus erythrorhynchos	Cyanocitta cristata	Flaviviridae_13
Cyanocitta cristata	Sternula antillarum	Flaviviridae_13
Corvus brachyrhynchos	Cyanocitta cristata	Flaviviridae_13
Corvus brachyrhynchos	Cyanocitta cristata	Flaviviridae_13
Cyanocitta cristata	Mimus polyglottos	Flaviviridae_13
Corvus brachyrhynchos	Cyanocitta cristata	Flaviviridae_13
Corvus brachyrhynchos	Cyanocitta cristata	Flaviviridae_13
Corvus brachyrhynchos	Cyanocitta cristata	Flaviviridae_13
Corvus brachyrhynchos	Coragyps atratus	Flaviviridae_13
Corvus brachyrhynchos	Calidris alba	Flaviviridae_13
Corvus brachyrhynchos	Pelecanus erythrorhynchos	Flaviviridae_13
Corvus brachyrhynchos	Cyanocitta cristata	Flaviviridae_13
Corvus brachyrhynchos	Turdus migratorius	Flaviviridae_13
Turdus migratorius	Branta canadensis	Flaviviridae_13
Corvus brachyrhynchos	Cyanocitta cristata	Flaviviridae_13
Corvus brachyrhynchos	Cyanocitta cristata	Flaviviridae_13
Cyanocitta cristata	Passer domesticus	Flaviviridae_13
Corvus brachyrhynchos	Cyanocitta cristata	Flaviviridae_13
Corvus brachyrhynchos	Cyanocitta cristata	Flaviviridae_13
Corvus brachyrhynchos	Cyanocitta cristata	Flaviviridae_13
Corvus brachyrhynchos	Cyanocitta cristata	Flaviviridae_13
Corvus brachyrhynchos	Cyanocitta cristata	Flaviviridae_13
Corvus brachyrhynchos	Cyanocitta cristata	Flaviviridae_13
Corvus brachyrhynchos	Cyanocitta cristata	Flaviviridae_13
Corvus brachyrhynchos	Passer domesticus	Flaviviridae_13
Corvus brachyrhynchos	Cyanocitta cristata	Flaviviridae_13
Corvus brachyrhynchos	Cyanocitta cristata	Flaviviridae_13
Corvus brachyrhynchos	Pelecanus erythrorhynchos	Flaviviridae_13
Corvus brachyrhynchos	Cyanocitta cristata	Flaviviridae_13
Corvus brachyrhynchos	Ictinia mississippiensis	Flaviviridae_13
Corvus brachyrhynchos	Pelecanus erythrorhynchos	Flaviviridae_13
Corvus brachyrhynchos	Cyanocitta cristata	Flaviviridae_13
Branta canadensis	Buteo jamaicensis	Flaviviridae_13
Corvus brachyrhynchos	Branta canadensis	Flaviviridae_13
Corvus brachyrhynchos	Spinus tristis	Flaviviridae_13
Corvus brachyrhynchos	Cyanocitta cristata	Flaviviridae_13
Corvus brachyrhynchos	Pelecanus erythrorhynchos	Flaviviridae_13
Corvus brachyrhynchos	Cygnus buccinator	Flaviviridae_13
Corvus brachyrhynchos	Corvus ossifragus	Flaviviridae_13
Corvus brachyrhynchos	Cyanocitta cristata	Flaviviridae_13
Corvus brachyrhynchos	Asio flammeus	Flaviviridae_13
Larus delawarensis	Corvus brachyrhynchos	Flaviviridae_13
Corvus brachyrhynchos	Larus delawarensis	Flaviviridae_13
Corvus brachyrhynchos	Equus caballus	Flaviviridae_13
Corvus brachyrhynchos	Accipitridae	Flaviviridae_13
Corvus brachyrhynchos	Cyanocitta cristata	Flaviviridae_13
Corvus brachyrhynchos	Cyanocitta cristata	Flaviviridae_13
Corvus brachyrhynchos	Zenaida macroura	Flaviviridae_13
Corvus brachyrhynchos	Cyanocitta cristata	Flaviviridae_13
Corvus brachyrhynchos	Quiscalus quiscula	Flaviviridae_13
Corvus brachyrhynchos	Cyanocitta cristata	Flaviviridae_13
Corvus brachyrhynchos	Sternula	Flaviviridae_13
Corvus brachyrhynchos	Turdus migratorius	Flaviviridae_13
Corvus brachyrhynchos	Buteo jamaicensis	Flaviviridae_13
Corvus brachyrhynchos	Sciurus carolinensis	Flaviviridae_13
Corvus brachyrhynchos	Cyanocitta cristata	Flaviviridae_13
Corvus brachyrhynchos	Baeolophus bicolor	Flaviviridae_13
Corvus brachyrhynchos	Cyanocitta cristata	Flaviviridae_13
Corvus brachyrhynchos	Cyanocitta cristata	Flaviviridae_13
Corvus brachyrhynchos	Buteo jamaicensis	Flaviviridae_13
Corvus brachyrhynchos	Falco sparverius	Flaviviridae_13
Corvus brachyrhynchos	Pelecanus erythrorhynchos	Flaviviridae_13
Corvus brachyrhynchos	Pelecanus erythrorhynchos	Flaviviridae_13
Corvus brachyrhynchos	Pelecanus erythrorhynchos	Flaviviridae_13
Corvus brachyrhynchos	Cyanocitta cristata	Flaviviridae_13
Corvus brachyrhynchos	Haemorhous mexicanus	Flaviviridae_13
Corvus brachyrhynchos	Passer domesticus	Flaviviridae_13
Corvus brachyrhynchos	Euphagus cyanocephalus	Flaviviridae_13
Corvus brachyrhynchos	Cyanocitta cristata	Flaviviridae_13
Corvus brachyrhynchos	Bubo virginianus	Flaviviridae_13
Corvus brachyrhynchos	Anas platyrhynchos	Flaviviridae_13
Corvus brachyrhynchos	Cyanocitta cristata	Flaviviridae_13
Corvus brachyrhynchos	Cyanocitta cristata	Flaviviridae_13
Corvus brachyrhynchos	Pelecanus erythrorhynchos	Flaviviridae_13
Corvus brachyrhynchos	Cyanocitta cristata	Flaviviridae_13
Passer domesticus	Haemorhous mexicanus	Flaviviridae_13
Corvus brachyrhynchos	Passer domesticus	Flaviviridae_13
Corvus brachyrhynchos	Quiscalus quiscula	Flaviviridae_13
Corvus brachyrhynchos	Phalacrocorax auritus	Flaviviridae_13
Corvus brachyrhynchos	Cyanocitta cristata	Flaviviridae_13
Corvus brachyrhynchos	Cyanocitta cristata	Flaviviridae_13
Corvus brachyrhynchos	Haliaeetus leucocephalus	Flaviviridae_13
Corvus brachyrhynchos	Bubo virginianus	Flaviviridae_13
Corvus brachyrhynchos	Cyanocitta cristata	Flaviviridae_13
Corvus brachyrhynchos	Cyanocitta cristata	Flaviviridae_13
Corvus brachyrhynchos	Pelecanus erythrorhynchos	Flaviviridae_13
Corvus brachyrhynchos	Cyanocitta cristata	Flaviviridae_13
Corvus brachyrhynchos	Cyanocitta cristata	Flaviviridae_13
Corvus brachyrhynchos	Cyanocitta cristata	Flaviviridae_13
Corvus brachyrhynchos	Equus caballus	Flaviviridae_13
Corvus brachyrhynchos	Cyanocitta cristata	Flaviviridae_13
Cyanocitta cristata	Bubo virginianus	Flaviviridae_13
Corvus brachyrhynchos	Pelecanus erythrorhynchos	Flaviviridae_13
Corvus brachyrhynchos	Haemorhous mexicanus	Flaviviridae_13
Phalacrocorax auritus	Cyanocitta cristata	Flaviviridae_13
Phalacrocorax auritus	Pelecanus erythrorhynchos	Flaviviridae_13
Corvus brachyrhynchos	Phalacrocorax auritus	Flaviviridae_13
Corvus brachyrhynchos	Cyanocitta cristata	Flaviviridae_13
Corvus brachyrhynchos	Bubo virginianus	Flaviviridae_13
Corvus brachyrhynchos	Cyanocitta cristata	Flaviviridae_13
Corvus brachyrhynchos	Cyanocitta cristata	Flaviviridae_13
Corvus brachyrhynchos	Accipiter cooperii	Flaviviridae_13
Corvus brachyrhynchos	Cyanocitta cristata	Flaviviridae_13
Corvus brachyrhynchos	Cyanocitta cristata	Flaviviridae_13
Corvus brachyrhynchos	Pelecanus erythrorhynchos	Flaviviridae_13
Corvus brachyrhynchos	Pica hudsonia	Flaviviridae_13
Corvus brachyrhynchos	Cyanocitta cristata	Flaviviridae_13
Corvus brachyrhynchos	Pelecanus erythrorhynchos	Flaviviridae_13
Corvus brachyrhynchos	Pelecanus erythrorhynchos	Flaviviridae_13
Corvus brachyrhynchos	Mimus polyglottos	Flaviviridae_13
Corvus brachyrhynchos	Cyanocitta cristata	Flaviviridae_13
Corvus brachyrhynchos	Pelecanus erythrorhynchos	Flaviviridae_13
Cyanocitta cristata	Corvus brachyrhynchos	Flaviviridae_13
Corvus brachyrhynchos	Pelecanus erythrorhynchos	Flaviviridae_13
Corvus brachyrhynchos	Sternula	Flaviviridae_13
Sternula	Pelecanus erythrorhynchos	Flaviviridae_13
Corvus brachyrhynchos	Accipiter gentilis	Flaviviridae_13
Corvus brachyrhynchos	Cyanocitta cristata	Flaviviridae_13
Corvus brachyrhynchos	Pelecanus	Flaviviridae_13
Passer domesticus	Accipiter gentilis	Flaviviridae_13
Corvus brachyrhynchos	Passer domesticus	Flaviviridae_13
Corvus brachyrhynchos	Cardinalis cardinalis	Flaviviridae_13
Corvus brachyrhynchos	Cyanocitta cristata	Flaviviridae_13
Corvus brachyrhynchos	Cyanocitta cristata	Flaviviridae_13
Corvus brachyrhynchos	Loriini	Flaviviridae_13
Corvus brachyrhynchos	Pica pica	Flaviviridae_13
Pica pica	Pelecanus erythrorhynchos	Flaviviridae_13
Corvus brachyrhynchos	Turdus migratorius	Flaviviridae_13
Corvus brachyrhynchos	Falco sparverius	Flaviviridae_13
Corvus brachyrhynchos	Buteo jamaicensis	Flaviviridae_13
Corvus brachyrhynchos	Turdus migratorius	Flaviviridae_13
Corvus brachyrhynchos	Passer domesticus	Flaviviridae_13
Corvus brachyrhynchos	Cyanocitta cristata	Flaviviridae_13
Corvus brachyrhynchos	Corvus ossifragus	Flaviviridae_13
Corvus brachyrhynchos	Falco sparverius	Flaviviridae_13
Corvus brachyrhynchos	Buteo jamaicensis	Flaviviridae_13
Corvus brachyrhynchos	Buteo jamaicensis	Flaviviridae_13
Corvus brachyrhynchos	Mimus	Flaviviridae_13
Corvus brachyrhynchos	Cyanocitta cristata	Flaviviridae_13
Corvus brachyrhynchos	Cyanocitta cristata	Flaviviridae_13
Corvus brachyrhynchos	Bubo virginianus	Flaviviridae_13
Corvus brachyrhynchos	Cyanocitta cristata	Flaviviridae_13
Corvus brachyrhynchos	Cyanocitta cristata	Flaviviridae_13
Corvus brachyrhynchos	Bubo virginianus	Flaviviridae_13
Corvus brachyrhynchos	Falco	Flaviviridae_13
Corvus brachyrhynchos	Cyanocitta cristata	Flaviviridae_13
Corvus brachyrhynchos	Sturnidae	Flaviviridae_13
Corvus brachyrhynchos	Cyanocitta cristata	Flaviviridae_13
Corvus brachyrhynchos	Pelecanus erythrorhynchos	Flaviviridae_13
Corvus brachyrhynchos	Equus caballus	Flaviviridae_13
Corvus brachyrhynchos	Cyanocitta cristata	Flaviviridae_13
Corvus brachyrhynchos	Equus caballus	Flaviviridae_13
Corvidae	Homo sapiens	Flaviviridae_13
Pica pica	Garrulus glandarius	Flaviviridae_13
Garrulus glandarius	Egretta garzetta	Flaviviridae_13
Pica pica	Athene noctua	Flaviviridae_13
Rousettus leschenaultii	Homo sapiens	Flaviviridae_13
Corvus brachyrhynchos	Cyanocitta cristata	Flaviviridae_13
Phoenicopterus roseus	Mus musculus	Flaviviridae_13
Corvus brachyrhynchos	Phoenicopterus roseus	Flaviviridae_13
Corvus brachyrhynchos	Cyanocitta cristata	Flaviviridae_13
Corvus brachyrhynchos	Equus caballus	Flaviviridae_13
Corvus brachyrhynchos	Cyanocitta cristata	Flaviviridae_13
Corvus brachyrhynchos	Quiscalus quiscula	Flaviviridae_13
Corvus brachyrhynchos	Passer domesticus	Flaviviridae_13
Corvus brachyrhynchos	Cyanocitta cristata	Flaviviridae_13
Corvus brachyrhynchos	Passer domesticus	Flaviviridae_13
Corvus brachyrhynchos	Sciurus carolinensis	Flaviviridae_13
Corvus brachyrhynchos	Cyanocitta cristata	Flaviviridae_13
Corvus brachyrhynchos	Cyanocitta cristata	Flaviviridae_13
Ondatra zibethicus	Alexandromys oeconomus	Flaviviridae_167
Homo sapiens	Turdus merula	Flaviviridae_18
Turdus merula	Homo sapiens	Flaviviridae_18
Turdus merula	Parus major	Flaviviridae_18
Turdus merula	Strix nebulosa	Flaviviridae_18
Turdus merula	Turdus philomelos	Flaviviridae_18
Turdus merula	Strix nebulosa	Flaviviridae_18
Pipistrellus pipistrellus	Turdus merula	Flaviviridae_18
Turdus merula	Pipistrellus pipistrellus	Flaviviridae_18
Turdus merula	Strix nebulosa	Flaviviridae_18
Turdus merula	Sturnus vulgaris	Flaviviridae_18
Turdus merula	Passer domesticus	Flaviviridae_18
Turdus merula	Strix nebulosa	Flaviviridae_18
Turdus merula	Strix nebulosa	Flaviviridae_18
Turdus merula	Turdus pilaris	Flaviviridae_18
Turdus merula	Strix nebulosa	Flaviviridae_18
Turdus merula	Homo sapiens	Flaviviridae_18
Turdus merula	Asio otus	Flaviviridae_18
Turdus merula	Strix nebulosa	Flaviviridae_18
Larus crassirostris	Mergus squamatus	Flaviviridae_18
Strix nebulosa	Larus crassirostris	Flaviviridae_18
Turdus merula	Strix nebulosa	Flaviviridae_18
Turdus merula	Melanitta nigra	Flaviviridae_18
Homo sapiens	Mastomys natalensis	Flaviviridae_18
Mastomys natalensis	Crocidura	Flaviviridae_18
Mastomys natalensis	Rattus rattus	Flaviviridae_18
Homo sapiens	Strix nebulosa	Flaviviridae_18
Strix nebulosa	Turdus merula	Flaviviridae_18
Strix nebulosa	Bubo scandiacus	Flaviviridae_18
Aves	Homo sapiens	Flaviviridae_19
Aves	Equus caballus	Flaviviridae_19
Accipiter gentilis	Homo sapiens	Flaviviridae_19
Homo sapiens	Gallus gallus	Flaviviridae_19
Homo sapiens	Columbidae	Flaviviridae_19
Homo sapiens	Canis lupus familiaris	Flaviviridae_19
Homo sapiens	Equus caballus	Flaviviridae_19
Accipiter gentilis	Parus major	Flaviviridae_19
Parus major	Accipiter gentilis	Flaviviridae_19
Parus major	Equus caballus	Flaviviridae_19
Accipiter gentilis	Homo sapiens	Flaviviridae_19
Accipiter gentilis	Homo sapiens	Flaviviridae_19
Accipiter gentilis	Homo sapiens	Flaviviridae_19
Accipiter gentilis	Cyanistes caeruleus	Flaviviridae_19
Accipiter gentilis	Lathamus discolor	Flaviviridae_19
Accipiter gentilis	Bombycilla garrulus	Flaviviridae_19
Accipiter gentilis	Parus major	Flaviviridae_19
Accipiter gentilis	Garrulus glandarius	Flaviviridae_19
Accipiter gentilis	Turdus merula	Flaviviridae_19
Accipiter gentilis	Cyanistes caeruleus	Flaviviridae_19
Accipiter gentilis	Prunella modularis	Flaviviridae_19
Accipiter gentilis	Larus crassirostris	Flaviviridae_19
Larus crassirostris	Mergus squamatus	Flaviviridae_19
Larus crassirostris	Phoenicopterus ruber	Flaviviridae_19
Larus crassirostris	Phoenicopterus chilensis	Flaviviridae_19
Larus crassirostris	Accipiter gentilis	Flaviviridae_19
Accipiter gentilis	Bubo scandiacus	Flaviviridae_19
Accipiter gentilis	Cyanistes caeruleus	Flaviviridae_19
Accipiter gentilis	Corvus cornix	Flaviviridae_19
Accipiter gentilis	Phoenicopterus	Flaviviridae_19
Phoenicopterus	Accipiter gentilis	Flaviviridae_19
Accipiter gentilis	Cyanistes caeruleus	Flaviviridae_19
Accipiter gentilis	Bubo scandiacus	Flaviviridae_19
Accipiter gentilis	Phoenicoparrus andinus	Flaviviridae_19
Accipiter gentilis	Serinus canaria	Flaviviridae_19
Serinus canaria	Passer	Flaviviridae_19
Serinus canaria	Bubo scandiacus	Flaviviridae_19
Accipiter gentilis	Bubo scandiacus	Flaviviridae_19
Bubo scandiacus	Phoenicopterus	Flaviviridae_19
Accipiter gentilis	Cyanistes caeruleus	Flaviviridae_19
Accipiter gentilis	Bubo scandiacus	Flaviviridae_19
Accipiter gentilis	Athene noctua	Flaviviridae_19
Accipiter gentilis	Strix aluco	Flaviviridae_19
Strix aluco	Pyrrhocorax graculus	Flaviviridae_19
Accipiter gentilis	Cyanistes caeruleus	Flaviviridae_19
Accipiter gentilis	Phoenicopterus	Flaviviridae_19
Accipiter gentilis	Phoenicopterus chilensis	Flaviviridae_19
Turdus merula	Strix nebulosa	Flaviviridae_19
Accipiter gentilis	Turdus merula	Flaviviridae_19
Accipiter gentilis	Phoenicopterus chilensis	Flaviviridae_19
Accipiter gentilis	Equus caballus	Flaviviridae_19
Accipiter gentilis	Strix nebulosa	Flaviviridae_19
Accipiter gentilis	Trichoglossus haematodus	Flaviviridae_19
Accipiter gentilis	Homo sapiens	Flaviviridae_19
Accipiter gentilis	Equus ferus	Flaviviridae_19
Accipiter gentilis	Cyanistes caeruleus	Flaviviridae_19
Passer domesticus	Turdus merula	Flaviviridae_19
Accipiter gentilis	Passer domesticus	Flaviviridae_19
Accipiter gentilis	Passer domesticus	Flaviviridae_19
Accipiter gentilis	Phoenicopterus	Flaviviridae_19
Accipiter gentilis	Cyanistes caeruleus	Flaviviridae_19
Accipiter gentilis	Bubo scandiacus	Flaviviridae_19
Bubo scandiacus	Athene noctua	Flaviviridae_19
Accipiter gentilis	Parus major	Flaviviridae_19
Accipiter gentilis	Homo sapiens	Flaviviridae_19
Accipiter gentilis	Bubo scandiacus	Flaviviridae_19
Accipiter gentilis	Buteo	Flaviviridae_19
Accipiter gentilis	Phoenicopterus chilensis	Flaviviridae_19
Accipiter gentilis	Bubo scandiacus	Flaviviridae_19
Bubo scandiacus	Strix nebulosa	Flaviviridae_19
Accipiter gentilis	Strix nebulosa	Flaviviridae_19
Accipiter gentilis	Nestor notabilis	Flaviviridae_19
Accipiter gentilis	Homo sapiens	Flaviviridae_19
Homo sapiens	Accipiter gentilis	Flaviviridae_19
Homo sapiens	Pica pica	Flaviviridae_19
Pica pica	Athene noctua	Flaviviridae_19
Homo sapiens	Passer domesticus	Flaviviridae_19
Buteo buteo	Accipiter gentilis	Flaviviridae_19
Homo sapiens	Buteo buteo	Flaviviridae_19
Accipiter gentilis	Homo sapiens	Flaviviridae_19
Accipiter gentilis	Nestor notabilis	Flaviviridae_19
Falco	Pluvialis apricaria	Flaviviridae_19
Pluvialis apricaria	Equus caballus	Flaviviridae_19
Equus caballus	Homo sapiens	Flaviviridae_19
Accipiter gentilis	Accipiter nisus	Flaviviridae_19
Meleagris gallopavo	Alectoris rufa	Flaviviridae_25
Meleagris gallopavo	Lophophorus impejanus	Flaviviridae_25
Bos taurus	Capra hircus	Flaviviridae_28
Bos taurus	Sus scrofa	Flaviviridae_32
Ovis aries	Homo sapiens	Flaviviridae_35
Ovis aries	Lagopus lagopus scotica	Flaviviridae_35
Ovis aries	Canis lupus familiaris	Flaviviridae_35
Ovis aries	Sus scrofa domesticus	Flaviviridae_35
Sus scrofa	Mus musculus	Flaviviridae_4
Sus scrofa	Homo sapiens	Flaviviridae_4
Rousettus leschenaultii	Murina aurata	Flaviviridae_4
Myotis ricketti	Scotophilus kuhlii	Flaviviridae_4
Homo sapiens	Equus caballus	Flaviviridae_4
Sus scrofa domesticus	Bos taurus	Flaviviridae_4
Homo sapiens	Sus scrofa	Flaviviridae_4
Sus scrofa	Homo sapiens	Flaviviridae_4
Bos taurus	Cervidae	Flaviviridae_56
Homo sapiens	Apodemus speciosus	Flaviviridae_7
Marmota himalayana	Homo sapiens	Flaviviridae_7
Marmota himalayana	Mus	Flaviviridae_7
Marmota himalayana	Myodes rufocanus	Flaviviridae_7
Homo sapiens	Ochotona alpina	Flaviviridae_7
Homo sapiens	Pinicola enucleator	Flaviviridae_7
Microtus maximowiczii	Dendrocopos major	Flaviviridae_7
Microtus maximowiczii	Homo sapiens	Flaviviridae_7
Microtus maximowiczii	Poecile montanus	Flaviviridae_7
Homo sapiens	Sorex araneus	Flaviviridae_7
Bos taurus	Bison bison	Flaviviridae_73
Bos taurus	Bos grunniens	Flaviviridae_73
Acanthis flammea	Heloderma suspectum	Genomoviridae_21
Acanthis flammea	Phylloscopus	Genomoviridae_21
Phylloscopus	Capreolus pygargus	Genomoviridae_21
Canis lupus familiaris	Fringilla montifringilla	Genomoviridae_21
Canis lupus familiaris	Emberiza chrysophrys	Genomoviridae_21
Bubalus bubalis	Canis lupus familiaris	Genomoviridae_21
Canis lupus familiaris	Coccothraustes coccothraustes	Genomoviridae_21
Canis lupus familiaris	Pteropus tonganus	Genomoviridae_40
Phoenicopteridae	Canis lupus familiaris	Genomoviridae_40
Phoenicopteridae	Sus scrofa domesticus	Genomoviridae_40
Canis lupus familiaris	Larvivora sibilans	Genomoviridae_40
Marmota flaviventris	Canis lupus familiaris	Genomoviridae_53
Tadarida brasiliensis	Peromyscus truei	Genomoviridae_81
Lepus americanus	Alces alces	Genomoviridae_81
Lepus americanus	Tadarida brasiliensis	Genomoviridae_81
Felis catus	Canis lupus familiaris	Hepadnaviridae_10
Crocidura attenuata	Anourosorex squamipes	Hepadnaviridae_11
Crocidura attenuata	Anourosorex squamipes	Hepadnaviridae_11
Anatidae	Eudromia elegans	Hepadnaviridae_2
Psittacula krameri	Psittacus erithacus	Hepadnaviridae_3
Psittacula krameri	Psittacula eupatria	Hepadnaviridae_3
Rhinolophus pusillus	Miniopterus schreibersii	Hepadnaviridae_5
Miniopterus schreibersii	Rhinolophus sinicus	Hepadnaviridae_5
Rhinolophus sinicus	Rhinolophus pearsonii	Hepadnaviridae_5
Rhinolophus pearsonii	Rhinolophus pusillus	Hepadnaviridae_5
Rhinolophus sinicus	Rhinolophus monoceros	Hepadnaviridae_5
Rhinolophus monoceros	Rhinolophus macrotis	Hepadnaviridae_5
Rhinolophus monoceros	Rhinolophus pusillus	Hepadnaviridae_5
Rhinolophus monoceros	Myotis chinensis	Hepadnaviridae_5
Rhinolophus pusillus	Rhinolophus luctus	Hepadnaviridae_5
Rhinolophus pusillus	Rhinolophus monoceros	Hepadnaviridae_5
Rhinolophus pusillus	Rhinolophus monoceros	Hepadnaviridae_5
Rhinolophus pusillus	Rhinolophus ferrumequinum	Hepadnaviridae_5
Miniopterus schreibersii	Myotis davidii	Hepadnaviridae_5
Miniopterus schreibersii	Rhinolophus pusillus	Hepadnaviridae_5
Miniopterus schreibersii	Rhinolophus pearsonii	Hepadnaviridae_5
Homo sapiens	Sus scrofa	Hepeviridae_1
Homo sapiens	Sus scrofa	Hepeviridae_1
Homo sapiens	Canis	Hepeviridae_1
Oryctolagus cuniculus	Homo sapiens	Hepeviridae_10
Oryctolagus cuniculus	Homo sapiens	Hepeviridae_10
Homo sapiens	Rattus tanezumi	Hepeviridae_12
Homo sapiens	Rattus	Hepeviridae_12
Homo sapiens	Rattus norvegicus	Hepeviridae_12
Rattus norvegicus	Rattus rattus	Hepeviridae_12
Rattus norvegicus	Rattus rattus	Hepeviridae_12
Rattus norvegicus	Rattus rattus	Hepeviridae_14
Rattus norvegicus	Rattus rattus	Hepeviridae_14
Rattus norvegicus	Homo sapiens	Hepeviridae_14
Soricidae	Niviventer niviventer	Hepeviridae_14
Rattus norvegicus	Soricidae	Hepeviridae_14
Sus scrofa	Homo sapiens	Hepeviridae_18
Sus scrofa	Homo sapiens	Hepeviridae_18
Sus scrofa	Homo sapiens	Hepeviridae_18
Homo sapiens	Sus scrofa	Hepeviridae_2
Homo sapiens	Sus scrofa	Hepeviridae_2
Sus scrofa	Homo sapiens	Hepeviridae_2
Homo sapiens	Sus scrofa	Hepeviridae_2
Homo sapiens	Sus scrofa	Hepeviridae_2
Homo sapiens	Sus scrofa	Hepeviridae_2
Homo sapiens	Hystrix cristata	Hepeviridae_2
Homo sapiens	Cervus nippon	Hepeviridae_3
Homo sapiens	Urva javanica	Hepeviridae_3
Homo sapiens	Sus scrofa	Hepeviridae_3
Homo sapiens	Sus scrofa	Hepeviridae_3
Homo sapiens	Sus scrofa domesticus	Hepeviridae_3
Homo sapiens	Sus scrofa	Hepeviridae_3
Homo sapiens	Urva javanica	Hepeviridae_3
Homo sapiens	Sus scrofa	Hepeviridae_3
Homo sapiens	Sus scrofa	Hepeviridae_3
Homo sapiens	Sus scrofa	Hepeviridae_3
Homo sapiens	Sus scrofa	Hepeviridae_3
Homo sapiens	Sus scrofa	Hepeviridae_3
Homo sapiens	Sus scrofa	Hepeviridae_3
Homo sapiens	Sus scrofa	Hepeviridae_3
Homo sapiens	Sus scrofa	Hepeviridae_4
Sus scrofa	Bos grunniens	Hepeviridae_4
Capra hircus	Tupaia glis	Hepeviridae_4
Sus scrofa	Capra hircus	Hepeviridae_4
Capra hircus	Bos taurus	Hepeviridae_4
Capra hircus	Bos taurus	Hepeviridae_4
Capra hircus	Homo sapiens	Hepeviridae_4
Capra hircus	Macaca mulatta	Hepeviridae_4
Sus scrofa	Homo sapiens	Hepeviridae_4
Sus scrofa	Homo sapiens	Hepeviridae_4
Homo sapiens	Sus scrofa	Hepeviridae_4
Sus scrofa	Homo sapiens	Hepeviridae_6
Sus scrofa	Homo sapiens	Hepeviridae_6
Sus scrofa	Homo sapiens	Hepeviridae_6
Sus scrofa	Homo sapiens	Hepeviridae_6
Sus scrofa	Homo sapiens	Hepeviridae_6
Homo sapiens	Chlorocebus sabaeus	Herpesviridae_17
Bos taurus	Bos indicus	Herpesviridae_31
Sus scrofa	Canis lupus familiaris	Herpesviridae_4
Sus scrofa	Procyon lotor	Herpesviridae_4
Sus scrofa	Panthera tigris	Herpesviridae_4
Panthera tigris	Mustela lutreola	Herpesviridae_4
Sus scrofa	Homo sapiens	Herpesviridae_4
Sus scrofa	Bos taurus	Herpesviridae_4
Sus scrofa	Hystricidae	Herpesviridae_4
Gallus gallus	Anser indicus	Orthomyxoviridae_1
Anatidae	Gallus gallus	Orthomyxoviridae_1
Gallus gallus	Corvus frugilegus	Orthomyxoviridae_1
Gallus gallus	Larus canus	Orthomyxoviridae_1
Gallus gallus	Falco cherrug	Orthomyxoviridae_1
Gallus gallus	Anatidae	Orthomyxoviridae_1
Gallus gallus	Anatidae	Orthomyxoviridae_1
Gallus gallus	Sus scrofa	Orthomyxoviridae_1
Gallus gallus	Corvidae	Orthomyxoviridae_1
Columbidae	Chroicocephalus brunnicephalus	Orthomyxoviridae_1
Columbidae	Lophura leucomelanos	Orthomyxoviridae_1
Columbidae	Homo sapiens	Orthomyxoviridae_1
Gallus gallus	Columbidae	Orthomyxoviridae_1
Gallus gallus	Anatidae	Orthomyxoviridae_1
Anatidae	Gallus gallus	Orthomyxoviridae_1
Gallus gallus	Anatidae	Orthomyxoviridae_1
Gallus gallus	Columbidae	Orthomyxoviridae_1
Gallus gallus	Anatidae	Orthomyxoviridae_1
Anatidae	Homo sapiens	Orthomyxoviridae_1
Gallus gallus	Cairina moschata	Orthomyxoviridae_1
Cairina moschata	Homo sapiens	Orthomyxoviridae_1
Anatidae	Gallus gallus	Orthomyxoviridae_1
Anatidae	Gallus gallus	Orthomyxoviridae_1
Anatidae	Gallus gallus	Orthomyxoviridae_1
Anatidae	Gallus gallus	Orthomyxoviridae_1
Anatidae	Homo sapiens	Orthomyxoviridae_1
Anatidae	Ardeidae	Orthomyxoviridae_1
Anatidae	Accipitriformes	Orthomyxoviridae_1
Homo sapiens	Anatidae	Orthomyxoviridae_1
Anatidae	Gallus gallus	Orthomyxoviridae_1
Gallus gallus	Columba livia	Orthomyxoviridae_1
Anatidae	Gallus gallus	Orthomyxoviridae_1
Gallus gallus	Anatidae	Orthomyxoviridae_1
Gallus gallus	Sus scrofa	Orthomyxoviridae_1
Gallus gallus	Anatidae	Orthomyxoviridae_1
Gallus gallus	Anatidae	Orthomyxoviridae_1
Anatidae	Galliformes	Orthomyxoviridae_1
Gallus gallus	Columbidae	Orthomyxoviridae_1
Gallus gallus	Streptopelia	Orthomyxoviridae_1
Gallus gallus	Anas crecca	Orthomyxoviridae_1
Gallus gallus	Anatidae	Orthomyxoviridae_1
Gallus gallus	Cairina moschata	Orthomyxoviridae_1
Gallus gallus	Columbidae	Orthomyxoviridae_1
Gallus gallus	Anatidae	Orthomyxoviridae_1
Gallus gallus	Parus major	Orthomyxoviridae_1
Gallus gallus	Anas platyrhynchos	Orthomyxoviridae_1
Gallus gallus	Columbidae	Orthomyxoviridae_1
Gallus gallus	Homo sapiens	Orthomyxoviridae_1
Gallus gallus	Columbidae	Orthomyxoviridae_1
Gallus gallus	Grus virgo	Orthomyxoviridae_1
Gallus gallus	Fringilla montifringilla	Orthomyxoviridae_1
Gallus gallus	Columbidae	Orthomyxoviridae_1
Columbidae	Galliformes	Orthomyxoviridae_1
Gallus gallus	Anatidae	Orthomyxoviridae_1
Gallus gallus	Homo sapiens	Orthomyxoviridae_1
Gallus gallus	Homo sapiens	Orthomyxoviridae_1
Gallus gallus	Passer montanus	Orthomyxoviridae_1
Gallus gallus	Homo sapiens	Orthomyxoviridae_1
Gallus gallus	Anatidae	Orthomyxoviridae_1
Gallus gallus	Columbidae	Orthomyxoviridae_1
Columbidae	Gallus gallus	Orthomyxoviridae_1
Gallus gallus	Homo sapiens	Orthomyxoviridae_1
Gallus gallus	Anatidae	Orthomyxoviridae_1
Gallus gallus	Anatidae	Orthomyxoviridae_1
Gallus gallus	Homo sapiens	Orthomyxoviridae_1
Gallus gallus	Anatidae	Orthomyxoviridae_1
Gallus gallus	Homo sapiens	Orthomyxoviridae_1
Gallus gallus	Homo sapiens	Orthomyxoviridae_1
Gallus gallus	Homo sapiens	Orthomyxoviridae_1
Gallus gallus	Mustela lutreola	Orthomyxoviridae_1
Gallus gallus	Anatidae	Orthomyxoviridae_1
Gallus gallus	Anatidae	Orthomyxoviridae_1
Anatidae	Sus scrofa	Orthomyxoviridae_1
Sus scrofa	Gallus gallus	Orthomyxoviridae_1
Homo sapiens	Anas platyrhynchos	Orthomyxoviridae_1
Anatidae	Gallus gallus	Orthomyxoviridae_1
Anatidae	Gallus gallus	Orthomyxoviridae_1
Anatidae	Gallus gallus	Orthomyxoviridae_1
Anatidae	Gallus gallus	Orthomyxoviridae_1
Anatidae	Columbidae	Orthomyxoviridae_1
Anatidae	Gallus gallus	Orthomyxoviridae_1
Anatidae	Gallus gallus	Orthomyxoviridae_1
Gallus gallus	Anatidae	Orthomyxoviridae_1
Gallus gallus	Anatidae	Orthomyxoviridae_1
Anatidae	Gallus gallus	Orthomyxoviridae_1
Homo sapiens	Cairina moschata	Orthomyxoviridae_1
Gallus gallus	Anatidae	Orthomyxoviridae_1
Anatidae	Gallus gallus	Orthomyxoviridae_1
Gallus gallus	Anas platyrhynchos	Orthomyxoviridae_1
Gallus gallus	Anatidae	Orthomyxoviridae_1
Gallus gallus	Columbidae	Orthomyxoviridae_1
Gallus gallus	Otis tarda	Orthomyxoviridae_1
Gallus gallus	Anatidae	Orthomyxoviridae_1
Anatidae	Gallus gallus	Orthomyxoviridae_1
Gallus gallus	Dromaius novaehollandiae	Orthomyxoviridae_1
Homo sapiens	Aves	Orthomyxoviridae_1
Homo sapiens	Sibirionetta formosa	Orthomyxoviridae_1
Sibirionetta formosa	Larus crassirostris	Orthomyxoviridae_1
Anatidae	Canis lupus familiaris	Orthomyxoviridae_1
Anatidae	Feliformia	Orthomyxoviridae_1
Canis lupus familiaris	Felis catus	Orthomyxoviridae_1
Homo sapiens	Aythya ferina	Orthomyxoviridae_1
Aythya ferina	Ondatra zibethicus	Orthomyxoviridae_1
Anatidae	Gallus gallus	Orthomyxoviridae_1
Anatidae	Canis lupus familiaris	Orthomyxoviridae_1
Anas platyrhynchos	Netta rufina	Orthomyxoviridae_1
Anas platyrhynchos	Anas acuta	Orthomyxoviridae_1
Anas platyrhynchos	Anser erythropus	Orthomyxoviridae_1
Anas platyrhynchos	Anas acuta	Orthomyxoviridae_1
Anas platyrhynchos	Aix galericulata	Orthomyxoviridae_1
Anatidae	Gallus gallus	Orthomyxoviridae_1
Anatidae	Gallus gallus	Orthomyxoviridae_1
Anatidae	Meleagris gallopavo	Orthomyxoviridae_1
Anatidae	Gallus gallus	Orthomyxoviridae_1
Tadorna ferruginea	Anser indicus	Orthomyxoviridae_1
Homo sapiens	Tadorna ferruginea	Orthomyxoviridae_1
Tadorna ferruginea	Anas carolinensis	Orthomyxoviridae_1
Gallus gallus	Anatidae	Orthomyxoviridae_1
Anatidae	Gallus gallus	Orthomyxoviridae_1
Anatidae	Leiothrix lutea	Orthomyxoviridae_1
Leiothrix lutea	Gallus gallus	Orthomyxoviridae_1
Anas platyrhynchos	Anser albifrons	Orthomyxoviridae_1
Anas platyrhynchos	Numididae	Orthomyxoviridae_1
Anas platyrhynchos	Gallus gallus	Orthomyxoviridae_1
Anas platyrhynchos	Gallus gallus	Orthomyxoviridae_1
Anatidae	Gallus gallus	Orthomyxoviridae_1
Anatidae	Mustela lutreola	Orthomyxoviridae_1
Anatidae	Gallus gallus	Orthomyxoviridae_1
Anas platyrhynchos	Sibirionetta formosa	Orthomyxoviridae_1
Sibirionetta formosa	Numenius arquata	Orthomyxoviridae_1
Anas platyrhynchos	Anas crecca	Orthomyxoviridae_1
Anatidae	Columbidae	Orthomyxoviridae_1
Anatidae	Gallus gallus	Orthomyxoviridae_1
Anatidae	Gallus gallus	Orthomyxoviridae_1
Anatidae	Gallus gallus	Orthomyxoviridae_1
Anatidae	Grus nigricollis	Orthomyxoviridae_1
Anatidae	Numenius arquata	Orthomyxoviridae_1
Anatidae	Gallus gallus	Orthomyxoviridae_1
Anatidae	Gallus gallus	Orthomyxoviridae_1
Anatidae	Himantopus himantopus	Orthomyxoviridae_1
Anatidae	Columbidae	Orthomyxoviridae_1
Anatidae	Gallus gallus	Orthomyxoviridae_1
Anas platyrhynchos	Gallus gallus	Orthomyxoviridae_1
Gallus gallus	Anatidae	Orthomyxoviridae_1
Gallus gallus	Anatidae	Orthomyxoviridae_1
Gallus gallus	Anatidae	Orthomyxoviridae_1
Gallus gallus	Anatidae	Orthomyxoviridae_1
Anas platyrhynchos	Calidris ruficollis	Orthomyxoviridae_1
Anas platyrhynchos	Gallus gallus	Orthomyxoviridae_1
Anatidae	Homo sapiens	Orthomyxoviridae_1
Anatidae	Sus scrofa	Orthomyxoviridae_1
Gallus gallus	Anatidae	Orthomyxoviridae_1
Anatidae	Gallus gallus	Orthomyxoviridae_1
Anatidae	Gallus gallus	Orthomyxoviridae_1
Anatidae	Gallus gallus	Orthomyxoviridae_1
Anatidae	Gallus gallus	Orthomyxoviridae_1
Gallus gallus	Canis lupus familiaris	Orthomyxoviridae_1
Anatidae	Gallus gallus	Orthomyxoviridae_1
Anatidae	Gallus gallus	Orthomyxoviridae_1
Anatidae	Gallus gallus	Orthomyxoviridae_1
Anatidae	Meleagris gallopavo	Orthomyxoviridae_1
Meleagris gallopavo	Gallus gallus	Orthomyxoviridae_1
Anas platyrhynchos	Laridae	Orthomyxoviridae_1
Anas platyrhynchos	Struthio camelus	Orthomyxoviridae_1
Anas platyrhynchos	Gallus gallus	Orthomyxoviridae_1
Mustela	Aves	Orthomyxoviridae_1
Gallus gallus	Mustela	Orthomyxoviridae_1
Anatidae	Gallus gallus	Orthomyxoviridae_1
Anatidae	Meleagris gallopavo	Orthomyxoviridae_1
Anatidae	Chroicocephalus ridibundus	Orthomyxoviridae_1
Chroicocephalus ridibundus	Larus mongolicus	Orthomyxoviridae_1
Chroicocephalus ridibundus	Numenius arquata	Orthomyxoviridae_1
Chroicocephalus ridibundus	Larus delawarensis	Orthomyxoviridae_1
Anatidae	Meleagris gallopavo	Orthomyxoviridae_1
Anatidae	Chroicocephalus ridibundus	Orthomyxoviridae_1
Anatidae	Laridae	Orthomyxoviridae_1
Sus scrofa	Homo sapiens	Orthomyxoviridae_1
Homo sapiens	Sus scrofa	Orthomyxoviridae_1
Homo sapiens	Sus scrofa	Orthomyxoviridae_1
Homo sapiens	Sus scrofa	Orthomyxoviridae_1
Homo sapiens	Sus scrofa	Orthomyxoviridae_1
Homo sapiens	Sus scrofa	Orthomyxoviridae_1
Homo sapiens	Sus scrofa	Orthomyxoviridae_1
Homo sapiens	Sus scrofa	Orthomyxoviridae_1
Homo sapiens	Sus scrofa	Orthomyxoviridae_1
Homo sapiens	Sus scrofa	Orthomyxoviridae_1
Homo sapiens	Sus scrofa	Orthomyxoviridae_1
Sus scrofa	Homo sapiens	Orthomyxoviridae_1
Homo sapiens	Sus scrofa	Orthomyxoviridae_1
Sus scrofa	Homo sapiens	Orthomyxoviridae_1
Homo sapiens	Sus scrofa	Orthomyxoviridae_1
Homo sapiens	Mustela putorius furo	Orthomyxoviridae_1
Homo sapiens	Meleagris gallopavo	Orthomyxoviridae_1
Homo sapiens	Melursus ursinus	Orthomyxoviridae_1
Homo sapiens	Sus scrofa domesticus	Orthomyxoviridae_1
Sus scrofa	Homo sapiens	Orthomyxoviridae_1
Homo sapiens	Sus scrofa	Orthomyxoviridae_1
Homo sapiens	Sus scrofa	Orthomyxoviridae_1
Sus scrofa	Mustela lutreola	Orthomyxoviridae_1
Sus scrofa	Meleagris gallopavo	Orthomyxoviridae_1
Sus scrofa	Homo sapiens	Orthomyxoviridae_1
Sus scrofa	Equus caballus	Orthomyxoviridae_1
Anatidae	Homo sapiens	Orthomyxoviridae_1
Homo sapiens	Anatidae	Orthomyxoviridae_1
Canis lupus familiaris	Sus scrofa	Orthomyxoviridae_1
Homo sapiens	Canis lupus familiaris	Orthomyxoviridae_1
Homo sapiens	Sus scrofa	Orthomyxoviridae_1
Sus scrofa	Homo sapiens	Orthomyxoviridae_1
Homo sapiens	Branta canadensis	Orthomyxoviridae_1
Homo sapiens	Anas rubripes	Orthomyxoviridae_1
Anas platyrhynchos	Gallus gallus	Orthomyxoviridae_1
Anas platyrhynchos	Galliformes	Orthomyxoviridae_1
Meleagris gallopavo	Anas platyrhynchos	Orthomyxoviridae_1
Anas platyrhynchos	Spatula clypeata	Orthomyxoviridae_1
Anas platyrhynchos	Anas carolinensis	Orthomyxoviridae_1
Anas platyrhynchos	Meleagris gallopavo	Orthomyxoviridae_1
Anas platyrhynchos	Spatula clypeata	Orthomyxoviridae_1
Meleagris gallopavo	Anatidae	Orthomyxoviridae_1
Anas platyrhynchos	Anas acuta	Orthomyxoviridae_1
Anas platyrhynchos	Spatula clypeata	Orthomyxoviridae_1
Anas platyrhynchos	Arenaria interpres	Orthomyxoviridae_1
Anas platyrhynchos	Arenaria interpres	Orthomyxoviridae_1
Arenaria interpres	Calidris alba	Orthomyxoviridae_1
Anas platyrhynchos	Arenaria interpres	Orthomyxoviridae_1
Anas platyrhynchos	Anas rubripes	Orthomyxoviridae_1
Anas platyrhynchos	Spatula discors	Orthomyxoviridae_1
Anatidae	Numididae	Orthomyxoviridae_1
Anas acuta	Mareca americana	Orthomyxoviridae_1
Anas platyrhynchos	Anas acuta	Orthomyxoviridae_1
Anas acuta	Anas platyrhynchos	Orthomyxoviridae_1
Spatula clypeata	Anas acuta	Orthomyxoviridae_1
Anas platyrhynchos	Spatula clypeata	Orthomyxoviridae_1
Anas platyrhynchos	Gallus gallus	Orthomyxoviridae_1
Anas platyrhynchos	Anas acuta	Orthomyxoviridae_1
Anas platyrhynchos	Arenaria interpres	Orthomyxoviridae_1
Arenaria interpres	Calidris alba	Orthomyxoviridae_1
Arenaria interpres	Calidris canutus	Orthomyxoviridae_1
Arenaria interpres	Calidris canutus	Orthomyxoviridae_1
Arenaria interpres	Calidris alba	Orthomyxoviridae_1
Arenaria interpres	Calidris alba	Orthomyxoviridae_1
Arenaria interpres	Calidris alba	Orthomyxoviridae_1
Anas platyrhynchos	Arenaria interpres	Orthomyxoviridae_1
Anas platyrhynchos	Anser albifrons	Orthomyxoviridae_1
Anser albifrons	Cygnus columbianus	Orthomyxoviridae_1
Anas platyrhynchos	Arenaria interpres	Orthomyxoviridae_1
Arenaria interpres	Calidris alba	Orthomyxoviridae_1
Arenaria interpres	Calidris canutus	Orthomyxoviridae_1
Arenaria interpres	Anas platyrhynchos	Orthomyxoviridae_1
Arenaria interpres	Calidris alba	Orthomyxoviridae_1
Anas platyrhynchos	Arenaria interpres	Orthomyxoviridae_1
Anas platyrhynchos	Arenaria interpres	Orthomyxoviridae_1
Arenaria interpres	Spatula clypeata	Orthomyxoviridae_1
Arenaria interpres	Anas platyrhynchos	Orthomyxoviridae_1
Anas platyrhynchos	Spatula discors	Orthomyxoviridae_1
Anas platyrhynchos	Arenaria interpres	Orthomyxoviridae_1
Anas platyrhynchos	Calidris canutus	Orthomyxoviridae_1
Anas platyrhynchos	Galliformes	Orthomyxoviridae_1
Anas platyrhynchos	Polysticta stelleri	Orthomyxoviridae_1
Anas platyrhynchos	Mareca strepera	Orthomyxoviridae_1
Anas platyrhynchos	Branta canadensis	Orthomyxoviridae_1
Anas platyrhynchos	Cygnus columbianus	Orthomyxoviridae_1
Cygnus columbianus	Anser albifrons	Orthomyxoviridae_1
Cygnus columbianus	Branta canadensis	Orthomyxoviridae_1
Anas platyrhynchos	Anas acuta	Orthomyxoviridae_1
Anas platyrhynchos	Spatula clypeata	Orthomyxoviridae_1
Anas platyrhynchos	Polysticta stelleri	Orthomyxoviridae_1
Anas platyrhynchos	Polysticta stelleri	Orthomyxoviridae_1
Anas platyrhynchos	Gallus gallus	Orthomyxoviridae_1
Anas platyrhynchos	Spatula discors	Orthomyxoviridae_1
Anas platyrhynchos	Pelecanus thagus	Orthomyxoviridae_1
Anas platyrhynchos	Spatula clypeata	Orthomyxoviridae_1
Anas platyrhynchos	Mareca americana	Orthomyxoviridae_1
Anas platyrhynchos	Polysticta stelleri	Orthomyxoviridae_1
Anas platyrhynchos	Anas acuta	Orthomyxoviridae_1
Anas platyrhynchos	Branta canadensis	Orthomyxoviridae_1
Anas platyrhynchos	Arenaria interpres	Orthomyxoviridae_1
Anas platyrhynchos	Branta canadensis	Orthomyxoviridae_1
Anas platyrhynchos	Mareca strepera	Orthomyxoviridae_1
Anas platyrhynchos	Gallus gallus	Orthomyxoviridae_1
Anas platyrhynchos	Anas carolinensis	Orthomyxoviridae_1
Anas platyrhynchos	Anser caerulescens	Orthomyxoviridae_1
Anas platyrhynchos	Anas acuta	Orthomyxoviridae_1
Anas platyrhynchos	Arenaria interpres	Orthomyxoviridae_1
Polysticta stelleri	Anas acuta	Orthomyxoviridae_1
Anas platyrhynchos	Polysticta stelleri	Orthomyxoviridae_1
Anatidae	Gallus gallus	Orthomyxoviridae_1
Anatidae	Gallus gallus	Orthomyxoviridae_1
Anas platyrhynchos	Arenaria interpres	Orthomyxoviridae_1
Arenaria interpres	Leucophaeus atricilla	Orthomyxoviridae_1
Spatula discors	Anas carolinensis	Orthomyxoviridae_1
Anas platyrhynchos	Spatula discors	Orthomyxoviridae_1
Anas platyrhynchos	Polysticta stelleri	Orthomyxoviridae_1
Anas platyrhynchos	Branta canadensis	Orthomyxoviridae_1
Anas platyrhynchos	Arenaria interpres	Orthomyxoviridae_1
Arenaria interpres	Calidris alba	Orthomyxoviridae_1
Anas platyrhynchos	Arenaria interpres	Orthomyxoviridae_1
Anas platyrhynchos	Branta canadensis	Orthomyxoviridae_1
Anas platyrhynchos	Anas carolinensis	Orthomyxoviridae_1
Anas platyrhynchos	Mareca americana	Orthomyxoviridae_1
Anas platyrhynchos	Anas acuta	Orthomyxoviridae_1
Anas platyrhynchos	Mareca americana	Orthomyxoviridae_1
Anas platyrhynchos	Polysticta stelleri	Orthomyxoviridae_1
Anas platyrhynchos	Anas carolinensis	Orthomyxoviridae_1
Anatidae	Galliformes	Orthomyxoviridae_1
Anas platyrhynchos	Spatula discors	Orthomyxoviridae_1
Anas platyrhynchos	Arenaria interpres	Orthomyxoviridae_1
Anas platyrhynchos	Mareca americana	Orthomyxoviridae_1
Anas platyrhynchos	Spatula discors	Orthomyxoviridae_1
Spatula discors	Arenaria interpres	Orthomyxoviridae_1
Anas platyrhynchos	Arenaria interpres	Orthomyxoviridae_1
Anas platyrhynchos	Gallus gallus	Orthomyxoviridae_1
Gallus gallus	Amazona oratrix	Orthomyxoviridae_1
Anas platyrhynchos	Leucophaeus atricilla	Orthomyxoviridae_1
Anas platyrhynchos	Gallus gallus	Orthomyxoviridae_1
Arenaria interpres	Calidris alba	Orthomyxoviridae_1
Anas platyrhynchos	Arenaria interpres	Orthomyxoviridae_1
Anas platyrhynchos	Calidris canutus	Orthomyxoviridae_1
Meleagris gallopavo	Anas platyrhynchos	Orthomyxoviridae_1
Meleagris gallopavo	Anatidae	Orthomyxoviridae_1
Anas platyrhynchos	Cygnus olor	Orthomyxoviridae_1
Anas platyrhynchos	Cygnus columbianus	Orthomyxoviridae_1
Anas platyrhynchos	Arenaria interpres	Orthomyxoviridae_1
Arenaria interpres	Calidris canutus	Orthomyxoviridae_1
Meleagris gallopavo	Arenaria interpres	Orthomyxoviridae_1
Arenaria interpres	Calidris canutus	Orthomyxoviridae_1
Arenaria interpres	Calidris canutus	Orthomyxoviridae_1
Meleagris gallopavo	Anas acuta	Orthomyxoviridae_1
Arenaria interpres	Calidris pusilla	Orthomyxoviridae_1
Arenaria interpres	Leucophaeus atricilla	Orthomyxoviridae_1
Arenaria interpres	Larus delawarensis	Orthomyxoviridae_1
Arenaria interpres	Gallus gallus	Orthomyxoviridae_1
Arenaria interpres	Calidris fuscicollis	Orthomyxoviridae_1
Anatidae	Galliformes	Orthomyxoviridae_1
Meleagris gallopavo	Psittacidae	Orthomyxoviridae_1
Meleagris gallopavo	Homo sapiens	Orthomyxoviridae_1
Anatidae	Meleagris gallopavo	Orthomyxoviridae_1
Meleagris gallopavo	Anas platyrhynchos	Orthomyxoviridae_1
Meleagris gallopavo	Anas carolinensis	Orthomyxoviridae_1
Meleagris gallopavo	Anatidae	Orthomyxoviridae_1
Meleagris gallopavo	Gallus gallus	Orthomyxoviridae_1
Meleagris gallopavo	Arenaria interpres	Orthomyxoviridae_1
Arenaria interpres	Larus hyperboreus	Orthomyxoviridae_1
Meleagris gallopavo	Gallus gallus	Orthomyxoviridae_1
Meleagris gallopavo	Phocidae	Orthomyxoviridae_1
Meleagris gallopavo	Anas platyrhynchos	Orthomyxoviridae_1
Meleagris gallopavo	Gallus gallus	Orthomyxoviridae_1
Anas platyrhynchos	Meleagris gallopavo	Orthomyxoviridae_1
Meleagris gallopavo	Phocidae	Orthomyxoviridae_1
Meleagris gallopavo	Anatidae	Orthomyxoviridae_1
Meleagris gallopavo	Anas carolinensis	Orthomyxoviridae_1
Anas platyrhynchos	Anas acuta	Orthomyxoviridae_1
Anas platyrhynchos	Laridae	Orthomyxoviridae_1
Anas platyrhynchos	Cygnus columbianus	Orthomyxoviridae_1
Anas platyrhynchos	Gallus gallus	Orthomyxoviridae_1
Gallus gallus	Meleagris gallopavo	Orthomyxoviridae_1
Anatidae	Gallus gallus	Orthomyxoviridae_1
Anatidae	Gallus gallus	Orthomyxoviridae_1
Anatidae	Galliformes	Orthomyxoviridae_1
Anatidae	Gallus gallus	Orthomyxoviridae_1
Anatidae	Equus caballus	Orthomyxoviridae_1
Anatidae	Sus scrofa	Orthomyxoviridae_1
Sus scrofa	Homo sapiens	Orthomyxoviridae_1
Francolinus pintadeanus	Homo sapiens	Orthomyxoviridae_1
Homo sapiens	Gallus gallus	Orthomyxoviridae_1
Homo sapiens	Anatidae	Orthomyxoviridae_1
Homo sapiens	Anas platyrhynchos	Orthomyxoviridae_1
Homo sapiens	Gallus gallus	Orthomyxoviridae_1
Anatidae	Galliformes	Orthomyxoviridae_1
Anatidae	Gallus gallus	Orthomyxoviridae_1
Gallus gallus	Anatidae	Orthomyxoviridae_1
Gallus gallus	Anatidae	Orthomyxoviridae_1
Gallus gallus	Anatidae	Orthomyxoviridae_1
Gallus gallus	Anatidae	Orthomyxoviridae_1
Gallus gallus	Anatidae	Orthomyxoviridae_1
Gallus gallus	Anatidae	Orthomyxoviridae_1
Homo sapiens	Anser anser	Orthomyxoviridae_1
Anatidae	Columbidae	Orthomyxoviridae_1
Anatidae	Gallus gallus	Orthomyxoviridae_1
Anatidae	Gallus gallus	Orthomyxoviridae_1
Anatidae	Gallus gallus	Orthomyxoviridae_1
Anatidae	Gallus gallus	Orthomyxoviridae_1
Anatidae	Gallus gallus	Orthomyxoviridae_1
Anatidae	Homo sapiens	Orthomyxoviridae_1
Anatidae	Struthio camelus	Orthomyxoviridae_1
Gallus gallus	Psittacidae	Orthomyxoviridae_1
Gallus gallus	Homo sapiens	Orthomyxoviridae_1
Gallus gallus	Homo sapiens	Orthomyxoviridae_1
Anatidae	Gallus gallus	Orthomyxoviridae_1
Gallus gallus	Anatidae	Orthomyxoviridae_1
Anatidae	Gallus gallus	Orthomyxoviridae_1
Gallus gallus	Cairina moschata	Orthomyxoviridae_1
Anatidae	Homo sapiens	Orthomyxoviridae_1
Anatidae	Homo sapiens	Orthomyxoviridae_1
Anatidae	Homo sapiens	Orthomyxoviridae_1
Anatidae	Gallus gallus	Orthomyxoviridae_1
Anatidae	Homo sapiens	Orthomyxoviridae_1
Anatidae	Gallus gallus	Orthomyxoviridae_1
Gallus gallus	Cairina moschata	Orthomyxoviridae_1
Anatidae	Homo sapiens	Orthomyxoviridae_1
Anatidae	Gallus gallus	Orthomyxoviridae_1
Anatidae	Homo sapiens	Orthomyxoviridae_1
Anatidae	Gallus gallus	Orthomyxoviridae_1
Gallus gallus	Anatidae	Orthomyxoviridae_1
Gallus gallus	Anatidae	Orthomyxoviridae_1
Anatidae	Gallus gallus	Orthomyxoviridae_1
Gallus gallus	Anser cygnoides	Orthomyxoviridae_1
Anatidae	Felis catus	Orthomyxoviridae_1
Anatidae	Gallus gallus	Orthomyxoviridae_1
Gallus gallus	Feliformia	Orthomyxoviridae_1
Anatidae	Gallus gallus	Orthomyxoviridae_1
Gallus gallus	Anatidae	Orthomyxoviridae_1
Gallus gallus	Anatidae	Orthomyxoviridae_1
Gallus gallus	Anatidae	Orthomyxoviridae_1
Gallus gallus	Anatidae	Orthomyxoviridae_1
Anatidae	Mustela lutreola	Orthomyxoviridae_1
Gallus gallus	Panthera tigris tigris	Orthomyxoviridae_1
Sus scrofa	Anatidae	Orthomyxoviridae_1
Sus scrofa	Columbidae	Orthomyxoviridae_1
Gallus gallus	Sus scrofa	Orthomyxoviridae_1
Anatidae	Gallus gallus	Orthomyxoviridae_1
Anatidae	Suricata suricatta	Orthomyxoviridae_1
Columbidae	Anatidae	Orthomyxoviridae_1
Anatidae	Columbidae	Orthomyxoviridae_1
Anatidae	Columbidae	Orthomyxoviridae_1
Anatidae	Homo sapiens	Orthomyxoviridae_1
Gallus gallus	Anas platyrhynchos	Orthomyxoviridae_1
Anatidae	Homo sapiens	Orthomyxoviridae_1
Homo sapiens	Gallus gallus	Orthomyxoviridae_1
Anatidae	Gallus gallus	Orthomyxoviridae_1
Anatidae	Homo sapiens	Orthomyxoviridae_1
Anatidae	Gallus gallus	Orthomyxoviridae_1
Anatidae	Laniidae	Orthomyxoviridae_1
Anatidae	Gallus gallus	Orthomyxoviridae_1
Anatidae	Homo sapiens	Orthomyxoviridae_1
Anatidae	Gallus gallus	Orthomyxoviridae_1
Anatidae	Sus scrofa	Orthomyxoviridae_1
Anatidae	Homo sapiens	Orthomyxoviridae_1
Anatidae	Columbidae	Orthomyxoviridae_1
Anatidae	Homo sapiens	Orthomyxoviridae_1
Anatidae	Gallus gallus	Orthomyxoviridae_1
Gallus gallus	Anatidae	Orthomyxoviridae_1
Anatidae	Gallus gallus	Orthomyxoviridae_1
Gallus gallus	Anatidae	Orthomyxoviridae_1
Anser indicus	Corvidae	Orthomyxoviridae_1
Anser indicus	Anas platyrhynchos	Orthomyxoviridae_1
Gallus gallus	Anser indicus	Orthomyxoviridae_1
Anser indicus	Phalacrocorax carbo	Orthomyxoviridae_1
Gallus gallus	Anas carolinensis	Orthomyxoviridae_1
Gallus gallus	Falco cherrug	Orthomyxoviridae_1
Gallus gallus	Anatidae	Orthomyxoviridae_1
Anatidae	Meleagris gallopavo	Orthomyxoviridae_1
Homo sapiens	Bos taurus	Orthomyxoviridae_11
Homo sapiens	Sus scrofa	Orthomyxoviridae_11
Sus scrofa	Homo sapiens	Orthomyxoviridae_2
Homo sapiens	Sus scrofa	Orthomyxoviridae_2
Sus scrofa	Meleagris gallopavo	Orthomyxoviridae_2
Sus scrofa	Meleagris gallopavo	Orthomyxoviridae_2
Meleagris gallopavo	Gallus gallus	Orthomyxoviridae_2
Meleagris gallopavo	Sus scrofa	Orthomyxoviridae_2
Meleagris gallopavo	Sus scrofa	Orthomyxoviridae_2
Homo sapiens	Rhizomys pruinosus	Orthomyxoviridae_4
Homo sapiens	Sus scrofa	Orthomyxoviridae_4
Bos taurus	Sus scrofa	Orthomyxoviridae_8
Bos taurus	Sus scrofa scrofa	Orthomyxoviridae_8
Bos taurus	Sus scrofa	Orthomyxoviridae_8
Bos taurus	Sus scrofa	Orthomyxoviridae_8
Bos taurus	Sus scrofa	Orthomyxoviridae_8
Bos taurus	Sus scrofa	Orthomyxoviridae_8
Bos taurus	Sus scrofa	Orthomyxoviridae_8
Cervus elaphus	Capreolus capreolus	Papillomaviridae_67
Bos taurus	Equus caballus	Papillomaviridae_73
Equus caballus	Bos taurus	Papillomaviridae_73
Bos taurus	Equus caballus	Papillomaviridae_73
Equus caballus	Equus asinus	Papillomaviridae_73
Equus caballus	Bos taurus	Papillomaviridae_73
Bos taurus	Equus caballus	Papillomaviridae_73
Equus caballus	Equus asinus	Papillomaviridae_73
Equus caballus	Bos taurus	Papillomaviridae_73
Bos taurus	Equus caballus	Papillomaviridae_73
Bos taurus	Equus caballus	Papillomaviridae_73
Equus caballus	Equus asinus	Papillomaviridae_73
Equus caballus	Bos taurus	Papillomaviridae_73
Ovis aries	Bos taurus	Papillomaviridae_73
Equus caballus	Ovis aries	Papillomaviridae_73
Ovis aries	Equus caballus	Papillomaviridae_73
Bos taurus	Equus ferus	Papillomaviridae_73
Bos taurus	Equus caballus	Papillomaviridae_73
Bos taurus	Equus caballus	Papillomaviridae_73
Equus caballus	Bos taurus	Papillomaviridae_73
Equus caballus	Bos taurus	Papillomaviridae_73
Bos taurus	Equus caballus	Papillomaviridae_73
Equus caballus	Bos taurus	Papillomaviridae_73
Bos taurus	Equus caballus	Papillomaviridae_73
Bos taurus	Equus caballus	Papillomaviridae_73
Bos taurus	Equus caballus	Papillomaviridae_73
Bos taurus	Equus caballus	Papillomaviridae_73
Equus caballus	Bos taurus	Papillomaviridae_73
Equus caballus	Bos taurus	Papillomaviridae_73
Equus caballus	Bos taurus	Papillomaviridae_73
Aix galericulata	Anas crecca	Paramyxoviridae_12
Anas crecca	Mareca penelope	Paramyxoviridae_12
Anas crecca	Anas platyrhynchos	Paramyxoviridae_12
Anas crecca	Mareca penelope	Paramyxoviridae_12
Anas crecca	Anas platyrhynchos	Paramyxoviridae_12
Anas crecca	Anas platyrhynchos	Paramyxoviridae_12
Anas crecca	Anas platyrhynchos	Paramyxoviridae_12
Anas crecca	Mareca strepera	Paramyxoviridae_12
Anseriformes	Uria aalge	Paramyxoviridae_12
Chiroptera	Anatidae	Paramyxoviridae_16
Anatidae	Gallus gallus	Paramyxoviridae_16
Chiroptera	Anseriformes	Paramyxoviridae_16
Chiroptera	Anas platyrhynchos	Paramyxoviridae_16
Chiroptera	Mareca falcata	Paramyxoviridae_16
Chiroptera	Mareca penelope	Paramyxoviridae_16
Chiroptera	Struthio camelus	Paramyxoviridae_16
Anseriformes	Fulica	Paramyxoviridae_16
Chiroptera	Charadriiformes	Paramyxoviridae_16
Anatidae	Ardeidae	Paramyxoviridae_16
Anatidae	Gallus gallus	Paramyxoviridae_16
Anatidae	Gallus gallus	Paramyxoviridae_16
Gallus gallus	Pavo	Paramyxoviridae_16
Gallus gallus	Columbidae	Paramyxoviridae_16
Anatidae	Gallus gallus	Paramyxoviridae_16
Gallus gallus	Anser fabalis	Paramyxoviridae_16
Gallus gallus	Anatidae	Paramyxoviridae_16
Gallus gallus	Anatidae	Paramyxoviridae_16
Gallus gallus	Anatidae	Paramyxoviridae_16
Anatidae	Gallus gallus	Paramyxoviridae_16
Anatidae	Gallus gallus	Paramyxoviridae_16
Anatidae	Gallus gallus	Paramyxoviridae_16
Anatidae	Gallus gallus	Paramyxoviridae_16
Gallus gallus	Columbidae	Paramyxoviridae_16
Anatidae	Gallus gallus	Paramyxoviridae_16
Anatidae	Columbidae	Paramyxoviridae_16
Gallus gallus	Cairina moschata	Paramyxoviridae_16
Anatidae	Gallus gallus	Paramyxoviridae_16
Anatidae	Gallus gallus	Paramyxoviridae_16
Anas crecca	Spatula querquedula	Paramyxoviridae_17
Equus caballus	Homo sapiens	Paramyxoviridae_19
Equus caballus	Chiroptera	Paramyxoviridae_19
Camelus dromedarius	Bos taurus	Paramyxoviridae_23
Bos taurus	Bos grunniens	Paramyxoviridae_23
Canis lupus familiaris	Macaca fascicularis	Paramyxoviridae_3
Canis lupus familiaris	Simiiformes	Paramyxoviridae_3
Canis lupus familiaris	Macaca mulatta	Paramyxoviridae_3
Mustela putorius furo	Canis lupus familiaris	Paramyxoviridae_3
Canis lupus familiaris	Nyctereutes procyonoides	Paramyxoviridae_3
Mustela putorius furo	Canidae	Paramyxoviridae_3
Canis lupus familiaris	Nyctereutes procyonoides	Paramyxoviridae_3
Canidae	Mustela lutreola	Paramyxoviridae_3
Canis lupus familiaris	Ailuropoda melanoleuca	Paramyxoviridae_3
Neogale vison	Mustela lutreola	Paramyxoviridae_3
Canis lupus familiaris	Neogale vison	Paramyxoviridae_3
Canis lupus familiaris	Vulpes	Paramyxoviridae_3
Canis lupus familiaris	Nyctereutes procyonoides	Paramyxoviridae_3
Canis lupus familiaris	Mustela lutreola	Paramyxoviridae_3
Canis lupus familiaris	Canis simensis	Paramyxoviridae_3
Canis lupus familiaris	Procyon lotor	Paramyxoviridae_3
Canis lupus familiaris	Procyon lotor	Paramyxoviridae_3
Canis lupus familiaris	Paguma larvata	Paramyxoviridae_3
Canis lupus familiaris	Cerdocyon thous	Paramyxoviridae_3
Canis lupus familiaris	Procyon lotor	Paramyxoviridae_3
Procyon lotor	Canidae	Paramyxoviridae_3
Canis lupus familiaris	Paradoxurus hermaphroditus	Paramyxoviridae_3
Canis lupus familiaris	Ailurus fulgens	Paramyxoviridae_3
Pusa sibirica	Panthera tigris altaica	Paramyxoviridae_3
Canis lupus familiaris	Pusa sibirica	Paramyxoviridae_3
Canis lupus familiaris	Lycaon pictus	Paramyxoviridae_3
Canis lupus familiaris	Crocuta crocuta	Paramyxoviridae_3
Mustela putorius furo	Mustela lutreola	Paramyxoviridae_3
Mustela putorius furo	Canis lupus familiaris	Paramyxoviridae_3
Mustela putorius furo	Pusa caspica	Paramyxoviridae_3
Canis lupus familiaris	Lycaon pictus	Paramyxoviridae_3
Lycaon pictus	Canis aureus	Paramyxoviridae_3
Canis lupus familiaris	Hyaenidae	Paramyxoviridae_3
Canis lupus familiaris	Crocuta crocuta	Paramyxoviridae_3
Crocuta crocuta	Panthera leo	Paramyxoviridae_3
Crocuta crocuta	Panthera leo	Paramyxoviridae_3
Crocuta crocuta	Panthera leo	Paramyxoviridae_3
Canis lupus familiaris	Otocyon megalotis	Paramyxoviridae_3
Canis lupus familiaris	Panthera leo	Paramyxoviridae_3
Sus scrofa	Bovidae	Paramyxoviridae_30
Sus scrofa	Serpentes	Paramyxoviridae_30
Sus scrofa	Canis lupus familiaris	Paramyxoviridae_30
Sus scrofa	Canis lupus familiaris	Paramyxoviridae_30
Sus scrofa	Ailurus fulgens	Paramyxoviridae_30
Sus scrofa	Pholidota	Paramyxoviridae_30
Sus scrofa	Panthera tigris tigris	Paramyxoviridae_30
Sus scrofa	Panthera tigris altaica	Paramyxoviridae_30
Sus scrofa	Bos taurus	Paramyxoviridae_30
Canis lupus familiaris	Sus scrofa	Paramyxoviridae_30
Canis lupus familiaris	Sus scrofa	Paramyxoviridae_30
Sus scrofa	Panthera tigris	Paramyxoviridae_30
Sus scrofa	Panthera tigris tigris	Paramyxoviridae_30
Equus caballus	Homo sapiens	Paramyxoviridae_30
Homo sapiens	Papio ursinus	Paramyxoviridae_4
Homo sapiens	Pan troglodytes schweinfurthii	Paramyxoviridae_4
Homo sapiens	Cercopithecus mitis	Paramyxoviridae_4
Gallus gallus	Columbidae	Paramyxoviridae_5
Columbidae	Acridotheres	Paramyxoviridae_5
Gallus gallus	Columba livia	Paramyxoviridae_5
Columba livia	Anas platyrhynchos	Paramyxoviridae_5
Columba livia	Fulica atra	Paramyxoviridae_5
Columbidae	Gallus gallus	Paramyxoviridae_5
Gallus gallus	Streptopelia decaocto	Paramyxoviridae_5
Gallus gallus	Columbidae	Paramyxoviridae_5
Columbidae	Dendrocopos major	Paramyxoviridae_5
Columbidae	Amaurornis phoenicurus	Paramyxoviridae_5
Columbidae	Galliformes	Paramyxoviridae_5
Gallus gallus	Columba	Paramyxoviridae_5
Columbidae	Sus scrofa	Paramyxoviridae_5
Gallus gallus	Spilopelia chinensis	Paramyxoviridae_5
Spilopelia chinensis	Phasianinae	Paramyxoviridae_5
Spilopelia chinensis	Galliformes	Paramyxoviridae_5
Columbidae	Gallus gallus	Paramyxoviridae_5
Columbidae	Psittacidae	Paramyxoviridae_5
Columbidae	Gallus gallus	Paramyxoviridae_5
Gallus gallus	Streptopelia decaocto	Paramyxoviridae_5
Gallus gallus	Columba livia	Paramyxoviridae_5
Gallus gallus	Nipponia nippon	Paramyxoviridae_5
Gallus gallus	Struthio camelus	Paramyxoviridae_5
Nipponia nippon	Gallus gallus	Paramyxoviridae_5
Gallus gallus	Columbidae	Paramyxoviridae_5
Gallus gallus	Anatidae	Paramyxoviridae_5
Gallus gallus	Anatidae	Paramyxoviridae_5
Gallus gallus	Anas platyrhynchos	Paramyxoviridae_5
Gallus gallus	Anatidae	Paramyxoviridae_5
Gallus gallus	Anatidae	Paramyxoviridae_5
Gallus gallus	Columbidae	Paramyxoviridae_5
Gallus gallus	Anas	Paramyxoviridae_5
Gallus gallus	Anatidae	Paramyxoviridae_5
Gallus gallus	Bubulcus ibis	Paramyxoviridae_5
Gallus gallus	Anatidae	Paramyxoviridae_5
Gallus gallus	Anatidae	Paramyxoviridae_5
Gallus gallus	Anatidae	Paramyxoviridae_5
Gallus gallus	Columbidae	Paramyxoviridae_5
Gallus gallus	Anatidae	Paramyxoviridae_5
Anatidae	Gallus gallus	Paramyxoviridae_5
Gallus gallus	Cairina moschata	Paramyxoviridae_5
Anatidae	Spheniscidae	Paramyxoviridae_5
Gallus gallus	Anatidae	Paramyxoviridae_5
Anatidae	Gallus gallus	Paramyxoviridae_5
Gallus gallus	Mustela lutreola	Paramyxoviridae_5
Gallus gallus	Cairina moschata	Paramyxoviridae_5
Gallus gallus	Anatidae	Paramyxoviridae_5
Gallus gallus	Nipponia nippon	Paramyxoviridae_5
Gallus gallus	Anatidae	Paramyxoviridae_5
Gallus gallus	Struthio camelus	Paramyxoviridae_5
Gallus gallus	Columbidae	Paramyxoviridae_5
Anatidae	Gallus gallus	Paramyxoviridae_5
Gallus gallus	Anas platyrhynchos	Paramyxoviridae_5
Gallus gallus	Anas platyrhynchos	Paramyxoviridae_5
Gallus gallus	Anatidae	Paramyxoviridae_5
Gallus gallus	Columbidae	Paramyxoviridae_5
Gallus gallus	Anatidae	Paramyxoviridae_5
Gallus gallus	Psittaciformes	Paramyxoviridae_5
Gallus gallus	Pavo cristatus	Paramyxoviridae_5
Gallus gallus	Columbidae	Paramyxoviridae_5
Gallus gallus	Anas platyrhynchos	Paramyxoviridae_5
Gallus gallus	Anas carolinensis	Paramyxoviridae_5
Gallus gallus	Phasianus colchicus	Paramyxoviridae_5
Gallus gallus	Numida meleagris	Paramyxoviridae_5
Gallus gallus	Lophura erythrophthalma	Paramyxoviridae_5
Gallus gallus	Tyto alba	Paramyxoviridae_5
Gallus gallus	Anatidae	Paramyxoviridae_5
Gallus gallus	Ardeidae	Paramyxoviridae_5
Gallus gallus	Meleagris gallopavo	Paramyxoviridae_5
Anatidae	Columbidae	Paramyxoviridae_5
Gallus gallus	Anatidae	Paramyxoviridae_5
Gallus gallus	Phalacrocoracidae	Paramyxoviridae_5
Gallus gallus	Coturnix japonica	Paramyxoviridae_5
Gallus gallus	Eos bornea	Paramyxoviridae_5
Gallus gallus	Anatidae	Paramyxoviridae_5
Anatidae	Gallus gallus	Paramyxoviridae_5
Gallus gallus	Anatidae	Paramyxoviridae_5
Gallus gallus	Meleagris gallopavo	Paramyxoviridae_5
Gallus gallus	Anatidae	Paramyxoviridae_5
Gallus gallus	Anas platyrhynchos	Paramyxoviridae_5
Gallus gallus	Anas platyrhynchos	Paramyxoviridae_5
Gallus gallus	Sus scrofa	Paramyxoviridae_5
Anatidae	Gallus gallus	Paramyxoviridae_5
Gallus gallus	Sus scrofa	Paramyxoviridae_5
Gallus gallus	Anatidae	Paramyxoviridae_5
Gallus gallus	Anatidae	Paramyxoviridae_5
Gallus gallus	Columbidae	Paramyxoviridae_5
Gallus gallus	Anatidae	Paramyxoviridae_5
Anatidae	Strigidae	Paramyxoviridae_5
Anatidae	Gallus gallus	Paramyxoviridae_5
Gallus gallus	Mustela lutreola	Paramyxoviridae_5
Gallus gallus	Ramphastos toco	Paramyxoviridae_5
Gallus gallus	Pavo cristatus	Paramyxoviridae_5
Gallus gallus	Anas platyrhynchos	Paramyxoviridae_5
Gallus gallus	Anas acuta	Paramyxoviridae_5
Anas acuta	Anas fulvigula	Paramyxoviridae_5
Gallus gallus	Chroicocephalus ridibundus	Paramyxoviridae_5
Gallus gallus	Laridae	Paramyxoviridae_5
Gallus gallus	Anatidae	Paramyxoviridae_5
Gallus gallus	Anatidae	Paramyxoviridae_5
Gallus gallus	Anatidae	Paramyxoviridae_5
Gallus gallus	Anas platyrhynchos	Paramyxoviridae_5
Gallus gallus	Anatidae	Paramyxoviridae_5
Anatidae	Rallus aquaticus	Paramyxoviridae_5
Anatidae	Gallus gallus	Paramyxoviridae_5
Anatidae	Charadriiformes	Paramyxoviridae_5
Anatidae	Uria aalge	Paramyxoviridae_5
Gallus gallus	Anser fabalis	Paramyxoviridae_5
Gallus gallus	Anas crecca	Paramyxoviridae_5
Gallus gallus	Anas	Paramyxoviridae_5
Gallus gallus	Spatula querquedula	Paramyxoviridae_5
Gallus gallus	Anas acuta	Paramyxoviridae_5
Gallus gallus	Cairina moschata	Paramyxoviridae_5
Gallus gallus	Anatidae	Paramyxoviridae_5
Anatidae	Turdus merula	Paramyxoviridae_5
Anatidae	Gallus gallus	Paramyxoviridae_5
Gallus gallus	Cairina moschata	Paramyxoviridae_5
Anatidae	Spilopelia chinensis	Paramyxoviridae_5
Gallus gallus	Anatidae	Paramyxoviridae_5
Gallus gallus	Anatidae	Paramyxoviridae_5
Gallus gallus	Columbidae	Paramyxoviridae_5
Gallus gallus	Columbidae	Paramyxoviridae_5
Gallus gallus	Phalacrocorax auritus	Paramyxoviridae_5
Gallus gallus	Columbidae	Paramyxoviridae_5
Stenella coeruleoalba	Stenella longirostris	Paramyxoviridae_53
Stenella coeruleoalba	Tursiops truncatus	Paramyxoviridae_53
Globicephala macrorhynchus	Stenella coeruleoalba	Paramyxoviridae_53
Stenella coeruleoalba	Lagenorhynchus albirostris	Paramyxoviridae_53
Globicephala macrorhynchus	Phocoenidae	Paramyxoviridae_53
Stenella coeruleoalba	Physeter catodon	Paramyxoviridae_53
Stenella coeruleoalba	Balaenoptera physalus	Paramyxoviridae_53
Balaenoptera physalus	Stenella coeruleoalba	Paramyxoviridae_53
Stenella coeruleoalba	Balaenoptera physalus	Paramyxoviridae_53
Stenella coeruleoalba	Tursiops truncatus	Paramyxoviridae_53
Bos taurus	Bos grunniens	Paramyxoviridae_61
Bos taurus	Giraffa camelopardalis	Paramyxoviridae_61
Giraffa camelopardalis	Tragelaphus imberbis	Paramyxoviridae_61
Homo sapiens	Pteropus giganteus	Paramyxoviridae_7
Homo sapiens	Pteropus lylei	Paramyxoviridae_7
Homo sapiens	Pteropus giganteus	Paramyxoviridae_7
Sus scrofa domesticus	Canis lupus familiaris	Paramyxoviridae_7
Anser	Anas platyrhynchos	Paramyxoviridae_8
Capra hircus	Ovis aries	Paramyxoviridae_9
Capra hircus	Ovis aries	Paramyxoviridae_9
Capra hircus	Ovis aries	Paramyxoviridae_9
Capra hircus	Pseudois nayaur	Paramyxoviridae_9
Capra hircus	Ovis aries	Paramyxoviridae_9
Capra hircus	Gazella gazella	Paramyxoviridae_9
Capra hircus	Ovis aries	Paramyxoviridae_9
Capra hircus	Ovis aries	Paramyxoviridae_9
Ovis aries	Capra ibex	Paramyxoviridae_9
Capra hircus	Ovis aries	Paramyxoviridae_9
Capra hircus	Procapra przewalskii	Paramyxoviridae_9
Capra hircus	Saiga tatarica mongolica	Paramyxoviridae_9
Saiga tatarica mongolica	Gazella subgutturosa	Paramyxoviridae_9
Saiga tatarica mongolica	Capra sibirica	Paramyxoviridae_9
Capra hircus	Ovis aries	Paramyxoviridae_9
Capra hircus	Capra nubiana	Paramyxoviridae_9
Capra hircus	Ovis aries	Paramyxoviridae_9
Capra hircus	Gazella dorcas	Paramyxoviridae_9
Anser anser	Cairina moschata	Parvoviridae_15
Anas platyrhynchos	Anser anser	Parvoviridae_15
Cairina moschata	Anas platyrhynchos	Parvoviridae_15
Anas platyrhynchos	Cairina moschata	Parvoviridae_15
Anas platyrhynchos	Anser	Parvoviridae_15
Anas platyrhynchos	Anser anser domesticus	Parvoviridae_15
Anas platyrhynchos	Cairina moschata	Parvoviridae_15
Anas platyrhynchos	Aix galericulata	Parvoviridae_15
Sus scrofa	Rhinolophus sinicus	Parvoviridae_16
Canis lupus familiaris	Pholidota	Parvoviridae_18
Canis lupus familiaris	Pholidota	Parvoviridae_18
Mustela lutreola	Ailuropoda melanoleuca	Parvoviridae_18
Mustela lutreola	Ailuropoda melanoleuca	Parvoviridae_18
Ailuropoda melanoleuca	Ailurus fulgens	Parvoviridae_18
Canis lupus familiaris	Felis catus	Parvoviridae_18
Felis catus	Prionailurus bengalensis	Parvoviridae_19
Sus scrofa	Rattus norvegicus	Parvoviridae_58
Rattus norvegicus	Rattus rattus	Parvoviridae_58
Rattus norvegicus	Mustela lutreola	Parvoviridae_58
Rattus norvegicus	Rattus flavipectus	Parvoviridae_58
Bos taurus	Rhizomys pruinosus	Peribunyaviridae_16
Bos taurus	Capra hircus	Peribunyaviridae_16
Bos taurus	Ovis aries	Peribunyaviridae_22
Bos taurus	Ovis aries	Peribunyaviridae_22
Bos taurus	Ovis aries	Peribunyaviridae_22
Bos taurus	Ovis aries	Peribunyaviridae_23
Ovis aries	Capra hircus	Peribunyaviridae_23
Homo sapiens	Callithrix penicillata	Peribunyaviridae_37
Homo sapiens	Bradypus tridactylus	Peribunyaviridae_37
Homo sapiens	Bradypus tridactylus	Peribunyaviridae_37
Homo sapiens	Callithrix	Peribunyaviridae_37
Sus scrofa	Homo sapiens	Picobirnaviridae_20
Sus scrofa	Pavo cristatus	Picobirnaviridae_20
Sus scrofa	Homo sapiens	Picobirnaviridae_20
Sus scrofa	Homo sapiens	Picobirnaviridae_35
Sus scrofa	Simiiformes	Picobirnaviridae_35
Sus scrofa	Bos taurus	Picobirnaviridae_8
Sus scrofa	Mus musculus	Picornaviridae_100
Sus scrofa	Bos taurus	Picornaviridae_100
Bos taurus	Bubalus bubalis	Picornaviridae_100
Bos taurus	Ovis aries	Picornaviridae_12
Sus scrofa	Bos taurus	Picornaviridae_12
Bos taurus	Sus scrofa	Picornaviridae_12
Sus scrofa	Bos taurus	Picornaviridae_12
Sus scrofa	Bos taurus	Picornaviridae_12
Bos taurus	Bubalus bubalis	Picornaviridae_12
Bos taurus	Sus scrofa	Picornaviridae_12
Sus scrofa	Bubalus bubalis	Picornaviridae_12
Bos taurus	Capra hircus	Picornaviridae_12
Bos taurus	Sus scrofa	Picornaviridae_12
Bos taurus	Capra hircus	Picornaviridae_12
Bubalus bubalis	Bos taurus	Picornaviridae_12
Bos taurus	Bubalus bubalis	Picornaviridae_12
Bos taurus	Canis lupus familiaris	Picornaviridae_12
Bos taurus	Capra hircus	Picornaviridae_12
Bos taurus	Bubalus bubalis	Picornaviridae_12
Bos taurus	Sus scrofa	Picornaviridae_12
Bubalus bubalis	Bos taurus	Picornaviridae_12
Bos taurus	Bubalus bubalis	Picornaviridae_12
Bubalus bubalis	Bos taurus	Picornaviridae_12
Bubalus bubalis	Bos taurus	Picornaviridae_12
Bubalus bubalis	Bos taurus	Picornaviridae_12
Bos taurus	Bubalus bubalis	Picornaviridae_12
Bubalus bubalis	Bos taurus	Picornaviridae_12
Bubalus bubalis	Bos taurus	Picornaviridae_12
Bos taurus	Bubalus bubalis	Picornaviridae_12
Bos taurus	Bubalus bubalis	Picornaviridae_12
Bos taurus	Sus scrofa	Picornaviridae_12
Sus scrofa	Bubalus bubalis	Picornaviridae_12
Sus scrofa	Bos taurus	Picornaviridae_12
Bos taurus	Ovis aries	Picornaviridae_12
Bos taurus	Bubalus bubalis	Picornaviridae_12
Bos taurus	Bos frontalis	Picornaviridae_12
Bos taurus	Bos frontalis	Picornaviridae_12
Bos taurus	Bubalus bubalis	Picornaviridae_12
Bos taurus	Bubalus bubalis	Picornaviridae_12
Bos taurus	Bubalus bubalis	Picornaviridae_12
Bubalus bubalis	Bos taurus	Picornaviridae_12
Bos taurus	Bubalus bubalis	Picornaviridae_12
Bubalus bubalis	Bos taurus	Picornaviridae_12
Bubalus bubalis	Bos taurus	Picornaviridae_12
Bubalus bubalis	Bos taurus	Picornaviridae_12
Bubalus bubalis	Bos taurus	Picornaviridae_12
Bubalus bubalis	Bos taurus	Picornaviridae_12
Bubalus bubalis	Bos taurus	Picornaviridae_12
Sus scrofa	Bos	Picornaviridae_12
Bos taurus	Bubalus bubalis	Picornaviridae_12
Bos taurus	Bubalus bubalis	Picornaviridae_12
Bubalus bubalis	Bos taurus	Picornaviridae_12
Bos taurus	Bubalus bubalis	Picornaviridae_12
Bubalus bubalis	Bos taurus	Picornaviridae_12
Bubalus bubalis	Bos taurus	Picornaviridae_12
Bos taurus	Bubalus bubalis	Picornaviridae_12
Bos taurus	Bos grunniens	Picornaviridae_12
Bos taurus	Bubalus bubalis	Picornaviridae_12
Bos taurus	Ovis aries	Picornaviridae_12
Bos taurus	Bubalus bubalis	Picornaviridae_12
Bos taurus	Sus scrofa	Picornaviridae_12
Sus scrofa	Bos taurus	Picornaviridae_12
Sus scrofa	Bos taurus	Picornaviridae_12
Sus scrofa	Bos taurus	Picornaviridae_12
Sus scrofa	Bos taurus	Picornaviridae_12
Sus scrofa	Bos taurus	Picornaviridae_12
Bos taurus	Bubalus bubalis	Picornaviridae_12
Bos taurus	Sus scrofa	Picornaviridae_12
Bos taurus	Ovis aries	Picornaviridae_12
Bos taurus	Sus scrofa	Picornaviridae_12
Bos taurus	Ovis aries	Picornaviridae_12
Bos taurus	Ovis aries	Picornaviridae_12
Bos taurus	Ovis aries	Picornaviridae_12
Bos taurus	Ovis aries	Picornaviridae_12
Bos taurus	Ovis aries	Picornaviridae_12
Ovis aries	Bos taurus	Picornaviridae_12
Bos taurus	Ovis aries	Picornaviridae_12
Ovis aries	Bos taurus	Picornaviridae_12
Ovis aries	Bos taurus	Picornaviridae_12
Ovis aries	Bos taurus	Picornaviridae_12
Ovis aries	Bos taurus	Picornaviridae_12
Bos taurus	Ovis aries	Picornaviridae_12
Anatidae	Columbidae	Picornaviridae_14
Cairina moschata	Anas platyrhynchos	Picornaviridae_14
Cairina moschata	Anser	Picornaviridae_14
Cairina moschata	Anas platyrhynchos	Picornaviridae_14
Syncerus caffer	Bos taurus	Picornaviridae_142
Bos taurus	Syncerus caffer	Picornaviridae_142
Syncerus caffer	Bos taurus	Picornaviridae_142
Syncerus caffer	Bos taurus	Picornaviridae_142
Syncerus caffer	Bos taurus	Picornaviridae_142
Syncerus caffer	Bos taurus	Picornaviridae_142
Bos taurus	Syncerus caffer	Picornaviridae_142
Bos taurus	Syncerus caffer	Picornaviridae_142
Bos taurus	Syncerus caffer	Picornaviridae_142
Bos taurus	Syncerus caffer	Picornaviridae_142
Bos taurus	Syncerus caffer	Picornaviridae_142
Sus scrofa	Panthera tigris amoyensis	Picornaviridae_18
Sus scrofa	Pan troglodytes	Picornaviridae_18
Rattus rattus	Loxodonta africana	Picornaviridae_18
Sus scrofa	Rattus rattus	Picornaviridae_18
Sus scrofa	Mus musculus	Picornaviridae_18
Bos taurus	Canis lupus familiaris	Picornaviridae_237
Bos taurus	Canis lupus familiaris	Picornaviridae_237
Bos taurus	Canis lupus familiaris	Picornaviridae_237
Homo sapiens	Rhinopithecus roxellana	Picornaviridae_24
[truncated: 723 more rows]

## Sheet: Supplementary Table 3b
Viral clique	Viral family	Is host jump?	Min. patristic distance	Num. of hosts in viral clique	Num. of genomes in viral clique
Adenoviridae_14	Adenoviridae	FALSE	135.161	2	14
Adenoviridae_14	Adenoviridae	TRUE	336.136	2	14
Adenoviridae_22	Adenoviridae	FALSE	0.044626	2	34
Adenoviridae_22	Adenoviridae	TRUE	5.19133	2	34
Adenoviridae_43	Adenoviridae	FALSE	0.030739	3	12
Adenoviridae_43	Adenoviridae	TRUE	1.00002	3	12
Adenoviridae_5	Adenoviridae	FALSE	1011.98	4	208
Adenoviridae_5	Adenoviridae	TRUE	297.137	4	208
Adenoviridae_53	Adenoviridae	FALSE	4.02372	1	18
Adenoviridae_53	Adenoviridae	TRUE	3.01793	1	18
Adenoviridae_7	Adenoviridae	FALSE	0.046277	1	78
Adenoviridae_7	Adenoviridae	TRUE	0.046277	1	78
Adenoviridae_8	Adenoviridae	FALSE	0.03457	2	56
Adenoviridae_8	Adenoviridae	TRUE	5774.49	2	56
Anelloviridae_2	Anelloviridae	FALSE	0.00284142	4	351
Anelloviridae_2	Anelloviridae	TRUE	1.08571	4	351
Anelloviridae_40	Anelloviridae	FALSE	0.00250094	2	162
Anelloviridae_40	Anelloviridae	TRUE	65.4024	2	162
Anelloviridae_41	Anelloviridae	FALSE	0.00242213	2	95
Anelloviridae_41	Anelloviridae	TRUE	138.15	2	95
Anelloviridae_5	Anelloviridae	FALSE	3.94727	2	62
Anelloviridae_5	Anelloviridae	TRUE	287.161	2	62
Anelloviridae_7	Anelloviridae	FALSE	9.11788	1	19
Anelloviridae_7	Anelloviridae	TRUE	43.8093	1	19
Arenaviridae_23	Arenaviridae	FALSE	6.06918	2	13
Arenaviridae_23	Arenaviridae	TRUE	22.6659	2	13
Arenaviridae_31	Arenaviridae	FALSE	2.08486	4	76
Arenaviridae_31	Arenaviridae	TRUE	63.1033	4	76
Arenaviridae_40	Arenaviridae	FALSE	0.0070437	2	23
Arenaviridae_40	Arenaviridae	TRUE	33.8385	2	23
Arenaviridae_41	Arenaviridae	FALSE	0.00701057	2	16
Arenaviridae_41	Arenaviridae	TRUE	11.0242	2	16
Arenaviridae_42	Arenaviridae	FALSE	0.00692869	2	20
Arenaviridae_42	Arenaviridae	TRUE	42.1016	2	20
Arenaviridae_44	Arenaviridae	FALSE	0.006971	2	31
Arenaviridae_44	Arenaviridae	TRUE	2.04822	2	31
Arenaviridae_61	Arenaviridae	FALSE	484.165	3	15
Arenaviridae_61	Arenaviridae	TRUE	179.184	3	15
Astroviridae_19	Astroviridae	FALSE	3.14762	2	23
Astroviridae_19	Astroviridae	TRUE	261.815	2	23
Astroviridae_24	Astroviridae	FALSE	661.094	2	11
Astroviridae_24	Astroviridae	TRUE	1220.35	2	11
Astroviridae_42	Astroviridae	FALSE	0.939092	2	23
Astroviridae_42	Astroviridae	TRUE	1539.49	2	23
Astroviridae_43	Astroviridae	FALSE	194.002	2	28
Astroviridae_43	Astroviridae	TRUE	337.318	2	28
Birnaviridae_1	Birnaviridae	FALSE	0.00287969	2	167
Birnaviridae_1	Birnaviridae	TRUE	103.183	2	167
Birnaviridae_3	Birnaviridae	FALSE	0.00279152	5	118
Birnaviridae_3	Birnaviridae	TRUE	0.00279152	5	118
Caliciviridae_1	Caliciviridae	FALSE	2.00107	4	105
Caliciviridae_1	Caliciviridae	TRUE	3.06953	4	105
Caliciviridae_36	Caliciviridae	FALSE	4.08751	2	27
Caliciviridae_36	Caliciviridae	TRUE	32.9934	2	27
Circoviridae_102	Circoviridae	FALSE	0.00206165	6	813
Circoviridae_102	Circoviridae	TRUE	0.690426	6	813
Circoviridae_113	Circoviridae	FALSE	33.6615	4	11
Circoviridae_113	Circoviridae	TRUE	1.13292	4	11
Circoviridae_16	Circoviridae	FALSE	0.00201903	3	128
Circoviridae_16	Circoviridae	TRUE	3.04326	3	128
Circoviridae_204	Circoviridae	FALSE	0.00173341	5	67
Circoviridae_204	Circoviridae	TRUE	1.02009	5	67
Circoviridae_21	Circoviridae	FALSE	0.00590373	2	59
Circoviridae_21	Circoviridae	TRUE	1055.2	2	59
Circoviridae_3	Circoviridae	FALSE	0.00201081	3	211
Circoviridae_3	Circoviridae	TRUE	0.989149	3	211
Circoviridae_30	Circoviridae	FALSE	0.00326656	4	260
Circoviridae_30	Circoviridae	TRUE	15.364	4	260
Circoviridae_4	Circoviridae	FALSE	3.61171	40	396
Circoviridae_4	Circoviridae	TRUE	0.00249738	40	396
Circoviridae_5	Circoviridae	FALSE	0.00214228	2	366
Circoviridae_5	Circoviridae	TRUE	152.552	2	366
Coronaviridae_12	Coronaviridae	FALSE	0.0957908	20	1579
Coronaviridae_12	Coronaviridae	TRUE	0.0358873	20	1579
Coronaviridae_18	Coronaviridae	FALSE	0.0284573	4	202
Coronaviridae_18	Coronaviridae	TRUE	14.6756	4	202
Coronaviridae_2	Coronaviridae	FALSE	0.0863544	6	70
Coronaviridae_2	Coronaviridae	TRUE	22.8921	6	70
Coronaviridae_26	Coronaviridae	FALSE	0.0306676	4	579
Coronaviridae_26	Coronaviridae	TRUE	0.0306676	4	579
Coronaviridae_3	Coronaviridae	FALSE	0.034365	6	183
Coronaviridae_3	Coronaviridae	TRUE	10.8728	6	183
Coronaviridae_4	Coronaviridae	FALSE	73.7452	16	411
Coronaviridae_4	Coronaviridae	TRUE	3.33027	16	411
Coronaviridae_40	Coronaviridae	FALSE	31.2769	2	14
Coronaviridae_40	Coronaviridae	TRUE	1065.18	2	14
Coronaviridae_5	Coronaviridae	FALSE	0.0314631	6	75
Coronaviridae_5	Coronaviridae	TRUE	2.21371	6	75
Coronaviridae_6	Coronaviridae	FALSE	0.0327263	2	584
Coronaviridae_6	Coronaviridae	TRUE	1326.64	2	584
Filoviridae_1	Filoviridae	FALSE	0.019115	3	30
Filoviridae_1	Filoviridae	TRUE	42.9718	3	30
Filoviridae_6	Filoviridae	FALSE	0.018891	3	18
Filoviridae_6	Filoviridae	TRUE	10.0688	3	18
Filoviridae_8	Filoviridae	FALSE	0.019007	2	391
Filoviridae_8	Filoviridae	TRUE	0.019007	2	391
Flaviviridae_10	Flaviviridae	FALSE	0.0112102	7	120
Flaviviridae_10	Flaviviridae	TRUE	1.0361	7	120
Flaviviridae_12	Flaviviridae	FALSE	0.011094	9	170
Flaviviridae_12	Flaviviridae	TRUE	0.011094	9	170
Flaviviridae_13	Flaviviridae	FALSE	0.011783	56	1389
Flaviviridae_13	Flaviviridae	TRUE	0.011783	56	1389
Flaviviridae_167	Flaviviridae	FALSE	3.03586	3	22
Flaviviridae_167	Flaviviridae	TRUE	5.04877	3	22
Flaviviridae_18	Flaviviridae	FALSE	0.0112052	17	162
Flaviviridae_18	Flaviviridae	TRUE	0.0112052	17	162
Flaviviridae_19	Flaviviridae	FALSE	0.0111174	35	268
Flaviviridae_19	Flaviviridae	TRUE	0.0111174	35	268
Flaviviridae_25	Flaviviridae	FALSE	2.07498	4	26
Flaviviridae_25	Flaviviridae	TRUE	416.776	4	26
Flaviviridae_28	Flaviviridae	FALSE	15.481	2	20
Flaviviridae_28	Flaviviridae	TRUE	16.9794	2	20
Flaviviridae_32	Flaviviridae	FALSE	0.012985	2	44
Flaviviridae_32	Flaviviridae	TRUE	635.183	2	44
Flaviviridae_35	Flaviviridae	FALSE	0.01135	12	63
Flaviviridae_35	Flaviviridae	TRUE	66.9494	12	63
Flaviviridae_4	Flaviviridae	FALSE	0.0111907	12	172
Flaviviridae_4	Flaviviridae	TRUE	3.22608	12	172
Flaviviridae_56	Flaviviridae	FALSE	5.39979	1	17
Flaviviridae_56	Flaviviridae	TRUE	633.202	1	17
Flaviviridae_7	Flaviviridae	FALSE	0.0112107	12	71
Flaviviridae_7	Flaviviridae	TRUE	6.45292	12	71
Flaviviridae_73	Flaviviridae	FALSE	654.325	2	15
Flaviviridae_73	Flaviviridae	TRUE	675.803	2	15
Genomoviridae_21	Genomoviridae	FALSE	11.0721	14	28
Genomoviridae_21	Genomoviridae	TRUE	21.7863	14	28
Genomoviridae_53	Genomoviridae	FALSE	2.67007	5	11
Genomoviridae_53	Genomoviridae	TRUE	33.0098	5	11
Genomoviridae_81	Genomoviridae	FALSE	267.35	6	18
Genomoviridae_81	Genomoviridae	TRUE	326.986	6	18
Hepadnaviridae_10	Hepadnaviridae	FALSE	0.00320243	2	54
Hepadnaviridae_10	Hepadnaviridae	TRUE	31.5423	2	54
Hepadnaviridae_11	Hepadnaviridae	FALSE	0.00322583	2	10
Hepadnaviridae_11	Hepadnaviridae	TRUE	2.0654	2	10
Hepadnaviridae_2	Hepadnaviridae	FALSE	0.00647979	2	66
Hepadnaviridae_2	Hepadnaviridae	TRUE	3451.12	2	66
Hepadnaviridae_3	Hepadnaviridae	FALSE	10.3475	4	19
Hepadnaviridae_3	Hepadnaviridae	TRUE	8.6018	4	19
Hepadnaviridae_5	Hepadnaviridae	FALSE	0.00366567	4	62
Hepadnaviridae_5	Hepadnaviridae	TRUE	0.00366567	4	62
Hepeviridae_1	Hepeviridae	FALSE	0.008001	3	141
Hepeviridae_1	Hepeviridae	TRUE	57.0129	3	141
Hepeviridae_10	Hepeviridae	FALSE	43.2962	2	15
Hepeviridae_10	Hepeviridae	TRUE	407.676	2	15
Hepeviridae_12	Hepeviridae	FALSE	260.172	2	19
Hepeviridae_12	Hepeviridae	TRUE	14.2354	2	19
Hepeviridae_14	Hepeviridae	FALSE	590.298	3	13
Hepeviridae_14	Hepeviridae	TRUE	0.95097	3	13
Hepeviridae_18	Hepeviridae	FALSE	14.4703	2	25
Hepeviridae_18	Hepeviridae	TRUE	234.158	2	25
Hepeviridae_2	Hepeviridae	FALSE	3.32242	3	244
Hepeviridae_2	Hepeviridae	TRUE	0.00910724	3	244
Hepeviridae_3	Hepeviridae	FALSE	0.00738274	4	122
Hepeviridae_3	Hepeviridae	TRUE	185.295	4	122
Hepeviridae_4	Hepeviridae	FALSE	1.97139	6	113
Hepeviridae_4	Hepeviridae	TRUE	5.89752	6	113
Hepeviridae_6	Hepeviridae	FALSE	1.01546	2	23
Hepeviridae_6	Hepeviridae	TRUE	27.7763	2	23
Herpesviridae_17	Herpesviridae	FALSE	4.47417	3	44
Herpesviridae_17	Herpesviridae	TRUE	4642.06	3	44
Herpesviridae_31	Herpesviridae	FALSE	1.14536	3	45
Herpesviridae_31	Herpesviridae	TRUE	556.073	3	45
Herpesviridae_4	Herpesviridae	FALSE	13.7628	7	49
Herpesviridae_4	Herpesviridae	TRUE	7.07338	7	49
Orthomyxoviridae_1	Orthomyxoviridae	FALSE	2.12542	49	2335
Orthomyxoviridae_1	Orthomyxoviridae	TRUE	0.00239896	49	2335
Orthomyxoviridae_11	Orthomyxoviridae	FALSE	0.007089	3	130
Orthomyxoviridae_11	Orthomyxoviridae	TRUE	4.55042	3	130
Orthomyxoviridae_2	Orthomyxoviridae	FALSE	15.9008	4	58
Orthomyxoviridae_2	Orthomyxoviridae	TRUE	14.8307	4	58
Orthomyxoviridae_4	Orthomyxoviridae	FALSE	0.00240573	3	2610
Orthomyxoviridae_4	Orthomyxoviridae	TRUE	2.22848	3	2610
Orthomyxoviridae_8	Orthomyxoviridae	FALSE	0.002336	2	161
Orthomyxoviridae_8	Orthomyxoviridae	TRUE	1.01936	2	161
Papillomaviridae_67	Papillomaviridae	FALSE	0.016328	2	10
Papillomaviridae_67	Papillomaviridae	TRUE	410.787	2	10
Papillomaviridae_73	Papillomaviridae	FALSE	0.008952	3	185
Papillomaviridae_73	Papillomaviridae	TRUE	0.008952	3	185
Paramyxoviridae_12	Paramyxoviridae	FALSE	15.3641	6	42
Paramyxoviridae_12	Paramyxoviridae	TRUE	13.0544	6	42
Paramyxoviridae_16	Paramyxoviridae	FALSE	2.06205	9	170
Paramyxoviridae_16	Paramyxoviridae	TRUE	0.0155657	9	170
Paramyxoviridae_17	Paramyxoviridae	FALSE	0.0162641	2	24
Paramyxoviridae_17	Paramyxoviridae	TRUE	39.7854	2	24
Paramyxoviridae_19	Paramyxoviridae	FALSE	45.8409	2	12
Paramyxoviridae_19	Paramyxoviridae	TRUE	0.018234	2	12
Paramyxoviridae_23	Paramyxoviridae	FALSE	91.2608	2	25
Paramyxoviridae_23	Paramyxoviridae	TRUE	5.27619	2	25
Paramyxoviridae_3	Paramyxoviridae	FALSE	1.02838	17	112
Paramyxoviridae_3	Paramyxoviridae	TRUE	1.04287	17	112
Paramyxoviridae_30	Paramyxoviridae	FALSE	0.0143855	7	48
Paramyxoviridae_30	Paramyxoviridae	TRUE	11.0732	7	48
Paramyxoviridae_4	Paramyxoviridae	FALSE	0.0417993	4	147
Paramyxoviridae_4	Paramyxoviridae	TRUE	37.8746	4	147
Paramyxoviridae_5	Paramyxoviridae	FALSE	0.0159221	31	726
Paramyxoviridae_5	Paramyxoviridae	TRUE	0.0159221	31	726
Paramyxoviridae_61	Paramyxoviridae	FALSE	0.0158868	3	92
Paramyxoviridae_61	Paramyxoviridae	TRUE	5.07003	3	92
Paramyxoviridae_7	Paramyxoviridae	FALSE	0.018252	4	51
Paramyxoviridae_7	Paramyxoviridae	TRUE	0.018252	4	51
Paramyxoviridae_8	Paramyxoviridae	FALSE	13.0442	4	13
Paramyxoviridae_8	Paramyxoviridae	TRUE	554.79	4	13
Paramyxoviridae_9	Paramyxoviridae	FALSE	2.13737	6	92
Paramyxoviridae_9	Paramyxoviridae	TRUE	1.04446	6	92
Parvoviridae_15	Parvoviridae	FALSE	1.15048	4	87
Parvoviridae_15	Parvoviridae	TRUE	68.5215	4	87
Parvoviridae_16	Parvoviridae	FALSE	117.118	2	21
Parvoviridae_16	Parvoviridae	TRUE	406.917	2	21
Parvoviridae_18	Parvoviridae	FALSE	0.00618457	7	96
Parvoviridae_18	Parvoviridae	TRUE	0.00618457	7	96
Parvoviridae_19	Parvoviridae	FALSE	0.00562911	2	27
Parvoviridae_19	Parvoviridae	TRUE	44.243	2	27
Parvoviridae_58	Parvoviridae	FALSE	0.883399	3	10
Parvoviridae_58	Parvoviridae	TRUE	31.935	3	10
Peribunyaviridae_16	Peribunyaviridae	FALSE	0.0070162	8	18
Peribunyaviridae_16	Peribunyaviridae	TRUE	136.607	8	18
Peribunyaviridae_22	Peribunyaviridae	FALSE	0.006882	3	31
Peribunyaviridae_22	Peribunyaviridae	TRUE	7.06789	3	31
Peribunyaviridae_23	Peribunyaviridae	FALSE	0.00701512	6	15
Peribunyaviridae_23	Peribunyaviridae	TRUE	1.03292	6	15
Peribunyaviridae_37	Peribunyaviridae	FALSE	0.00690485	6	73
Peribunyaviridae_37	Peribunyaviridae	TRUE	8.85603	6	73
Picobirnaviridae_20	Picobirnaviridae	FALSE	0.00228948	3	25
Picobirnaviridae_20	Picobirnaviridae	TRUE	314.063	3	25
Picobirnaviridae_35	Picobirnaviridae	FALSE	14.5028	2	16
Picobirnaviridae_35	Picobirnaviridae	TRUE	39.444	2	16
Picobirnaviridae_8	Picobirnaviridae	FALSE	240.597	3	15
Picobirnaviridae_8	Picobirnaviridae	TRUE	287.829	3	15
Picornaviridae_100	Picornaviridae	FALSE	0.0165836	4	187
Picornaviridae_100	Picornaviridae	TRUE	0.0172412	4	187
Picornaviridae_12	Picornaviridae	FALSE	973.77	6	495
Picornaviridae_12	Picornaviridae	TRUE	0.00944987	6	495
Picornaviridae_14	Picornaviridae	FALSE	4.06145	2	55
Picornaviridae_14	Picornaviridae	TRUE	17.5307	2	55
Picornaviridae_142	Picornaviridae	FALSE	452.684	2	65
Picornaviridae_142	Picornaviridae	TRUE	218.604	2	65
Picornaviridae_18	Picornaviridae	FALSE	3.08919	6	16
Picornaviridae_18	Picornaviridae	TRUE	2.19086	6	16
Picornaviridae_237	Picornaviridae	FALSE	1.29678	2	32
Picornaviridae_237	Picornaviridae	TRUE	1136.67	2	32
Picornaviridae_24	Picornaviridae	FALSE	13.5121	2	41
Picornaviridae_24	Picornaviridae	TRUE	70.4033	2	41
Picornaviridae_25	Picornaviridae	FALSE	0.007473	2	169
Picornaviridae_25	Picornaviridae	TRUE	45.1317	2	169
Picornaviridae_30	Picornaviridae	FALSE	88.7261	2	11
Picornaviridae_30	Picornaviridae	TRUE	326.002	2	11
Picornaviridae_44	Picornaviridae	FALSE	264.535	3	22
Picornaviridae_44	Picornaviridae	TRUE	359.063	3	22
Pneumoviridae_2	Pneumoviridae	FALSE	0.0133883	3	65
Pneumoviridae_2	Pneumoviridae	TRUE	35.6228	3	65
Pneumoviridae_4	Pneumoviridae	FALSE	0.0164939	1	1007
Pneumoviridae_4	Pneumoviridae	TRUE	28.8815	1	1007
Pneumoviridae_6	Pneumoviridae	FALSE	0.0156137	1	876
Pneumoviridae_6	Pneumoviridae	TRUE	13.4489	1	876
Polyomaviridae_18	Polyomaviridae	FALSE	1.55273	7	24
Polyomaviridae_18	Polyomaviridae	TRUE	1.55028	7	24
Polyomaviridae_26	Polyomaviridae	FALSE	0.010508	3	35
Polyomaviridae_26	Polyomaviridae	TRUE	1.00749	3	35
Poxviridae_12	Poxviridae	FALSE	0.100494	9	11
Poxviridae_12	Poxviridae	TRUE	1.71986	9	11
Poxviridae_2	Poxviridae	FALSE	0.0998551	20	428
Poxviridae_2	Poxviridae	TRUE	0.0998551	20	428
Poxviridae_3	Poxviridae	FALSE	0.0898075	3	109
Poxviridae_3	Poxviridae	TRUE	101.32	3	109
Poxviridae_7	Poxviridae	FALSE	0.198967	3	65
Poxviridae_7	Poxviridae	TRUE	0.0994835	3	65
Poxviridae_8	Poxviridae	FALSE	0.0939451	8	20
Poxviridae_8	Poxviridae	TRUE	9.483	8	20
Rhabdoviridae_1	Rhabdoviridae	FALSE	22.4799	25	136
Rhabdoviridae_1	Rhabdoviridae	TRUE	0.0110395	25	136
Rhabdoviridae_10	Rhabdoviridae	FALSE	0.0146939	26	798
Rhabdoviridae_10	Rhabdoviridae	TRUE	0.0146939	26	798
Rhabdoviridae_13	Rhabdoviridae	FALSE	0.0119687	10	722
Rhabdoviridae_13	Rhabdoviridae	TRUE	0.0119687	10	722
Rhabdoviridae_22	Rhabdoviridae	FALSE	2.03413	3	32
Rhabdoviridae_22	Rhabdoviridae	TRUE	15.5681	3	32
Rhabdoviridae_3	Rhabdoviridae	FALSE	21.9792	8	68
Rhabdoviridae_3	Rhabdoviridae	TRUE	0.011937	8	68
Rhabdoviridae_36	Rhabdoviridae	FALSE	41.9117	2	17
Rhabdoviridae_36	Rhabdoviridae	TRUE	45.8467	2	17
Rhabdoviridae_5	Rhabdoviridae	FALSE	1.00022	5	58
Rhabdoviridae_5	Rhabdoviridae	TRUE	1.00022	5	58
Rhabdoviridae_51	Rhabdoviridae	FALSE	0.022356	3	48
Rhabdoviridae_51	Rhabdoviridae	TRUE	3.00445	3	48
Rhabdoviridae_6	Rhabdoviridae	FALSE	7.99739	2	30
Rhabdoviridae_6	Rhabdoviridae	TRUE	69.6925	2	30
Rhabdoviridae_9	Rhabdoviridae	FALSE	16.0723	21	106
Rhabdoviridae_9	Rhabdoviridae	TRUE	0.00653494	21	106
Smacoviridae_19	Smacoviridae	FALSE	0.00257233	2	11
Smacoviridae_19	Smacoviridae	TRUE	299.546	2	11
Togaviridae_1	Togaviridae	FALSE	0.0143802	5	583
Togaviridae_1	Togaviridae	TRUE	6.30724	5	583
Togaviridae_10	Togaviridae	FALSE	1.00031	3	12
Togaviridae_10	Togaviridae	TRUE	4.07966	3	12
Togaviridae_13	Togaviridae	FALSE	0.011545	7	49
Togaviridae_13	Togaviridae	TRUE	9.12086	7	49
Togaviridae_14	Togaviridae	FALSE	0.0114819	6	55
Togaviridae_14	Togaviridae	TRUE	4.07022	6	55
Togaviridae_17	Togaviridae	FALSE	0.011712	5	27
Togaviridae_17	Togaviridae	TRUE	9.82152	5	27
Togaviridae_18	Togaviridae	FALSE	0.011786	40	452
Togaviridae_18	Togaviridae	TRUE	1.01381	40	452
Togaviridae_2	Togaviridae	FALSE	0.0115831	8	69
Togaviridae_2	Togaviridae	TRUE	2.08162	8	69
Togaviridae_4	Togaviridae	FALSE	7.10217	5	26
Togaviridae_4	Togaviridae	TRUE	20.3615	5	26
Togaviridae_7	Togaviridae	FALSE	0.011699	9	47
Togaviridae_7	Togaviridae	TRUE	32.9171	9	47
Togaviridae_8	Togaviridae	FALSE	0.048184	8	21
Togaviridae_8	Togaviridae	TRUE	2.03927	8	21
Togaviridae_9	Togaviridae	FALSE	0.0249631	10	171
Togaviridae_9	Togaviridae	TRUE	0.011823	10	171

## Sheet: Supplementary Table 3c
Viral clique	Viral family	Is host jump?	Associated patristic distance	Min. dN/dS	Num. of hosts in viral clique	Num. of genomes in viral clique
Adenoviridae_14	Adenoviridae	FALSE	401.902	0.0899901	2	14
Adenoviridae_14	Adenoviridae	TRUE	504.504	0.109715	2	14
Adenoviridae_22	Adenoviridae	FALSE	8.10887	0.170315	2	34
Adenoviridae_43	Adenoviridae	TRUE	76.5387	0.177918	3	12
Adenoviridae_5	Adenoviridae	TRUE	297.137	0.153383	4	208
Adenoviridae_53	Adenoviridae	FALSE	5.15776	0.141681	1	18
Adenoviridae_7	Adenoviridae	FALSE	8.85474	0.0670915	1	78
Adenoviridae_7	Adenoviridae	TRUE	6.40577	0.687105	1	78
Adenoviridae_8	Adenoviridae	FALSE	6.71373	0.0976181	2	56
Adenoviridae_8	Adenoviridae	TRUE	5774.49	0.160376	2	56
Anelloviridae_2	Anelloviridae	FALSE	155.112	0.0209214	4	351
Anelloviridae_2	Anelloviridae	TRUE	29.2331	0.0583004	4	351
Anelloviridae_40	Anelloviridae	FALSE	121.14	0.0202645	2	162
Anelloviridae_40	Anelloviridae	TRUE	130.878	0.0790745	2	162
Anelloviridae_41	Anelloviridae	FALSE	93.1731	0.0653943	2	95
Anelloviridae_41	Anelloviridae	TRUE	138.15	0.120923	2	95
Anelloviridae_5	Anelloviridae	FALSE	158.449	0.0216581	2	62
Anelloviridae_5	Anelloviridae	TRUE	287.161	0.104246	2	62
Anelloviridae_7	Anelloviridae	FALSE	113.167	0.0960799	1	19
Anelloviridae_7	Anelloviridae	TRUE	197.956	0.179534	1	19
Arenaviridae_23	Arenaviridae	FALSE	29.9625	0.074353	2	13
Arenaviridae_23	Arenaviridae	TRUE	22.6659	0.123148	2	13
Arenaviridae_31	Arenaviridae	FALSE	88.8786	0.05459	4	76
Arenaviridae_31	Arenaviridae	TRUE	110.102	0.0953462	4	76
Arenaviridae_40	Arenaviridae	FALSE	73.4682	0.13977	2	23
Arenaviridae_40	Arenaviridae	TRUE	33.8385	0.258712	2	23
Arenaviridae_41	Arenaviridae	FALSE	606.036	0.0937844	2	16
Arenaviridae_41	Arenaviridae	TRUE	76.7773	0.150506	2	16
Arenaviridae_42	Arenaviridae	FALSE	12.4589	0.0705405	2	20
Arenaviridae_42	Arenaviridae	TRUE	42.1016	0.288749	2	20
Arenaviridae_44	Arenaviridae	FALSE	362.145	0.0536143	2	31
Arenaviridae_61	Arenaviridae	FALSE	484.165	0.129951	3	15
Arenaviridae_61	Arenaviridae	TRUE	443.326	0.117805	3	15
Astroviridae_19	Astroviridae	FALSE	207.776	0.0562328	2	23
Astroviridae_19	Astroviridae	TRUE	261.815	0.0872601	2	23
Astroviridae_24	Astroviridae	FALSE	2352.95	0.0462447	2	11
Astroviridae_24	Astroviridae	TRUE	1220.35	0.0446765	2	11
Astroviridae_42	Astroviridae	FALSE	238.969	0.02553	2	23
Astroviridae_42	Astroviridae	TRUE	1539.49	0.175978	2	23
Astroviridae_43	Astroviridae	FALSE	2470.32	0.0520954	2	28
Astroviridae_43	Astroviridae	TRUE	1076.97	0.0501274	2	28
Birnaviridae_1	Birnaviridae	FALSE	63.1832	0.00925962	2	167
Birnaviridae_1	Birnaviridae	TRUE	103.183	0.0490334	2	167
Birnaviridae_3	Birnaviridae	FALSE	36.3426	0.0175985	5	118
Birnaviridae_3	Birnaviridae	TRUE	17.8675	0.0275629	5	118
Caliciviridae_1	Caliciviridae	FALSE	20.2146	0.0203929	4	105
Caliciviridae_1	Caliciviridae	TRUE	607.646	0.0414735	4	105
Caliciviridae_36	Caliciviridae	FALSE	15.5679	0.0387165	2	27
Caliciviridae_36	Caliciviridae	TRUE	50.8684	0.183199	2	27
Circoviridae_102	Circoviridae	FALSE	10.8152	0.0260596	6	813
Circoviridae_102	Circoviridae	TRUE	8.35572	0.125238	6	813
Circoviridae_113	Circoviridae	FALSE	95.8588	0.168147	4	11
Circoviridae_113	Circoviridae	TRUE	29.6249	0.0441046	4	11
Circoviridae_16	Circoviridae	FALSE	33.4875	0.0212478	3	128
Circoviridae_16	Circoviridae	TRUE	115.294	0.0324497	3	128
Circoviridae_204	Circoviridae	FALSE	8.02789	0.0713817	5	67
Circoviridae_204	Circoviridae	TRUE	14.4952	0.169074	5	67
Circoviridae_21	Circoviridae	FALSE	196.157	0.0221721	2	59
Circoviridae_21	Circoviridae	TRUE	1101.66	0.0569019	2	59
Circoviridae_3	Circoviridae	FALSE	18.9547	0.0221845	3	211
Circoviridae_3	Circoviridae	TRUE	24.3829	0.0177811	3	211
Circoviridae_30	Circoviridae	FALSE	435.833	0.0594508	4	260
Circoviridae_30	Circoviridae	TRUE	71.5039	0.0525919	4	260
Circoviridae_4	Circoviridae	FALSE	20.3931	0.0750805	40	396
Circoviridae_4	Circoviridae	TRUE	28.9235	0.0284719	40	396
Circoviridae_5	Circoviridae	FALSE	21.7614	0.0139204	2	366
Circoviridae_5	Circoviridae	TRUE	152.552	0.0789113	2	366
Coronaviridae_12	Coronaviridae	FALSE	5.98879	0.0486797	20	1579
Coronaviridae_12	Coronaviridae	TRUE	13.9823	0.0674787	20	1579
Coronaviridae_18	Coronaviridae	FALSE	24.4477	0.0233358	4	202
Coronaviridae_18	Coronaviridae	TRUE	155.48	0.0286092	4	202
Coronaviridae_2	Coronaviridae	FALSE	7.83862	0.0375904	6	70
Coronaviridae_2	Coronaviridae	TRUE	22.8921	0.582515	6	70
Coronaviridae_26	Coronaviridae	FALSE	4.06208	0.11054	4	579
Coronaviridae_26	Coronaviridae	TRUE	4.18087	0.0546169	4	579
Coronaviridae_3	Coronaviridae	FALSE	2619.6	0.0306688	6	183
Coronaviridae_3	Coronaviridae	TRUE	1758.82	0.0335083	6	183
Coronaviridae_4	Coronaviridae	FALSE	73.7452	0.17063	16	411
Coronaviridae_4	Coronaviridae	TRUE	50.9144	0.0520372	16	411
Coronaviridae_40	Coronaviridae	FALSE	31.2769	0.0983923	2	14
Coronaviridae_40	Coronaviridae	TRUE	1528.55	0.0878012	2	14
Coronaviridae_5	Coronaviridae	FALSE	1567.64	0.0762954	6	75
Coronaviridae_5	Coronaviridae	TRUE	6995.91	0.106562	6	75
Coronaviridae_6	Coronaviridae	FALSE	4458.93	0.0955643	2	584
Coronaviridae_6	Coronaviridae	TRUE	3528.17	0.151638	2	584
Filoviridae_1	Filoviridae	FALSE	138.2	0.123335	3	30
Filoviridae_1	Filoviridae	TRUE	68.1974	0.106658	3	30
Filoviridae_6	Filoviridae	FALSE	14.1054	0.0986152	3	18
Filoviridae_6	Filoviridae	TRUE	747.791	0.184323	3	18
Filoviridae_8	Filoviridae	FALSE	1.19017	0.171167	2	391
Filoviridae_8	Filoviridae	TRUE	480.865	0.0724212	2	391
Flaviviridae_10	Flaviviridae	FALSE	108.623	0.0184312	7	120
Flaviviridae_10	Flaviviridae	TRUE	2146.29	0.0257484	7	120
Flaviviridae_12	Flaviviridae	FALSE	8.1938	0.0657667	9	170
Flaviviridae_12	Flaviviridae	TRUE	14.3497	0.0292489	9	170
Flaviviridae_13	Flaviviridae	FALSE	22.5074	0.00987543	56	1389
Flaviviridae_13	Flaviviridae	TRUE	44.0805	0.0139093	56	1389
Flaviviridae_167	Flaviviridae	FALSE	1342.8	0.0472789	3	22
Flaviviridae_167	Flaviviridae	TRUE	5.04877	0.517228	3	22
Flaviviridae_18	Flaviviridae	FALSE	23.7653	0.0240854	17	162
Flaviviridae_18	Flaviviridae	TRUE	267.402	0.033098	17	162
Flaviviridae_19	Flaviviridae	FALSE	35.135	0.011642	35	268
Flaviviridae_19	Flaviviridae	TRUE	221.968	0.0169005	35	268
Flaviviridae_25	Flaviviridae	FALSE	314.829	0.0396431	4	26
Flaviviridae_25	Flaviviridae	TRUE	417.804	0.0287901	4	26
Flaviviridae_28	Flaviviridae	FALSE	1200.33	0.09519	2	20
Flaviviridae_28	Flaviviridae	TRUE	16.9794	1.99195	2	20
Flaviviridae_32	Flaviviridae	FALSE	556.499	0.0770394	2	44
Flaviviridae_32	Flaviviridae	TRUE	635.183	0.120034	2	44
Flaviviridae_35	Flaviviridae	FALSE	287.595	0.0340805	12	63
Flaviviridae_35	Flaviviridae	TRUE	67.3958	0.0334113	12	63
Flaviviridae_4	Flaviviridae	FALSE	46.0971	0.0116468	12	172
Flaviviridae_4	Flaviviridae	TRUE	87.3972	0.0633655	12	172
Flaviviridae_56	Flaviviridae	FALSE	391.055	0.0834447	1	17
Flaviviridae_56	Flaviviridae	TRUE	633.202	0.153831	1	17
Flaviviridae_7	Flaviviridae	FALSE	362.133	0.0398446	12	71
Flaviviridae_7	Flaviviridae	TRUE	260.486	0.0460013	12	71
Flaviviridae_73	Flaviviridae	FALSE	831.998	0.0946704	2	15
Flaviviridae_73	Flaviviridae	TRUE	675.803	0.132149	2	15
Genomoviridae_21	Genomoviridae	FALSE	33.2334	0.0246025	14	28
Genomoviridae_21	Genomoviridae	TRUE	218.584	0.0144944	14	28
Genomoviridae_53	Genomoviridae	FALSE	42.3107	0.0999329	5	11
Genomoviridae_53	Genomoviridae	TRUE	33.0098	0.0384924	5	11
Genomoviridae_81	Genomoviridae	FALSE	267.35	0.271492	6	18
Genomoviridae_81	Genomoviridae	TRUE	326.986	0.149745	6	18
Hepadnaviridae_10	Hepadnaviridae	FALSE	66.0117	0.0562807	2	54
Hepadnaviridae_10	Hepadnaviridae	TRUE	31.5423	0.266115	2	54
Hepadnaviridae_2	Hepadnaviridae	FALSE	76.5569	0.182633	2	66
Hepadnaviridae_2	Hepadnaviridae	TRUE	3452.79	0.371113	2	66
Hepadnaviridae_3	Hepadnaviridae	FALSE	142.144	0.161232	4	19
Hepadnaviridae_3	Hepadnaviridae	TRUE	165.084	0.217968	4	19
Hepadnaviridae_5	Hepadnaviridae	FALSE	8.52275	0.183271	4	62
Hepadnaviridae_5	Hepadnaviridae	TRUE	46.4492	0.042174	4	62
Hepeviridae_1	Hepeviridae	FALSE	61.2653	0.00931987	3	141
Hepeviridae_1	Hepeviridae	TRUE	57.0129	0.0186883	3	141
Hepeviridae_10	Hepeviridae	FALSE	657.256	0.0631626	2	15
Hepeviridae_10	Hepeviridae	TRUE	407.676	0.0599651	2	15
Hepeviridae_12	Hepeviridae	FALSE	1307.13	0.0435749	2	19
Hepeviridae_12	Hepeviridae	TRUE	1462.4	0.0520463	2	19
Hepeviridae_14	Hepeviridae	FALSE	824.378	0.0598575	3	13
Hepeviridae_14	Hepeviridae	TRUE	788.776	0.0436097	3	13
Hepeviridae_18	Hepeviridae	FALSE	195.094	0.0228974	2	25
Hepeviridae_18	Hepeviridae	TRUE	445.727	0.0462998	2	25
Hepeviridae_2	Hepeviridae	FALSE	53.4879	0.0214401	3	244
Hepeviridae_2	Hepeviridae	TRUE	610.474	0.0311587	3	244
Hepeviridae_3	Hepeviridae	FALSE	1279.46	0.0197315	4	122
Hepeviridae_3	Hepeviridae	TRUE	185.295	0.0234477	4	122
Hepeviridae_4	Hepeviridae	FALSE	131.062	0.0149378	6	113
Hepeviridae_4	Hepeviridae	TRUE	126.268	0.0340581	6	113
Hepeviridae_6	Hepeviridae	FALSE	81.4358	0.0839739	2	23
Hepeviridae_6	Hepeviridae	TRUE	57.6721	0.0518461	2	23
Herpesviridae_17	Herpesviridae	FALSE	1372.93	0.173797	3	44
Herpesviridae_17	Herpesviridae	TRUE	4642.06	0.701914	3	44
Herpesviridae_31	Herpesviridae	FALSE	20.8443	0.155036	3	45
Herpesviridae_31	Herpesviridae	TRUE	556.073	0.331599	3	45
Herpesviridae_4	Herpesviridae	FALSE	40.4744	0.292655	7	49
Herpesviridae_4	Herpesviridae	TRUE	879.696	0.340007	7	49
Orthomyxoviridae_1	Orthomyxoviridae	FALSE	40.1066	0.126264	49	2335
Orthomyxoviridae_1	Orthomyxoviridae	TRUE	105.535	0.00406468	49	2335
Orthomyxoviridae_11	Orthomyxoviridae	FALSE	42.6457	0.0112306	3	130
Orthomyxoviridae_11	Orthomyxoviridae	TRUE	58.9483	0.04274	3	130
Orthomyxoviridae_2	Orthomyxoviridae	FALSE	25.7921	0.0143231	4	58
Orthomyxoviridae_2	Orthomyxoviridae	TRUE	80.5111	0.0224178	4	58
Orthomyxoviridae_4	Orthomyxoviridae	FALSE	64.9399	0.0101596	3	2610
Orthomyxoviridae_4	Orthomyxoviridae	TRUE	2.22848	0.476817	3	2610
Orthomyxoviridae_8	Orthomyxoviridae	FALSE	31.596	0.0132118	2	161
Orthomyxoviridae_8	Orthomyxoviridae	TRUE	6.1498	0.106327	2	161
Papillomaviridae_67	Papillomaviridae	TRUE	410.812	0.138966	2	10
Papillomaviridae_73	Papillomaviridae	FALSE	5.14465	0.0996711	3	185
Papillomaviridae_73	Papillomaviridae	TRUE	5.13264	0.0986791	3	185
Paramyxoviridae_12	Paramyxoviridae	FALSE	222.709	0.0554852	6	42
Paramyxoviridae_12	Paramyxoviridae	TRUE	25.8021	0.0325103	6	42
Paramyxoviridae_16	Paramyxoviridae	FALSE	73.2234	0.0272238	9	170
Paramyxoviridae_16	Paramyxoviridae	TRUE	54.7423	0.0402193	9	170
Paramyxoviridae_17	Paramyxoviridae	FALSE	27.5331	0.0874932	2	24
Paramyxoviridae_17	Paramyxoviridae	TRUE	39.7854	0.29533	2	24
Paramyxoviridae_19	Paramyxoviridae	FALSE	63.1979	0.0721368	2	12
Paramyxoviridae_19	Paramyxoviridae	TRUE	57.3952	0.194196	2	12
Paramyxoviridae_23	Paramyxoviridae	TRUE	4999.45	0.0937605	2	25
Paramyxoviridae_3	Paramyxoviridae	FALSE	355.211	0.206031	17	112
Paramyxoviridae_3	Paramyxoviridae	TRUE	2137.28	0.10713	17	112
Paramyxoviridae_30	Paramyxoviridae	FALSE	12.0145	0.205495	7	48
Paramyxoviridae_30	Paramyxoviridae	TRUE	14.0297	0.119159	7	48
Paramyxoviridae_4	Paramyxoviridae	FALSE	31.3409	0.0607469	4	147
Paramyxoviridae_4	Paramyxoviridae	TRUE	72.384	0.111489	4	147
Paramyxoviridae_5	Paramyxoviridae	FALSE	1292.92	0.0506591	31	726
Paramyxoviridae_5	Paramyxoviridae	TRUE	607.227	0.0331289	31	726
Paramyxoviridae_61	Paramyxoviridae	FALSE	273.068	0.0948378	3	92
Paramyxoviridae_61	Paramyxoviridae	TRUE	198.916	0.139342	3	92
Paramyxoviridae_7	Paramyxoviridae	FALSE	26.3024	0.0314597	4	51
Paramyxoviridae_7	Paramyxoviridae	TRUE	22.634	0.0930553	4	51
Paramyxoviridae_8	Paramyxoviridae	FALSE	97.0119	0.122689	4	13
Paramyxoviridae_8	Paramyxoviridae	TRUE	554.79	0.0707133	4	13
Paramyxoviridae_9	Paramyxoviridae	FALSE	92.7714	0.0682252	6	92
Paramyxoviridae_9	Paramyxoviridae	TRUE	35.141	0.0612811	6	92
Parvoviridae_15	Parvoviridae	FALSE	175.593	0.0277736	4	87
Parvoviridae_15	Parvoviridae	TRUE	84.2611	0.0494602	4	87
Parvoviridae_16	Parvoviridae	FALSE	271.558	0.191468	2	21
Parvoviridae_16	Parvoviridae	TRUE	406.917	0.279059	2	21
Parvoviridae_18	Parvoviridae	FALSE	24.5104	0.0238871	7	96
Parvoviridae_18	Parvoviridae	TRUE	20.494	0.192507	7	96
Parvoviridae_19	Parvoviridae	FALSE	74.2139	0.128235	2	27
Parvoviridae_58	Parvoviridae	TRUE	31.935	0.0358959	3	10
Peribunyaviridae_16	Peribunyaviridae	FALSE	64.627	0.0444965	8	18
Peribunyaviridae_16	Peribunyaviridae	TRUE	142.193	0.0232354	8	18
Peribunyaviridae_22	Peribunyaviridae	FALSE	8.08873	0.056801	3	31
Peribunyaviridae_22	Peribunyaviridae	TRUE	8.07422	0.157064	3	31
Peribunyaviridae_37	Peribunyaviridae	FALSE	70.9244	0.00365244	6	73
Peribunyaviridae_37	Peribunyaviridae	TRUE	32.007	0.0152427	6	73
Picobirnaviridae_20	Picobirnaviridae	FALSE	337.772	0.141555	3	25
Picobirnaviridae_20	Picobirnaviridae	TRUE	379.959	0.172407	3	25
Picobirnaviridae_35	Picobirnaviridae	FALSE	104.282	0.068434	2	16
Picobirnaviridae_35	Picobirnaviridae	TRUE	49.6601	0.0613306	2	16
Picobirnaviridae_8	Picobirnaviridae	FALSE	278.792	0.113592	3	15
Picobirnaviridae_8	Picobirnaviridae	TRUE	287.829	0.162413	3	15
Picornaviridae_100	Picornaviridae	FALSE	80.3059	0.005781	4	187
Picornaviridae_100	Picornaviridae	TRUE	6.23081	0.320739	4	187
Picornaviridae_12	Picornaviridae	FALSE	1251.53	0.0563362	6	495
Picornaviridae_12	Picornaviridae	TRUE	184.102	0.0255995	6	495
Picornaviridae_14	Picornaviridae	FALSE	371.814	0.0174703	2	55
Picornaviridae_14	Picornaviridae	TRUE	84.5861	0.122646	2	55
Picornaviridae_142	Picornaviridae	FALSE	1083.59	0.0593768	2	65
Picornaviridae_142	Picornaviridae	TRUE	841.706	0.0428364	2	65
Picornaviridae_18	Picornaviridae	FALSE	35.8401	0.168472	6	16
Picornaviridae_18	Picornaviridae	TRUE	1551.48	0.031695	6	16
Picornaviridae_237	Picornaviridae	FALSE	1112.53	0.0153114	2	32
Picornaviridae_237	Picornaviridae	TRUE	1136.67	0.0148459	2	32
Picornaviridae_24	Picornaviridae	FALSE	1388.34	0.0136986	2	41
Picornaviridae_24	Picornaviridae	TRUE	70.4033	0.0568904	2	41
Picornaviridae_25	Picornaviridae	FALSE	286.997	0.0112565	2	169
Picornaviridae_25	Picornaviridae	TRUE	45.1317	0.0836133	2	169
Picornaviridae_30	Picornaviridae	FALSE	88.7261	0.0494779	2	11
Picornaviridae_30	Picornaviridae	TRUE	326.002	0.306636	2	11
Picornaviridae_44	Picornaviridae	FALSE	351.6	0.0305347	3	22
Picornaviridae_44	Picornaviridae	TRUE	359.063	0.0705283	3	22
Pneumoviridae_2	Pneumoviridae	FALSE	37.3194	0.0627692	3	65
Pneumoviridae_2	Pneumoviridae	TRUE	35.6228	0.0604058	3	65
Pneumoviridae_4	Pneumoviridae	FALSE	48.6696	0.00887496	1	1007
Pneumoviridae_4	Pneumoviridae	TRUE	28.8815	0.0464757	1	1007
Pneumoviridae_6	Pneumoviridae	FALSE	30.8375	0.0154052	1	876
Pneumoviridae_6	Pneumoviridae	TRUE	26.8797	0.0578649	1	876
Polyomaviridae_18	Polyomaviridae	FALSE	9.38015	0.977022	7	24
Polyomaviridae_18	Polyomaviridae	TRUE	12.5586	0.0483964	7	24
Polyomaviridae_26	Polyomaviridae	FALSE	6.07164	0.106165	3	35
Polyomaviridae_26	Polyomaviridae	TRUE	6.125	0.0679783	3	35
Poxviridae_12	Poxviridae	FALSE	123.387	0.293528	9	11
Poxviridae_2	Poxviridae	FALSE	18.7089	0.068844	20	428
Poxviridae_2	Poxviridae	TRUE	912.34	0.0925829	20	428
Poxviridae_3	Poxviridae	FALSE	7.09359	0.0688881	3	109
Poxviridae_3	Poxviridae	TRUE	101.32	0.478409	3	109
Poxviridae_7	Poxviridae	FALSE	26.485	0.0747205	3	65
Poxviridae_7	Poxviridae	TRUE	3823.61	0.159627	3	65
Poxviridae_8	Poxviridae	FALSE	231.663	0.143951	8	20
Poxviridae_8	Poxviridae	TRUE	115.494	0.276785	8	20
Rhabdoviridae_1	Rhabdoviridae	FALSE	69.968	0.0926892	25	136
Rhabdoviridae_1	Rhabdoviridae	TRUE	19.8511	0.0258127	25	136
Rhabdoviridae_10	Rhabdoviridae	FALSE	82.1737	0.0154024	26	798
Rhabdoviridae_10	Rhabdoviridae	TRUE	153.474	0.0121591	26	798
Rhabdoviridae_13	Rhabdoviridae	FALSE	67.3031	0.00698257	10	722
Rhabdoviridae_13	Rhabdoviridae	TRUE	57.673	0.00998252	10	722
Rhabdoviridae_22	Rhabdoviridae	FALSE	62.7997	0.0682185	3	32
Rhabdoviridae_22	Rhabdoviridae	TRUE	23.492	0.097243	3	32
Rhabdoviridae_3	Rhabdoviridae	FALSE	114.249	0.0248179	8	68
Rhabdoviridae_3	Rhabdoviridae	TRUE	25.7534	0.0212703	8	68
Rhabdoviridae_36	Rhabdoviridae	FALSE	126.351	0.0672586	2	17
Rhabdoviridae_36	Rhabdoviridae	TRUE	54.8385	0.0853336	2	17
Rhabdoviridae_5	Rhabdoviridae	FALSE	131.667	0.0258967	5	58
Rhabdoviridae_5	Rhabdoviridae	TRUE	45.7778	0.0319908	5	58
Rhabdoviridae_51	Rhabdoviridae	FALSE	8.02183	0.0685046	3	48
Rhabdoviridae_51	Rhabdoviridae	TRUE	5.0094	0.0757345	3	48
Rhabdoviridae_6	Rhabdoviridae	FALSE	251.168	0.0168725	2	30
Rhabdoviridae_6	Rhabdoviridae	TRUE	102.94	0.0380259	2	30
Rhabdoviridae_9	Rhabdoviridae	FALSE	81.2102	0.025139	21	106
Rhabdoviridae_9	Rhabdoviridae	TRUE	28.3987	0.0139559	21	106
Smacoviridae_19	Smacoviridae	FALSE	65.2404	0.116927	2	11
Smacoviridae_19	Smacoviridae	TRUE	361.516	0.218702	2	11
Togaviridae_1	Togaviridae	FALSE	30.4346	0.0237669	5	583
Togaviridae_1	Togaviridae	TRUE	6.30724	0.349211	5	583
Togaviridae_10	Togaviridae	TRUE	4.07966	0.537002	3	12
Togaviridae_13	Togaviridae	FALSE	32.6215	0.027732	7	49
Togaviridae_13	Togaviridae	TRUE	109.764	0.0610361	7	49
Togaviridae_14	Togaviridae	FALSE	208.254	0.0231456	6	55
Togaviridae_14	Togaviridae	TRUE	247.582	0.058075	6	55
Togaviridae_17	Togaviridae	FALSE	104.039	0.0269431	5	27
Togaviridae_17	Togaviridae	TRUE	9.82152	0.920389	5	27
Togaviridae_18	Togaviridae	FALSE	41.9574	0.0108582	40	452
Togaviridae_18	Togaviridae	TRUE	21.542	0.020712	40	452
Togaviridae_2	Togaviridae	FALSE	32.9894	0.0464987	8	69
Togaviridae_2	Togaviridae	TRUE	85.1015	0.0324783	8	69
Togaviridae_4	Togaviridae	FALSE	131.775	0.0412507	5	26
Togaviridae_4	Togaviridae	TRUE	23.4023	0.0163098	5	26
Togaviridae_7	Togaviridae	FALSE	18.5857	0.0299675	9	47
Togaviridae_7	Togaviridae	TRUE	48.5781	0.0335753	9	47
Togaviridae_8	Togaviridae	TRUE	130.169	0.159397	8	21
Togaviridae_9	Togaviridae	FALSE	5.05169	0.130505	10	171
Togaviridae_9	Togaviridae	TRUE	4.06505	0.129694	10	171

## Sheet: Supplementary Table 3d
Ancestral node name	Tip name	Gene length	Gene annotation	Ancestral host	Tip host	Viral clique	Viral family	Is host jump?	ln(dN/dS)	Num. of genomes in viral clique	Gene type
Node1004	OM966899.1	13125	ORF1a_polyprotein	Homo sapiens	Canis lupus familiaris	Coronaviridae_12	Coronaviridae	TRUE	0.00305756	1579	Replication-associated
Node1004	OM966899.1	21195	ORF1ab_polyprotein	Homo sapiens	Canis lupus familiaris	Coronaviridae_12	Coronaviridae	TRUE	0.188922	1579	Replication-associated
Node1004	OM966899.1	828	ORF3a_protein	Homo sapiens	Canis lupus familiaris	Coronaviridae_12	Coronaviridae	TRUE	-0.395644	1579	Auxiliary
Node1004	OM966899.1	3702	surface_glycoprotein	Homo sapiens	Canis lupus familiaris	Coronaviridae_12	Coronaviridae	TRUE	-0.0855958	1579	Entry
Node1004	OM966900.1	13125	ORF1a_polyprotein	Homo sapiens	Felis catus	Coronaviridae_12	Coronaviridae	TRUE	0.00305756	1579	Replication-associated
Node1004	OM966900.1	21195	ORF1ab_polyprotein	Homo sapiens	Felis catus	Coronaviridae_12	Coronaviridae	TRUE	0.188922	1579	Replication-associated
Node1004	OM966900.1	828	ORF3a_protein	Homo sapiens	Felis catus	Coronaviridae_12	Coronaviridae	TRUE	-0.395644	1579	Auxiliary
Node1004	OM966900.1	3702	surface_glycoprotein	Homo sapiens	Felis catus	Coronaviridae_12	Coronaviridae	TRUE	-0.0855958	1579	Entry
Node1007	MW600500.1	12906	ORF1a_polyprotein	Homo sapiens	Felis catus	Coronaviridae_12	Coronaviridae	TRUE	-0.16917	1579	Replication-associated
Node1007	MW600500.1	20976	ORF1ab_polyprotein	Homo sapiens	Felis catus	Coronaviridae_12	Coronaviridae	TRUE	-0.341626	1579	Replication-associated
Node1007	MW600500.1	3702	surface_glycoprotein	Homo sapiens	Felis catus	Coronaviridae_12	Coronaviridae	TRUE	-0.765815	1579	Entry
Node1019	OP006342.1	1179	nucleocapsid_phosphoprotein	Homo sapiens	Odocoileus virginianus	Coronaviridae_12	Coronaviridae	TRUE	-0.381462	1579	Structural
Node1019	OP006342.1	12990	ORF1a_polyprotein	Homo sapiens	Odocoileus virginianus	Coronaviridae_12	Coronaviridae	TRUE	-0.298656	1579	Replication-associated
Node1019	OP006342.1	20916	ORF1ab_polyprotein	Homo sapiens	Odocoileus virginianus	Coronaviridae_12	Coronaviridae	TRUE	-0.381204	1579	Replication-associated
Node1020	MZ363851.1	12888	ORF1a_polyprotein	Homo sapiens	Panthera leo	Coronaviridae_12	Coronaviridae	TRUE	0.407104	1579	Replication-associated
Node1020	MZ363851.1	20709	ORF1ab_polyprotein	Homo sapiens	Panthera leo	Coronaviridae_12	Coronaviridae	TRUE	0.189242	1579	Replication-associated
Node1020	MZ363852.1	12888	ORF1a_polyprotein	Homo sapiens	Panthera leo	Coronaviridae_12	Coronaviridae	TRUE	0.407104	1579	Replication-associated
Node1020	MZ363852.1	20709	ORF1ab_polyprotein	Homo sapiens	Panthera leo	Coronaviridae_12	Coronaviridae	TRUE	0.189242	1579	Replication-associated
Node1020	MZ363853.1	13125	ORF1a_polyprotein	Homo sapiens	Panthera leo	Coronaviridae_12	Coronaviridae	TRUE	0.406608	1579	Replication-associated
Node1020	MZ363853.1	20946	ORF1ab_polyprotein	Homo sapiens	Panthera leo	Coronaviridae_12	Coronaviridae	TRUE	0.188922	1579	Replication-associated
Node1020	MZ363854.1	13125	ORF1a_polyprotein	Homo sapiens	Panthera leo	Coronaviridae_12	Coronaviridae	TRUE	0.406608	1579	Replication-associated
Node1020	MZ363854.1	20946	ORF1ab_polyprotein	Homo sapiens	Panthera leo	Coronaviridae_12	Coronaviridae	TRUE	0.188922	1579	Replication-associated
Node1022	ON982610.1	13125	ORF1a_polyprotein	Homo sapiens	Felis catus	Coronaviridae_12	Coronaviridae	TRUE	-1.07578	1579	Replication-associated
Node1022	ON982610.1	21195	ORF1ab_polyprotein	Homo sapiens	Felis catus	Coronaviridae_12	Coronaviridae	TRUE	-0.950977	1579	Replication-associated
Node1022	ON982610.1	3708	surface_glycoprotein	Homo sapiens	Felis catus	Coronaviridae_12	Coronaviridae	TRUE	0.208347	1579	Entry
Node1022	ON982611.1	13125	ORF1a_polyprotein	Homo sapiens	Felis catus	Coronaviridae_12	Coronaviridae	TRUE	-1.07578	1579	Replication-associated
Node1022	ON982611.1	21195	ORF1ab_polyprotein	Homo sapiens	Felis catus	Coronaviridae_12	Coronaviridae	TRUE	-0.896079	1579	Replication-associated
Node1022	ON982611.1	3708	surface_glycoprotein	Homo sapiens	Felis catus	Coronaviridae_12	Coronaviridae	TRUE	0.0320743	1579	Entry
Node1035	OL677176.2	13119	ORF1a_polyprotein	Homo sapiens	Panthera leo	Coronaviridae_12	Coronaviridae	TRUE	-0.447542	1579	Replication-associated
Node1035	OL677176.2	21189	ORF1ab_polyprotein	Homo sapiens	Panthera leo	Coronaviridae_12	Coronaviridae	TRUE	-0.777724	1579	Replication-associated
Node1035	OL677176.2	3705	surface_glycoprotein	Homo sapiens	Panthera leo	Coronaviridae_12	Coronaviridae	TRUE	-0.0231424	1579	Entry
Node1035	OP393893.1	13125	ORF1a_polyprotein	Homo sapiens	Panthera leo	Coronaviridae_12	Coronaviridae	TRUE	-0.447556	1579	Replication-associated
Node1035	OP393893.1	21162	ORF1ab_polyprotein	Homo sapiens	Panthera leo	Coronaviridae_12	Coronaviridae	TRUE	-0.777851	1579	Replication-associated
Node1041	OM912904.1	13125	ORF1a_polyprotein	Homo sapiens	Odocoileus virginianus	Coronaviridae_12	Coronaviridae	TRUE	-0.748701	1579	Replication-associated
Node1041	OM912904.1	21195	ORF1ab_polyprotein	Homo sapiens	Odocoileus virginianus	Coronaviridae_12	Coronaviridae	TRUE	-0.747608	1579	Replication-associated
Node1041	OP006441.1	12720	ORF1a_polyprotein	Homo sapiens	Odocoileus virginianus	Coronaviridae_12	Coronaviridae	TRUE	0.605597	1579	Replication-associated
Node1041	OP006441.1	20655	ORF1ab_polyprotein	Homo sapiens	Odocoileus virginianus	Coronaviridae_12	Coronaviridae	TRUE	0.128785	1579	Replication-associated
Node1041	OQ437913.1	13125	ORF1a_polyprotein	Homo sapiens	Odocoileus virginianus	Coronaviridae_12	Coronaviridae	TRUE	-0.572456	1579	Replication-associated
Node1041	OQ437913.1	21195	ORF1ab_polyprotein	Homo sapiens	Odocoileus virginianus	Coronaviridae_12	Coronaviridae	TRUE	-0.814636	1579	Replication-associated
Node1041	OQ437913.1	3708	surface_glycoprotein	Homo sapiens	Odocoileus virginianus	Coronaviridae_12	Coronaviridae	TRUE	0.031652	1579	Entry
Node1041	OQ437915.1	12891	ORF1a_polyprotein	Homo sapiens	Odocoileus virginianus	Coronaviridae_12	Coronaviridae	TRUE	-0.91265	1579	Replication-associated
Node1041	OQ437915.1	20961	ORF1ab_polyprotein	Homo sapiens	Odocoileus virginianus	Coronaviridae_12	Coronaviridae	TRUE	-0.963639	1579	Replication-associated
Node1041	OQ437916.1	13125	ORF1a_polyprotein	Homo sapiens	Odocoileus virginianus	Coronaviridae_12	Coronaviridae	TRUE	-0.572456	1579	Replication-associated
Node1041	OQ437916.1	21195	ORF1ab_polyprotein	Homo sapiens	Odocoileus virginianus	Coronaviridae_12	Coronaviridae	TRUE	-0.814636	1579	Replication-associated
Node1041	OQ437916.1	3705	surface_glycoprotein	Homo sapiens	Odocoileus virginianus	Coronaviridae_12	Coronaviridae	TRUE	-0.269969	1579	Entry
Node1041	OQ437923.1	13104	ORF1a_polyprotein	Homo sapiens	Odocoileus virginianus	Coronaviridae_12	Coronaviridae	TRUE	-0.572555	1579	Replication-associated
Node1041	OQ437923.1	21174	ORF1ab_polyprotein	Homo sapiens	Odocoileus virginianus	Coronaviridae_12	Coronaviridae	TRUE	-0.814696	1579	Replication-associated
Node1041	OQ437923.1	3696	surface_glycoprotein	Homo sapiens	Odocoileus virginianus	Coronaviridae_12	Coronaviridae	TRUE	-0.269896	1579	Entry
Node1041	OQ437929.1	13125	ORF1a_polyprotein	Homo sapiens	Odocoileus virginianus	Coronaviridae_12	Coronaviridae	TRUE	-0.697721	1579	Replication-associated
Node1041	OQ437929.1	21195	ORF1ab_polyprotein	Homo sapiens	Odocoileus virginianus	Coronaviridae_12	Coronaviridae	TRUE	-0.651023	1579	Replication-associated
Node1041	OQ437946.1	13125	ORF1a_polyprotein	Homo sapiens	Odocoileus virginianus	Coronaviridae_12	Coronaviridae	TRUE	-0.396314	1579	Replication-associated
Node1041	OQ437946.1	21195	ORF1ab_polyprotein	Homo sapiens	Odocoileus virginianus	Coronaviridae_12	Coronaviridae	TRUE	-0.513543	1579	Replication-associated
Node1041	OQ437946.1	3705	surface_glycoprotein	Homo sapiens	Odocoileus virginianus	Coronaviridae_12	Coronaviridae	TRUE	0.031869	1579	Entry
Node1041	OQ437952.1	13125	ORF1a_polyprotein	Homo sapiens	Odocoileus virginianus	Coronaviridae_12	Coronaviridae	TRUE	-0.873536	1579	Replication-associated
Node1041	OQ437952.1	21195	ORF1ab_polyprotein	Homo sapiens	Odocoileus virginianus	Coronaviridae_12	Coronaviridae	TRUE	-0.969495	1579	Replication-associated
Node1041	OQ437963.1	1248	nucleocapsid_phosphoprotein	Homo sapiens	Odocoileus virginianus	Coronaviridae_12	Coronaviridae	TRUE	-0.381059	1579	Structural
Node1041	OQ437963.1	13125	ORF1a_polyprotein	Homo sapiens	Odocoileus virginianus	Coronaviridae_12	Coronaviridae	TRUE	-0.873536	1579	Replication-associated
Node1041	OQ437963.1	21195	ORF1ab_polyprotein	Homo sapiens	Odocoileus virginianus	Coronaviridae_12	Coronaviridae	TRUE	-0.571474	1579	Replication-associated
Node1041	OQ437963.1	3705	surface_glycoprotein	Homo sapiens	Odocoileus virginianus	Coronaviridae_12	Coronaviridae	TRUE	-0.128972	1579	Entry
Node1041	OQ437967.1	13125	ORF1a_polyprotein	Homo sapiens	Odocoileus virginianus	Coronaviridae_12	Coronaviridae	TRUE	-0.593889	1579	Replication-associated
Node1041	OQ437967.1	21195	ORF1ab_polyprotein	Homo sapiens	Odocoileus virginianus	Coronaviridae_12	Coronaviridae	TRUE	-0.369504	1579	Replication-associated
Node1041	OQ437979.1	12075	ORF1a_polyprotein	Homo sapiens	Odocoileus virginianus	Coronaviridae_12	Coronaviridae	TRUE	-0.859221	1579	Replication-associated
Node1041	OQ437979.1	20145	ORF1ab_polyprotein	Homo sapiens	Odocoileus virginianus	Coronaviridae_12	Coronaviridae	TRUE	-0.76105	1579	Replication-associated
Node1041	OQ437979.1	828	ORF3a_protein	Homo sapiens	Odocoileus virginianus	Coronaviridae_12	Coronaviridae	TRUE	-0.651436	1579	Auxiliary
Node1044	OP006328.1	20718	ORF1ab_polyprotein	Homo sapiens	Odocoileus virginianus	Coronaviridae_12	Coronaviridae	TRUE	-0.748404	1579	Replication-associated
Node1044	OP006329.1	20988	ORF1ab_polyprotein	Homo sapiens	Odocoileus virginianus	Coronaviridae_12	Coronaviridae	TRUE	-0.571222	1579	Replication-associated
Node1044	OP006336.1	1179	nucleocapsid_phosphoprotein	Homo sapiens	Odocoileus virginianus	Coronaviridae_12	Coronaviridae	TRUE	-0.381835	1579	Structural
Node1044	OP006374.1	1179	nucleocapsid_phosphoprotein	Homo sapiens	Odocoileus virginianus	Coronaviridae_12	Coronaviridae	TRUE	-0.382361	1579	Structural
Node1044	OP006374.1	13056	ORF1a_polyprotein	Homo sapiens	Odocoileus virginianus	Coronaviridae_12	Coronaviridae	TRUE	-0.873565	1579	Replication-associated
Node1044	OP006374.1	20991	ORF1ab_polyprotein	Homo sapiens	Odocoileus virginianus	Coronaviridae_12	Coronaviridae	TRUE	-0.571516	1579	Replication-associated
Node1044	OP006382.1	20931	ORF1ab_polyprotein	Homo sapiens	Odocoileus virginianus	Coronaviridae_12	Coronaviridae	TRUE	-0.872931	1579	Replication-associated
Node1044	OP006382.1	3624	surface_glycoprotein	Homo sapiens	Odocoileus virginianus	Coronaviridae_12	Coronaviridae	TRUE	-0.387866	1579	Entry
Node1044	OP006383.1	12282	ORF1a_polyprotein	Homo sapiens	Odocoileus virginianus	Coronaviridae_12	Coronaviridae	TRUE	-0.273101	1579	Replication-associated
Node1044	OP006383.1	19887	ORF1ab_polyprotein	Homo sapiens	Odocoileus virginianus	Coronaviridae_12	Coronaviridae	TRUE	-0.448277	1579	Replication-associated
Node1044	OP006385.1	20616	ORF1ab_polyprotein	Homo sapiens	Odocoileus virginianus	Coronaviridae_12	Coronaviridae	TRUE	-0.572433	1579	Replication-associated
Node1044	OP006397.1	12564	ORF1a_polyprotein	Homo sapiens	Odocoileus virginianus	Coronaviridae_12	Coronaviridae	TRUE	-0.573433	1579	Replication-associated
Node1044	OP006397.1	20499	ORF1ab_polyprotein	Homo sapiens	Odocoileus virginianus	Coronaviridae_12	Coronaviridae	TRUE	-0.748232	1579	Replication-associated
Node1044	OP006424.1	20985	ORF1ab_polyprotein	Homo sapiens	Odocoileus virginianus	Coronaviridae_12	Coronaviridae	TRUE	-0.969659	1579	Replication-associated
Node1044	OP006424.1	3594	surface_glycoprotein	Homo sapiens	Odocoileus virginianus	Coronaviridae_12	Coronaviridae	TRUE	-0.690243	1579	Entry
Node1044	OQ437917.1	13125	ORF1a_polyprotein	Homo sapiens	Odocoileus virginianus	Coronaviridae_12	Coronaviridae	TRUE	-0.394933	1579	Replication-associated
Node1044	OQ437917.1	21195	ORF1ab_polyprotein	Homo sapiens	Odocoileus virginianus	Coronaviridae_12	Coronaviridae	TRUE	-0.547336	1579	Replication-associated
Node1044	OQ437919.1	13125	ORF1a_polyprotein	Homo sapiens	Odocoileus virginianus	Coronaviridae_12	Coronaviridae	TRUE	-0.749102	1579	Replication-associated
Node1044	OQ437919.1	21195	ORF1ab_polyprotein	Homo sapiens	Odocoileus virginianus	Coronaviridae_12	Coronaviridae	TRUE	-0.718096	1579	Replication-associated
Node1044	OQ437924.1	1248	nucleocapsid_phosphoprotein	Homo sapiens	Odocoileus virginianus	Coronaviridae_12	Coronaviridae	TRUE	0.0313995	1579	Structural
Node1044	OQ437924.1	12126	ORF1a_polyprotein	Homo sapiens	Odocoileus virginianus	Coronaviridae_12	Coronaviridae	TRUE	-0.51546	1579	Replication-associated
Node1044	OQ437924.1	19989	ORF1ab_polyprotein	Homo sapiens	Odocoileus virginianus	Coronaviridae_12	Coronaviridae	TRUE	-0.44756	1579	Replication-associated
Node1044	OQ437924.1	3285	surface_glycoprotein	Homo sapiens	Odocoileus virginianus	Coronaviridae_12	Coronaviridae	TRUE	0.27866	1579	Entry
Node1044	OQ437925.1	1248	nucleocapsid_phosphoprotein	Homo sapiens	Odocoileus virginianus	Coronaviridae_12	Coronaviridae	TRUE	0.0306286	1579	Structural
Node1044	OQ437925.1	12792	ORF1a_polyprotein	Homo sapiens	Odocoileus virginianus	Coronaviridae_12	Coronaviridae	TRUE	-0.396391	1579	Replication-associated
Node1044	OQ437925.1	20862	ORF1ab_polyprotein	Homo sapiens	Odocoileus virginianus	Coronaviridae_12	Coronaviridae	TRUE	-0.408762	1579	Replication-associated
Node1044	OQ437925.1	3474	surface_glycoprotein	Homo sapiens	Odocoileus virginianus	Coronaviridae_12	Coronaviridae	TRUE	0.172153	1579	Entry
Node1044	OQ437931.1	1248	nucleocapsid_phosphoprotein	Homo sapiens	Odocoileus virginianus	Coronaviridae_12	Coronaviridae	TRUE	0.0313941	1579	Structural
Node1044	OQ437931.1	12834	ORF1a_polyprotein	Homo sapiens	Odocoileus virginianus	Coronaviridae_12	Coronaviridae	TRUE	-0.535077	1579	Replication-associated
Node1044	OQ437931.1	20904	ORF1ab_polyprotein	Homo sapiens	Odocoileus virginianus	Coronaviridae_12	Coronaviridae	TRUE	-0.462558	1579	Replication-associated
Node1044	OQ437931.1	3456	surface_glycoprotein	Homo sapiens	Odocoileus virginianus	Coronaviridae_12	Coronaviridae	TRUE	-0.30751	1579	Entry
Node1044	OQ437937.1	13125	ORF1a_polyprotein	Homo sapiens	Odocoileus virginianus	Coronaviridae_12	Coronaviridae	TRUE	-0.772608	1579	Replication-associated
Node1044	OQ437937.1	21195	ORF1ab_polyprotein	Homo sapiens	Odocoileus virginianus	Coronaviridae_12	Coronaviridae	TRUE	-0.695054	1579	Replication-associated
Node1044	OQ437964.1	1248	nucleocapsid_phosphoprotein	Homo sapiens	Odocoileus virginianus	Coronaviridae_12	Coronaviridae	TRUE	-0.270168	1579	Structural
Node1044	OQ437964.1	12891	ORF1a_polyprotein	Homo sapiens	Odocoileus virginianus	Coronaviridae_12	Coronaviridae	TRUE	-0.493353	1579	Replication-associated
Node1044	OQ437964.1	20817	ORF1ab_polyprotein	Homo sapiens	Odocoileus virginianus	Coronaviridae_12	Coronaviridae	TRUE	-0.395539	1579	Replication-associated
Node1044	OQ437964.1	3654	surface_glycoprotein	Homo sapiens	Odocoileus virginianus	Coronaviridae_12	Coronaviridae	TRUE	-0.0229431	1579	Entry
Node1044	OQ437972.1	1248	nucleocapsid_phosphoprotein	Homo sapiens	Odocoileus virginianus	Coronaviridae_12	Coronaviridae	TRUE	-0.269854	1579	Structural
Node1044	OQ437972.1	13125	ORF1a_polyprotein	Homo sapiens	Odocoileus virginianus	Coronaviridae_12	Coronaviridae	TRUE	-0.396024	1579	Replication-associated
Node1044	OQ437972.1	21192	ORF1ab_polyprotein	Homo sapiens	Odocoileus virginianus	Coronaviridae_12	Coronaviridae	TRUE	-0.460049	1579	Replication-associated
Node1044	OQ437973.1	1248	nucleocapsid_phosphoprotein	Homo sapiens	Odocoileus virginianus	Coronaviridae_12	Coronaviridae	TRUE	0.0313995	1579	Structural
Node1044	OQ437973.1	12663	ORF1a_polyprotein	Homo sapiens	Odocoileus virginianus	Coronaviridae_12	Coronaviridae	TRUE	-0.475477	1579	Replication-associated
Node1044	OQ437973.1	20589	ORF1ab_polyprotein	Homo sapiens	Odocoileus virginianus	Coronaviridae_12	Coronaviridae	TRUE	-0.466756	1579	Replication-associated
Node1044	OQ437973.1	3474	surface_glycoprotein	Homo sapiens	Odocoileus virginianus	Coronaviridae_12	Coronaviridae	TRUE	0.172153	1579	Entry
Node1044	OQ437974.1	13125	ORF1a_polyprotein	Homo sapiens	Odocoileus virginianus	Coronaviridae_12	Coronaviridae	TRUE	-1.06473	1579	Replication-associated
Node1044	OQ437974.1	21174	ORF1ab_polyprotein	Homo sapiens	Odocoileus virginianus	Coronaviridae_12	Coronaviridae	TRUE	-0.711689	1579	Replication-associated
Node1065	OP006334.1	12996	ORF1a_polyprotein	Homo sapiens	Odocoileus virginianus	Coronaviridae_12	Coronaviridae	TRUE	-0.874167	1579	Replication-associated
Node1065	OP006334.1	20931	ORF1ab_polyprotein	Homo sapiens	Odocoileus virginianus	Coronaviridae_12	Coronaviridae	TRUE	-0.395763	1579	Replication-associated
Node1065	OP006365.1	20928	ORF1ab_polyprotein	Homo sapiens	Odocoileus virginianus	Coronaviridae_12	Coronaviridae	TRUE	-0.270722	1579	Replication-associated
Node1065	OP006398.1	1179	nucleocapsid_phosphoprotein	Homo sapiens	Odocoileus virginianus	Coronaviridae_12	Coronaviridae	TRUE	-0.877609	1579	Structural
Node1065	OP006398.1	12993	ORF1a_polyprotein	Homo sapiens	Odocoileus virginianus	Coronaviridae_12	Coronaviridae	TRUE	-0.572896	1579	Replication-associated
Node1065	OP006398.1	20928	ORF1ab_polyprotein	Homo sapiens	Odocoileus virginianus	Coronaviridae_12	Coronaviridae	TRUE	-0.969943	1579	Replication-associated
Node1065	OP006439.1	1248	nucleocapsid_phosphoprotein	Homo sapiens	Odocoileus virginianus	Coronaviridae_12	Coronaviridae	TRUE	-0.572756	1579	Structural
Node1065	OP006439.1	20268	ORF1ab_polyprotein	Homo sapiens	Odocoileus virginianus	Coronaviridae_12	Coronaviridae	TRUE	-0.0948239	1579	Replication-associated
Node1065	OP006439.1	3222	surface_glycoprotein	Homo sapiens	Odocoileus virginianus	Coronaviridae_12	Coronaviridae	TRUE	-0.269362	1579	Entry
Node1065	OP006446.1	12753	ORF1a_polyprotein	Homo sapiens	Odocoileus virginianus	Coronaviridae_12	Coronaviridae	TRUE	-1.29303	1579	Replication-associated
Node1065	OP006446.1	20688	ORF1ab_polyprotein	Homo sapiens	Odocoileus virginianus	Coronaviridae_12	Coronaviridae	TRUE	-0.830624	1579	Replication-associated
Node1065	OP006446.1	165	ORF7a_protein	Homo sapiens	Odocoileus virginianus	Coronaviridae_12	Coronaviridae	TRUE	-0.40772	1579	Auxiliary
Node1065	OP006446.1	3492	surface_glycoprotein	Homo sapiens	Odocoileus virginianus	Coronaviridae_12	Coronaviridae	TRUE	-0.690999	1579	Entry
Node1065	OQ437944.1	12903	ORF1a_polyprotein	Homo sapiens	Odocoileus virginianus	Coronaviridae_12	Coronaviridae	TRUE	-0.599999	1579	Replication-associated
Node1065	OQ437944.1	20973	ORF1ab_polyprotein	Homo sapiens	Odocoileus virginianus	Coronaviridae_12	Coronaviridae	TRUE	-0.432165	1579	Replication-associated
Node1065	OQ437944.1	828	ORF3a_protein	Homo sapiens	Odocoileus virginianus	Coronaviridae_12	Coronaviridae	TRUE	-0.279484	1579	Auxiliary
Node1065	OQ437953.1	12594	ORF1a_polyprotein	Homo sapiens	Odocoileus virginianus	Coronaviridae_12	Coronaviridae	TRUE	-0.47426	1579	Replication-associated
Node1065	OQ437953.1	20463	ORF1ab_polyprotein	Homo sapiens	Odocoileus virginianus	Coronaviridae_12	Coronaviridae	TRUE	-0.317917	1579	Replication-associated
Node1087	OM912903.1	20661	ORF1ab_polyprotein	Homo sapiens	Odocoileus virginianus	Coronaviridae_12	Coronaviridae	TRUE	0.428629	1579	Replication-associated
Node1087	OP006309.1	13008	ORF1a_polyprotein	Homo sapiens	Odocoileus virginianus	Coronaviridae_12	Coronaviridae	TRUE	-0.0876787	1579	Replication-associated
Node1087	OP006309.1	20940	ORF1ab_polyprotein	Homo sapiens	Odocoileus virginianus	Coronaviridae_12	Coronaviridae	TRUE	0.13082	1579	Replication-associated
Node1087	OP006357.1	12981	ORF1a_polyprotein	Homo sapiens	Odocoileus virginianus	Coronaviridae_12	Coronaviridae	TRUE	-0.0874662	1579	Replication-associated
Node1087	OP006357.1	20649	ORF1ab_polyprotein	Homo sapiens	Odocoileus virginianus	Coronaviridae_12	Coronaviridae	TRUE	0.130626	1579	Replication-associated
Node1090	OM570187.1	13125	ORF1a_polyprotein	Homo sapiens	Odocoileus virginianus	Coronaviridae_12	Coronaviridae	TRUE	-0.970533	1579	Replication-associated
Node1090	OM570187.1	21195	ORF1ab_polyprotein	Homo sapiens	Odocoileus virginianus	Coronaviridae_12	Coronaviridae	TRUE	-0.803181	1579	Replication-associated
Node1090	OM570187.1	3705	surface_glycoprotein	Homo sapiens	Odocoileus virginianus	Coronaviridae_12	Coronaviridae	TRUE	-0.269111	1579	Entry
Node1090	OM570190.1	21195	ORF1ab_polyprotein	Homo sapiens	Odocoileus virginianus	Coronaviridae_12	Coronaviridae	TRUE	-1.16791	1579	Replication-associated
Node1090	OM570190.1	366	ORF7a_protein	Homo sapiens	Odocoileus virginianus	Coronaviridae_12	Coronaviridae	TRUE	-0.380687	1579	Auxiliary
Node1090	OM570190.1	3705	surface_glycoprotein	Homo sapiens	Odocoileus virginianus	Coronaviridae_12	Coronaviridae	TRUE	0.172173	1579	Entry
Node1090	OP006375.1	20985	ORF1ab_polyprotein	Homo sapiens	Odocoileus virginianus	Coronaviridae_12	Coronaviridae	TRUE	-0.991846	1579	Replication-associated
Node1090	OP006375.1	3594	surface_glycoprotein	Homo sapiens	Odocoileus virginianus	Coronaviridae_12	Coronaviridae	TRUE	-0.270263	1579	Entry
Node1093	OP006302.1	12993	ORF1a_polyprotein	Homo sapiens	Odocoileus virginianus	Coronaviridae_12	Coronaviridae	TRUE	-0.493896	1579	Replication-associated
Node1093	OP006302.1	20928	ORF1ab_polyprotein	Homo sapiens	Odocoileus virginianus	Coronaviridae_12	Coronaviridae	TRUE	-0.51398	1579	Replication-associated
Node1093	OP006302.1	3594	surface_glycoprotein	Homo sapiens	Odocoileus virginianus	Coronaviridae_12	Coronaviridae	TRUE	-0.748574	1579	Entry
Node1093	OP006307.1	1179	nucleocapsid_phosphoprotein	Homo sapiens	Odocoileus virginianus	Coronaviridae_12	Coronaviridae	TRUE	-0.682821	1579	Structural
Node1093	OP006307.1	12996	ORF1a_polyprotein	Homo sapiens	Odocoileus virginianus	Coronaviridae_12	Coronaviridae	TRUE	0.673652	1579	Replication-associated
Node1093	OP006307.1	20931	ORF1ab_polyprotein	Homo sapiens	Odocoileus virginianus	Coronaviridae_12	Coronaviridae	TRUE	0.392122	1579	Replication-associated
Node1093	OP006317.1	639	membrane_glycoprotein	Homo sapiens	Odocoileus virginianus	Coronaviridae_12	Coronaviridae	TRUE	-0.565715	1579	Structural
Node1093	OP006317.1	12996	ORF1a_polyprotein	Homo sapiens	Odocoileus virginianus	Coronaviridae_12	Coronaviridae	TRUE	-0.272228	1579	Replication-associated
Node1093	OP006317.1	20925	ORF1ab_polyprotein	Homo sapiens	Odocoileus virginianus	Coronaviridae_12	Coronaviridae	TRUE	-0.16197	1579	Replication-associated
Node1093	OP006358.1	12714	ORF1a_polyprotein	Homo sapiens	Odocoileus virginianus	Coronaviridae_12	Coronaviridae	TRUE	-0.395377	1579	Replication-associated
Node1093	OP006358.1	20142	ORF1ab_polyprotein	Homo sapiens	Odocoileus virginianus	Coronaviridae_12	Coronaviridae	TRUE	-0.548167	1579	Replication-associated
Node1093	OP006367.1	12504	ORF1a_polyprotein	Homo sapiens	Odocoileus virginianus	Coronaviridae_12	Coronaviridae	TRUE	0.063563	1579	Replication-associated
Node1093	OP006367.1	20067	ORF1ab_polyprotein	Homo sapiens	Odocoileus virginianus	Coronaviridae_12	Coronaviridae	TRUE	-0.140736	1579	Replication-associated
Node1093	OP006367.1	3549	surface_glycoprotein	Homo sapiens	Odocoileus virginianus	Coronaviridae_12	Coronaviridae	TRUE	-0.572052	1579	Entry
Node1093	OP006396.1	12999	ORF1a_polyprotein	Homo sapiens	Odocoileus virginianus	Coronaviridae_12	Coronaviridae	TRUE	-0.21816	1579	Replication-associated
Node1093	OP006396.1	20934	ORF1ab_polyprotein	Homo sapiens	Odocoileus virginianus	Coronaviridae_12	Coronaviridae	TRUE	-0.217716	1579	Replication-associated
Node1093	OP006417.1	1248	nucleocapsid_phosphoprotein	Homo sapiens	Odocoileus virginianus	Coronaviridae_12	Coronaviridae	TRUE	-0.748323	1579	Structural
Node1093	OP006417.1	11406	ORF1a_polyprotein	Homo sapiens	Odocoileus virginianus	Coronaviridae_12	Coronaviridae	TRUE	0.0602363	1579	Replication-associated
Node1093	OP006417.1	18699	ORF1ab_polyprotein	Homo sapiens	Odocoileus virginianus	Coronaviridae_12	Coronaviridae	TRUE	0.000330707	1579	Replication-associated
Node1093	OP006417.1	2889	surface_glycoprotein	Homo sapiens	Odocoileus virginianus	Coronaviridae_12	Coronaviridae	TRUE	-0.876052	1579	Entry
Node1093	OP006428.1	1179	nucleocapsid_phosphoprotein	Homo sapiens	Odocoileus virginianus	Coronaviridae_12	Coronaviridae	TRUE	-0.321935	1579	Structural
Node1093	OP006428.1	12825	ORF1a_polyprotein	Homo sapiens	Odocoileus virginianus	Coronaviridae_12	Coronaviridae	TRUE	0.150441	1579	Replication-associated
Node1093	OP006428.1	20538	ORF1ab_polyprotein	Homo sapiens	Odocoileus virginianus	Coronaviridae_12	Coronaviridae	TRUE	0.28973	1579	Replication-associated
Node1093	OP006431.1	1179	nucleocapsid_phosphoprotein	Homo sapiens	Odocoileus virginianus	Coronaviridae_12	Coronaviridae	TRUE	-0.682821	1579	Structural
Node1093	OP006431.1	12771	ORF1a_polyprotein	Homo sapiens	Odocoileus virginianus	Coronaviridae_12	Coronaviridae	TRUE	-0.0260927	1579	Replication-associated
Node1093	OP006431.1	20130	ORF1ab_polyprotein	Homo sapiens	Odocoileus virginianus	Coronaviridae_12	Coronaviridae	TRUE	-0.00644146	1579	Replication-associated
Node1093	OP006434.1	12792	ORF1a_polyprotein	Homo sapiens	Odocoileus virginianus	Coronaviridae_12	Coronaviridae	TRUE	-0.494793	1579	Replication-associated
Node1093	OP006434.1	20220	ORF1ab_polyprotein	Homo sapiens	Odocoileus virginianus	Coronaviridae_12	Coronaviridae	TRUE	-0.514952	1579	Replication-associated
Node1093	OP006434.1	3162	surface_glycoprotein	Homo sapiens	Odocoileus virginianus	Coronaviridae_12	Coronaviridae	TRUE	-0.749453	1579	Entry
Node1093	OP006447.1	12996	ORF1a_polyprotein	Homo sapiens	Odocoileus virginianus	Coronaviridae_12	Coronaviridae	TRUE	0.558576	1579	Replication-associated
Node1093	OP006447.1	20931	ORF1ab_polyprotein	Homo sapiens	Odocoileus virginianus	Coronaviridae_12	Coronaviridae	TRUE	0.605649	1579	Replication-associated
Node1093	OP006447.1	3594	surface_glycoprotein	Homo sapiens	Odocoileus virginianus	Coronaviridae_12	Coronaviridae	TRUE	-0.803771	1579	Entry
Node1093	OQ437930.1	1248	nucleocapsid_phosphoprotein	Homo sapiens	Odocoileus virginianus	Coronaviridae_12	Coronaviridae	TRUE	-0.748323	1579	Structural
Node1093	OQ437930.1	13125	ORF1a_polyprotein	Homo sapiens	Odocoileus virginianus	Coronaviridae_12	Coronaviridae	TRUE	-0.432164	1579	Replication-associated
Node1093	OQ437930.1	21084	ORF1ab_polyprotein	Homo sapiens	Odocoileus virginianus	Coronaviridae_12	Coronaviridae	TRUE	-0.464479	1579	Replication-associated
Node1093	OQ437930.1	3534	surface_glycoprotein	Homo sapiens	Odocoileus virginianus	Coronaviridae_12	Coronaviridae	TRUE	-0.569169	1579	Entry
Node1093	OQ437932.1	1248	nucleocapsid_phosphoprotein	Homo sapiens	Odocoileus virginianus	Coronaviridae_12	Coronaviridae	TRUE	-0.380846	1579	Structural
Node1093	OQ437932.1	21195	ORF1ab_polyprotein	Homo sapiens	Odocoileus virginianus	Coronaviridae_12	Coronaviridae	TRUE	-0.895344	1579	Replication-associated
Node1093	OQ437941.1	13125	ORF1a_polyprotein	Homo sapiens	Odocoileus virginianus	Coronaviridae_12	Coronaviridae	TRUE	-0.739434	1579	Replication-associated
Node1093	OQ437941.1	21195	ORF1ab_polyprotein	Homo sapiens	Odocoileus virginianus	Coronaviridae_12	Coronaviridae	TRUE	-0.601696	1579	Replication-associated
Node1093	OQ437969.1	13059	ORF1a_polyprotein	Homo sapiens	Odocoileus virginianus	Coronaviridae_12	Coronaviridae	TRUE	-0.598247	1579	Replication-associated
Node1093	OQ437969.1	21129	ORF1ab_polyprotein	Homo sapiens	Odocoileus virginianus	Coronaviridae_12	Coronaviridae	TRUE	-0.484456	1579	Replication-associated
Node1093	OQ437969.1	3705	surface_glycoprotein	Homo sapiens	Odocoileus virginianus	Coronaviridae_12	Coronaviridae	TRUE	-0.872095	1579	Entry
Node1093	OQ437970.1	1248	nucleocapsid_phosphoprotein	Homo sapiens	Odocoileus virginianus	Coronaviridae_12	Coronaviridae	TRUE	-0.748641	1579	Structural
Node1093	OQ437970.1	13122	ORF1a_polyprotein	Homo sapiens	Odocoileus virginianus	Coronaviridae_12	Coronaviridae	TRUE	0.290718	1579	Replication-associated
Node1093	OQ437970.1	21066	ORF1ab_polyprotein	Homo sapiens	Odocoileus virginianus	Coronaviridae_12	Coronaviridae	TRUE	-0.206008	1579	Replication-associated
Node1093	OQ437970.1	828	ORF3a_protein	Homo sapiens	Odocoileus virginianus	Coronaviridae_12	Coronaviridae	TRUE	-0.2804	1579	Auxiliary
Node1093	OQ437970.1	3651	surface_glycoprotein	Homo sapiens	Odocoileus virginianus	Coronaviridae_12	Coronaviridae	TRUE	-0.572526	1579	Entry
Node1093	OQ437975.1	1248	nucleocapsid_phosphoprotein	Homo sapiens	Odocoileus virginianus	Coronaviridae_12	Coronaviridae	TRUE	-0.268707	1579	Structural
Node1093	OQ437975.1	12519	ORF1a_polyprotein	Homo sapiens	Odocoileus virginianus	Coronaviridae_12	Coronaviridae	TRUE	-0.367742	1579	Replication-associated
Node1093	OQ437975.1	20589	ORF1ab_polyprotein	Homo sapiens	Odocoileus virginianus	Coronaviridae_12	Coronaviridae	TRUE	-0.39503	1579	Replication-associated
Node1093	OQ437975.1	3705	surface_glycoprotein	Homo sapiens	Odocoileus virginianus	Coronaviridae_12	Coronaviridae	TRUE	-0.38775	1579	Entry
Node1093	OQ437983.1	13125	ORF1a_polyprotein	Homo sapiens	Odocoileus virginianus	Coronaviridae_12	Coronaviridae	TRUE	-0.0938198	1579	Replication-associated
Node1093	OQ437983.1	20994	ORF1ab_polyprotein	Homo sapiens	Odocoileus virginianus	Coronaviridae_12	Coronaviridae	TRUE	-0.438387	1579	Replication-associated
Node1093	OQ437983.1	3705	surface_glycoprotein	Homo sapiens	Odocoileus virginianus	Coronaviridae_12	Coronaviridae	TRUE	-0.747386	1579	Entry
Node1093	OQ437989.1	1248	nucleocapsid_phosphoprotein	Homo sapiens	Odocoileus virginianus	Coronaviridae_12	Coronaviridae	TRUE	-0.268707	1579	Structural
Node1093	OQ437989.1	12903	ORF1a_polyprotein	Homo sapiens	Odocoileus virginianus	Coronaviridae_12	Coronaviridae	TRUE	-0.572153	1579	Replication-associated
Node1093	OQ437989.1	20973	ORF1ab_polyprotein	Homo sapiens	Odocoileus virginianus	Coronaviridae_12	Coronaviridae	TRUE	-0.571319	1579	Replication-associated
Node1095	OQ421224.1	13125	ORF1a_polyprotein	Odocoileus virginianus	Homo sapiens	Coronaviridae_12	Coronaviridae	TRUE	0.131356	1579	Replication-associated
Node1095	OQ421224.1	21195	ORF1ab_polyprotein	Odocoileus virginianus	Homo sapiens	Coronaviridae_12	Coronaviridae	TRUE	-0.0922325	1579	Replication-associated
Node1119	OP006291.1	1248	nucleocapsid_phosphoprotein	Homo sapiens	Odocoileus virginianus	Coronaviridae_12	Coronaviridae	TRUE	-0.682223	1579	Structural
Node1119	OP006291.1	11475	ORF1a_polyprotein	Homo sapiens	Odocoileus virginianus	Coronaviridae_12	Coronaviridae	TRUE	-0.674308	1579	Replication-associated
Node1119	OP006291.1	18804	ORF1ab_polyprotein	Homo sapiens	Odocoileus virginianus	Coronaviridae_12	Coronaviridae	TRUE	-0.836936	1579	Replication-associated
Node1119	OP006291.1	3276	surface_glycoprotein	Homo sapiens	Odocoileus virginianus	Coronaviridae_12	Coronaviridae	TRUE	-0.0539827	1579	Entry
Node1119	OP006395.1	12522	ORF1a_polyprotein	Homo sapiens	Odocoileus virginianus	Coronaviridae_12	Coronaviridae	TRUE	-0.826055	1579	Replication-associated
Node1119	OP006395.1	20289	ORF1ab_polyprotein	Homo sapiens	Odocoileus virginianus	Coronaviridae_12	Coronaviridae	TRUE	-0.949303	1579	Replication-associated
Node1119	OP006395.1	3549	surface_glycoprotein	Homo sapiens	Odocoileus virginianus	Coronaviridae_12	Coronaviridae	TRUE	-0.356473	1579	Entry
Node1119	OP006399.1	12996	ORF1a_polyprotein	Homo sapiens	Odocoileus virginianus	Coronaviridae_12	Coronaviridae	TRUE	-0.840458	1579	Replication-associated
Node1119	OP006399.1	20928	ORF1ab_polyprotein	Homo sapiens	Odocoileus virginianus	Coronaviridae_12	Coronaviridae	TRUE	-0.961848	1579	Replication-associated
Node1119	OP006399.1	3594	surface_glycoprotein	Homo sapiens	Odocoileus virginianus	Coronaviridae_12	Coronaviridae	TRUE	-0.0555825	1579	Entry
Node1119	OP006408.1	12546	ORF1a_polyprotein	Homo sapiens	Odocoileus virginianus	Coronaviridae_12	Coronaviridae	TRUE	-0.499203	1579	Replication-associated
Node1119	OP006408.1	20556	ORF1ab_polyprotein	Homo sapiens	Odocoileus virginianus	Coronaviridae_12	Coronaviridae	TRUE	-0.637312	1579	Replication-associated
Node1119	OQ437951.1	12285	ORF1a_polyprotein	Homo sapiens	Odocoileus virginianus	Coronaviridae_12	Coronaviridae	TRUE	-0.449675	1579	Replication-associated
Node1119	OQ437951.1	20355	ORF1ab_polyprotein	Homo sapiens	Odocoileus virginianus	Coronaviridae_12	Coronaviridae	TRUE	-0.572959	1579	Replication-associated
Node1134	OK539641.1	13125	ORF1a_polyprotein	Homo sapiens	Canis lupus familiaris	Coronaviridae_12	Coronaviridae	TRUE	-0.271251	1579	Replication-associated
Node1134	OK539641.1	21195	ORF1ab_polyprotein	Homo sapiens	Canis lupus familiaris	Coronaviridae_12	Coronaviridae	TRUE	0.0307738	1579	Replication-associated
Node1138	ON564657.1	17046	ORF1ab_polyprotein	Homo sapiens	Capra hircus	Coronaviridae_12	Coronaviridae	TRUE	-0.271521	1579	Replication-associated
Node1138	ON564660.1	10776	ORF1a_polyprotein	Homo sapiens	Capra hircus	Coronaviridae_12	Coronaviridae	TRUE	-0.089052	1579	Replication-associated
Node1138	ON564660.1	10776	ORF1ab_polyprotein	Homo sapiens	Capra hircus	Coronaviridae_12	Coronaviridae	TRUE	-0.089052	1579	Replication-associated
Node1142	OQ437920.1	13125	ORF1a_polyprotein	Homo sapiens	Odocoileus virginianus	Coronaviridae_12	Coronaviridae	TRUE	-0.49833	1579	Replication-associated
Node1142	OQ437920.1	21195	ORF1ab_polyprotein	Homo sapiens	Odocoileus virginianus	Coronaviridae_12	Coronaviridae	TRUE	-0.615824	1579	Replication-associated
Node1142	OQ437947.1	13125	ORF1a_polyprotein	Homo sapiens	Odocoileus virginianus	Coronaviridae_12	Coronaviridae	TRUE	0.0296839	1579	Replication-associated
Node1142	OQ437947.1	21195	ORF1ab_polyprotein	Homo sapiens	Odocoileus virginianus	Coronaviridae_12	Coronaviridae	TRUE	-0.446518	1579	Replication-associated
Node1142	OQ437947.1	828	ORF3a_protein	Homo sapiens	Odocoileus virginianus	Coronaviridae_12	Coronaviridae	TRUE	-0.395159	1579	Auxiliary
Node1142	OQ437949.1	11730	ORF1a_polyprotein	Homo sapiens	Odocoileus virginianus	Coronaviridae_12	Coronaviridae	TRUE	0.0265845	1579	Replication-associated
Node1142	OQ437949.1	19800	ORF1ab_polyprotein	Homo sapiens	Odocoileus virginianus	Coronaviridae_12	Coronaviridae	TRUE	0.0289141	1579	Replication-associated
Node1142	OQ437956.1	669	membrane_glycoprotein	Homo sapiens	Odocoileus virginianus	Coronaviridae_12	Coronaviridae	TRUE	-0.379424	1579	Structural
Node1142	OQ437956.1	13125	ORF1a_polyprotein	Homo sapiens	Odocoileus virginianus	Coronaviridae_12	Coronaviridae	TRUE	-0.271377	1579	Replication-associated
Node1142	OQ437956.1	21195	ORF1ab_polyprotein	Homo sapiens	Odocoileus virginianus	Coronaviridae_12	Coronaviridae	TRUE	-0.130483	1579	Replication-associated
Node1142	OQ437977.1	13125	ORF1a_polyprotein	Homo sapiens	Odocoileus virginianus	Coronaviridae_12	Coronaviridae	TRUE	-0.396496	1579	Replication-associated
Node1142	OQ437977.1	21195	ORF1ab_polyprotein	Homo sapiens	Odocoileus virginianus	Coronaviridae_12	Coronaviridae	TRUE	-0.492412	1579	Replication-associated
Node1142	OQ437980.1	13125	ORF1a_polyprotein	Homo sapiens	Odocoileus virginianus	Coronaviridae_12	Coronaviridae	TRUE	-0.307315	1579	Replication-associated
Node1142	OQ437980.1	21195	ORF1ab_polyprotein	Homo sapiens	Odocoileus virginianus	Coronaviridae_12	Coronaviridae	TRUE	-0.297482	1579	Replication-associated
Node1142	OQ437980.1	3705	surface_glycoprotein	Homo sapiens	Odocoileus virginianus	Coronaviridae_12	Coronaviridae	TRUE	-0.269111	1579	Entry
Node1142	OQ437984.1	13125	ORF1a_polyprotein	Homo sapiens	Odocoileus virginianus	Coronaviridae_12	Coronaviridae	TRUE	0.0296228	1579	Replication-associated
Node1142	OQ437984.1	21195	ORF1ab_polyprotein	Homo sapiens	Odocoileus virginianus	Coronaviridae_12	Coronaviridae	TRUE	-0.270368	1579	Replication-associated
Node1144	OQ437933.1	12822	ORF1a_polyprotein	Homo sapiens	Odocoileus virginianus	Coronaviridae_12	Coronaviridae	TRUE	-0.471484	1579	Replication-associated
Node1144	OQ437933.1	20892	ORF1ab_polyprotein	Homo sapiens	Odocoileus virginianus	Coronaviridae_12	Coronaviridae	TRUE	-0.647662	1579	Replication-associated
Node1144	OQ437936.1	13125	ORF1a_polyprotein	Homo sapiens	Odocoileus virginianus	Coronaviridae_12	Coronaviridae	TRUE	-0.346028	1579	Replication-associated
Node1144	OQ437936.1	21195	ORF1ab_polyprotein	Homo sapiens	Odocoileus virginianus	Coronaviridae_12	Coronaviridae	TRUE	-0.471158	1579	Replication-associated
Node1144	OQ437968.1	13050	ORF1a_polyprotein	Homo sapiens	Odocoileus virginianus	Coronaviridae_12	Coronaviridae	TRUE	-0.471079	1579	Replication-associated
Node1144	OQ437968.1	21120	ORF1ab_polyprotein	Homo sapiens	Odocoileus virginianus	Coronaviridae_12	Coronaviridae	TRUE	-0.502253	1579	Replication-associated
Node1146	OQ437987.1	13125	ORF1a_polyprotein	Homo sapiens	Odocoileus virginianus	Coronaviridae_12	Coronaviridae	TRUE	-0.169713	1579	Replication-associated
Node1146	OQ437987.1	21192	ORF1ab_polyprotein	Homo sapiens	Odocoileus virginianus	Coronaviridae_12	Coronaviridae	TRUE	-0.130492	1579	Replication-associated
Node1155	OK174325.1	21195	ORF1ab_polyprotein	Homo sapiens	Canis lupus familiaris	Coronaviridae_12	Coronaviridae	TRUE	-0.690653	1579	Replication-associated
Node1155	OK174326.1	21195	ORF1ab_polyprotein	Homo sapiens	Canis lupus familiaris	Coronaviridae_12	Coronaviridae	TRUE	-0.690653	1579	Replication-associated
Node1159	OP006400.1	12996	ORF1a_polyprotein	Homo sapiens	Odocoileus virginianus	Coronaviridae_12	Coronaviridae	TRUE	-0.689944	1579	Replication-associated
Node1159	OP006400.1	20931	ORF1ab_polyprotein	Homo sapiens	Odocoileus virginianus	Coronaviridae_12	Coronaviridae	TRUE	-0.471621	1579	Replication-associated
Node1160	OQ437912.1	17553	ORF1ab_polyprotein	Homo sapiens	Odocoileus virginianus	Coronaviridae_12	Coronaviridae	TRUE	0.204346	1579	Replication-associated
Node1160	OQ437922.1	12726	ORF1a_polyprotein	Homo sapiens	Odocoileus virginianus	Coronaviridae_12	Coronaviridae	TRUE	-0.697652	1579	Replication-associated
Node1160	OQ437922.1	20796	ORF1ab_polyprotein	Homo sapiens	Odocoileus virginianus	Coronaviridae_12	Coronaviridae	TRUE	-0.466829	1579	Replication-associated
Node1160	OQ437926.1	13125	ORF1a_polyprotein	Homo sapiens	Odocoileus virginianus	Coronaviridae_12	Coronaviridae	TRUE	-0.460819	1579	Replication-associated
Node1160	OQ437926.1	21195	ORF1ab_polyprotein	Homo sapiens	Odocoileus virginianus	Coronaviridae_12	Coronaviridae	TRUE	-0.219143	1579	Replication-associated
Node1160	OQ437935.1	669	membrane_glycoprotein	Homo sapiens	Odocoileus virginianus	Coronaviridae_12	Coronaviridae	TRUE	-0.265973	1579	Structural
Node1160	OQ437935.1	9897	ORF1a_polyprotein	Homo sapiens	Odocoileus virginianus	Coronaviridae_12	Coronaviridae	TRUE	-0.275227	1579	Replication-associated
Node1160	OQ437935.1	9897	ORF1ab_polyprotein	Homo sapiens	Odocoileus virginianus	Coronaviridae_12	Coronaviridae	TRUE	-0.275227	1579	Replication-associated
Node1160	OQ437938.1	20967	ORF1ab_polyprotein	Homo sapiens	Odocoileus virginianus	Coronaviridae_12	Coronaviridae	TRUE	-0.367205	1579	Replication-associated
Node1160	OQ437942.1	669	membrane_glycoprotein	Homo sapiens	Odocoileus virginianus	Coronaviridae_12	Coronaviridae	TRUE	-0.265973	1579	Structural
Node1160	OQ437942.1	1248	nucleocapsid_phosphoprotein	Homo sapiens	Odocoileus virginianus	Coronaviridae_12	Coronaviridae	TRUE	-0.380448	1579	Structural
Node1160	OQ437942.1	13125	ORF1a_polyprotein	Homo sapiens	Odocoileus virginianus	Coronaviridae_12	Coronaviridae	TRUE	-0.195719	1579	Replication-associated
Node1160	OQ437942.1	21195	ORF1ab_polyprotein	Homo sapiens	Odocoileus virginianus	Coronaviridae_12	Coronaviridae	TRUE	-0.458927	1579	Replication-associated
Node1160	OQ437942.1	3705	surface_glycoprotein	Homo sapiens	Odocoileus virginianus	Coronaviridae_12	Coronaviridae	TRUE	-0.746864	1579	Entry
Node1160	OQ437954.1	13125	ORF1a_polyprotein	Homo sapiens	Odocoileus virginianus	Coronaviridae_12	Coronaviridae	TRUE	-0.125191	1579	Replication-associated
Node1160	OQ437954.1	21150	ORF1ab_polyprotein	Homo sapiens	Odocoileus virginianus	Coronaviridae_12	Coronaviridae	TRUE	-0.0484451	1579	Replication-associated
Node1160	OQ437954.1	360	ORF8_protein	Homo sapiens	Odocoileus virginianus	Coronaviridae_12	Coronaviridae	TRUE	-0.261685	1579	Auxiliary
Node1160	OQ437971.1	12897	ORF1a_polyprotein	Homo sapiens	Odocoileus virginianus	Coronaviridae_12	Coronaviridae	TRUE	-0.748664	1579	Replication-associated
Node1160	OQ437971.1	20967	ORF1ab_polyprotein	Homo sapiens	Odocoileus virginianus	Coronaviridae_12	Coronaviridae	TRUE	-0.416579	1579	Replication-associated
Node1171	OP006312.1	11118	ORF1a_polyprotein	Homo sapiens	Odocoileus virginianus	Coronaviridae_12	Coronaviridae	TRUE	-0.57474	1579	Replication-associated
Node1171	OP006312.1	18540	ORF1ab_polyprotein	Homo sapiens	Odocoileus virginianus	Coronaviridae_12	Coronaviridae	TRUE	-1.11757	1579	Replication-associated
Node1171	OP006318.1	17385	ORF1ab_polyprotein	Homo sapiens	Odocoileus virginianus	Coronaviridae_12	Coronaviridae	TRUE	-0.269889	1579	Replication-associated
Node1171	OP006394.1	20943	ORF1ab_polyprotein	Homo sapiens	Odocoileus virginianus	Coronaviridae_12	Coronaviridae	TRUE	-1.27115	1579	Replication-associated
Node1171	OP006394.1	3591	surface_glycoprotein	Homo sapiens	Odocoileus virginianus	Coronaviridae_12	Coronaviridae	TRUE	-0.270237	1579	Entry
Node1171	OP006415.1	13014	ORF1a_polyprotein	Homo sapiens	Odocoileus virginianus	Coronaviridae_12	Coronaviridae	TRUE	-0.874059	1579	Replication-associated
Node1171	OP006415.1	20946	ORF1ab_polyprotein	Homo sapiens	Odocoileus virginianus	Coronaviridae_12	Coronaviridae	TRUE	-0.944475	1579	Replication-associated
Node1171	OP006422.1	19926	ORF1ab_polyprotein	Homo sapiens	Odocoileus virginianus	Coronaviridae_12	Coronaviridae	TRUE	-1.19743	1579	Replication-associated
Node1176	OP006437.1	12774	ORF1a_polyprotein	Homo sapiens	Odocoileus virginianus	Coronaviridae_12	Coronaviridae	TRUE	-0.361138	1579	Replication-associated
Node1176	OP006437.1	20445	ORF1ab_polyprotein	Homo sapiens	Odocoileus virginianus	Coronaviridae_12	Coronaviridae	TRUE	-0.499144	1579	Replication-associated
Node1176	OP006437.1	3513	surface_glycoprotein	Homo sapiens	Odocoileus virginianus	Coronaviridae_12	Coronaviridae	TRUE	-0.326698	1579	Entry
Node1176	OQ437914.1	13125	ORF1a_polyprotein	Homo sapiens	Odocoileus virginianus	Coronaviridae_12	Coronaviridae	TRUE	-0.292501	1579	Replication-associated
Node1176	OQ437914.1	21195	ORF1ab_polyprotein	Homo sapiens	Odocoileus virginianus	Coronaviridae_12	Coronaviridae	TRUE	-0.288186	1579	Replication-associated
Node1176	OQ437955.1	12678	ORF1a_polyprotein	Homo sapiens	Odocoileus virginianus	Coronaviridae_12	Coronaviridae	TRUE	-0.57301	1579	Replication-associated
Node1176	OQ437955.1	20748	ORF1ab_polyprotein	Homo sapiens	Odocoileus virginianus	Coronaviridae_12	Coronaviridae	TRUE	-0.638766	1579	Replication-associated
Node1176	OQ437955.1	3639	surface_glycoprotein	Homo sapiens	Odocoileus virginianus	Coronaviridae_12	Coronaviridae	TRUE	-0.0253119	1579	Entry
Node1179	ON564663.1	6561	ORF1ab_polyprotein	Homo sapiens	Capra hircus	Coronaviridae_12	Coronaviridae	TRUE	-0.270326	1579	Replication-associated
Node1179	ON564668.1	18105	ORF1ab_polyprotein	Homo sapiens	Ovis aries	Coronaviridae_12	Coronaviridae	TRUE	-0.270481	1579	Replication-associated
Node1183	ON564674.1	19302	ORF1ab_polyprotein	Capra hircus	Bos taurus	Coronaviridae_12	Coronaviridae	TRUE	-0.389193	1579	Replication-associated
Node1186	OP006401.1	12996	ORF1a_polyprotein	Homo sapiens	Odocoileus virginianus	Coronaviridae_12	Coronaviridae	TRUE	-1.21351	1579	Replication-associated
Node1186	OP006401.1	20931	ORF1ab_polyprotein	Homo sapiens	Odocoileus virginianus	Coronaviridae_12	Coronaviridae	TRUE	-0.787774	1579	Replication-associated
Node1189	OM181948.1	1248	nucleocapsid_phosphoprotein	Homo sapiens	Panthera leo	Coronaviridae_12	Coronaviridae	TRUE	-0.269858	1579	Structural
Node1189	OM181948.1	21195	ORF1ab_polyprotein	Homo sapiens	Panthera leo	Coronaviridae_12	Coronaviridae	TRUE	-0.866781	1579	Replication-associated
Node1189	OM181949.1	1248	nucleocapsid_phosphoprotein	Homo sapiens	Panthera leo	Coronaviridae_12	Coronaviridae	TRUE	-0.269858	1579	Structural
Node1189	OM181950.1	1248	nucleocapsid_phosphoprotein	Homo sapiens	Panthera leo	Coronaviridae_12	Coronaviridae	TRUE	-0.269858	1579	Structural
Node1189	OM181952.1	1224	nucleocapsid_phosphoprotein	Homo sapiens	Panthera leo	Coronaviridae_12	Coronaviridae	TRUE	-0.27081	1579	Structural
Node1189	OM181953.1	1248	nucleocapsid_phosphoprotein	Homo sapiens	Panthera leo	Coronaviridae_12	Coronaviridae	TRUE	-0.269858	1579	Structural
Node1189	OM181954.1	1248	nucleocapsid_phosphoprotein	Homo sapiens	Panthera leo	Coronaviridae_12	Coronaviridae	TRUE	-0.269858	1579	Structural
Node1189	OM181955.1	1248	nucleocapsid_phosphoprotein	Homo sapiens	Panthera leo	Coronaviridae_12	Coronaviridae	TRUE	-0.269858	1579	Structural
Node1189	OM181956.1	1248	nucleocapsid_phosphoprotein	Homo sapiens	Panthera leo	Coronaviridae_12	Coronaviridae	TRUE	-0.269858	1579	Structural
Node1189	OM181956.1	13032	ORF1a_polyprotein	Homo sapiens	Panthera leo	Coronaviridae_12	Coronaviridae	TRUE	-0.748208	1579	Replication-associated
Node1189	OM181956.1	21102	ORF1ab_polyprotein	Homo sapiens	Panthera leo	Coronaviridae_12	Coronaviridae	TRUE	-0.747309	1579	Replication-associated
Node1189	OM181957.1	1248	nucleocapsid_phosphoprotein	Homo sapiens	Panthera leo	Coronaviridae_12	Coronaviridae	TRUE	-0.269858	1579	Structural
Node1189	OM181958.1	1248	nucleocapsid_phosphoprotein	Homo sapiens	Panthera leo	Coronaviridae_12	Coronaviridae	TRUE	-0.269858	1579	Structural
Node1189	OM181960.1	1248	nucleocapsid_phosphoprotein	Homo sapiens	Panthera leo	Coronaviridae_12	Coronaviridae	TRUE	-0.269858	1579	Structural
Node1206	OQ437985.1	12960	ORF1a_polyprotein	Homo sapiens	Odocoileus virginianus	Coronaviridae_12	Coronaviridae	TRUE	-0.598695	1579	Replication-associated
Node1206	OQ437985.1	21030	ORF1ab_polyprotein	Homo sapiens	Odocoileus virginianus	Coronaviridae_12	Coronaviridae	TRUE	-0.762994	1579	Replication-associated
Node1206	OQ437985.1	828	ORF3a_protein	Homo sapiens	Odocoileus virginianus	Coronaviridae_12	Coronaviridae	TRUE	-0.279484	1579	Auxiliary
Node1206	OQ437985.1	3702	surface_glycoprotein	Homo sapiens	Odocoileus virginianus	Coronaviridae_12	Coronaviridae	TRUE	-0.268567	1579	Entry
Node1206	OQ449343.1	10872	ORF1a_polyprotein	Homo sapiens	Odocoileus virginianus	Coronaviridae_12	Coronaviridae	TRUE	-0.667633	1579	Replication-associated
Node1206	OQ449343.1	18627	ORF1ab_polyprotein	Homo sapiens	Odocoileus virginianus	Coronaviridae_12	Coronaviridae	TRUE	-0.834478	1579	Replication-associated
Node1211	ON564649.1	11763	ORF1a_polyprotein	Capra hircus	Iguania	Coronaviridae_12	Coronaviridae	TRUE	-0.270765	1579	Replication-associated
Node1211	ON564649.1	11763	ORF1ab_polyprotein	Capra hircus	Iguania	Coronaviridae_12	Coronaviridae	TRUE	-0.270765	1579	Replication-associated
Node1215	OQ050882.1	13125	ORF1a_polyprotein	Capra hircus	Homo sapiens	Coronaviridae_12	Coronaviridae	TRUE	-0.271231	1579	Replication-associated
Node1215	OQ050882.1	21195	ORF1ab_polyprotein	Capra hircus	Homo sapiens	Coronaviridae_12	Coronaviridae	TRUE	-0.446381	1579	Replication-associated
Node1215	OQ050928.1	21195	ORF1ab_polyprotein	Capra hircus	Homo sapiens	Coronaviridae_12	Coronaviridae	TRUE	-0.805583	1579	Replication-associated
Node1215	OQ051803.1	13125	ORF1a_polyprotein	Capra hircus	Homo sapiens	Coronaviridae_12	Coronaviridae	TRUE	-0.388416	1579	Replication-associated
Node1215	OQ051803.1	21195	ORF1ab_polyprotein	Capra hircus	Homo sapiens	Coronaviridae_12	Coronaviridae	TRUE	-0.0882291	1579	Replication-associated
Node1215	OQ051878.1	1248	nucleocapsid_phosphoprotein	Capra hircus	Homo sapiens	Coronaviridae_12	Coronaviridae	TRUE	-0.270162	1579	Structural
Node1215	OQ051878.1	13125	ORF1a_polyprotein	Capra hircus	Homo sapiens	Coronaviridae_12	Coronaviridae	TRUE	0.0297685	1579	Replication-associated
Node1215	OQ051878.1	21195	ORF1ab_polyprotein	Capra hircus	Homo sapiens	Coronaviridae_12	Coronaviridae	TRUE	-0.668483	1579	Replication-associated
Node1215	OQ051878.1	3705	surface_glycoprotein	Capra hircus	Homo sapiens	Coronaviridae_12	Coronaviridae	TRUE	-0.268594	1579	Entry
Node1215	OQ051990.1	13125	ORF1a_polyprotein	Capra hircus	Homo sapiens	Coronaviridae_12	Coronaviridae	TRUE	-0.68947	1579	Replication-associated
Node1215	OQ051990.1	21195	ORF1ab_polyprotein	Capra hircus	Homo sapiens	Coronaviridae_12	Coronaviridae	TRUE	-0.389496	1579	Replication-associated
Node1228	ON564671.1	10839	ORF1a_polyprotein	Capra hircus	Ovis aries	Coronaviridae_12	Coronaviridae	TRUE	-0.272448	1579	Replication-associated
Node1228	ON564671.1	17376	ORF1ab_polyprotein	Capra hircus	Ovis aries	Coronaviridae_12	Coronaviridae	TRUE	-0.271304	1579	Replication-associated
Node1230	OM570188.1	13125	ORF1a_polyprotein	Homo sapiens	Odocoileus virginianus	Coronaviridae_12	Coronaviridae	TRUE	-0.669474	1579	Replication-associated
Node1230	OM570188.1	21195	ORF1ab_polyprotein	Homo sapiens	Odocoileus virginianus	Coronaviridae_12	Coronaviridae	TRUE	-0.784001	1579	Replication-associated
Node1230	OM570191.1	13125	ORF1a_polyprotein	Homo sapiens	Odocoileus virginianus	Coronaviridae_12	Coronaviridae	TRUE	-0.474262	1579	Replication-associated
Node1230	OM570191.1	21195	ORF1ab_polyprotein	Homo sapiens	Odocoileus virginianus	Coronaviridae_12	Coronaviridae	TRUE	-0.359544	1579	Replication-associated
Node1230	OM570193.1	13125	ORF1a_polyprotein	Homo sapiens	Odocoileus virginianus	Coronaviridae_12	Coronaviridae	TRUE	-0.474262	1579	Replication-associated
Node1230	OM570193.1	21195	ORF1ab_polyprotein	Homo sapiens	Odocoileus virginianus	Coronaviridae_12	Coronaviridae	TRUE	-0.359544	1579	Replication-associated
Node1234	OP006379.1	12987	ORF1a_polyprotein	Homo sapiens	Odocoileus virginianus	Coronaviridae_12	Coronaviridae	TRUE	-0.271937	1579	Replication-associated
Node1234	OP006379.1	20922	ORF1ab_polyprotein	Homo sapiens	Odocoileus virginianus	Coronaviridae_12	Coronaviridae	TRUE	-0.270852	1579	Replication-associated
Node1234	OP006390.1	12840	ORF1a_polyprotein	Homo sapiens	Odocoileus virginianus	Coronaviridae_12	Coronaviridae	TRUE	0.427016	1579	Replication-associated
Node1234	OP006390.1	20775	ORF1ab_polyprotein	Homo sapiens	Odocoileus virginianus	Coronaviridae_12	Coronaviridae	TRUE	0.273244	1579	Replication-associated
Node1234	OP006390.1	828	ORF3a_protein	Homo sapiens	Odocoileus virginianus	Coronaviridae_12	Coronaviridae	TRUE	-0.651837	1579	Auxiliary
Node1234	OP006390.1	360	ORF8_protein	Homo sapiens	Odocoileus virginianus	Coronaviridae_12	Coronaviridae	TRUE	-0.261653	1579	Auxiliary
Node1240	OP006352.1	12996	ORF1a_polyprotein	Homo sapiens	Odocoileus virginianus	Coronaviridae_12	Coronaviridae	TRUE	-0.131234	1579	Replication-associated
Node1240	OP006352.1	20931	ORF1ab_polyprotein	Homo sapiens	Odocoileus virginianus	Coronaviridae_12	Coronaviridae	TRUE	-0.217634	1579	Replication-associated
Node1240	OP006352.1	3594	surface_glycoprotein	Homo sapiens	Odocoileus virginianus	Coronaviridae_12	Coronaviridae	TRUE	-0.270263	1579	Entry
Node1240	OP006420.1	12996	ORF1a_polyprotein	Homo sapiens	Odocoileus virginianus	Coronaviridae_12	Coronaviridae	TRUE	-0.326628	1579	Replication-associated
Node1240	OP006420.1	20931	ORF1ab_polyprotein	Homo sapiens	Odocoileus virginianus	Coronaviridae_12	Coronaviridae	TRUE	-0.528966	1579	Replication-associated
Node1240	OQ437927.1	12774	ORF1a_polyprotein	Homo sapiens	Odocoileus virginianus	Coronaviridae_12	Coronaviridae	TRUE	-0.668971	1579	Replication-associated
Node1240	OQ437927.1	20760	ORF1ab_polyprotein	Homo sapiens	Odocoileus virginianus	Coronaviridae_12	Coronaviridae	TRUE	-0.528098	1579	Replication-associated
Node1240	OQ437939.1	13062	ORF1a_polyprotein	Homo sapiens	Odocoileus virginianus	Coronaviridae_12	Coronaviridae	TRUE	-0.669658	1579	Replication-associated
Node1240	OQ437939.1	21132	ORF1ab_polyprotein	Homo sapiens	Odocoileus virginianus	Coronaviridae_12	Coronaviridae	TRUE	-0.571664	1579	Replication-associated
Node1240	OQ437940.1	13125	ORF1a_polyprotein	Homo sapiens	Odocoileus virginianus	Coronaviridae_12	Coronaviridae	TRUE	-0.870781	1579	Replication-associated
Node1240	OQ437940.1	21195	ORF1ab_polyprotein	Homo sapiens	Odocoileus virginianus	Coronaviridae_12	Coronaviridae	TRUE	-0.658088	1579	Replication-associated
Node1240	OQ437940.1	828	ORF3a_protein	Homo sapiens	Odocoileus virginianus	Coronaviridae_12	Coronaviridae	TRUE	-0.765105	1579	Auxiliary
Node1240	OQ437961.1	13125	ORF1a_polyprotein	Homo sapiens	Odocoileus virginianus	Coronaviridae_12	Coronaviridae	TRUE	-0.669474	1579	Replication-associated
Node1240	OQ437961.1	21195	ORF1ab_polyprotein	Homo sapiens	Odocoileus virginianus	Coronaviridae_12	Coronaviridae	TRUE	-0.60779	1579	Replication-associated
Node1240	OQ437982.1	12903	ORF1a_polyprotein	Homo sapiens	Odocoileus virginianus	Coronaviridae_12	Coronaviridae	TRUE	-0.803294	1579	Replication-associated
Node1240	OQ437982.1	20739	ORF1ab_polyprotein	Homo sapiens	Odocoileus virginianus	Coronaviridae_12	Coronaviridae	TRUE	-0.442406	1579	Replication-associated
Node1240	OQ437988.1	13122	ORF1a_polyprotein	Homo sapiens	Odocoileus virginianus	Coronaviridae_12	Coronaviridae	TRUE	-0.970548	1579	Replication-associated
Node1240	OQ437988.1	21192	ORF1ab_polyprotein	Homo sapiens	Odocoileus virginianus	Coronaviridae_12	Coronaviridae	TRUE	-0.803213	1579	Replication-associated
Node1272	OP006337.1	12555	ORF1a_polyprotein	Homo sapiens	Odocoileus virginianus	Coronaviridae_12	Coronaviridae	TRUE	-1.04327	1579	Replication-associated
Node1272	OP006337.1	20247	ORF1ab_polyprotein	Homo sapiens	Odocoileus virginianus	Coronaviridae_12	Coronaviridae	TRUE	-0.911738	1579	Replication-associated
Node1272	OP006337.1	3195	surface_glycoprotein	Homo sapiens	Odocoileus virginianus	Coronaviridae_12	Coronaviridae	TRUE	-0.270064	1579	Entry
Node1272	OP006380.1	12168	ORF1a_polyprotein	Homo sapiens	Odocoileus virginianus	Coronaviridae_12	Coronaviridae	TRUE	-0.439931	1579	Replication-associated
Node1272	OP006380.1	19005	ORF1ab_polyprotein	Homo sapiens	Odocoileus virginianus	Coronaviridae_12	Coronaviridae	TRUE	-0.518346	1579	Replication-associated
Node1272	OP006410.1	12996	ORF1a_polyprotein	Homo sapiens	Odocoileus virginianus	Coronaviridae_12	Coronaviridae	TRUE	-0.611046	1579	Replication-associated
Node1272	OP006410.1	20931	ORF1ab_polyprotein	Homo sapiens	Odocoileus virginianus	Coronaviridae_12	Coronaviridae	TRUE	-0.442824	1579	Replication-associated
Node1272	OP006410.1	3594	surface_glycoprotein	Homo sapiens	Odocoileus virginianus	Coronaviridae_12	Coronaviridae	TRUE	-0.270263	1579	Entry
Node1282	ON982606.1	13125	ORF1a_polyprotein	Homo sapiens	Felis catus	Coronaviridae_12	Coronaviridae	TRUE	-0.447547	1579	Replication-associated
Node1282	ON982606.1	21195	ORF1ab_polyprotein	Homo sapiens	Felis catus	Coronaviridae_12	Coronaviridae	TRUE	-0.172414	1579	Replication-associated
Node1282	ON982606.1	366	ORF7a_protein	Homo sapiens	Felis catus	Coronaviridae_12	Coronaviridae	TRUE	-0.25772	1579	Auxiliary
Node1282	ON982606.1	3708	surface_glycoprotein	Homo sapiens	Felis catus	Coronaviridae_12	Coronaviridae	TRUE	-0.269136	1579	Entry
Node1283	ON982612.1	13125	ORF1a_polyprotein	Homo sapiens	Canis lupus familiaris	Coronaviridae_12	Coronaviridae	TRUE	-0.271239	1579	Replication-associated
Node1283	ON982612.1	21195	ORF1ab_polyprotein	Homo sapiens	Canis lupus familiaris	Coronaviridae_12	Coronaviridae	TRUE	-0.270286	1579	Replication-associated
Node1289	OP006297.1	12843	ORF1a_polyprotein	Homo sapiens	Odocoileus virginianus	Coronaviridae_12	Coronaviridae	TRUE	0.169271	1579	Replication-associated
Node1289	OP006297.1	20778	ORF1ab_polyprotein	Homo sapiens	Odocoileus virginianus	Coronaviridae_12	Coronaviridae	TRUE	-0.0255364	1579	Replication-associated
Node1289	OP006300.1	13047	ORF1a_polyprotein	Homo sapiens	Odocoileus virginianus	Coronaviridae_12	Coronaviridae	TRUE	0.30422	1579	Replication-associated
Node1289	OP006300.1	20982	ORF1ab_polyprotein	Homo sapiens	Odocoileus virginianus	Coronaviridae_12	Coronaviridae	TRUE	0.0835429	1579	Replication-associated
Node1289	OP006316.1	12831	ORF1a_polyprotein	Homo sapiens	Odocoileus virginianus	Coronaviridae_12	Coronaviridae	TRUE	-0.0716916	1579	Replication-associated
Node1289	OP006316.1	20766	ORF1ab_polyprotein	Homo sapiens	Odocoileus virginianus	Coronaviridae_12	Coronaviridae	TRUE	-0.131336	1579	Replication-associated
Node1289	OP006333.1	13050	ORF1a_polyprotein	Homo sapiens	Odocoileus virginianus	Coronaviridae_12	Coronaviridae	TRUE	-0.131164	1579	Replication-associated
Node1289	OP006333.1	20985	ORF1ab_polyprotein	Homo sapiens	Odocoileus virginianus	Coronaviridae_12	Coronaviridae	TRUE	0.151043	1579	Replication-associated
Node1289	OP006333.1	3591	surface_glycoprotein	Homo sapiens	Odocoileus virginianus	Coronaviridae_12	Coronaviridae	TRUE	-0.388799	1579	Entry
Node1289	OP006430.1	13047	ORF1a_polyprotein	Homo sapiens	Odocoileus virginianus	Coronaviridae_12	Coronaviridae	TRUE	-0.572843	1579	Replication-associated
Node1289	OP006430.1	20976	ORF1ab_polyprotein	Homo sapiens	Odocoileus virginianus	Coronaviridae_12	Coronaviridae	TRUE	-0.528705	1579	Replication-associated
Node1289	OP006432.1	13050	ORF1a_polyprotein	Homo sapiens	Odocoileus virginianus	Coronaviridae_12	Coronaviridae	TRUE	-0.395386	1579	Replication-associated
Node1289	OP006432.1	20985	ORF1ab_polyprotein	Homo sapiens	Odocoileus virginianus	Coronaviridae_12	Coronaviridae	TRUE	-0.227845	1579	Replication-associated
Node1289	OP006432.1	3594	surface_glycoprotein	Homo sapiens	Odocoileus virginianus	Coronaviridae_12	Coronaviridae	TRUE	0.276706	1579	Entry
Node1289	OP006433.1	13050	ORF1a_polyprotein	Homo sapiens	Odocoileus virginianus	Coronaviridae_12	Coronaviridae	TRUE	0.170052	1579	Replication-associated
Node1289	OP006433.1	20985	ORF1ab_polyprotein	Homo sapiens	Odocoileus virginianus	Coronaviridae_12	Coronaviridae	TRUE	0.276059	1579	Replication-associated
Node1289	OP006433.1	3648	surface_glycoprotein	Homo sapiens	Odocoileus virginianus	Coronaviridae_12	Coronaviridae	TRUE	-0.022844	1579	Entry
Node1289	OP006435.1	12600	ORF1a_polyprotein	Homo sapiens	Odocoileus virginianus	Coronaviridae_12	Coronaviridae	TRUE	-0.628741	1579	Replication-associated
Node1289	OP006435.1	20535	ORF1ab_polyprotein	Homo sapiens	Odocoileus virginianus	Coronaviridae_12	Coronaviridae	TRUE	-0.472143	1579	Replication-associated
Node1289	OP006435.1	3486	surface_glycoprotein	Homo sapiens	Odocoileus virginianus	Coronaviridae_12	Coronaviridae	TRUE	-0.0259803	1579	Entry
Node1289	OP006440.1	12789	ORF1a_polyprotein	Homo sapiens	Odocoileus virginianus	Coronaviridae_12	Coronaviridae	TRUE	0.575946	1579	Replication-associated
Node1289	OP006440.1	20721	ORF1ab_polyprotein	Homo sapiens	Odocoileus virginianus	Coronaviridae_12	Coronaviridae	TRUE	-0.187339	1579	Replication-associated
Node1318	OP006442.1	12996	ORF1a_polyprotein	Homo sapiens	Odocoileus virginianus	Coronaviridae_12	Coronaviridae	TRUE	-0.598845	1579	Replication-associated
Node1318	OP006442.1	20931	ORF1ab_polyprotein	Homo sapiens	Odocoileus virginianus	Coronaviridae_12	Coronaviridae	TRUE	-0.56305	1579	Replication-associated
Node1318	OQ437950.1	13122	ORF1a_polyprotein	Homo sapiens	Odocoileus virginianus	Coronaviridae_12	Coronaviridae	TRUE	-0.394273	1579	Replication-associated
Node1318	OQ437950.1	20886	ORF1ab_polyprotein	Homo sapiens	Odocoileus virginianus	Coronaviridae_12	Coronaviridae	TRUE	-0.267743	1579	Replication-associated
Node1318	OQ437981.1	13125	ORF1a_polyprotein	Homo sapiens	Odocoileus virginianus	Coronaviridae_12	Coronaviridae	TRUE	0.0299008	1579	Replication-associated
Node1318	OQ437981.1	21024	ORF1ab_polyprotein	Homo sapiens	Odocoileus virginianus	Coronaviridae_12	Coronaviridae	TRUE	0.0133847	1579	Replication-associated
Node1318	OQ437990.1	13125	ORF1a_polyprotein	Homo sapiens	Odocoileus virginianus	Coronaviridae_12	Coronaviridae	TRUE	-0.572723	1579	Replication-associated
Node1318	OQ437990.1	21048	ORF1ab_polyprotein	Homo sapiens	Odocoileus virginianus	Coronaviridae_12	Coronaviridae	TRUE	-0.297163	1579	Replication-associated
Node1318	OQ449344.1	13125	ORF1a_polyprotein	Homo sapiens	Odocoileus virginianus	Coronaviridae_12	Coronaviridae	TRUE	-0.374574	1579	Replication-associated
Node1318	OQ449344.1	21195	ORF1ab_polyprotein	Homo sapiens	Odocoileus virginianus	Coronaviridae_12	Coronaviridae	TRUE	-0.269131	1579	Replication-associated
Node1320	ON670120.1	21195	ORF1ab_polyprotein	Odocoileus virginianus	Homo sapiens	Coronaviridae_12	Coronaviridae	TRUE	-0.389492	1579	Replication-associated
Node1320	ON670144.1	21195	ORF1ab_polyprotein	Odocoileus virginianus	Homo sapiens	Coronaviridae_12	Coronaviridae	TRUE	-0.0884896	1579	Replication-associated
Node1320	ON670468.1	13125	ORF1a_polyprotein	Odocoileus virginianus	Homo sapiens	Coronaviridae_12	Coronaviridae	TRUE	-0.0248702	1579	Replication-associated
Node1320	ON670468.1	21195	ORF1ab_polyprotein	Odocoileus virginianus	Homo sapiens	Coronaviridae_12	Coronaviridae	TRUE	-0.40435	1579	Replication-associated
Node1320	ON671898.1	13125	ORF1a_polyprotein	Odocoileus virginianus	Homo sapiens	Coronaviridae_12	Coronaviridae	TRUE	-0.271239	1579	Replication-associated
Node1320	ON671898.1	21195	ORF1ab_polyprotein	Odocoileus virginianus	Homo sapiens	Coronaviridae_12	Coronaviridae	TRUE	-0.56023	1579	Replication-associated
Node1331	OM475741.1	12834	ORF1a_polyprotein	Homo sapiens	Cricetinae	Coronaviridae_12	Coronaviridae	TRUE	-0.345552	1579	Replication-associated
Node1331	OM475741.1	20613	ORF1ab_polyprotein	Homo sapiens	Cricetinae	Coronaviridae_12	Coronaviridae	TRUE	-0.169959	1579	Replication-associated
Node1331	OM475741.1	828	ORF3a_protein	Homo sapiens	Cricetinae	Coronaviridae_12	Coronaviridae	TRUE	-0.0942323	1579	Auxiliary
Node1331	OM475741.1	3705	surface_glycoprotein	Homo sapiens	Cricetinae	Coronaviridae_12	Coronaviridae	TRUE	0.171942	1579	Entry
Node1331	OM475742.1	12870	ORF1a_polyprotein	Homo sapiens	Cricetinae	Coronaviridae_12	Coronaviridae	TRUE	-0.169607	1579	Replication-associated
Node1331	OM475742.1	20649	ORF1ab_polyprotein	Homo sapiens	Cricetinae	Coronaviridae_12	Coronaviridae	TRUE	-0.04508	1579	Replication-associated
Node1331	OM475742.1	828	ORF3a_protein	Homo sapiens	Cricetinae	Coronaviridae_12	Coronaviridae	TRUE	-0.0942323	1579	Auxiliary
Node1331	OM475742.1	3705	surface_glycoprotein	Homo sapiens	Cricetinae	Coronaviridae_12	Coronaviridae	TRUE	0.208141	1579	Entry
Node1331	OM475743.1	12834	ORF1a_polyprotein	Homo sapiens	Cricetinae	Coronaviridae_12	Coronaviridae	TRUE	-0.169324	1579	Replication-associated
Node1331	OM475743.1	20472	ORF1ab_polyprotein	Homo sapiens	Cricetinae	Coronaviridae_12	Coronaviridae	TRUE	-0.0448965	1579	Replication-associated
Node1331	OM475743.1	828	ORF3a_protein	Homo sapiens	Cricetinae	Coronaviridae_12	Coronaviridae	TRUE	-0.0942323	1579	Auxiliary
Node1331	OM475743.1	3705	surface_glycoprotein	Homo sapiens	Cricetinae	Coronaviridae_12	Coronaviridae	TRUE	0.208141	1579	Entry
Node1331	OM475744.1	12819	ORF1a_polyprotein	Homo sapiens	Cricetinae	Coronaviridae_12	Coronaviridae	TRUE	-0.169385	1579	Replication-associated
Node1331	OM475744.1	20160	ORF1ab_polyprotein	Homo sapiens	Cricetinae	Coronaviridae_12	Coronaviridae	TRUE	-0.0449438	1579	Replication-associated
Node1331	OM475744.1	828	ORF3a_protein	Homo sapiens	Cricetinae	Coronaviridae_12	Coronaviridae	TRUE	-0.0942323	1579	Auxiliary
Node1331	OM475744.1	3705	surface_glycoprotein	Homo sapiens	Cricetinae	Coronaviridae_12	Coronaviridae	TRUE	0.208141	1579	Entry
Node1331	OM475745.1	13122	ORF1a_polyprotein	Homo sapiens	Cricetinae	Coronaviridae_12	Coronaviridae	TRUE	-0.217779	1579	Replication-associated
Node1331	OM475745.1	20901	ORF1ab_polyprotein	Homo sapiens	Cricetinae	Coronaviridae_12	Coronaviridae	TRUE	-0.122039	1579	Replication-associated
Node1331	OM475745.1	828	ORF3a_protein	Homo sapiens	Cricetinae	Coronaviridae_12	Coronaviridae	TRUE	-0.0942323	1579	Auxiliary
Node1331	OM475745.1	3705	surface_glycoprotein	Homo sapiens	Cricetinae	Coronaviridae_12	Coronaviridae	TRUE	0.031869	1579	Entry
Node1331	OM475746.1	12837	ORF1a_polyprotein	Homo sapiens	Cricetinae	Coronaviridae_12	Coronaviridae	TRUE	-0.217379	1579	Replication-associated
Node1331	OM475746.1	20175	ORF1ab_polyprotein	Homo sapiens	Cricetinae	Coronaviridae_12	Coronaviridae	TRUE	-0.121816	1579	Replication-associated
Node1331	OM475746.1	828	ORF3a_protein	Homo sapiens	Cricetinae	Coronaviridae_12	Coronaviridae	TRUE	-0.0942323	1579	Auxiliary
Node1331	OM475746.1	3705	surface_glycoprotein	Homo sapiens	Cricetinae	Coronaviridae_12	Coronaviridae	TRUE	0.031869	1579	Entry
Node1331	OP006344.1	12792	ORF1a_polyprotein	Homo sapiens	Odocoileus virginianus	Coronaviridae_12	Coronaviridae	TRUE	-0.726426	1579	Replication-associated
Node1331	OP006344.1	20727	ORF1ab_polyprotein	Homo sapiens	Odocoileus virginianus	Coronaviridae_12	Coronaviridae	TRUE	-0.611019	1579	Replication-associated
Node1331	OP006344.1	366	ORF7a_protein	Homo sapiens	Odocoileus virginianus	Coronaviridae_12	Coronaviridae	TRUE	0.045178	1579	Auxiliary
Node1331	OP006344.1	3165	surface_glycoprotein	Homo sapiens	Odocoileus virginianus	Coronaviridae_12	Coronaviridae	TRUE	0.0302617	1579	Entry
Node1331	OQ437978.1	1248	nucleocapsid_phosphoprotein	Homo sapiens	Odocoileus virginianus	Coronaviridae_12	Coronaviridae	TRUE	-0.572756	1579	Structural
Node1331	OQ437978.1	13125	ORF1a_polyprotein	Homo sapiens	Odocoileus virginianus	Coronaviridae_12	Coronaviridae	TRUE	-0.53559	1579	Replication-associated
Node1331	OQ437978.1	21195	ORF1ab_polyprotein	Homo sapiens	Odocoileus virginianus	Coronaviridae_12	Coronaviridae	TRUE	-0.664404	1579	Replication-associated
Node1331	OQ437978.1	3705	surface_glycoprotein	Homo sapiens	Odocoileus virginianus	Coronaviridae_12	Coronaviridae	TRUE	-0.26911	1579	Entry
Node1343	OP006407.1	12726	ORF1a_polyprotein	Homo sapiens	Odocoileus virginianus	Coronaviridae_12	Coronaviridae	TRUE	-0.43298	1579	Replication-associated
Node1343	OP006407.1	19878	ORF1ab_polyprotein	Homo sapiens	Odocoileus virginianus	Coronaviridae_12	Coronaviridae	TRUE	-0.541862	1579	Replication-associated
Node1345	ON982604.1	13125	ORF1a_polyprotein	Homo sapiens	Felis catus	Coronaviridae_12	Coronaviridae	TRUE	0.0297687	1579	Replication-associated
Node1345	ON982604.1	21195	ORF1ab_polyprotein	Homo sapiens	Felis catus	Coronaviridae_12	Coronaviridae	TRUE	-0.130647	1579	Replication-associated
Node1369	ON380661.1	12999	ORF1a_polyprotein	Homo sapiens	Felis catus	Coronaviridae_12	Coronaviridae	TRUE	-0.271554	1579	Replication-associated
Node1369	ON380661.1	21012	ORF1ab_polyprotein	Homo sapiens	Felis catus	Coronaviridae_12	Coronaviridae	TRUE	-0.571427	1579	Replication-associated
Node1384	MZ413341.1	21189	ORF1ab_polyprotein	Homo sapiens	Panthera leo persica	Coronaviridae_12	Coronaviridae	TRUE	-0.0886785	1579	Replication-associated
Node1392	OP006425.1	12993	ORF1a_polyprotein	Homo sapiens	Odocoileus virginianus	Coronaviridae_12	Coronaviridae	TRUE	-0.272301	1579	Replication-associated
Node1392	OP006425.1	20928	ORF1ab_polyprotein	Homo sapiens	Odocoileus virginianus	Coronaviridae_12	Coronaviridae	TRUE	-0.338008	1579	Replication-associated
Node1392	OQ437934.1	669	membrane_glycoprotein	Homo sapiens	Odocoileus virginianus	Coronaviridae_12	Coronaviridae	TRUE	-0.321485	1579	Structural
Node1392	OQ437934.1	21171	ORF1ab_polyprotein	Homo sapiens	Odocoileus virginianus	Coronaviridae_12	Coronaviridae	TRUE	-1.01937	1579	Replication-associated
Node1392	OQ437934.1	828	ORF3a_protein	Homo sapiens	Odocoileus virginianus	Coronaviridae_12	Coronaviridae	TRUE	-0.0318665	1579	Auxiliary
Node1392	OQ437934.1	345	ORF7a_protein	Homo sapiens	Odocoileus virginianus	Coronaviridae_12	Coronaviridae	TRUE	-0.255016	1579	Auxiliary
Node1392	OQ437934.1	3693	surface_glycoprotein	Homo sapiens	Odocoileus virginianus	Coronaviridae_12	Coronaviridae	TRUE	-0.269757	1579	Entry
Node1392	OQ437943.1	13125	ORF1a_polyprotein	Homo sapiens	Odocoileus virginianus	Coronaviridae_12	Coronaviridae	TRUE	-0.582916	1579	Replication-associated
Node1392	OQ437943.1	21195	ORF1ab_polyprotein	Homo sapiens	Odocoileus virginianus	Coronaviridae_12	Coronaviridae	TRUE	-0.649498	1579	Replication-associated
Node1392	OQ437943.1	366	ORF7a_protein	Homo sapiens	Odocoileus virginianus	Coronaviridae_12	Coronaviridae	TRUE	-0.564581	1579	Auxiliary
Node1392	OQ437943.1	3705	surface_glycoprotein	Homo sapiens	Odocoileus virginianus	Coronaviridae_12	Coronaviridae	TRUE	-0.56084	1579	Entry
Node1397	OL336792.1	13125	ORF1a_polyprotein	Homo sapiens	Felis catus	Coronaviridae_12	Coronaviridae	TRUE	-0.271604	1579	Replication-associated
Node1397	OL336792.1	21195	ORF1ab_polyprotein	Homo sapiens	Felis catus	Coronaviridae_12	Coronaviridae	TRUE	-0.270601	1579	Replication-associated
Node1397	OL336792.1	3705	surface_glycoprotein	Homo sapiens	Felis catus	Coronaviridae_12	Coronaviridae	TRUE	-0.269111	1579	Entry
Node1422	OP006319.1	12996	ORF1a_polyprotein	Homo sapiens	Odocoileus virginianus	Coronaviridae_12	Coronaviridae	TRUE	-0.175028	1579	Replication-associated
Node1422	OP006319.1	20931	ORF1ab_polyprotein	Homo sapiens	Odocoileus virginianus	Coronaviridae_12	Coronaviridae	TRUE	-0.442814	1579	Replication-associated
Node1422	OP006319.1	3594	surface_glycoprotein	Homo sapiens	Odocoileus virginianus	Coronaviridae_12	Coronaviridae	TRUE	-0.571888	1579	Entry
Node1422	OP006321.1	12996	ORF1a_polyprotein	Homo sapiens	Odocoileus virginianus	Coronaviridae_12	Coronaviridae	TRUE	-1.19481	1579	Replication-associated
Node1422	OP006321.1	20928	ORF1ab_polyprotein	Homo sapiens	Odocoileus virginianus	Coronaviridae_12	Coronaviridae	TRUE	-0.951319	1579	Replication-associated
Node1431	MT628700.1	13125	ORF1a_polyprotein	Homo sapiens	Feliformia	Coronaviridae_12	Coronaviridae	TRUE	-0.388603	1579	Replication-associated
Node1431	MT628700.1	21195	ORF1ab_polyprotein	Homo sapiens	Feliformia	Coronaviridae_12	Coronaviridae	TRUE	-0.690778	1579	Replication-associated
Node1445	MW856303.1	21195	ORF1ab_polyprotein	Homo sapiens	Felis catus	Coronaviridae_12	Coronaviridae	TRUE	-0.74776	1579	Replication-associated
Node1451	OP006339.1	11385	ORF1a_polyprotein	Homo sapiens	Odocoileus virginianus	Coronaviridae_12	Coronaviridae	TRUE	-0.271294	1579	Replication-associated
Node1451	OP006339.1	19395	ORF1ab_polyprotein	Homo sapiens	Odocoileus virginianus	Coronaviridae_12	Coronaviridae	TRUE	-0.379392	1579	Replication-associated
Node146	OP006351.1	12996	ORF1a_polyprotein	Homo sapiens	Odocoileus virginianus	Coronaviridae_12	Coronaviridae	TRUE	-0.657917	1579	Replication-associated
Node146	OP006351.1	20931	ORF1ab_polyprotein	Homo sapiens	Odocoileus virginianus	Coronaviridae_12	Coronaviridae	TRUE	-0.803954	1579	Replication-associated
Node146	OP006351.1	186	ORF6_protein	Homo sapiens	Odocoileus virginianus	Coronaviridae_12	Coronaviridae	TRUE	-0.122249	1579	Auxiliary
Node1468	OP006340.1	12342	ORF1a_polyprotein	Homo sapiens	Odocoileus virginianus	Coronaviridae_12	Coronaviridae	TRUE	-0.524353	1579	Replication-associated
Node1468	OP006340.1	6660	ORF1ab_polyprotein	Homo sapiens	Odocoileus virginianus	Coronaviridae_12	Coronaviridae	TRUE	0.0316323	1579	Replication-associated
Node1468	OP006340.1	2868	surface_glycoprotein	Homo sapiens	Odocoileus virginianus	Coronaviridae_12	Coronaviridae	TRUE	-0.392395	1579	Entry
Node1468	OP006341.1	12996	ORF1a_polyprotein	Homo sapiens	Odocoileus virginianus	Coronaviridae_12	Coronaviridae	TRUE	-0.498169	1579	Replication-associated
Node1468	OP006341.1	20931	ORF1ab_polyprotein	Homo sapiens	Odocoileus virginianus	Coronaviridae_12	Coronaviridae	TRUE	-0.344622	1579	Replication-associated
Node1468	OP006341.1	3591	surface_glycoprotein	Homo sapiens	Odocoileus virginianus	Coronaviridae_12	Coronaviridae	TRUE	-0.389745	1579	Entry
Node147	OL790398.1	13110	ORF1a_polyprotein	Homo sapiens	Odocoileus virginianus	Coronaviridae_12	Coronaviridae	TRUE	-0.461299	1579	Replication-associated
Node147	OL790398.1	21180	ORF1ab_polyprotein	Homo sapiens	Odocoileus virginianus	Coronaviridae_12	Coronaviridae	TRUE	-0.430914	1579	Replication-associated
Node147	OL790401.1	13110	ORF1a_polyprotein	Homo sapiens	Odocoileus virginianus	Coronaviridae_12	Coronaviridae	TRUE	-0.495423	1579	Replication-associated
Node147	OL790401.1	21180	ORF1ab_polyprotein	Homo sapiens	Odocoileus virginianus	Coronaviridae_12	Coronaviridae	TRUE	-0.415124	1579	Replication-associated
Node147	OL790402.1	13110	ORF1a_polyprotein	Homo sapiens	Odocoileus virginianus	Coronaviridae_12	Coronaviridae	TRUE	-0.537035	1579	Replication-associated
Node147	OL790402.1	21180	ORF1ab_polyprotein	Homo sapiens	Odocoileus virginianus	Coronaviridae_12	Coronaviridae	TRUE	-0.366381	1579	Replication-associated
Node147	OL790403.1	13110	ORF1a_polyprotein	Homo sapiens	Odocoileus virginianus	Coronaviridae_12	Coronaviridae	TRUE	-0.537035	1579	Replication-associated
Node147	OL790403.1	21180	ORF1ab_polyprotein	Homo sapiens	Odocoileus virginianus	Coronaviridae_12	Coronaviridae	TRUE	-0.435915	1579	Replication-associated
Node147	OL790404.1	13110	ORF1a_polyprotein	Homo sapiens	Odocoileus virginianus	Coronaviridae_12	Coronaviridae	TRUE	-0.47368	1579	Replication-associated
Node147	OL790404.1	20916	ORF1ab_polyprotein	Homo sapiens	Odocoileus virginianus	Coronaviridae_12	Coronaviridae	TRUE	-0.380765	1579	Replication-associated
Node147	OL790405.1	13110	ORF1a_polyprotein	Homo sapiens	Odocoileus virginianus	Coronaviridae_12	Coronaviridae	TRUE	-0.47368	1579	Replication-associated
Node147	OL790405.1	21180	ORF1ab_polyprotein	Homo sapiens	Odocoileus virginianus	Coronaviridae_12	Coronaviridae	TRUE	-0.381025	1579	Replication-associated
Node147	OL790406.1	13110	ORF1a_polyprotein	Homo sapiens	Odocoileus virginianus	Coronaviridae_12	Coronaviridae	TRUE	-0.47368	1579	Replication-associated
Node147	OL790406.1	21180	ORF1ab_polyprotein	Homo sapiens	Odocoileus virginianus	Coronaviridae_12	Coronaviridae	TRUE	-0.381025	1579	Replication-associated
Node1472	MT396266.1	21195	ORF1ab_polyprotein	Homo sapiens	Mustela lutreola	Coronaviridae_12	Coronaviridae	TRUE	0.0305032	1579	Replication-associated
Node1472	MT457390.1	21195	ORF1ab_polyprotein	Homo sapiens	Mustela lutreola	Coronaviridae_12	Coronaviridae	TRUE	-0.0249773	1579	Replication-associated
Node1472	MT457391.1	21195	ORF1ab_polyprotein	Homo sapiens	Mustela lutreola	Coronaviridae_12	Coronaviridae	TRUE	0.331596	1579	Replication-associated
Node1472	MT457391.1	3702	surface_glycoprotein	Homo sapiens	Mustela lutreola	Coronaviridae_12	Coronaviridae	TRUE	-0.388029	1579	Entry
Node1472	MT457392.1	13125	ORF1a_polyprotein	Homo sapiens	Mustela lutreola	Coronaviridae_12	Coronaviridae	TRUE	0.029538	1579	Replication-associated
Node1472	MT457392.1	21195	ORF1ab_polyprotein	Homo sapiens	Mustela lutreola	Coronaviridae_12	Coronaviridae	TRUE	-0.270627	1579	Replication-associated
Node1472	MT457393.1	21195	ORF1ab_polyprotein	Homo sapiens	Mustela lutreola	Coronaviridae_12	Coronaviridae	TRUE	0.206626	1579	Replication-associated
Node1472	MT457400.1	21195	ORF1ab_polyprotein	Homo sapiens	Mustela lutreola	Coronaviridae_12	Coronaviridae	TRUE	-0.0249773	1579	Replication-associated
Node1472	MT457400.1	828	ORF3a_protein	Homo sapiens	Mustela lutreola	Coronaviridae_12	Coronaviridae	TRUE	-0.281849	1579	Auxiliary
Node1472	MT457401.1	21195	ORF1ab_polyprotein	Homo sapiens	Mustela lutreola	Coronaviridae_12	Coronaviridae	TRUE	-0.0943803	1579	Replication-associated
Node1472	MT457401.1	3702	surface_glycoprotein	Homo sapiens	Mustela lutreola	Coronaviridae_12	Coronaviridae	TRUE	-0.388168	1579	Entry
Node1473	BS000704.1	1248	nucleocapsid_phosphoprotein	Mesocricetus auratus	Homo sapiens	Coronaviridae_12	Coronaviridae	TRUE	-0.321566	1579	Structural
Node1473	BS000704.1	20913	ORF1ab_polyprotein	Mesocricetus auratus	Homo sapiens	Coronaviridae_12	Coronaviridae	TRUE	-0.326657	1579	Replication-associated
Node1473	BS000774.1	13122	ORF1a_polyprotein	Mesocricetus auratus	Homo sapiens	Coronaviridae_12	Coronaviridae	TRUE	-0.0250635	1579	Replication-associated
Node1473	BS000774.1	21003	ORF1ab_polyprotein	Mesocricetus auratus	Homo sapiens	Coronaviridae_12	Coronaviridae	TRUE	-0.227685	1579	Replication-associated
Node1473	BS001101.1	1248	nucleocapsid_phosphoprotein	Mesocricetus auratus	Homo sapiens	Coronaviridae_12	Coronaviridae	TRUE	-0.018623	1579	Structural
Node1473	BS001101.1	21195	ORF1ab_polyprotein	Mesocricetus auratus	Homo sapiens	Coronaviridae_12	Coronaviridae	TRUE	-0.270601	1579	Replication-associated
Node1473	BS001128.1	1248	nucleocapsid_phosphoprotein	Mesocricetus auratus	Homo sapiens	Coronaviridae_12	Coronaviridae	TRUE	-0.164125	1579	Structural
Node1473	BS001128.1	13116	ORF1a_polyprotein	Mesocricetus auratus	Homo sapiens	Coronaviridae_12	Coronaviridae	TRUE	-0.873808	1579	Replication-associated
Node1473	BS001128.1	21006	ORF1ab_polyprotein	Mesocricetus auratus	Homo sapiens	Coronaviridae_12	Coronaviridae	TRUE	-0.394349	1579	Replication-associated
Node1473	BS001278.1	1248	nucleocapsid_phosphoprotein	Mesocricetus auratus	Homo sapiens	Coronaviridae_12	Coronaviridae	TRUE	-0.0232653	1579	Structural
Node1473	BS001278.1	13125	ORF1a_polyprotein	Mesocricetus auratus	Homo sapiens	Coronaviridae_12	Coronaviridae	TRUE	-0.070674	1579	Replication-associated
Node1473	BS001278.1	21195	ORF1ab_polyprotein	Mesocricetus auratus	Homo sapiens	Coronaviridae_12	Coronaviridae	TRUE	-0.301645	1579	Replication-associated
Node1473	BS001278.1	3705	surface_glycoprotein	Mesocricetus auratus	Homo sapiens	Coronaviridae_12	Coronaviridae	TRUE	0.412479	1579	Entry
Node1473	BS001500.1	1248	nucleocapsid_phosphoprotein	Mesocricetus auratus	Homo sapiens	Coronaviridae_12	Coronaviridae	TRUE	-0.0232653	1579	Structural
Node1473	BS001500.1	13125	ORF1a_polyprotein	Mesocricetus auratus	Homo sapiens	Coronaviridae_12	Coronaviridae	TRUE	0.105514	1579	Replication-associated
Node1473	BS001500.1	21195	ORF1ab_polyprotein	Mesocricetus auratus	Homo sapiens	Coronaviridae_12	Coronaviridae	TRUE	-0.459521	1579	Replication-associated
Node1473	BS001500.1	3705	surface_glycoprotein	Mesocricetus auratus	Homo sapiens	Coronaviridae_12	Coronaviridae	TRUE	0.412479	1579	Entry
Node1473	BS001630.1	13125	ORF1a_polyprotein	Mesocricetus auratus	Homo sapiens	Coronaviridae_12	Coronaviridae	TRUE	-0.1559	1579	Replication-associated
Node1473	BS001630.1	21195	ORF1ab_polyprotein	Mesocricetus auratus	Homo sapiens	Coronaviridae_12	Coronaviridae	TRUE	0.0525956	1579	Replication-associated
Node1473	BS001708.1	13125	ORF1a_polyprotein	Mesocricetus auratus	Homo sapiens	Coronaviridae_12	Coronaviridae	TRUE	0.00312348	1579	Replication-associated
Node1473	BS001708.1	21195	ORF1ab_polyprotein	Mesocricetus auratus	Homo sapiens	Coronaviridae_12	Coronaviridae	TRUE	0.225208	1579	Replication-associated
Node1473	BS001708.1	828	ORF3a_protein	Mesocricetus auratus	Homo sapiens	Coronaviridae_12	Coronaviridae	TRUE	-0.28067	1579	Auxiliary
Node1473	BS001974.1	13125	ORF1a_polyprotein	Mesocricetus auratus	Homo sapiens	Coronaviridae_12	Coronaviridae	TRUE	0.00311961	1579	Replication-associated
Node1473	BS001974.1	21195	ORF1ab_polyprotein	Mesocricetus auratus	Homo sapiens	Coronaviridae_12	Coronaviridae	TRUE	0.189065	1579	Replication-associated
Node1473	BS002075.1	13125	ORF1a_polyprotein	Mesocricetus auratus	Homo sapiens	Coronaviridae_12	Coronaviridae	TRUE	-0.0397141	1579	Replication-associated
Node1473	BS002075.1	21195	ORF1ab_polyprotein	Mesocricetus auratus	Homo sapiens	Coronaviridae_12	Coronaviridae	TRUE	0.128249	1579	Replication-associated
Node1473	BS002079.1	13125	ORF1a_polyprotein	Mesocricetus auratus	Homo sapiens	Coronaviridae_12	Coronaviridae	TRUE	0.0662468	1579	Replication-associated
Node1473	BS002079.1	21195	ORF1ab_polyprotein	Mesocricetus auratus	Homo sapiens	Coronaviridae_12	Coronaviridae	TRUE	0.341849	1579	Replication-associated
Node1473	BS002079.1	3705	surface_glycoprotein	Mesocricetus auratus	Homo sapiens	Coronaviridae_12	Coronaviridae	TRUE	0.494451	1579	Entry
Node1473	BS002463.1	1251	nucleocapsid_phosphoprotein	Mesocricetus auratus	Homo sapiens	Coronaviridae_12	Coronaviridae	TRUE	0.175991	1579	Structural
Node1473	BS002463.1	13119	ORF1a_polyprotein	Mesocricetus auratus	Homo sapiens	Coronaviridae_12	Coronaviridae	TRUE	-0.0972748	1579	Replication-associated
Node1473	BS002463.1	21189	ORF1ab_polyprotein	Mesocricetus auratus	Homo sapiens	Coronaviridae_12	Coronaviridae	TRUE	-0.0746395	1579	Replication-associated
Node1473	BS002463.1	3702	surface_glycoprotein	Mesocricetus auratus	Homo sapiens	Coronaviridae_12	Coronaviridae	TRUE	0.615697	1579	Entry
Node1473	BS002762.1	1251	nucleocapsid_phosphoprotein	Mesocricetus auratus	Homo sapiens	Coronaviridae_12	Coronaviridae	TRUE	0.175991	1579	Structural
Node1473	BS002762.1	13119	ORF1a_polyprotein	Mesocricetus auratus	Homo sapiens	Coronaviridae_12	Coronaviridae	TRUE	-0.169538	1579	Replication-associated
Node1473	BS002762.1	21189	ORF1ab_polyprotein	Mesocricetus auratus	Homo sapiens	Coronaviridae_12	Coronaviridae	TRUE	-0.128888	1579	Replication-associated
Node1473	BS002762.1	3702	surface_glycoprotein	Mesocricetus auratus	Homo sapiens	Coronaviridae_12	Coronaviridae	TRUE	1.14971	1579	Entry
Node1473	BS002885.1	1251	nucleocapsid_phosphoprotein	Mesocricetus auratus	Homo sapiens	Coronaviridae_12	Coronaviridae	TRUE	0.175991	1579	Structural
Node1473	BS002885.1	13119	ORF1a_polyprotein	Mesocricetus auratus	Homo sapiens	Coronaviridae_12	Coronaviridae	TRUE	-0.259022	1579	Replication-associated
Node1473	BS002885.1	21189	ORF1ab_polyprotein	Mesocricetus auratus	Homo sapiens	Coronaviridae_12	Coronaviridae	TRUE	-0.202356	1579	Replication-associated
Node1473	BS002885.1	3702	surface_glycoprotein	Mesocricetus auratus	Homo sapiens	Coronaviridae_12	Coronaviridae	TRUE	1.14971	1579	Entry
Node1473	BS003157.1	1251	nucleocapsid_phosphoprotein	Mesocricetus auratus	Homo sapiens	Coronaviridae_12	Coronaviridae	TRUE	0.175991	1579	Structural
Node1473	BS003157.1	13119	ORF1a_polyprotein	Mesocricetus auratus	Homo sapiens	Coronaviridae_12	Coronaviridae	TRUE	-0.259243	1579	Replication-associated
Node1473	BS003157.1	21189	ORF1ab_polyprotein	Mesocricetus auratus	Homo sapiens	Coronaviridae_12	Coronaviridae	TRUE	-0.202442	1579	Replication-associated
Node1473	BS003157.1	3702	surface_glycoprotein	Mesocricetus auratus	Homo sapiens	Coronaviridae_12	Coronaviridae	TRUE	1.14971	1579	Entry
Node1473	BS003204.1	1251	nucleocapsid_phosphoprotein	Mesocricetus auratus	Homo sapiens	Coronaviridae_12	Coronaviridae	TRUE	0.0662192	1579	Structural
Node1473	BS003204.1	13119	ORF1a_polyprotein	Mesocricetus auratus	Homo sapiens	Coronaviridae_12	Coronaviridae	TRUE	0.0845216	1579	Replication-associated
Node1473	BS003204.1	21189	ORF1ab_polyprotein	Mesocricetus auratus	Homo sapiens	Coronaviridae_12	Coronaviridae	TRUE	0.0120205	1579	Replication-associated
Node1473	BS003204.1	3702	surface_glycoprotein	Mesocricetus auratus	Homo sapiens	Coronaviridae_12	Coronaviridae	TRUE	1.14971	1579	Entry
Node1473	BS003604.1	1251	nucleocapsid_phosphoprotein	Mesocricetus auratus	Homo sapiens	Coronaviridae_12	Coronaviridae	TRUE	0.175991	1579	Structural
Node1473	BS003604.1	13119	ORF1a_polyprotein	Mesocricetus auratus	Homo sapiens	Coronaviridae_12	Coronaviridae	TRUE	-0.169538	1579	Replication-associated
Node1473	BS003604.1	21189	ORF1ab_polyprotein	Mesocricetus auratus	Homo sapiens	Coronaviridae_12	Coronaviridae	TRUE	-0.128888	1579	Replication-associated
Node1473	BS003604.1	3702	surface_glycoprotein	Mesocricetus auratus	Homo sapiens	Coronaviridae_12	Coronaviridae	TRUE	1.14971	1579	Entry
Node1473	BS003735.1	1251	nucleocapsid_phosphoprotein	Mesocricetus auratus	Homo sapiens	Coronaviridae_12	Coronaviridae	TRUE	-0.124791	1579	Structural
Node1473	BS003735.1	13119	ORF1a_polyprotein	Mesocricetus auratus	Homo sapiens	Coronaviridae_12	Coronaviridae	TRUE	-0.138979	1579	Replication-associated
Node1473	BS003735.1	21189	ORF1ab_polyprotein	Mesocricetus auratus	Homo sapiens	Coronaviridae_12	Coronaviridae	TRUE	-0.111127	1579	Replication-associated
Node1473	BS003735.1	3702	surface_glycoprotein	Mesocricetus auratus	Homo sapiens	Coronaviridae_12	Coronaviridae	TRUE	1.14971	1579	Entry
Node1473	BS004090.1	1251	nucleocapsid_phosphoprotein	Mesocricetus auratus	Homo sapiens	Coronaviridae_12	Coronaviridae	TRUE	0.175991	1579	Structural
Node1473	BS004090.1	13119	ORF1a_polyprotein	Mesocricetus auratus	Homo sapiens	Coronaviridae_12	Coronaviridae	TRUE	-0.021943	1579	Replication-associated
Node1473	BS004090.1	21189	ORF1ab_polyprotein	Mesocricetus auratus	Homo sapiens	Coronaviridae_12	Coronaviridae	TRUE	0.0268277	1579	Replication-associated
Node1473	BS004090.1	3702	surface_glycoprotein	Mesocricetus auratus	Homo sapiens	Coronaviridae_12	Coronaviridae	TRUE	1.16633	1579	Entry
Node1473	BS004231.1	1251	nucleocapsid_phosphoprotein	Mesocricetus auratus	Homo sapiens	Coronaviridae_12	Coronaviridae	TRUE	0.369168	1579	Structural
Node1473	BS004231.1	13119	ORF1a_polyprotein	Mesocricetus auratus	Homo sapiens	Coronaviridae_12	Coronaviridae	TRUE	-0.323579	1579	Replication-associated
Node1473	BS004231.1	21189	ORF1ab_polyprotein	Mesocricetus auratus	Homo sapiens	Coronaviridae_12	Coronaviridae	TRUE	-0.188711	1579	Replication-associated
Node1473	BS004231.1	3702	surface_glycoprotein	Mesocricetus auratus	Homo sapiens	Coronaviridae_12	Coronaviridae	TRUE	0.844503	1579	Entry
Node1473	BS004290.1	669	membrane_glycoprotein	Mesocricetus auratus	Homo sapiens	Coronaviridae_12	Coronaviridae	TRUE	-0.321909	1579	Structural
Node1473	BS004290.1	1251	nucleocapsid_phosphoprotein	Mesocricetus auratus	Homo sapiens	Coronaviridae_12	Coronaviridae	TRUE	0.283157	1579	Structural
Node1473	BS004290.1	13125	ORF1a_polyprotein	Mesocricetus auratus	Homo sapiens	Coronaviridae_12	Coronaviridae	TRUE	-0.0939672	1579	Replication-associated
Node1473	BS004290.1	21195	ORF1ab_polyprotein	Mesocricetus auratus	Homo sapiens	Coronaviridae_12	Coronaviridae	TRUE	-0.147452	1579	Replication-associated
Node1473	BS004290.1	828	ORF3a_protein	Mesocricetus auratus	Homo sapiens	Coronaviridae_12	Coronaviridae	TRUE	-0.282724	1579	Auxiliary
Node1473	BS004290.1	186	ORF6_protein	Mesocricetus auratus	Homo sapiens	Coronaviridae_12	Coronaviridae	TRUE	-0.123303	1579	Auxiliary
Node1473	BS004290.1	3705	surface_glycoprotein	Mesocricetus auratus	Homo sapiens	Coronaviridae_12	Coronaviridae	TRUE	1.09636	1579	Entry
Node1473	BS004461.1	669	membrane_glycoprotein	Mesocricetus auratus	Homo sapiens	Coronaviridae_12	Coronaviridae	TRUE	-0.0174458	1579	Structural
Node1473	BS004461.1	1251	nucleocapsid_phosphoprotein	Mesocricetus auratus	Homo sapiens	Coronaviridae_12	Coronaviridae	TRUE	0.283157	1579	Structural
Node1473	BS004461.1	13125	ORF1a_polyprotein	Mesocricetus auratus	Homo sapiens	Coronaviridae_12	Coronaviridae	TRUE	-0.208368	1579	Replication-associated
Node1473	BS004461.1	21195	ORF1ab_polyprotein	Mesocricetus auratus	Homo sapiens	Coronaviridae_12	Coronaviridae	TRUE	-0.147452	1579	Replication-associated
Node1473	BS004461.1	828	ORF3a_protein	Mesocricetus auratus	Homo sapiens	Coronaviridae_12	Coronaviridae	TRUE	-0.0333396	1579	Auxiliary
Node1473	BS004461.1	186	ORF6_protein	Mesocricetus auratus	Homo sapiens	Coronaviridae_12	Coronaviridae	TRUE	-0.429324	1579	Auxiliary
Node1473	BS004461.1	3705	surface_glycoprotein	Mesocricetus auratus	Homo sapiens	Coronaviridae_12	Coronaviridae	TRUE	1.07688	1579	Entry
Node1473	BS004541.1	669	membrane_glycoprotein	Mesocricetus auratus	Homo sapiens	Coronaviridae_12	Coronaviridae	TRUE	-0.0174458	1579	Structural
Node1473	BS004541.1	1251	nucleocapsid_phosphoprotein	Mesocricetus auratus	Homo sapiens	Coronaviridae_12	Coronaviridae	TRUE	0.283157	1579	Structural
Node1473	BS004541.1	13125	ORF1a_polyprotein	Mesocricetus auratus	Homo sapiens	Coronaviridae_12	Coronaviridae	TRUE	-0.18606	1579	Replication-associated
Node1473	BS004541.1	21195	ORF1ab_polyprotein	Mesocricetus auratus	Homo sapiens	Coronaviridae_12	Coronaviridae	TRUE	-0.127325	1579	Replication-associated
Node1473	BS004541.1	828	ORF3a_protein	Mesocricetus auratus	Homo sapiens	Coronaviridae_12	Coronaviridae	TRUE	0.0190952	1579	Auxiliary
Node1473	BS004541.1	186	ORF6_protein	Mesocricetus auratus	Homo sapiens	Coronaviridae_12	Coronaviridae	TRUE	-0.123303	1579	Auxiliary
Node1473	BS004541.1	3705	surface_glycoprotein	Mesocricetus auratus	Homo sapiens	Coronaviridae_12	Coronaviridae	TRUE	1.09639	1579	Entry
Node1473	BS004748.1	669	membrane_glycoprotein	Mesocricetus auratus	Homo sapiens	Coronaviridae_12	Coronaviridae	TRUE	-0.0174458	1579	Structural
Node1473	BS004748.1	1251	nucleocapsid_phosphoprotein	Mesocricetus auratus	Homo sapiens	Coronaviridae_12	Coronaviridae	TRUE	-0.0197903	1579	Structural
Node1473	BS004748.1	13125	ORF1a_polyprotein	Mesocricetus auratus	Homo sapiens	Coronaviridae_12	Coronaviridae	TRUE	-0.039745	1579	Replication-associated
Node1473	BS004748.1	21195	ORF1ab_polyprotein	Mesocricetus auratus	Homo sapiens	Coronaviridae_12	Coronaviridae	TRUE	-0.0180623	1579	Replication-associated
Node1473	BS004748.1	828	ORF3a_protein	Mesocricetus auratus	Homo sapiens	Coronaviridae_12	Coronaviridae	TRUE	-0.282724	1579	Auxiliary
Node1473	BS004748.1	186	ORF6_protein	Mesocricetus auratus	Homo sapiens	Coronaviridae_12	Coronaviridae	TRUE	-0.429324	1579	Auxiliary
Node1473	BS004748.1	3705	surface_glycoprotein	Mesocricetus auratus	Homo sapiens	Coronaviridae_12	Coronaviridae	TRUE	1.07688	1579	Entry
Node1473	BS004763.1	669	membrane_glycoprotein	Mesocricetus auratus	Homo sapiens	Coronaviridae_12	Coronaviridae	TRUE	-0.318827	1579	Structural
Node1473	BS004763.1	1251	nucleocapsid_phosphoprotein	Mesocricetus auratus	Homo sapiens	Coronaviridae_12	Coronaviridae	TRUE	0.0913551	1579	Structural
Node1473	BS004763.1	13125	ORF1a_polyprotein	Mesocricetus auratus	Homo sapiens	Coronaviridae_12	Coronaviridae	TRUE	-0.0274423	1579	Replication-associated
Node1473	BS004763.1	21195	ORF1ab_polyprotein	Mesocricetus auratus	Homo sapiens	Coronaviridae_12	Coronaviridae	TRUE	-0.0116959	1579	Replication-associated
Node1473	BS004763.1	828	ORF3a_protein	Mesocricetus auratus	Homo sapiens	Coronaviridae_12	Coronaviridae	TRUE	0.0190952	1579	Auxiliary
Node1473	BS004763.1	186	ORF6_protein	Mesocricetus auratus	Homo sapiens	Coronaviridae_12	Coronaviridae	TRUE	-0.429324	1579	Auxiliary
Node1473	BS004763.1	3705	surface_glycoprotein	Mesocricetus auratus	Homo sapiens	Coronaviridae_12	Coronaviridae	TRUE	1.09178	1579	Entry
Node1473	BS004835.1	669	membrane_glycoprotein	Mesocricetus auratus	Homo sapiens	Coronaviridae_12	Coronaviridae	TRUE	-0.0174458	1579	Structural
Node1473	BS004835.1	1251	nucleocapsid_phosphoprotein	Mesocricetus auratus	Homo sapiens	Coronaviridae_12	Coronaviridae	TRUE	0.369871	1579	Structural
Node1473	BS004835.1	13125	ORF1a_polyprotein	Mesocricetus auratus	Homo sapiens	Coronaviridae_12	Coronaviridae	TRUE	-0.119051	1579	Replication-associated
Node1473	BS004835.1	21195	ORF1ab_polyprotein	Mesocricetus auratus	Homo sapiens	Coronaviridae_12	Coronaviridae	TRUE	-0.173184	1579	Replication-associated
Node1473	BS004835.1	186	ORF6_protein	Mesocricetus auratus	Homo sapiens	Coronaviridae_12	Coronaviridae	TRUE	-0.123303	1579	Auxiliary
Node1473	BS004835.1	3705	surface_glycoprotein	Mesocricetus auratus	Homo sapiens	Coronaviridae_12	Coronaviridae	TRUE	1.07688	1579	Entry
Node1473	BS004844.1	669	membrane_glycoprotein	Mesocricetus auratus	Homo sapiens	Coronaviridae_12	Coronaviridae	TRUE	-0.318827	1579	Structural
Node1473	BS004844.1	1251	nucleocapsid_phosphoprotein	Mesocricetus auratus	Homo sapiens	Coronaviridae_12	Coronaviridae	TRUE	0.0913551	1579	Structural
Node1473	BS004844.1	13125	ORF1a_polyprotein	Mesocricetus auratus	Homo sapiens	Coronaviridae_12	Coronaviridae	TRUE	-0.0274423	1579	Replication-associated
Node1473	BS004844.1	21195	ORF1ab_polyprotein	Mesocricetus auratus	Homo sapiens	Coronaviridae_12	Coronaviridae	TRUE	-0.0116959	1579	Replication-associated
Node1473	BS004844.1	828	ORF3a_protein	Mesocricetus auratus	Homo sapiens	Coronaviridae_12	Coronaviridae	TRUE	0.0190952	1579	Auxiliary
Node1473	BS004844.1	186	ORF6_protein	Mesocricetus auratus	Homo sapiens	Coronaviridae_12	Coronaviridae	TRUE	-0.429324	1579	Auxiliary
Node1473	BS004844.1	3705	surface_glycoprotein	Mesocricetus auratus	Homo sapiens	Coronaviridae_12	Coronaviridae	TRUE	1.09178	1579	Entry
Node1473	BS005010.1	669	membrane_glycoprotein	Mesocricetus auratus	Homo sapiens	Coronaviridae_12	Coronaviridae	TRUE	-0.0174458	1579	Structural
Node1473	BS005010.1	1251	nucleocapsid_phosphoprotein	Mesocricetus auratus	Homo sapiens	Coronaviridae_12	Coronaviridae	TRUE	0.283157	1579	Structural
Node1473	BS005010.1	13125	ORF1a_polyprotein	Mesocricetus auratus	Homo sapiens	Coronaviridae_12	Coronaviridae	TRUE	0.0518554	1579	Replication-associated
Node1473	BS005010.1	21195	ORF1ab_polyprotein	Mesocricetus auratus	Homo sapiens	Coronaviridae_12	Coronaviridae	TRUE	0.046359	1579	Replication-associated
Node1473	BS005010.1	828	ORF3a_protein	Mesocricetus auratus	Homo sapiens	Coronaviridae_12	Coronaviridae	TRUE	-0.282724	1579	Auxiliary
Node1473	BS005010.1	186	ORF6_protein	Mesocricetus auratus	Homo sapiens	Coronaviridae_12	Coronaviridae	TRUE	-0.123303	1579	Auxiliary
Node1473	BS005010.1	3705	surface_glycoprotein	Mesocricetus auratus	Homo sapiens	Coronaviridae_12	Coronaviridae	TRUE	1.07688	1579	Entry
Node1473	BS005014.1	669	membrane_glycoprotein	Mesocricetus auratus	Homo sapiens	Coronaviridae_12	Coronaviridae	TRUE	0.177258	1579	Structural
Node1473	BS005014.1	1251	nucleocapsid_phosphoprotein	Mesocricetus auratus	Homo sapiens	Coronaviridae_12	Coronaviridae	TRUE	-0.0861628	1579	Structural
Node1473	BS005014.1	13125	ORF1a_polyprotein	Mesocricetus auratus	Homo sapiens	Coronaviridae_12	Coronaviridae	TRUE	-0.409179	1579	Replication-associated
Node1473	BS005014.1	21195	ORF1ab_polyprotein	Mesocricetus auratus	Homo sapiens	Coronaviridae_12	Coronaviridae	TRUE	-0.275635	1579	Replication-associated
Node1473	BS005014.1	828	ORF3a_protein	Mesocricetus auratus	Homo sapiens	Coronaviridae_12	Coronaviridae	TRUE	-0.282724	1579	Auxiliary
Node1473	BS005014.1	3708	surface_glycoprotein	Mesocricetus auratus	Homo sapiens	Coronaviridae_12	Coronaviridae	TRUE	1.08685	1579	Entry
Node1473	BS005590.1	669	membrane_glycoprotein	Mesocricetus auratus	Homo sapiens	Coronaviridae_12	Coronaviridae	TRUE	0.177258	1579	Structural
Node1473	BS005590.1	1251	nucleocapsid_phosphoprotein	Mesocricetus auratus	Homo sapiens	Coronaviridae_12	Coronaviridae	TRUE	-0.0861628	1579	Structural
Node1473	BS005590.1	13125	ORF1a_polyprotein	Mesocricetus auratus	Homo sapiens	Coronaviridae_12	Coronaviridae	TRUE	-0.430248	1579	Replication-associated
Node1473	BS005590.1	21195	ORF1ab_polyprotein	Mesocricetus auratus	Homo sapiens	Coronaviridae_12	Coronaviridae	TRUE	-0.345525	1579	Replication-associated
Node1473	BS005590.1	828	ORF3a_protein	Mesocricetus auratus	Homo sapiens	Coronaviridae_12	Coronaviridae	TRUE	-0.282724	1579	Auxiliary
Node1473	BS005590.1	3708	surface_glycoprotein	Mesocricetus auratus	Homo sapiens	Coronaviridae_12	Coronaviridae	TRUE	1.08685	1579	Entry
Node1473	BS005604.1	1251	nucleocapsid_phosphoprotein	Mesocricetus auratus	Homo sapiens	Coronaviridae_12	Coronaviridae	TRUE	0.368363	1579	Structural
Node1473	BS005604.1	13125	ORF1a_polyprotein	Mesocricetus auratus	Homo sapiens	Coronaviridae_12	Coronaviridae	TRUE	-0.131296	1579	Replication-associated
Node1473	BS005604.1	21195	ORF1ab_polyprotein	Mesocricetus auratus	Homo sapiens	Coronaviridae_12	Coronaviridae	TRUE	-0.0505181	1579	Replication-associated
Node1473	BS005604.1	828	ORF3a_protein	Mesocricetus auratus	Homo sapiens	Coronaviridae_12	Coronaviridae	TRUE	-0.282724	1579	Auxiliary
Node1473	BS005604.1	3708	surface_glycoprotein	Mesocricetus auratus	Homo sapiens	Coronaviridae_12	Coronaviridae	TRUE	1.10319	1579	Entry
Node1473	BS005622.1	669	membrane_glycoprotein	Mesocricetus auratus	Homo sapiens	Coronaviridae_12	Coronaviridae	TRUE	0.177258	1579	Structural
Node1473	BS005622.1	1251	nucleocapsid_phosphoprotein	Mesocricetus auratus	Homo sapiens	Coronaviridae_12	Coronaviridae	TRUE	-0.195074	1579	Structural
Node1473	BS005622.1	13125	ORF1a_polyprotein	Mesocricetus auratus	Homo sapiens	Coronaviridae_12	Coronaviridae	TRUE	-0.411074	1579	Replication-associated
Node1473	BS005622.1	21195	ORF1ab_polyprotein	Mesocricetus auratus	Homo sapiens	Coronaviridae_12	Coronaviridae	TRUE	-0.33249	1579	Replication-associated
Node1473	BS005622.1	828	ORF3a_protein	Mesocricetus auratus	Homo sapiens	Coronaviridae_12	Coronaviridae	TRUE	-0.282724	1579	Auxiliary
Node1473	BS005622.1	3708	surface_glycoprotein	Mesocricetus auratus	Homo sapiens	Coronaviridae_12	Coronaviridae	TRUE	1.10141	1579	Entry
Node1473	BS005632.1	669	membrane_glycoprotein	Mesocricetus auratus	Homo sapiens	Coronaviridae_12	Coronaviridae	TRUE	0.177866	1579	Structural
Node1473	BS005632.1	1251	nucleocapsid_phosphoprotein	Mesocricetus auratus	Homo sapiens	Coronaviridae_12	Coronaviridae	TRUE	-0.0176187	1579	Structural
Node1473	BS005632.1	13125	ORF1a_polyprotein	Mesocricetus auratus	Homo sapiens	Coronaviridae_12	Coronaviridae	TRUE	-0.298386	1579	Replication-associated
Node1473	BS005632.1	21195	ORF1ab_polyprotein	Mesocricetus auratus	Homo sapiens	Coronaviridae_12	Coronaviridae	TRUE	-0.12343	1579	Replication-associated
Node1473	BS005632.1	828	ORF3a_protein	Mesocricetus auratus	Homo sapiens	Coronaviridae_12	Coronaviridae	TRUE	-0.282724	1579	Auxiliary
Node1473	BS005632.1	3708	surface_glycoprotein	Mesocricetus auratus	Homo sapiens	Coronaviridae_12	Coronaviridae	TRUE	1.08685	1579	Entry
Node1473	BS006003.1	669	membrane_glycoprotein	Mesocricetus auratus	Homo sapiens	Coronaviridae_12	Coronaviridae	TRUE	0.177258	1579	Structural
Node1473	BS006003.1	1251	nucleocapsid_phosphoprotein	Mesocricetus auratus	Homo sapiens	Coronaviridae_12	Coronaviridae	TRUE	0.159111	1579	Structural
Node1473	BS006003.1	13125	ORF1a_polyprotein	Mesocricetus auratus	Homo sapiens	Coronaviridae_12	Coronaviridae	TRUE	-0.360336	1579	Replication-associated
Node1473	BS006003.1	21195	ORF1ab_polyprotein	Mesocricetus auratus	Homo sapiens	Coronaviridae_12	Coronaviridae	TRUE	-0.248792	1579	Replication-associated
Node1473	BS006003.1	828	ORF3a_protein	Mesocricetus auratus	Homo sapiens	Coronaviridae_12	Coronaviridae	TRUE	-0.282724	1579	Auxiliary
Node1473	BS006003.1	3708	surface_glycoprotein	Mesocricetus auratus	Homo sapiens	Coronaviridae_12	Coronaviridae	TRUE	1.11983	1579	Entry
Node1473	BS006170.1	669	membrane_glycoprotein	Mesocricetus auratus	Homo sapiens	Coronaviridae_12	Coronaviridae	TRUE	0.177866	1579	Structural
Node1473	BS006170.1	1251	nucleocapsid_phosphoprotein	Mesocricetus auratus	Homo sapiens	Coronaviridae_12	Coronaviridae	TRUE	0.140376	1579	Structural
Node1473	BS006170.1	13125	ORF1a_polyprotein	Mesocricetus auratus	Homo sapiens	Coronaviridae_12	Coronaviridae	TRUE	-0.162488	1579	Replication-associated
Node1473	BS006170.1	21195	ORF1ab_polyprotein	Mesocricetus auratus	Homo sapiens	Coronaviridae_12	Coronaviridae	TRUE	-0.134941	1579	Replication-associated
Node1473	BS006170.1	828	ORF3a_protein	Mesocricetus auratus	Homo sapiens	Coronaviridae_12	Coronaviridae	TRUE	-0.92202	1579	Auxiliary
Node1473	BS006170.1	3708	surface_glycoprotein	Mesocricetus auratus	Homo sapiens	Coronaviridae_12	Coronaviridae	TRUE	1.10124	1579	Entry
Node1473	BS006265.1	669	membrane_glycoprotein	Mesocricetus auratus	Homo sapiens	Coronaviridae_12	Coronaviridae	TRUE	0.177866	1579	Structural
Node1473	BS006265.1	1251	nucleocapsid_phosphoprotein	Mesocricetus auratus	Homo sapiens	Coronaviridae_12	Coronaviridae	TRUE	-0.195074	1579	Structural
Node1473	BS006265.1	13125	ORF1a_polyprotein	Mesocricetus auratus	Homo sapiens	Coronaviridae_12	Coronaviridae	TRUE	-0.411612	1579	Replication-associated
Node1473	BS006265.1	21195	ORF1ab_polyprotein	Mesocricetus auratus	Homo sapiens	Coronaviridae_12	Coronaviridae	TRUE	-0.25995	1579	Replication-associated
Node1473	BS006265.1	828	ORF3a_protein	Mesocricetus auratus	Homo sapiens	Coronaviridae_12	Coronaviridae	TRUE	-0.282724	1579	Auxiliary
Node1473	BS006265.1	3708	surface_glycoprotein	Mesocricetus auratus	Homo sapiens	Coronaviridae_12	Coronaviridae	TRUE	1.08685	1579	Entry
Node1473	BS006347.1	669	membrane_glycoprotein	Mesocricetus auratus	Homo sapiens	Coronaviridae_12	Coronaviridae	TRUE	0.177866	1579	Structural
Node1473	BS006347.1	1251	nucleocapsid_phosphoprotein	Mesocricetus auratus	Homo sapiens	Coronaviridae_12	Coronaviridae	TRUE	-0.0176187	1579	Structural
Node1473	BS006347.1	13125	ORF1a_polyprotein	Mesocricetus auratus	Homo sapiens	Coronaviridae_12	Coronaviridae	TRUE	-0.498916	1579	Replication-associated
Node1473	BS006347.1	21195	ORF1ab_polyprotein	Mesocricetus auratus	Homo sapiens	Coronaviridae_12	Coronaviridae	TRUE	-0.397418	1579	Replication-associated
Node1473	BS006347.1	828	ORF3a_protein	Mesocricetus auratus	Homo sapiens	Coronaviridae_12	Coronaviridae	TRUE	-0.282724	1579	Auxiliary
Node1473	BS006347.1	3708	surface_glycoprotein	Mesocricetus auratus	Homo sapiens	Coronaviridae_12	Coronaviridae	TRUE	1.08685	1579	Entry
Node1473	BS006533.1	669	membrane_glycoprotein	Mesocricetus auratus	Homo sapiens	Coronaviridae_12	Coronaviridae	TRUE	0.177258	1579	Structural
Node1473	BS006533.1	1251	nucleocapsid_phosphoprotein	Mesocricetus auratus	Homo sapiens	Coronaviridae_12	Coronaviridae	TRUE	0.159111	1579	Structural
Node1473	BS006533.1	13125	ORF1a_polyprotein	Mesocricetus auratus	Homo sapiens	Coronaviridae_12	Coronaviridae	TRUE	-0.349658	1579	Replication-associated
Node1473	BS006533.1	21195	ORF1ab_polyprotein	Mesocricetus auratus	Homo sapiens	Coronaviridae_12	Coronaviridae	TRUE	-0.250786	1579	Replication-associated
Node1473	BS006533.1	828	ORF3a_protein	Mesocricetus auratus	Homo sapiens	Coronaviridae_12	Coronaviridae	TRUE	-0.282724	1579	Auxiliary
Node1473	BS006533.1	360	ORF8_protein	Mesocricetus auratus	Homo sapiens	Coronaviridae_12	Coronaviridae	TRUE	-0.395146	1579	Auxiliary
Node1473	BS006533.1	3708	surface_glycoprotein	Mesocricetus auratus	Homo sapiens	Coronaviridae_12	Coronaviridae	TRUE	1.08685	1579	Entry
Node1473	BS006558.1	669	membrane_glycoprotein	Mesocricetus auratus	Homo sapiens	Coronaviridae_12	Coronaviridae	TRUE	0.177258	1579	Structural
Node1473	BS006558.1	1251	nucleocapsid_phosphoprotein	Mesocricetus auratus	Homo sapiens	Coronaviridae_12	Coronaviridae	TRUE	-0.195074	1579	Structural
Node1473	BS006558.1	13125	ORF1a_polyprotein	Mesocricetus auratus	Homo sapiens	Coronaviridae_12	Coronaviridae	TRUE	-0.308615	1579	Replication-associated
Node1473	BS006558.1	21195	ORF1ab_polyprotein	Mesocricetus auratus	Homo sapiens	Coronaviridae_12	Coronaviridae	TRUE	-0.328204	1579	Replication-associated
Node1473	BS006558.1	828	ORF3a_protein	Mesocricetus auratus	Homo sapiens	Coronaviridae_12	Coronaviridae	TRUE	-0.282724	1579	Auxiliary
Node1473	BS006558.1	3708	surface_glycoprotein	Mesocricetus auratus	Homo sapiens	Coronaviridae_12	Coronaviridae	TRUE	1.1334	1579	Entry
Node1473	BS006672.1	669	membrane_glycoprotein	Mesocricetus auratus	Homo sapiens	Coronaviridae_12	Coronaviridae	TRUE	0.177258	1579	Structural
Node1473	BS006672.1	1251	nucleocapsid_phosphoprotein	Mesocricetus auratus	Homo sapiens	Coronaviridae_12	Coronaviridae	TRUE	-0.321637	1579	Structural
Node1473	BS006672.1	13125	ORF1a_polyprotein	Mesocricetus auratus	Homo sapiens	Coronaviridae_12	Coronaviridae	TRUE	-0.348662	1579	Replication-associated
Node1473	BS006672.1	21195	ORF1ab_polyprotein	Mesocricetus auratus	Homo sapiens	Coronaviridae_12	Coronaviridae	TRUE	-0.297234	1579	Replication-associated
Node1473	BS006672.1	828	ORF3a_protein	Mesocricetus auratus	Homo sapiens	Coronaviridae_12	Coronaviridae	TRUE	0.0191246	1579	Auxiliary
Node1473	BS006672.1	3708	surface_glycoprotein	Mesocricetus auratus	Homo sapiens	Coronaviridae_12	Coronaviridae	TRUE	0.63885	1579	Entry
Node1473	BS006850.1	669	membrane_glycoprotein	Mesocricetus auratus	Homo sapiens	Coronaviridae_12	Coronaviridae	TRUE	0.177258	1579	Structural
Node1473	BS006850.1	1251	nucleocapsid_phosphoprotein	Mesocricetus auratus	Homo sapiens	Coronaviridae_12	Coronaviridae	TRUE	-0.195074	1579	Structural
Node1473	BS006850.1	13125	ORF1a_polyprotein	Mesocricetus auratus	Homo sapiens	Coronaviridae_12	Coronaviridae	TRUE	-0.411074	1579	Replication-associated
Node1473	BS006850.1	21195	ORF1ab_polyprotein	Mesocricetus auratus	Homo sapiens	Coronaviridae_12	Coronaviridae	TRUE	-0.397815	1579	Replication-associated
Node1473	BS006850.1	828	ORF3a_protein	Mesocricetus auratus	Homo sapiens	Coronaviridae_12	Coronaviridae	TRUE	-0.282724	1579	Auxiliary
Node1473	BS006850.1	3708	surface_glycoprotein	Mesocricetus auratus	Homo sapiens	Coronaviridae_12	Coronaviridae	TRUE	0.797629	1579	Entry
Node1473	BS006924.1	669	membrane_glycoprotein	Mesocricetus auratus	Homo sapiens	Coronaviridae_12	Coronaviridae	TRUE	0.177258	1579	Structural
Node1473	BS006924.1	1251	nucleocapsid_phosphoprotein	Mesocricetus auratus	Homo sapiens	Coronaviridae_12	Coronaviridae	TRUE	0.284799	1579	Structural
Node1473	BS006924.1	13125	ORF1a_polyprotein	Mesocricetus auratus	Homo sapiens	Coronaviridae_12	Coronaviridae	TRUE	-0.293048	1579	Replication-associated
Node1473	BS006924.1	21195	ORF1ab_polyprotein	Mesocricetus auratus	Homo sapiens	Coronaviridae_12	Coronaviridae	TRUE	-0.200674	1579	Replication-associated
Node1473	BS006924.1	828	ORF3a_protein	Mesocricetus auratus	Homo sapiens	Coronaviridae_12	Coronaviridae	TRUE	-0.282724	1579	Auxiliary
Node1473	BS006924.1	3708	surface_glycoprotein	Mesocricetus auratus	Homo sapiens	Coronaviridae_12	Coronaviridae	TRUE	0.78164	1579	Entry
Node1473	BS007182.1	1251	nucleocapsid_phosphoprotein	Mesocricetus auratus	Homo sapiens	Coronaviridae_12	Coronaviridae	TRUE	-0.0197903	1579	Structural
Node1473	BS007182.1	13125	ORF1a_polyprotein	Mesocricetus auratus	Homo sapiens	Coronaviridae_12	Coronaviridae	TRUE	-0.363498	1579	Replication-associated
Node1473	BS007182.1	21195	ORF1ab_polyprotein	Mesocricetus auratus	Homo sapiens	Coronaviridae_12	Coronaviridae	TRUE	-0.265209	1579	Replication-associated
Node1473	BS007182.1	828	ORF3a_protein	Mesocricetus auratus	Homo sapiens	Coronaviridae_12	Coronaviridae	TRUE	-0.282724	1579	Auxiliary
Node1473	BS007182.1	3708	surface_glycoprotein	Mesocricetus auratus	Homo sapiens	Coronaviridae_12	Coronaviridae	TRUE	1.11601	1579	Entry
Node1473	BS007230.1	669	membrane_glycoprotein	Mesocricetus auratus	Homo sapiens	Coronaviridae_12	Coronaviridae	TRUE	0.177258	1579	Structural
Node1473	BS007230.1	1251	nucleocapsid_phosphoprotein	Mesocricetus auratus	Homo sapiens	Coronaviridae_12	Coronaviridae	TRUE	0.159111	1579	Structural
Node1473	BS007230.1	13125	ORF1a_polyprotein	Mesocricetus auratus	Homo sapiens	Coronaviridae_12	Coronaviridae	TRUE	-0.203787	1579	Replication-associated
Node1473	BS007230.1	21195	ORF1ab_polyprotein	Mesocricetus auratus	Homo sapiens	Coronaviridae_12	Coronaviridae	TRUE	-0.188017	1579	Replication-associated
Node1473	BS007230.1	828	ORF3a_protein	Mesocricetus auratus	Homo sapiens	Coronaviridae_12	Coronaviridae	TRUE	-0.282724	1579	Auxiliary
Node1473	BS007230.1	3708	surface_glycoprotein	Mesocricetus auratus	Homo sapiens	Coronaviridae_12	Coronaviridae	TRUE	0.814447	1579	Entry
Node1473	BS007365.1	669	membrane_glycoprotein	Mesocricetus auratus	Homo sapiens	Coronaviridae_12	Coronaviridae	TRUE	0.177258	1579	Structural
Node1473	BS007365.1	1251	nucleocapsid_phosphoprotein	Mesocricetus auratus	Homo sapiens	Coronaviridae_12	Coronaviridae	TRUE	0.140131	1579	Structural
Node1473	BS007365.1	13125	ORF1a_polyprotein	Mesocricetus auratus	Homo sapiens	Coronaviridae_12	Coronaviridae	TRUE	-0.24719	1579	Replication-associated
Node1473	BS007365.1	21195	ORF1ab_polyprotein	Mesocricetus auratus	Homo sapiens	Coronaviridae_12	Coronaviridae	TRUE	-0.193924	1579	Replication-associated
Node1473	BS007365.1	828	ORF3a_protein	Mesocricetus auratus	Homo sapiens	Coronaviridae_12	Coronaviridae	TRUE	-0.282724	1579	Auxiliary
Node1473	BS007365.1	3708	surface_glycoprotein	Mesocricetus auratus	Homo sapiens	Coronaviridae_12	Coronaviridae	TRUE	0.638602	1579	Entry
Node1473	LC547532.1	1248	nucleocapsid_phosphoprotein	Mesocricetus auratus	Homo sapiens	Coronaviridae_12	Coronaviridae	TRUE	-0.018623	1579	Structural
Node1473	LC650857.1	1248	nucleocapsid_phosphoprotein	Mesocricetus auratus	Homo sapiens	Coronaviridae_12	Coronaviridae	TRUE	0.0455105	1579	Structural
Node1473	LC650857.1	13125	ORF1a_polyprotein	Mesocricetus auratus	Homo sapiens	Coronaviridae_12	Coronaviridae	TRUE	-0.0250512	1579	Replication-associated
Node1473	LC650857.1	21195	ORF1ab_polyprotein	Mesocricetus auratus	Homo sapiens	Coronaviridae_12	Coronaviridae	TRUE	-0.360463	1579	Replication-associated
Node1473	LC650860.1	1248	nucleocapsid_phosphoprotein	Mesocricetus auratus	Homo sapiens	Coronaviridae_12	Coronaviridae	TRUE	-0.0232653	1579	Structural
Node1473	LC650860.1	13125	ORF1a_polyprotein	Mesocricetus auratus	Homo sapiens	Coronaviridae_12	Coronaviridae	TRUE	-0.307227	1579	Replication-associated
Node1473	LC650860.1	21195	ORF1ab_polyprotein	Mesocricetus auratus	Homo sapiens	Coronaviridae_12	Coronaviridae	TRUE	-0.39377	1579	Replication-associated
Node1473	LC654317.1	13125	ORF1a_polyprotein	Mesocricetus auratus	Homo sapiens	Coronaviridae_12	Coronaviridae	TRUE	0.128202	1579	Replication-associated
Node1473	LC654317.1	21195	ORF1ab_polyprotein	Mesocricetus auratus	Homo sapiens	Coronaviridae_12	Coronaviridae	TRUE	0.350272	1579	Replication-associated
Node1473	LC654327.1	1248	nucleocapsid_phosphoprotein	Mesocricetus auratus	Homo sapiens	Coronaviridae_12	Coronaviridae	TRUE	0.283034	1579	Structural
Node1473	LC654327.1	21195	ORF1ab_polyprotein	Mesocricetus auratus	Homo sapiens	Coronaviridae_12	Coronaviridae	TRUE	-0.487863	1579	Replication-associated
Node1473	LC655320.1	1248	nucleocapsid_phosphoprotein	Mesocricetus auratus	Homo sapiens	Coronaviridae_12	Coronaviridae	TRUE	0.138991	1579	Structural
Node1473	LC655320.1	21195	ORF1ab_polyprotein	Mesocricetus auratus	Homo sapiens	Coronaviridae_12	Coronaviridae	TRUE	-0.270601	1579	Replication-associated
Node1473	LC655327.1	1248	nucleocapsid_phosphoprotein	Mesocricetus auratus	Homo sapiens	Coronaviridae_12	Coronaviridae	TRUE	0.17601	1579	Structural
Node1473	LC655327.1	13125	ORF1a_polyprotein	Mesocricetus auratus	Homo sapiens	Coronaviridae_12	Coronaviridae	TRUE	-0.271522	1579	Replication-associated
Node1473	LC655327.1	21195	ORF1ab_polyprotein	Mesocricetus auratus	Homo sapiens	Coronaviridae_12	Coronaviridae	TRUE	0.127486	1579	Replication-associated
Node1473	LC655333.1	1248	nucleocapsid_phosphoprotein	Mesocricetus auratus	Homo sapiens	Coronaviridae_12	Coronaviridae	TRUE	0.17601	1579	Structural
Node1473	LC655333.1	13125	ORF1a_polyprotein	Mesocricetus auratus	Homo sapiens	Coronaviridae_12	Coronaviridae	TRUE	-0.146642	1579	Replication-associated
Node1473	LC655333.1	21195	ORF1ab_polyprotein	Mesocricetus auratus	Homo sapiens	Coronaviridae_12	Coronaviridae	TRUE	0.0305056	1579	Replication-associated
Node1473	LC671433.1	1248	nucleocapsid_phosphoprotein	Mesocricetus auratus	Homo sapiens	Coronaviridae_12	Coronaviridae	TRUE	-0.164125	1579	Structural
Node1473	LC671433.1	21195	ORF1ab_polyprotein	Mesocricetus auratus	Homo sapiens	Coronaviridae_12	Coronaviridae	TRUE	-0.171704	1579	Replication-associated
Node1473	LC671433.1	3702	surface_glycoprotein	Mesocricetus auratus	Homo sapiens	Coronaviridae_12	Coronaviridae	TRUE	-0.325584	1579	Entry
Node1473	LC741432.1	408	membrane_glycoprotein	Mesocricetus auratus	Homo sapiens	Coronaviridae_12	Coronaviridae	TRUE	-0.0318448	1579	Structural
Node1473	LC741432.1	1251	nucleocapsid_phosphoprotein	Mesocricetus auratus	Homo sapiens	Coronaviridae_12	Coronaviridae	TRUE	0.283157	1579	Structural
Node1473	LC741432.1	13116	ORF1a_polyprotein	Mesocricetus auratus	Homo sapiens	Coronaviridae_12	Coronaviridae	TRUE	-0.18607	1579	Replication-associated
Node1473	LC741432.1	21183	ORF1ab_polyprotein	Mesocricetus auratus	Homo sapiens	Coronaviridae_12	Coronaviridae	TRUE	-0.209373	1579	Replication-associated
Node1473	LC741432.1	828	ORF3a_protein	Mesocricetus auratus	Homo sapiens	Coronaviridae_12	Coronaviridae	TRUE	0.0190952	1579	Auxiliary
Node1473	LC741432.1	174	ORF6_protein	Mesocricetus auratus	Homo sapiens	Coronaviridae_12	Coronaviridae	TRUE	-0.423717	1579	Auxiliary
Node1473	LC741432.1	3702	surface_glycoprotein	Mesocricetus auratus	Homo sapiens	Coronaviridae_12	Coronaviridae	TRUE	1.07208	1579	Entry
Node1473	LC745983.1	669	membrane_glycoprotein	Mesocricetus auratus	Homo sapiens	Coronaviridae_12	Coronaviridae	TRUE	0.177258	1579	Structural
Node1473	LC745983.1	1248	nucleocapsid_phosphoprotein	Mesocricetus auratus	Homo sapiens	Coronaviridae_12	Coronaviridae	TRUE	-0.0198087	1579	Structural
Node1473	LC745983.1	7782	ORF1ab_polyprotein	Mesocricetus auratus	Homo sapiens	Coronaviridae_12	Coronaviridae	TRUE	-0.268851	1579	Replication-associated
Node1473	LC745983.1	828	ORF3a_protein	Mesocricetus auratus	Homo sapiens	Coronaviridae_12	Coronaviridae	TRUE	0.0190952	1579	Auxiliary
Node1473	LC745983.1	3708	surface_glycoprotein	Mesocricetus auratus	Homo sapiens	Coronaviridae_12	Coronaviridae	TRUE	0.620392	1579	Entry
Node1473	LC752089.1	1248	nucleocapsid_phosphoprotein	Mesocricetus auratus	Homo sapiens	Coronaviridae_12	Coronaviridae	TRUE	0.254101	1579	Structural
Node1473	LC752089.1	13125	ORF1a_polyprotein	Mesocricetus auratus	Homo sapiens	Coronaviridae_12	Coronaviridae	TRUE	0.128206	1579	Replication-associated
Node1473	LC752089.1	21195	ORF1ab_polyprotein	Mesocricetus auratus	Homo sapiens	Coronaviridae_12	Coronaviridae	TRUE	0.350274	1579	Replication-associated
Node1473	LC773212.1	669	membrane_glycoprotein	Mesocricetus auratus	Homo sapiens	Coronaviridae_12	Coronaviridae	TRUE	-0.0174458	1579	Structural
Node1473	LC773212.1	1251	nucleocapsid_phosphoprotein	Mesocricetus auratus	Homo sapiens	Coronaviridae_12	Coronaviridae	TRUE	-0.324609	1579	Structural
Node1473	LC773212.1	13125	ORF1a_polyprotein	Mesocricetus auratus	Homo sapiens	Coronaviridae_12	Coronaviridae	TRUE	-0.215472	1579	Replication-associated
Node1473	LC773212.1	21195	ORF1ab_polyprotein	Mesocricetus auratus	Homo sapiens	Coronaviridae_12	Coronaviridae	TRUE	-0.227596	1579	Replication-associated
Node1473	LC773212.1	828	ORF3a_protein	Mesocricetus auratus	Homo sapiens	Coronaviridae_12	Coronaviridae	TRUE	-0.336606	1579	Auxiliary
Node1473	LC773212.1	186	ORF6_protein	Mesocricetus auratus	Homo sapiens	Coronaviridae_12	Coronaviridae	TRUE	-0.429324	1579	Auxiliary
Node1473	LC773212.1	132	ORF7b	Mesocricetus auratus	Homo sapiens	Coronaviridae_12	Coronaviridae	TRUE	-0.405841	1579	Auxiliary
Node1473	LC773238.1	669	membrane_glycoprotein	Mesocricetus auratus	Homo sapiens	Coronaviridae_12	Coronaviridae	TRUE	0.177258	1579	Structural
Node1473	LC773238.1	1251	nucleocapsid_phosphoprotein	Mesocricetus auratus	Homo sapiens	Coronaviridae_12	Coronaviridae	TRUE	-0.195074	1579	Structural
Node1473	LC773238.1	13038	ORF1a_polyprotein	Mesocricetus auratus	Homo sapiens	Coronaviridae_12	Coronaviridae	TRUE	-0.488123	1579	Replication-associated
Node1473	LC773238.1	21108	ORF1ab_polyprotein	Mesocricetus auratus	Homo sapiens	Coronaviridae_12	Coronaviridae	TRUE	-0.483953	1579	Replication-associated
Node1473	LC773238.1	828	ORF3a_protein	Mesocricetus auratus	Homo sapiens	Coronaviridae_12	Coronaviridae	TRUE	-0.282724	1579	Auxiliary
Node1473	LC773238.1	3708	surface_glycoprotein	Mesocricetus auratus	Homo sapiens	Coronaviridae_12	Coronaviridae	TRUE	1.11983	1579	Entry
Node1473	MT459836.1	1248	nucleocapsid_phosphoprotein	Mesocricetus auratus	Homo sapiens	Coronaviridae_12	Coronaviridae	TRUE	-0.321566	1579	Structural
Node1473	MT459887.1	1248	nucleocapsid_phosphoprotein	Mesocricetus auratus	Homo sapiens	Coronaviridae_12	Coronaviridae	TRUE	-0.018623	1579	Structural
Node1473	MT509958.1	1248	nucleocapsid_phosphoprotein	Mesocricetus auratus	Homo sapiens	Coronaviridae_12	Coronaviridae	TRUE	-0.018623	1579	Structural
Node1473	MT576529.1	3702	surface_glycoprotein	Mesocricetus auratus	Homo sapiens	Coronaviridae_12	Coronaviridae	TRUE	-0.388019	1579	Entry
Node1473	MT576529.1	21195	truncated_ORF1ab_polyprotein	Mesocricetus auratus	Homo sapiens	Coronaviridae_12	Coronaviridae	TRUE	-0.747879	1579	Replication-associated
Node1473	MT664106.1	1248	nucleocapsid_phosphoprotein	Mesocricetus auratus	Homo sapiens	Coronaviridae_12	Coronaviridae	TRUE	-0.018623	1579	Structural
Node1473	MT664106.1	13125	ORF1a_polyprotein	Mesocricetus auratus	Homo sapiens	Coronaviridae_12	Coronaviridae	TRUE	-0.399578	1579	Replication-associated
Node1473	MT664106.1	21195	ORF1ab_polyprotein	Mesocricetus auratus	Homo sapiens	Coronaviridae_12	Coronaviridae	TRUE	-0.108995	1579	Replication-associated
Node1473	MT731666.1	13125	ORF1a_polyprotein	Mesocricetus auratus	Homo sapiens	Coronaviridae_12	Coronaviridae	TRUE	-0.388915	1579	Replication-associated
Node1473	MT731666.1	21195	ORF1ab_polyprotein	Mesocricetus auratus	Homo sapiens	Coronaviridae_12	Coronaviridae	TRUE	-0.201437	1579	Replication-associated
Node1473	MT731666.1	3702	surface_glycoprotein	Mesocricetus auratus	Homo sapiens	Coronaviridae_12	Coronaviridae	TRUE	-0.388309	1579	Entry
Node1473	MT731738.1	21195	ORF1ab_polyprotein	Mesocricetus auratus	Homo sapiens	Coronaviridae_12	Coronaviridae	TRUE	-0.91677	1579	Replication-associated
Node1473	MT731738.1	828	ORF3a_protein	Mesocricetus auratus	Homo sapiens	Coronaviridae_12	Coronaviridae	TRUE	-0.758469	1579	Auxiliary
Node1473	MT738101.1	1248	nucleocapsid_phosphoprotein	Mesocricetus auratus	Homo sapiens	Coronaviridae_12	Coronaviridae	TRUE	0.176062	1579	Structural
Node1473	MT738101.1	13125	ORF1a_polyprotein	Mesocricetus auratus	Homo sapiens	Coronaviridae_12	Coronaviridae	TRUE	-0.271543	1579	Replication-associated
Node1473	MT738101.1	21195	ORF1ab_polyprotein	Mesocricetus auratus	Homo sapiens	Coronaviridae_12	Coronaviridae	TRUE	0.0305032	1579	Replication-associated
Node1473	MT748758.1	21180	ORF1ab_polyprotein	Mesocricetus auratus	Homo sapiens	Coronaviridae_12	Coronaviridae	TRUE	0.206738	1579	Replication-associated
Node1473	MT775826.1	1248	nucleocapsid_phosphoprotein	Mesocricetus auratus	Homo sapiens	Coronaviridae_12	Coronaviridae	TRUE	-0.018623	1579	Structural
Node1473	MT775826.1	13125	ORF1a_polyprotein	Mesocricetus auratus	Homo sapiens	Coronaviridae_12	Coronaviridae	TRUE	-0.572603	1579	Replication-associated
Node1473	MT775826.1	21195	ORF1ab_polyprotein	Mesocricetus auratus	Homo sapiens	Coronaviridae_12	Coronaviridae	TRUE	-0.270548	1579	Replication-associated
Node1473	MT798592.1	21195	ORF1ab_polyprotein	Mesocricetus auratus	Homo sapiens	Coronaviridae_12	Coronaviridae	TRUE	-0.57161	1579	Replication-associated
Node1473	MT801002.1	21162	ORF1ab_polyprotein	Mesocricetus auratus	Homo sapiens	Coronaviridae_12	Coronaviridae	TRUE	0.0304598	1579	Replication-associated
Node1473	MT818579.1	1248	nucleocapsid_phosphoprotein	Mesocricetus auratus	Homo sapiens	Coronaviridae_12	Coronaviridae	TRUE	-0.018623	1579	Structural
Node1473	MT818579.1	13125	ORF1a_polyprotein	Mesocricetus auratus	Homo sapiens	Coronaviridae_12	Coronaviridae	TRUE	0.30426	1579	Replication-associated
Node1473	MT818579.1	21195	ORF1ab_polyprotein	Mesocricetus auratus	Homo sapiens	Coronaviridae_12	Coronaviridae	TRUE	0.106082	1579	Replication-associated
Node1473	MT820464.1	21195	ORF1ab_polyprotein	Mesocricetus auratus	Homo sapiens	Coronaviridae_12	Coronaviridae	TRUE	-0.270558	1579	Replication-associated
Node1473	MT856456.1	1248	nucleocapsid_phosphoprotein	Mesocricetus auratus	Homo sapiens	Coronaviridae_12	Coronaviridae	TRUE	-0.018623	1579	Structural
Node1473	MT856456.1	13125	ORF1a_polyprotein	Mesocricetus auratus	Homo sapiens	Coronaviridae_12	Coronaviridae	TRUE	0.00320318	1579	Replication-associated
Node1473	MT856456.1	21195	ORF1ab_polyprotein	Mesocricetus auratus	Homo sapiens	Coronaviridae_12	Coronaviridae	TRUE	0.106162	1579	Replication-associated
Node1473	MT856459.1	1248	nucleocapsid_phosphoprotein	Mesocricetus auratus	Homo sapiens	Coronaviridae_12	Coronaviridae	TRUE	0.17601	1579	Structural
Node1473	MT856459.1	21195	ORF1ab_polyprotein	Mesocricetus auratus	Homo sapiens	Coronaviridae_12	Coronaviridae	TRUE	-0.02502	1579	Replication-associated
Node1473	MT876598.1	1248	nucleocapsid_phosphoprotein	Mesocricetus auratus	Homo sapiens	Coronaviridae_12	Coronaviridae	TRUE	-0.018623	1579	Structural
Node1473	MT913008.1	1248	nucleocapsid_phosphoprotein	Mesocricetus auratus	Homo sapiens	Coronaviridae_12	Coronaviridae	TRUE	-0.018623	1579	Structural
Node1473	MT913008.1	13125	ORF1a_polyprotein	Mesocricetus auratus	Homo sapiens	Coronaviridae_12	Coronaviridae	TRUE	-0.388591	1579	Replication-associated
Node1473	MT913008.1	21195	ORF1ab_polyprotein	Mesocricetus auratus	Homo sapiens	Coronaviridae_12	Coronaviridae	TRUE	-0.0249773	1579	Replication-associated
Node1473	MW012271.1	1248	nucleocapsid_phosphoprotein	Mesocricetus auratus	Homo sapiens	Coronaviridae_12	Coronaviridae	TRUE	-0.31941	1579	Structural
Node1473	MW012271.1	21192	ORF1ab_polyprotein	Mesocricetus auratus	Homo sapiens	Coronaviridae_12	Coronaviridae	TRUE	-0.270615	1579	Replication-associated
Node1473	MW030216.1	21195	ORF1ab_polyprotein	Mesocricetus auratus	Homo sapiens	Coronaviridae_12	Coronaviridae	TRUE	-0.270558	1579	Replication-associated
Node1473	MW030233.1	1245	nucleocapsid_phosphoprotein	Mesocricetus auratus	Homo sapiens	Coronaviridae_12	Coronaviridae	TRUE	-0.0186435	1579	Structural
Node1473	MW030233.1	13074	ORF1a_polyprotein	Mesocricetus auratus	Homo sapiens	Coronaviridae_12	Coronaviridae	TRUE	-0.271575	1579	Replication-associated
Node1473	MW030233.1	21141	ORF1ab_polyprotein	Mesocricetus auratus	Homo sapiens	Coronaviridae_12	Coronaviridae	TRUE	-0.0944722	1579	Replication-associated
Node1473	MW079419.1	1248	nucleocapsid_phosphoprotein	Mesocricetus auratus	Homo sapiens	Coronaviridae_12	Coronaviridae	TRUE	0.0355581	1579	Structural
Node1473	MW079419.1	13125	ORF1a_polyprotein	Mesocricetus auratus	Homo sapiens	Coronaviridae_12	Coronaviridae	TRUE	-0.689799	1579	Replication-associated
Node1473	MW079419.1	21195	ORF1ab_polyprotein	Mesocricetus auratus	Homo sapiens	Coronaviridae_12	Coronaviridae	TRUE	-0.302723	1579	Replication-associated
Node1473	MW079421.1	1248	nucleocapsid_phosphoprotein	Mesocricetus auratus	Homo sapiens	Coronaviridae_12	Coronaviridae	TRUE	-0.266015	1579	Structural
Node1473	MW079421.1	13125	ORF1a_polyprotein	Mesocricetus auratus	Homo sapiens	Coronaviridae_12	Coronaviridae	TRUE	-1.02896	1579	Replication-associated
Node1473	MW079421.1	21195	ORF1ab_polyprotein	Mesocricetus auratus	Homo sapiens	Coronaviridae_12	Coronaviridae	TRUE	-0.404071	1579	Replication-associated
Node1473	MW079421.1	828	ORF3a_protein	Mesocricetus auratus	Homo sapiens	Coronaviridae_12	Coronaviridae	TRUE	-0.39538	1579	Auxiliary
Node1473	MW153074.1	1248	nucleocapsid_phosphoprotein	Mesocricetus auratus	Homo sapiens	Coronaviridae_12	Coronaviridae	TRUE	0.176756	1579	Structural
Node1473	MW153074.1	13077	ORF1a_polyprotein	Mesocricetus auratus	Homo sapiens	Coronaviridae_12	Coronaviridae	TRUE	-0.0249127	1579	Replication-associated
Node1473	MW153074.1	21144	ORF1ab_polyprotein	Mesocricetus auratus	Homo sapiens	Coronaviridae_12	Coronaviridae	TRUE	-0.47558	1579	Replication-associated
Node1473	MW153074.1	3702	surface_glycoprotein	Mesocricetus auratus	Homo sapiens	Coronaviridae_12	Coronaviridae	TRUE	-0.269603	1579	Entry
Node1473	MW154165.1	1248	nucleocapsid_phosphoprotein	Mesocricetus auratus	Homo sapiens	Coronaviridae_12	Coronaviridae	TRUE	0.175957	1579	Structural
Node1473	MW154165.1	13125	ORF1a_polyprotein	Mesocricetus auratus	Homo sapiens	Coronaviridae_12	Coronaviridae	TRUE	-0.388651	1579	Replication-associated
Node1473	MW154165.1	21195	ORF1ab_polyprotein	Mesocricetus auratus	Homo sapiens	Coronaviridae_12	Coronaviridae	TRUE	-0.671146	1579	Replication-associated
Node1473	MW154165.1	3702	surface_glycoprotein	Mesocricetus auratus	Homo sapiens	Coronaviridae_12	Coronaviridae	TRUE	-0.269603	1579	Entry
Node1473	MW181744.1	1248	nucleocapsid_phosphoprotein	Mesocricetus auratus	Homo sapiens	Coronaviridae_12	Coronaviridae	TRUE	-0.164271	1579	Structural
Node1473	MW181744.1	21180	ORF1ab_polyprotein	Mesocricetus auratus	Homo sapiens	Coronaviridae_12	Coronaviridae	TRUE	-0.094404	1579	Replication-associated
Node1473	MW183956.1	1248	nucleocapsid_phosphoprotein	Mesocricetus auratus	Homo sapiens	Coronaviridae_12	Coronaviridae	TRUE	-0.018623	1579	Structural
Node1473	MW183956.1	13125	ORF1a_polyprotein	Mesocricetus auratus	Homo sapiens	Coronaviridae_12	Coronaviridae	TRUE	-0.0251456	1579	Replication-associated
Node1473	MW183956.1	21195	ORF1ab_polyprotein	Mesocricetus auratus	Homo sapiens	Coronaviridae_12	Coronaviridae	TRUE	-0.564252	1579	Replication-associated
Node1473	MW183956.1	3702	surface_glycoprotein	Mesocricetus auratus	Homo sapiens	Coronaviridae_12	Coronaviridae	TRUE	-0.269603	1579	Entry
Node1473	MW185825.1	1248	nucleocapsid_phosphoprotein	Mesocricetus auratus	Homo sapiens	Coronaviridae_12	Coronaviridae	TRUE	-0.519626	1579	Structural
Node1473	MW185825.1	21195	ORF1ab_polyprotein	Mesocricetus auratus	Homo sapiens	Coronaviridae_12	Coronaviridae	TRUE	0.331641	1579	Replication-associated
Node1473	MW243586.1	669	membrane_glycoprotein	Mesocricetus auratus	Homo sapiens	Coronaviridae_12	Coronaviridae	TRUE	-0.378459	1579	Structural
Node1473	MW243586.1	1248	nucleocapsid_phosphoprotein	Mesocricetus auratus	Homo sapiens	Coronaviridae_12	Coronaviridae	TRUE	-0.266015	1579	Structural
Node1473	MW243586.1	21195	ORF1ab_polyprotein	Mesocricetus auratus	Homo sapiens	Coronaviridae_12	Coronaviridae	TRUE	0.276031	1579	Replication-associated
Node1473	MW243586.1	3687	surface_glycoprotein	Mesocricetus auratus	Homo sapiens	Coronaviridae_12	Coronaviridae	TRUE	0.031474	1579	Entry
Node1473	MW273784.1	13125	ORF1a_polyprotein	Mesocricetus auratus	Homo sapiens	Coronaviridae_12	Coronaviridae	TRUE	-0.646196	1579	Replication-associated
Node1473	MW273784.1	21195	ORF1ab_polyprotein	Mesocricetus auratus	Homo sapiens	Coronaviridae_12	Coronaviridae	TRUE	-0.178619	1579	Replication-associated
Node1473	MW295556.1	13125	ORF1a_polyprotein	Mesocricetus auratus	Homo sapiens	Coronaviridae_12	Coronaviridae	TRUE	-0.509284	1579	Replication-associated
Node1473	MW295556.1	21195	ORF1ab_polyprotein	Mesocricetus auratus	Homo sapiens	Coronaviridae_12	Coronaviridae	TRUE	-0.172607	1579	Replication-associated
Node1473	MW295556.1	828	ORF3a_protein	Mesocricetus auratus	Homo sapiens	Coronaviridae_12	Coronaviridae	TRUE	-0.393531	1579	Auxiliary
Node1473	MW320733.1	1248	nucleocapsid_phosphoprotein	Mesocricetus auratus	Homo sapiens	Coronaviridae_12	Coronaviridae	TRUE	-0.018623	1579	Structural
Node1473	MW320733.1	13125	ORF1a_polyprotein	Mesocricetus auratus	Homo sapiens	Coronaviridae_12	Coronaviridae	TRUE	-0.68967	1579	Replication-associated
Node1473	MW320733.1	21192	ORF1ab_polyprotein	Mesocricetus auratus	Homo sapiens	Coronaviridae_12	Coronaviridae	TRUE	-0.759625	1579	Replication-associated
Node1473	MW320733.1	3696	surface_glycoprotein	Mesocricetus auratus	Homo sapiens	Coronaviridae_12	Coronaviridae	TRUE	0.0311403	1579	Entry
Node1473	MW320754.1	1248	nucleocapsid_phosphoprotein	Mesocricetus auratus	Homo sapiens	Coronaviridae_12	Coronaviridae	TRUE	-0.018623	1579	Structural
Node1473	MW320754.1	13119	ORF1a_polyprotein	Mesocricetus auratus	Homo sapiens	Coronaviridae_12	Coronaviridae	TRUE	-0.388647	1579	Replication-associated
Node1473	MW320754.1	21189	ORF1ab_polyprotein	Mesocricetus auratus	Homo sapiens	Coronaviridae_12	Coronaviridae	TRUE	-0.671154	1579	Replication-associated
Node1473	MW320754.1	3621	surface_glycoprotein	Mesocricetus auratus	Homo sapiens	Coronaviridae_12	Coronaviridae	TRUE	-0.269962	1579	Entry
Node1473	MW320831.1	1248	nucleocapsid_phosphoprotein	Mesocricetus auratus	Homo sapiens	Coronaviridae_12	Coronaviridae	TRUE	-0.018623	1579	Structural
Node1473	MW320831.1	13122	ORF1a_polyprotein	Mesocricetus auratus	Homo sapiens	Coronaviridae_12	Coronaviridae	TRUE	-0.86582	1579	Replication-associated
Node1473	MW320831.1	21192	ORF1ab_polyprotein	Mesocricetus auratus	Homo sapiens	Coronaviridae_12	Coronaviridae	TRUE	-0.83309	1579	Replication-associated
Node1473	MW320831.1	3591	surface_glycoprotein	Mesocricetus auratus	Homo sapiens	Coronaviridae_12	Coronaviridae	TRUE	-0.325648	1579	Entry
Node1473	MW320901.1	1248	nucleocapsid_phosphoprotein	Mesocricetus auratus	Homo sapiens	Coronaviridae_12	Coronaviridae	TRUE	-0.018623	1579	Structural
Node1473	MW320901.1	13125	ORF1a_polyprotein	Mesocricetus auratus	Homo sapiens	Coronaviridae_12	Coronaviridae	TRUE	-0.388651	1579	Replication-associated
Node1473	MW320901.1	21195	ORF1ab_polyprotein	Mesocricetus auratus	Homo sapiens	Coronaviridae_12	Coronaviridae	TRUE	-0.515237	1579	Replication-associated
Node1473	MW320901.1	3702	surface_glycoprotein	Mesocricetus auratus	Homo sapiens	Coronaviridae_12	Coronaviridae	TRUE	-0.269603	1579	Entry
Node1473	MW321053.1	1248	nucleocapsid_phosphoprotein	Mesocricetus auratus	Homo sapiens	Coronaviridae_12	Coronaviridae	TRUE	-0.018623	1579	Structural
Node1473	MW321053.1	13125	ORF1a_polyprotein	Mesocricetus auratus	Homo sapiens	Coronaviridae_12	Coronaviridae	TRUE	-0.388651	1579	Replication-associated
Node1473	MW321053.1	21195	ORF1ab_polyprotein	Mesocricetus auratus	Homo sapiens	Coronaviridae_12	Coronaviridae	TRUE	-0.515237	1579	Replication-associated
Node1473	MW321053.1	3651	surface_glycoprotein	Mesocricetus auratus	Homo sapiens	Coronaviridae_12	Coronaviridae	TRUE	-0.26969	1579	Entry
Node1473	MW321272.1	1248	nucleocapsid_phosphoprotein	Mesocricetus auratus	Homo sapiens	Coronaviridae_12	Coronaviridae	TRUE	-0.018623	1579	Structural
Node1473	MW321272.1	13125	ORF1a_polyprotein	Mesocricetus auratus	Homo sapiens	Coronaviridae_12	Coronaviridae	TRUE	-0.388651	1579	Replication-associated
Node1473	MW321272.1	21192	ORF1ab_polyprotein	Mesocricetus auratus	Homo sapiens	Coronaviridae_12	Coronaviridae	TRUE	-0.515288	1579	Replication-associated
Node1473	MW321272.1	3702	surface_glycoprotein	Mesocricetus auratus	Homo sapiens	Coronaviridae_12	Coronaviridae	TRUE	-0.269603	1579	Entry
Node1473	MW327511.1	1248	nucleocapsid_phosphoprotein	Mesocricetus auratus	Homo sapiens	Coronaviridae_12	Coronaviridae	TRUE	-0.018623	1579	Structural
Node1473	MW327511.1	13125	ORF1a_polyprotein	Mesocricetus auratus	Homo sapiens	Coronaviridae_12	Coronaviridae	TRUE	0.169999	1579	Replication-associated
Node1473	MW327511.1	21195	ORF1ab_polyprotein	Mesocricetus auratus	Homo sapiens	Coronaviridae_12	Coronaviridae	TRUE	0.0835945	1579	Replication-associated
Node1473	MW341464.1	1248	nucleocapsid_phosphoprotein	Mesocricetus auratus	Homo sapiens	Coronaviridae_12	Coronaviridae	TRUE	-0.018623	1579	Structural
Node1473	MW341464.1	13122	ORF1a_polyprotein	Mesocricetus auratus	Homo sapiens	Coronaviridae_12	Coronaviridae	TRUE	-0.471598	1579	Replication-associated
Node1473	MW341464.1	21189	ORF1ab_polyprotein	Mesocricetus auratus	Homo sapiens	Coronaviridae_12	Coronaviridae	TRUE	-0.131013	1579	Replication-associated
Node1473	MW341464.1	3702	surface_glycoprotein	Mesocricetus auratus	Homo sapiens	Coronaviridae_12	Coronaviridae	TRUE	-0.388099	1579	Entry
Node1473	MW364992.1	13125	ORF1a_polyprotein	Mesocricetus auratus	Homo sapiens	Coronaviridae_12	Coronaviridae	TRUE	-0.271543	1579	Replication-associated
Node1473	MW364992.1	21195	ORF1ab_polyprotein	Mesocricetus auratus	Homo sapiens	Coronaviridae_12	Coronaviridae	TRUE	0.0305031	1579	Replication-associated
Node1473	MW365043.1	1248	nucleocapsid_phosphoprotein	Mesocricetus auratus	Homo sapiens	Coronaviridae_12	Coronaviridae	TRUE	-0.018623	1579	Structural
Node1473	MW365125.1	1248	nucleocapsid_phosphoprotein	Mesocricetus auratus	Homo sapiens	Coronaviridae_12	Coronaviridae	TRUE	-0.018623	1579	Structural
Node1473	MW365131.1	21195	ORF1ab_polyprotein	Mesocricetus auratus	Homo sapiens	Coronaviridae_12	Coronaviridae	TRUE	-0.571688	1579	Replication-associated
Node1473	MW365281.1	13125	ORF1a_polyprotein	Mesocricetus auratus	Homo sapiens	Coronaviridae_12	Coronaviridae	TRUE	-0.572603	1579	Replication-associated
Node1473	MW365281.1	21195	ORF1ab_polyprotein	Mesocricetus auratus	Homo sapiens	Coronaviridae_12	Coronaviridae	TRUE	-0.270548	1579	Replication-associated
Node1473	MW375730.1	21195	ORF1ab_polyprotein	Mesocricetus auratus	Homo sapiens	Coronaviridae_12	Coronaviridae	TRUE	-0.270558	1579	Replication-associated
Node1473	MW422091.1	13125	ORF1a_polyprotein	Mesocricetus auratus	Homo sapiens	Coronaviridae_12	Coronaviridae	TRUE	-0.0874779	1579	Replication-associated
Node1473	MW422091.1	21195	ORF1ab_polyprotein	Mesocricetus auratus	Homo sapiens	Coronaviridae_12	Coronaviridae	TRUE	0.130885	1579	Replication-associated
Node1473	MW433718.1	21165	ORF1ab_polyprotein	Mesocricetus auratus	Homo sapiens	Coronaviridae_12	Coronaviridae	TRUE	0.030546	1579	Replication-associated
Node1473	MW435552.1	1248	nucleocapsid_phosphoprotein	Mesocricetus auratus	Homo sapiens	Coronaviridae_12	Coronaviridae	TRUE	-0.018623	1579	Structural
Node1473	MW435552.1	21195	ORF1ab_polyprotein	Mesocricetus auratus	Homo sapiens	Coronaviridae_12	Coronaviridae	TRUE	0.452227	1579	Replication-associated
Node1473	MW435552.1	3702	surface_glycoprotein	Mesocricetus auratus	Homo sapiens	Coronaviridae_12	Coronaviridae	TRUE	-0.387942	1579	Entry
Node1473	MW446216.1	21195	ORF1ab_polyprotein	Mesocricetus auratus	Homo sapiens	Coronaviridae_12	Coronaviridae	TRUE	0.498959	1579	Replication-associated
Node1473	MW446230.1	21195	ORF1ab_polyprotein	Mesocricetus auratus	Homo sapiens	Coronaviridae_12	Coronaviridae	TRUE	0.626168	1579	Replication-associated
Node1473	MW453085.1	21195	ORF1ab_polyprotein	Mesocricetus auratus	Homo sapiens	Coronaviridae_12	Coronaviridae	TRUE	-0.57161	1579	Replication-associated
Node1473	MW467434.1	1248	nucleocapsid_phosphoprotein	Mesocricetus auratus	Homo sapiens	Coronaviridae_12	Coronaviridae	TRUE	0.138789	1579	Structural
Node1473	MW467434.1	13125	ORF1a_polyprotein	Mesocricetus auratus	Homo sapiens	Coronaviridae_12	Coronaviridae	TRUE	0.330609	1579	Replication-associated
Node1473	MW467434.1	21195	ORF1ab_polyprotein	Mesocricetus auratus	Homo sapiens	Coronaviridae_12	Coronaviridae	TRUE	-0.0487072	1579	Replication-associated
Node1473	MW467434.1	3702	surface_glycoprotein	Mesocricetus auratus	Homo sapiens	Coronaviridae_12	Coronaviridae	TRUE	-0.387498	1579	Entry
Node1473	MW485249.1	1248	nucleocapsid_phosphoprotein	Mesocricetus auratus	Homo sapiens	Coronaviridae_12	Coronaviridae	TRUE	-0.018623	1579	Structural
Node1473	MW485249.1	13125	ORF1a_polyprotein	Mesocricetus auratus	Homo sapiens	Coronaviridae_12	Coronaviridae	TRUE	0.169895	1579	Replication-associated
Node1473	MW485249.1	21195	ORF1ab_polyprotein	Mesocricetus auratus	Homo sapiens	Coronaviridae_12	Coronaviridae	TRUE	-0.261646	1579	Replication-associated
Node1473	MW532100.1	1248	nucleocapsid_phosphoprotein	Mesocricetus auratus	Homo sapiens	Coronaviridae_12	Coronaviridae	TRUE	0.138789	1579	Structural
Node1473	MW532100.1	13125	ORF1a_polyprotein	Mesocricetus auratus	Homo sapiens	Coronaviridae_12	Coronaviridae	TRUE	-0.169983	1579	Replication-associated
Node1473	MW532100.1	21195	ORF1ab_polyprotein	Mesocricetus auratus	Homo sapiens	Coronaviridae_12	Coronaviridae	TRUE	0.151078	1579	Replication-associated
Node1473	MW595908.1	13125	ORF1a_polyprotein	Mesocricetus auratus	Homo sapiens	Coronaviridae_12	Coronaviridae	TRUE	-0.204333	1579	Replication-associated
Node1473	MW595908.1	21195	ORF1ab_polyprotein	Mesocricetus auratus	Homo sapiens	Coronaviridae_12	Coronaviridae	TRUE	-0.230166	1579	Replication-associated
Node1473	MW595918.1	13125	ORF1a_polyprotein	Mesocricetus auratus	Homo sapiens	Coronaviridae_12	Coronaviridae	TRUE	0.150968	1579	Replication-associated
Node1473	MW595918.1	21195	ORF1ab_polyprotein	Mesocricetus auratus	Homo sapiens	Coronaviridae_12	Coronaviridae	TRUE	-0.207217	1579	Replication-associated
Node1473	MW595918.1	3702	surface_glycoprotein	Mesocricetus auratus	Homo sapiens	Coronaviridae_12	Coronaviridae	TRUE	-0.387851	1579	Entry
Node1473	MW598422.1	1248	nucleocapsid_phosphoprotein	Mesocricetus auratus	Homo sapiens	Coronaviridae_12	Coronaviridae	TRUE	-0.0232653	1579	Structural
Node1473	MW598422.1	13125	ORF1a_polyprotein	Mesocricetus auratus	Homo sapiens	Coronaviridae_12	Coronaviridae	TRUE	-0.529353	1579	Replication-associated
Node1473	MW598422.1	21195	ORF1ab_polyprotein	Mesocricetus auratus	Homo sapiens	Coronaviridae_12	Coronaviridae	TRUE	-0.413405	1579	Replication-associated
Node1473	MW704285.1	1248	nucleocapsid_phosphoprotein	Mesocricetus auratus	Homo sapiens	Coronaviridae_12	Coronaviridae	TRUE	-0.0232653	1579	Structural
Node1473	MW704285.1	13125	ORF1a_polyprotein	Mesocricetus auratus	Homo sapiens	Coronaviridae_12	Coronaviridae	TRUE	0.188317	1579	Replication-associated
Node1473	MW704285.1	21195	ORF1ab_polyprotein	Mesocricetus auratus	Homo sapiens	Coronaviridae_12	Coronaviridae	TRUE	-0.0796954	1579	Replication-associated
Node1473	MW704353.1	1248	nucleocapsid_phosphoprotein	Mesocricetus auratus	Homo sapiens	Coronaviridae_12	Coronaviridae	TRUE	-0.018623	1579	Structural
Node1473	MW704353.1	13125	ORF1a_polyprotein	Mesocricetus auratus	Homo sapiens	Coronaviridae_12	Coronaviridae	TRUE	-0.23802	1579	Replication-associated
Node1473	MW704353.1	21195	ORF1ab_polyprotein	Mesocricetus auratus	Homo sapiens	Coronaviridae_12	Coronaviridae	TRUE	-0.115025	1579	Replication-associated
Node1473	MW704353.1	360	ORF8_protein	Mesocricetus auratus	Homo sapiens	Coronaviridae_12	Coronaviridae	TRUE	-0.395146	1579	Auxiliary
Node1473	MW735438.1	1248	nucleocapsid_phosphoprotein	Mesocricetus auratus	Homo sapiens	Coronaviridae_12	Coronaviridae	TRUE	-0.0232653	1579	Structural
Node1473	MW735438.1	13125	ORF1a_polyprotein	Mesocricetus auratus	Homo sapiens	Coronaviridae_12	Coronaviridae	TRUE	0.0031315	1579	Replication-associated
Node1473	MW735438.1	21192	ORF1ab_polyprotein	Mesocricetus auratus	Homo sapiens	Coronaviridae_12	Coronaviridae	TRUE	-0.371327	1579	Replication-associated
Node1473	MW757191.1	21195	ORF1ab_polyprotein	Mesocricetus auratus	Homo sapiens	Coronaviridae_12	Coronaviridae	TRUE	0.428538	1579	Replication-associated
Node1473	MW757191.1	3702	surface_glycoprotein	Mesocricetus auratus	Homo sapiens	Coronaviridae_12	Coronaviridae	TRUE	-0.648015	1579	Entry
Node1473	MW881790.1	1242	nucleocapsid_phosphoprotein	Mesocricetus auratus	Homo sapiens	Coronaviridae_12	Coronaviridae	TRUE	-0.0232406	1579	Structural
Node1473	MW881790.1	13110	ORF1a_polyprotein	Mesocricetus auratus	Homo sapiens	Coronaviridae_12	Coronaviridae	TRUE	-0.20135	1579	Replication-associated
Node1473	MW881790.1	21165	ORF1ab_polyprotein	Mesocricetus auratus	Homo sapiens	Coronaviridae_12	Coronaviridae	TRUE	-0.393753	1579	Replication-associated
Node1473	MW881790.1	3699	surface_glycoprotein	Mesocricetus auratus	Homo sapiens	Coronaviridae_12	Coronaviridae	TRUE	0.41284	1579	Entry
Node1473	MW882494.1	13122	ORF1a_polyprotein	Mesocricetus auratus	Homo sapiens	Coronaviridae_12	Coronaviridae	TRUE	0.470952	1579	Replication-associated
Node1473	MW882494.1	21192	ORF1ab_polyprotein	Mesocricetus auratus	Homo sapiens	Coronaviridae_12	Coronaviridae	TRUE	0.35887	1579	Replication-associated
Node1473	MW913381.1	1248	nucleocapsid_phosphoprotein	Mesocricetus auratus	Homo sapiens	Coronaviridae_12	Coronaviridae	TRUE	0.0455788	1579	Structural
Node1473	MW913381.1	13125	ORF1a_polyprotein	Mesocricetus auratus	Homo sapiens	Coronaviridae_12	Coronaviridae	TRUE	-0.210108	1579	Replication-associated
Node1473	MW913381.1	21195	ORF1ab_polyprotein	Mesocricetus auratus	Homo sapiens	Coronaviridae_12	Coronaviridae	TRUE	-0.395146	1579	Replication-associated
Node1473	MW962308.1	1248	nucleocapsid_phosphoprotein	Mesocricetus auratus	Homo sapiens	Coronaviridae_12	Coronaviridae	TRUE	0.176062	1579	Structural
Node1473	MW962308.1	13125	ORF1a_polyprotein	Mesocricetus auratus	Homo sapiens	Coronaviridae_12	Coronaviridae	TRUE	-0.865807	1579	Replication-associated
Node1473	MW962308.1	21195	ORF1ab_polyprotein	Mesocricetus auratus	Homo sapiens	Coronaviridae_12	Coronaviridae	TRUE	-0.172583	1579	Replication-associated
Node1473	MW962308.1	3702	surface_glycoprotein	Mesocricetus auratus	Homo sapiens	Coronaviridae_12	Coronaviridae	TRUE	-0.747186	1579	Entry
Node1473	MZ047087.1	13125	ORF1a_polyprotein	Mesocricetus auratus	Homo sapiens	Coronaviridae_12	Coronaviridae	TRUE	0.0602348	1579	Replication-associated
Node1473	MZ047087.1	21195	ORF1ab_polyprotein	Mesocricetus auratus	Homo sapiens	Coronaviridae_12	Coronaviridae	TRUE	-0.0927634	1579	Replication-associated
Node1473	MZ047087.1	3705	surface_glycoprotein	Mesocricetus auratus	Homo sapiens	Coronaviridae_12	Coronaviridae	TRUE	-0.849826	1579	Entry
Node1473	MZ068160.1	1248	nucleocapsid_phosphoprotein	Mesocricetus auratus	Homo sapiens	Coronaviridae_12	Coronaviridae	TRUE	-0.266782	1579	Structural
Node1473	MZ068160.1	13125	ORF1a_polyprotein	Mesocricetus auratus	Homo sapiens	Coronaviridae_12	Coronaviridae	TRUE	-0.223319	1579	Replication-associated
Node1473	MZ068160.1	21195	ORF1ab_polyprotein	Mesocricetus auratus	Homo sapiens	Coronaviridae_12	Coronaviridae	TRUE	-0.1562	1579	Replication-associated
Node1473	MZ068160.1	3693	surface_glycoprotein	Mesocricetus auratus	Homo sapiens	Coronaviridae_12	Coronaviridae	TRUE	0.0757737	1579	Entry
Node1473	MZ145293.1	1248	nucleocapsid_phosphoprotein	Mesocricetus auratus	Homo sapiens	Coronaviridae_12	Coronaviridae	TRUE	0.176756	1579	Structural
Node1473	MZ145293.1	13125	ORF1a_polyprotein	Mesocricetus auratus	Homo sapiens	Coronaviridae_12	Coronaviridae	TRUE	-0.346137	1579	Replication-associated
Node1473	MZ145293.1	21195	ORF1ab_polyprotein	Mesocricetus auratus	Homo sapiens	Coronaviridae_12	Coronaviridae	TRUE	-0.241289	1579	Replication-associated
Node1473	MZ145293.1	3702	surface_glycoprotein	Mesocricetus auratus	Homo sapiens	Coronaviridae_12	Coronaviridae	TRUE	-0.0868588	1579	Entry
Node1473	MZ150530.1	1248	nucleocapsid_phosphoprotein	Mesocricetus auratus	Homo sapiens	Coronaviridae_12	Coronaviridae	TRUE	-0.0232653	1579	Structural
Node1473	MZ150530.1	13125	ORF1a_polyprotein	Mesocricetus auratus	Homo sapiens	Coronaviridae_12	Coronaviridae	TRUE	-0.395185	1579	Replication-associated
Node1473	MZ150530.1	21195	ORF1ab_polyprotein	Mesocricetus auratus	Homo sapiens	Coronaviridae_12	Coronaviridae	TRUE	-0.30704	1579	Replication-associated
Node1473	MZ207856.1	1248	nucleocapsid_phosphoprotein	Mesocricetus auratus	Homo sapiens	Coronaviridae_12	Coronaviridae	TRUE	-0.165515	1579	Structural
Node1473	MZ207856.1	13125	ORF1a_polyprotein	Mesocricetus auratus	Homo sapiens	Coronaviridae_12	Coronaviridae	TRUE	-0.432261	1579	Replication-associated
Node1473	MZ207856.1	21195	ORF1ab_polyprotein	Mesocricetus auratus	Homo sapiens	Coronaviridae_12	Coronaviridae	TRUE	-0.650087	1579	Replication-associated
Node1473	MZ207856.1	3702	surface_glycoprotein	Mesocricetus auratus	Homo sapiens	Coronaviridae_12	Coronaviridae	TRUE	0.494939	1579	Entry
Node1473	MZ227545.1	1248	nucleocapsid_phosphoprotein	Mesocricetus auratus	Homo sapiens	Coronaviridae_12	Coronaviridae	TRUE	-0.31941	1579	Structural
Node1473	MZ227545.1	13125	ORF1a_polyprotein	Mesocricetus auratus	Homo sapiens	Coronaviridae_12	Coronaviridae	TRUE	-0.470692	1579	Replication-associated
Node1473	MZ227545.1	21195	ORF1ab_polyprotein	Mesocricetus auratus	Homo sapiens	Coronaviridae_12	Coronaviridae	TRUE	-0.430175	1579	Replication-associated
Node1473	MZ266456.1	13125	ORF1a_polyprotein	Mesocricetus auratus	Homo sapiens	Coronaviridae_12	Coronaviridae	TRUE	-0.529364	1579	Replication-associated
Node1473	MZ266456.1	21195	ORF1ab_polyprotein	Mesocricetus auratus	Homo sapiens	Coronaviridae_12	Coronaviridae	TRUE	-0.473777	1579	Replication-associated
Node1473	MZ266495.1	1248	nucleocapsid_phosphoprotein	Mesocricetus auratus	Homo sapiens	Coronaviridae_12	Coronaviridae	TRUE	0.0638331	1579	Structural
Node1473	MZ266495.1	13125	ORF1a_polyprotein	Mesocricetus auratus	Homo sapiens	Coronaviridae_12	Coronaviridae	TRUE	-0.307227	1579	Replication-associated
Node1473	MZ266495.1	21195	ORF1ab_polyprotein	Mesocricetus auratus	Homo sapiens	Coronaviridae_12	Coronaviridae	TRUE	-0.598737	1579	Replication-associated
Node1473	MZ266495.1	3705	surface_glycoprotein	Mesocricetus auratus	Homo sapiens	Coronaviridae_12	Coronaviridae	TRUE	0.412479	1579	Entry
Node1473	MZ266764.1	1248	nucleocapsid_phosphoprotein	Mesocricetus auratus	Homo sapiens	Coronaviridae_12	Coronaviridae	TRUE	-0.0232653	1579	Structural
Node1473	MZ266764.1	13125	ORF1a_polyprotein	Mesocricetus auratus	Homo sapiens	Coronaviridae_12	Coronaviridae	TRUE	-0.32632	1579	Replication-associated
Node1473	MZ266764.1	21195	ORF1ab_polyprotein	Mesocricetus auratus	Homo sapiens	Coronaviridae_12	Coronaviridae	TRUE	-0.373839	1579	Replication-associated
Node1473	MZ266823.1	1248	nucleocapsid_phosphoprotein	Mesocricetus auratus	Homo sapiens	Coronaviridae_12	Coronaviridae	TRUE	-0.694552	1579	Structural
Node1473	MZ266823.1	3702	surface_glycoprotein	Mesocricetus auratus	Homo sapiens	Coronaviridae_12	Coronaviridae	TRUE	-0.765815	1579	Entry
Node1473	MZ275292.1	1248	nucleocapsid_phosphoprotein	Mesocricetus auratus	Homo sapiens	Coronaviridae_12	Coronaviridae	TRUE	0.088333	1579	Structural
Node1473	MZ275292.1	13125	ORF1a_polyprotein	Mesocricetus auratus	Homo sapiens	Coronaviridae_12	Coronaviridae	TRUE	0.489375	1579	Replication-associated
Node1473	MZ275292.1	21195	ORF1ab_polyprotein	Mesocricetus auratus	Homo sapiens	Coronaviridae_12	Coronaviridae	TRUE	0.258435	1579	Replication-associated
Node1473	MZ275292.1	3648	surface_glycoprotein	Mesocricetus auratus	Homo sapiens	Coronaviridae_12	Coronaviridae	TRUE	0.152606	1579	Entry
Node1473	MZ275295.1	1248	nucleocapsid_phosphoprotein	Mesocricetus auratus	Homo sapiens	Coronaviridae_12	Coronaviridae	TRUE	0.088333	1579	Structural
Node1473	MZ275295.1	13065	ORF1a_polyprotein	Mesocricetus auratus	Homo sapiens	Coronaviridae_12	Coronaviridae	TRUE	0.0121119	1579	Replication-associated
Node1473	MZ275295.1	21135	ORF1ab_polyprotein	Mesocricetus auratus	Homo sapiens	Coronaviridae_12	Coronaviridae	TRUE	-0.0797137	1579	Replication-associated
Node1473	MZ275295.1	3681	surface_glycoprotein	Mesocricetus auratus	Homo sapiens	Coronaviridae_12	Coronaviridae	TRUE	0.432771	1579	Entry
Node1473	MZ277393.1	1248	nucleocapsid_phosphoprotein	Mesocricetus auratus	Homo sapiens	Coronaviridae_12	Coronaviridae	TRUE	-0.0232653	1579	Structural
Node1473	MZ277393.1	13125	ORF1a_polyprotein	Mesocricetus auratus	Homo sapiens	Coronaviridae_12	Coronaviridae	TRUE	-0.201407	1579	Replication-associated
Node1473	MZ277393.1	21195	ORF1ab_polyprotein	Mesocricetus auratus	Homo sapiens	Coronaviridae_12	Coronaviridae	TRUE	-0.393809	1579	Replication-associated
Node1473	MZ277393.1	3705	surface_glycoprotein	Mesocricetus auratus	Homo sapiens	Coronaviridae_12	Coronaviridae	TRUE	0.412479	1579	Entry
Node1473	MZ323727.1	1248	nucleocapsid_phosphoprotein	Mesocricetus auratus	Homo sapiens	Coronaviridae_12	Coronaviridae	TRUE	-0.018623	1579	Structural
Node1473	MZ323727.1	13125	ORF1a_polyprotein	Mesocricetus auratus	Homo sapiens	Coronaviridae_12	Coronaviridae	TRUE	0.170019	1579	Replication-associated
Node1473	MZ323727.1	21195	ORF1ab_polyprotein	Mesocricetus auratus	Homo sapiens	Coronaviridae_12	Coronaviridae	TRUE	0.00359384	1579	Replication-associated
Node1473	MZ323727.1	3702	surface_glycoprotein	Mesocricetus auratus	Homo sapiens	Coronaviridae_12	Coronaviridae	TRUE	-0.388099	1579	Entry
Node1473	MZ327801.1	13125	ORF1a_polyprotein	Mesocricetus auratus	Homo sapiens	Coronaviridae_12	Coronaviridae	TRUE	-1.05012	1579	Replication-associated
Node1473	MZ327801.1	3702	surface_glycoprotein	Mesocricetus auratus	Homo sapiens	Coronaviridae_12	Coronaviridae	TRUE	-0.387942	1579	Entry
Node1473	MZ327801.1	21165	truncated_ORF1ab_polyprotein	Mesocricetus auratus	Homo sapiens	Coronaviridae_12	Coronaviridae	TRUE	-0.873056	1579	Replication-associated
Node1473	MZ332414.1	1248	nucleocapsid_phosphoprotein	Mesocricetus auratus	Homo sapiens	Coronaviridae_12	Coronaviridae	TRUE	-0.018623	1579	Structural
Node1473	MZ332414.1	21195	ORF1ab_polyprotein	Mesocricetus auratus	Homo sapiens	Coronaviridae_12	Coronaviridae	TRUE	-0.270601	1579	Replication-associated
Node1473	MZ336023.1	1248	nucleocapsid_phosphoprotein	Mesocricetus auratus	Homo sapiens	Coronaviridae_12	Coronaviridae	TRUE	-0.018623	1579	Structural
Node1473	MZ336023.1	13125	ORF1a_polyprotein	Mesocricetus auratus	Homo sapiens	Coronaviridae_12	Coronaviridae	TRUE	0.131195	1579	Replication-associated
Node1473	MZ336023.1	21195	ORF1ab_polyprotein	Mesocricetus auratus	Homo sapiens	Coronaviridae_12	Coronaviridae	TRUE	-0.00563173	1579	Replication-associated
Node1473	MZ336023.1	828	ORF3a_protein	Mesocricetus auratus	Homo sapiens	Coronaviridae_12	Coronaviridae	TRUE	-0.397435	1579	Auxiliary
Node1473	MZ348313.1	13125	ORF1a_polyprotein	Mesocricetus auratus	Homo sapiens	Coronaviridae_12	Coronaviridae	TRUE	0.535534	1579	Replication-associated
Node1473	MZ348313.1	21195	ORF1ab_polyprotein	Mesocricetus auratus	Homo sapiens	Coronaviridae_12	Coronaviridae	TRUE	0.225522	1579	Replication-associated
Node1473	MZ348313.1	360	ORF8_protein	Mesocricetus auratus	Homo sapiens	Coronaviridae_12	Coronaviridae	TRUE	-0.258987	1579	Auxiliary
Node1473	MZ380275.1	1248	nucleocapsid_phosphoprotein	Mesocricetus auratus	Homo sapiens	Coronaviridae_12	Coronaviridae	TRUE	0.138789	1579	Structural
Node1473	MZ380275.1	13125	ORF1a_polyprotein	Mesocricetus auratus	Homo sapiens	Coronaviridae_12	Coronaviridae	TRUE	0.469298	1579	Replication-associated
Node1473	MZ380275.1	21195	ORF1ab_polyprotein	Mesocricetus auratus	Homo sapiens	Coronaviridae_12	Coronaviridae	TRUE	0.266249	1579	Replication-associated
Node1473	MZ380275.1	3702	surface_glycoprotein	Mesocricetus auratus	Homo sapiens	Coronaviridae_12	Coronaviridae	TRUE	0.111772	1579	Entry
Node1473	MZ394584.1	1248	nucleocapsid_phosphoprotein	Mesocricetus auratus	Homo sapiens	Coronaviridae_12	Coronaviridae	TRUE	-0.0232653	1579	Structural
Node1473	MZ394584.1	13125	ORF1a_polyprotein	Mesocricetus auratus	Homo sapiens	Coronaviridae_12	Coronaviridae	TRUE	-0.668062	1579	Replication-associated
Node1473	MZ394584.1	21195	ORF1ab_polyprotein	Mesocricetus auratus	Homo sapiens	Coronaviridae_12	Coronaviridae	TRUE	-0.535327	1579	Replication-associated
Node1473	MZ397171.1	13125	ORF1a_polyprotein	Mesocricetus auratus	Homo sapiens	Coronaviridae_12	Coronaviridae	TRUE	-0.0816949	1579	Replication-associated
Node1473	MZ397171.1	21195	ORF1ab_polyprotein	Mesocricetus auratus	Homo sapiens	Coronaviridae_12	Coronaviridae	TRUE	0.0728606	1579	Replication-associated
Node1473	MZ411526.1	13125	ORF1a_polyprotein	Mesocricetus auratus	Homo sapiens	Coronaviridae_12	Coronaviridae	TRUE	0.104239	1579	Replication-associated
Node1473	MZ411526.1	21195	ORF1ab_polyprotein	Mesocricetus auratus	Homo sapiens	Coronaviridae_12	Coronaviridae	TRUE	0.0376945	1579	Replication-associated
Node1473	MZ411526.1	3702	surface_glycoprotein	Mesocricetus auratus	Homo sapiens	Coronaviridae_12	Coronaviridae	TRUE	-0.388266	1579	Entry
Node1473	MZ436885.1	1248	nucleocapsid_phosphoprotein	Mesocricetus auratus	Homo sapiens	Coronaviridae_12	Coronaviridae	TRUE	-0.218423	1579	Structural
Node1473	MZ436885.1	21195	ORF1ab_polyprotein	Mesocricetus auratus	Homo sapiens	Coronaviridae_12	Coronaviridae	TRUE	-0.311702	1579	Replication-associated
Node1473	MZ458117.1	1248	nucleocapsid_phosphoprotein	Mesocricetus auratus	Homo sapiens	Coronaviridae_12	Coronaviridae	TRUE	0.176062	1579	Structural
Node1473	MZ458117.1	21195	ORF1ab_polyprotein	Mesocricetus auratus	Homo sapiens	Coronaviridae_12	Coronaviridae	TRUE	0.674204	1579	Replication-associated
Node1473	MZ458117.1	3702	surface_glycoprotein	Mesocricetus auratus	Homo sapiens	Coronaviridae_12	Coronaviridae	TRUE	-0.0235629	1579	Entry
Node1473	MZ506316.1	1248	nucleocapsid_phosphoprotein	Mesocricetus auratus	Homo sapiens	Coronaviridae_12	Coronaviridae	TRUE	-0.0232653	1579	Structural
Node1473	MZ506316.1	13125	ORF1a_polyprotein	Mesocricetus auratus	Homo sapiens	Coronaviridae_12	Coronaviridae	TRUE	-0.0927954	1579	Replication-associated
Node1473	MZ506316.1	21129	ORF1ab_polyprotein	Mesocricetus auratus	Homo sapiens	Coronaviridae_12	Coronaviridae	TRUE	-0.306948	1579	Replication-associated
Node1473	MZ520115.1	13125	ORF1a_polyprotein	Mesocricetus auratus	Homo sapiens	Coronaviridae_12	Coronaviridae	TRUE	-0.256237	1579	Replication-associated
Node1473	MZ520115.1	21195	ORF1ab_polyprotein	Mesocricetus auratus	Homo sapiens	Coronaviridae_12	Coronaviridae	TRUE	-0.207269	1579	Replication-associated
Node1473	MZ520115.1	3693	surface_glycoprotein	Mesocricetus auratus	Homo sapiens	Coronaviridae_12	Coronaviridae	TRUE	0.52852	1579	Entry
Node1473	MZ562754.1	13125	ORF1a_polyprotein	Mesocricetus auratus	Homo sapiens	Coronaviridae_12	Coronaviridae	TRUE	-0.34624	1579	Replication-associated
Node1473	MZ562754.1	21195	ORF1ab_polyprotein	Mesocricetus auratus	Homo sapiens	Coronaviridae_12	Coronaviridae	TRUE	-0.393707	1579	Replication-associated
Node1473	MZ562754.1	3702	surface_glycoprotein	Mesocricetus auratus	Homo sapiens	Coronaviridae_12	Coronaviridae	TRUE	-0.269603	1579	Entry
Node1473	MZ579101.1	13116	ORF1a_polyprotein	Mesocricetus auratus	Homo sapiens	Coronaviridae_12	Coronaviridae	TRUE	0.330544	1579	Replication-associated
Node1473	MZ579101.1	21186	ORF1ab_polyprotein	Mesocricetus auratus	Homo sapiens	Coronaviridae_12	Coronaviridae	TRUE	0.188709	1579	Replication-associated
Node1473	MZ579101.1	828	ORF3a_protein	Mesocricetus auratus	Homo sapiens	Coronaviridae_12	Coronaviridae	TRUE	-0.0350335	1579	Auxiliary
Node1473	MZ579101.1	3702	surface_glycoprotein	Mesocricetus auratus	Homo sapiens	Coronaviridae_12	Coronaviridae	TRUE	0.0511865	1579	Entry
Node1473	MZ611963.1	1248	nucleocapsid_phosphoprotein	Mesocricetus auratus	Homo sapiens	Coronaviridae_12	Coronaviridae	TRUE	0.346263	1579	Structural
Node1473	MZ611963.1	13116	ORF1a_polyprotein	Mesocricetus auratus	Homo sapiens	Coronaviridae_12	Coronaviridae	TRUE	-0.435559	1579	Replication-associated
Node1473	MZ611963.1	21186	ORF1ab_polyprotein	Mesocricetus auratus	Homo sapiens	Coronaviridae_12	Coronaviridae	TRUE	-0.325121	1579	Replication-associated
Node1473	MZ662118.1	1248	nucleocapsid_phosphoprotein	Mesocricetus auratus	Homo sapiens	Coronaviridae_12	Coronaviridae	TRUE	-0.166463	1579	Structural
Node1473	MZ662118.1	13125	ORF1a_polyprotein	Mesocricetus auratus	Homo sapiens	Coronaviridae_12	Coronaviridae	TRUE	-0.0939555	1579	Replication-associated
Node1473	MZ662118.1	21195	ORF1ab_polyprotein	Mesocricetus auratus	Homo sapiens	Coronaviridae_12	Coronaviridae	TRUE	-0.195129	1579	Replication-associated
Node1473	MZ895668.1	1248	nucleocapsid_phosphoprotein	Mesocricetus auratus	Homo sapiens	Coronaviridae_12	Coronaviridae	TRUE	0.176062	1579	Structural
Node1473	MZ895668.1	21195	ORF1ab_polyprotein	Mesocricetus auratus	Homo sapiens	Coronaviridae_12	Coronaviridae	TRUE	0.40713	1579	Replication-associated
Node1473	MZ895668.1	3693	surface_glycoprotein	Mesocricetus auratus	Homo sapiens	Coronaviridae_12	Coronaviridae	TRUE	-0.0234797	1579	Entry
Node1473	MZ895683.1	1248	nucleocapsid_phosphoprotein	Mesocricetus auratus	Homo sapiens	Coronaviridae_12	Coronaviridae	TRUE	0.176062	1579	Structural
Node1473	MZ895683.1	13125	ORF1a_polyprotein	Mesocricetus auratus	Homo sapiens	Coronaviridae_12	Coronaviridae	TRUE	-0.0251371	1579	Replication-associated
Node1473	MZ895683.1	21195	ORF1ab_polyprotein	Mesocricetus auratus	Homo sapiens	Coronaviridae_12	Coronaviridae	TRUE	-0.306816	1579	Replication-associated
Node1473	MZ895711.1	1248	nucleocapsid_phosphoprotein	Mesocricetus auratus	Homo sapiens	Coronaviridae_12	Coronaviridae	TRUE	0.176062	1579	Structural
Node1473	MZ895711.1	21195	ORF1ab_polyprotein	Mesocricetus auratus	Homo sapiens	Coronaviridae_12	Coronaviridae	TRUE	0.660062	1579	Replication-associated
Node1473	MZ895711.1	3702	surface_glycoprotein	Mesocricetus auratus	Homo sapiens	Coronaviridae_12	Coronaviridae	TRUE	-0.324705	1579	Entry
Node1473	OK001872.1	1248	nucleocapsid_phosphoprotein	Mesocricetus auratus	Homo sapiens	Coronaviridae_12	Coronaviridae	TRUE	0.138789	1579	Structural
Node1473	OK001872.1	13125	ORF1a_polyprotein	Mesocricetus auratus	Homo sapiens	Coronaviridae_12	Coronaviridae	TRUE	0.370355	1579	Replication-associated
Node1473	OK001872.1	21195	ORF1ab_polyprotein	Mesocricetus auratus	Homo sapiens	Coronaviridae_12	Coronaviridae	TRUE	0.313923	1579	Replication-associated
Node1473	OK001872.1	3702	surface_glycoprotein	Mesocricetus auratus	Homo sapiens	Coronaviridae_12	Coronaviridae	TRUE	-0.689934	1579	Entry
Node1473	OK001927.1	1248	nucleocapsid_phosphoprotein	Mesocricetus auratus	Homo sapiens	Coronaviridae_12	Coronaviridae	TRUE	0.138789	1579	Structural
Node1473	OK001927.1	21195	ORF1ab_polyprotein	Mesocricetus auratus	Homo sapiens	Coronaviridae_12	Coronaviridae	TRUE	0.791069	1579	Replication-associated
Node1473	OK001927.1	3702	surface_glycoprotein	Mesocricetus auratus	Homo sapiens	Coronaviridae_12	Coronaviridae	TRUE	0.0361138	1579	Entry
Node1473	OK018332.1	1248	nucleocapsid_phosphoprotein	Mesocricetus auratus	Homo sapiens	Coronaviridae_12	Coronaviridae	TRUE	-0.0232653	1579	Structural
Node1473	OK018332.1	13125	ORF1a_polyprotein	Mesocricetus auratus	Homo sapiens	Coronaviridae_12	Coronaviridae	TRUE	-0.668062	1579	Replication-associated
Node1473	OK018332.1	21195	ORF1ab_polyprotein	Mesocricetus auratus	Homo sapiens	Coronaviridae_12	Coronaviridae	TRUE	-0.569039	1579	Replication-associated
Node1473	OK018333.1	1248	nucleocapsid_phosphoprotein	Mesocricetus auratus	Homo sapiens	Coronaviridae_12	Coronaviridae	TRUE	-0.0232653	1579	Structural
Node1473	OK018333.1	13125	ORF1a_polyprotein	Mesocricetus auratus	Homo sapiens	Coronaviridae_12	Coronaviridae	TRUE	-0.668062	1579	Replication-associated
Node1473	OK018333.1	21195	ORF1ab_polyprotein	Mesocricetus auratus	Homo sapiens	Coronaviridae_12	Coronaviridae	TRUE	-0.535327	1579	Replication-associated
Node1473	OK104589.1	13125	ORF1a_polyprotein	Mesocricetus auratus	Homo sapiens	Coronaviridae_12	Coronaviridae	TRUE	-0.131096	1579	Replication-associated
Node1473	OK104589.1	21195	ORF1ab_polyprotein	Mesocricetus auratus	Homo sapiens	Coronaviridae_12	Coronaviridae	TRUE	-0.00576019	1579	Replication-associated
Node1473	OK426602.1	1248	nucleocapsid_phosphoprotein	Mesocricetus auratus	Homo sapiens	Coronaviridae_12	Coronaviridae	TRUE	-0.0232653	1579	Structural
Node1473	OK426602.1	13125	ORF1a_polyprotein	Mesocricetus auratus	Homo sapiens	Coronaviridae_12	Coronaviridae	TRUE	-0.307232	1579	Replication-associated
Node1473	OK426602.1	21195	ORF1ab_polyprotein	Mesocricetus auratus	Homo sapiens	Coronaviridae_12	Coronaviridae	TRUE	-0.540686	1579	Replication-associated
Node1473	OK426652.1	1248	nucleocapsid_phosphoprotein	Mesocricetus auratus	Homo sapiens	Coronaviridae_12	Coronaviridae	TRUE	-0.321566	1579	Structural
Node1473	OK426652.1	21183	ORF1ab_polyprotein	Mesocricetus auratus	Homo sapiens	Coronaviridae_12	Coronaviridae	TRUE	-1.07881	1579	Replication-associated
Node1473	OK426659.1	21192	ORF1ab_polyprotein	Mesocricetus auratus	Homo sapiens	Coronaviridae_12	Coronaviridae	TRUE	-0.116333	1579	Replication-associated
Node1473	OK426659.1	3702	surface_glycoprotein	Mesocricetus auratus	Homo sapiens	Coronaviridae_12	Coronaviridae	TRUE	-0.689482	1579	Entry
Node1473	OK426790.1	1248	nucleocapsid_phosphoprotein	Mesocricetus auratus	Homo sapiens	Coronaviridae_12	Coronaviridae	TRUE	-0.13201	1579	Structural
Node1473	OK426790.1	13119	ORF1a_polyprotein	Mesocricetus auratus	Homo sapiens	Coronaviridae_12	Coronaviridae	TRUE	-0.57259	1579	Replication-associated
Node1473	OK426790.1	21189	ORF1ab_polyprotein	Mesocricetus auratus	Homo sapiens	Coronaviridae_12	Coronaviridae	TRUE	-0.27054	1579	Replication-associated
Node1473	OK426910.1	1248	nucleocapsid_phosphoprotein	Mesocricetus auratus	Homo sapiens	Coronaviridae_12	Coronaviridae	TRUE	0.283054	1579	Structural
Node1473	OK426910.1	21192	ORF1ab_polyprotein	Mesocricetus auratus	Homo sapiens	Coronaviridae_12	Coronaviridae	TRUE	-0.571684	1579	Replication-associated
Node1473	OK427187.1	1248	nucleocapsid_phosphoprotein	Mesocricetus auratus	Homo sapiens	Coronaviridae_12	Coronaviridae	TRUE	-0.126934	1579	Structural
Node1473	OK427187.1	13122	ORF1a_polyprotein	Mesocricetus auratus	Homo sapiens	Coronaviridae_12	Coronaviridae	TRUE	-0.326189	1579	Replication-associated
Node1473	OK427187.1	21192	ORF1ab_polyprotein	Mesocricetus auratus	Homo sapiens	Coronaviridae_12	Coronaviridae	TRUE	-0.172412	1579	Replication-associated
Node1473	OK433505.1	1248	nucleocapsid_phosphoprotein	Mesocricetus auratus	Homo sapiens	Coronaviridae_12	Coronaviridae	TRUE	0.0638331	1579	Structural
Node1473	OK433505.1	13125	ORF1a_polyprotein	Mesocricetus auratus	Homo sapiens	Coronaviridae_12	Coronaviridae	TRUE	-0.395185	1579	Replication-associated
Node1473	OK433505.1	21195	ORF1ab_polyprotein	Mesocricetus auratus	Homo sapiens	Coronaviridae_12	Coronaviridae	TRUE	-0.496293	1579	Replication-associated
Node1473	OK433580.1	1248	nucleocapsid_phosphoprotein	Mesocricetus auratus	Homo sapiens	Coronaviridae_12	Coronaviridae	TRUE	-0.0232653	1579	Structural
Node1473	OK433580.1	13125	ORF1a_polyprotein	Mesocricetus auratus	Homo sapiens	Coronaviridae_12	Coronaviridae	TRUE	-0.131036	1579	Replication-associated
Node1473	OK433580.1	21195	ORF1ab_polyprotein	Mesocricetus auratus	Homo sapiens	Coronaviridae_12	Coronaviridae	TRUE	-0.473689	1579	Replication-associated
Node1473	OK435304.1	13125	ORF1a_polyprotein	Mesocricetus auratus	Homo sapiens	Coronaviridae_12	Coronaviridae	TRUE	0.330609	1579	Replication-associated
Node1473	OK435304.1	21195	ORF1ab_polyprotein	Mesocricetus auratus	Homo sapiens	Coronaviridae_12	Coronaviridae	TRUE	0.206535	1579	Replication-associated
Node1473	OK435342.1	21195	ORF1ab_polyprotein	Mesocricetus auratus	Homo sapiens	Coronaviridae_12	Coronaviridae	TRUE	-0.270558	1579	Replication-associated
Node1473	OK435597.1	13011	ORF1a_polyprotein	Mesocricetus auratus	Homo sapiens	Coronaviridae_12	Coronaviridae	TRUE	0.0296472	1579	Replication-associated
Node1473	OK435597.1	21063	ORF1ab_polyprotein	Mesocricetus auratus	Homo sapiens	Coronaviridae_12	Coronaviridae	TRUE	0.206543	1579	Replication-associated
Node1473	OK435624.1	21072	ORF1ab_polyprotein	Mesocricetus auratus	Homo sapiens	Coronaviridae_12	Coronaviridae	TRUE	-0.270382	1579	Replication-associated
Node1473	OK435727.1	13125	ORF1a_polyprotein	Mesocricetus auratus	Homo sapiens	Coronaviridae_12	Coronaviridae	TRUE	-0.0249191	1579	Replication-associated
Node1473	OK435727.1	21195	ORF1ab_polyprotein	Mesocricetus auratus	Homo sapiens	Coronaviridae_12	Coronaviridae	TRUE	-0.0924163	1579	Replication-associated
Node1473	OK487879.1	1248	nucleocapsid_phosphoprotein	Mesocricetus auratus	Homo sapiens	Coronaviridae_12	Coronaviridae	TRUE	-0.0232653	1579	Structural
Node1473	OK487879.1	13125	ORF1a_polyprotein	Mesocricetus auratus	Homo sapiens	Coronaviridae_12	Coronaviridae	TRUE	0.188315	1579	Replication-associated
Node1473	OK487879.1	21195	ORF1ab_polyprotein	Mesocricetus auratus	Homo sapiens	Coronaviridae_12	Coronaviridae	TRUE	-0.0796978	1579	Replication-associated
Node1473	OK488043.1	1248	nucleocapsid_phosphoprotein	Mesocricetus auratus	Homo sapiens	Coronaviridae_12	Coronaviridae	TRUE	-0.166463	1579	Structural
Node1473	OK488043.1	13125	ORF1a_polyprotein	Mesocricetus auratus	Homo sapiens	Coronaviridae_12	Coronaviridae	TRUE	0.0832527	1579	Replication-associated
Node1473	OK488043.1	21195	ORF1ab_polyprotein	Mesocricetus auratus	Homo sapiens	Coronaviridae_12	Coronaviridae	TRUE	-0.171722	1579	Replication-associated
Node1473	OK488053.1	1248	nucleocapsid_phosphoprotein	Mesocricetus auratus	Homo sapiens	Coronaviridae_12	Coronaviridae	TRUE	-0.0232653	1579	Structural
Node1473	OK488053.1	13125	ORF1a_polyprotein	Mesocricetus auratus	Homo sapiens	Coronaviridae_12	Coronaviridae	TRUE	-0.484515	1579	Replication-associated
Node1473	OK488053.1	21195	ORF1ab_polyprotein	Mesocricetus auratus	Homo sapiens	Coronaviridae_12	Coronaviridae	TRUE	-0.587034	1579	Replication-associated
Node1473	OK488065.1	1248	nucleocapsid_phosphoprotein	Mesocricetus auratus	Homo sapiens	Coronaviridae_12	Coronaviridae	TRUE	-0.0232653	1579	Structural
Node1473	OK488065.1	13125	ORF1a_polyprotein	Mesocricetus auratus	Homo sapiens	Coronaviridae_12	Coronaviridae	TRUE	-0.209967	1579	Replication-associated
Node1473	OK488065.1	21195	ORF1ab_polyprotein	Mesocricetus auratus	Homo sapiens	Coronaviridae_12	Coronaviridae	TRUE	-0.348924	1579	Replication-associated
Node1473	OK537994.1	13125	ORF1a_polyprotein	Mesocricetus auratus	Homo sapiens	Coronaviridae_12	Coronaviridae	TRUE	-0.422188	1579	Replication-associated
Node1473	OK537994.1	21195	ORF1ab_polyprotein	Mesocricetus auratus	Homo sapiens	Coronaviridae_12	Coronaviridae	TRUE	-0.276521	1579	Replication-associated
Node1473	OK537994.1	828	ORF3a_protein	Mesocricetus auratus	Homo sapiens	Coronaviridae_12	Coronaviridae	TRUE	-0.0342815	1579	Auxiliary
Node1473	OK538033.1	21195	ORF1ab_polyprotein	Mesocricetus auratus	Homo sapiens	Coronaviridae_12	Coronaviridae	TRUE	-0.328388	1579	Replication-associated
Node1473	OK548575.1	1191	nucleocapsid_phosphoprotein	Mesocricetus auratus	Homo sapiens	Coronaviridae_12	Coronaviridae	TRUE	-0.046724	1579	Structural
Node1473	OK548575.1	13125	ORF1a_polyprotein	Mesocricetus auratus	Homo sapiens	Coronaviridae_12	Coronaviridae	TRUE	0.506863	1579	Replication-associated
Node1473	OK548575.1	21195	ORF1ab_polyprotein	Mesocricetus auratus	Homo sapiens	Coronaviridae_12	Coronaviridae	TRUE	-0.296352	1579	Replication-associated
Node1473	OK548834.1	1248	nucleocapsid_phosphoprotein	Mesocricetus auratus	Homo sapiens	Coronaviridae_12	Coronaviridae	TRUE	-0.266782	1579	Structural
Node1473	OK548834.1	13125	ORF1a_polyprotein	Mesocricetus auratus	Homo sapiens	Coronaviridae_12	Coronaviridae	TRUE	-0.307426	1579	Replication-associated
Node1473	OK548834.1	21195	ORF1ab_polyprotein	Mesocricetus auratus	Homo sapiens	Coronaviridae_12	Coronaviridae	TRUE	-0.130789	1579	Replication-associated
Node1473	OK548834.1	3666	surface_glycoprotein	Mesocricetus auratus	Homo sapiens	Coronaviridae_12	Coronaviridae	TRUE	0.311304	1579	Entry
Node1473	OK549216.1	21102	ORF1ab_polyprotein	Mesocricetus auratus	Homo sapiens	Coronaviridae_12	Coronaviridae	TRUE	-0.872719	1579	Replication-associated
Node1473	OK549216.1	3702	surface_glycoprotein	Mesocricetus auratus	Homo sapiens	Coronaviridae_12	Coronaviridae	TRUE	-0.269828	1579	Entry
Node1473	OK549352.1	21195	ORF1ab_polyprotein	Mesocricetus auratus	Homo sapiens	Coronaviridae_12	Coronaviridae	TRUE	-0.270558	1579	Replication-associated
Node1473	OL332396.1	13125	ORF1a_polyprotein	Mesocricetus auratus	Homo sapiens	Coronaviridae_12	Coronaviridae	TRUE	-0.186515	1579	Replication-associated
Node1473	OL332396.1	21195	ORF1ab_polyprotein	Mesocricetus auratus	Homo sapiens	Coronaviridae_12	Coronaviridae	TRUE	-0.0790431	1579	Replication-associated
Node1473	OL351370.1	669	membrane_glycoprotein	Mesocricetus auratus	Homo sapiens	Coronaviridae_12	Coronaviridae	TRUE	-0.266643	1579	Structural
Node1473	OL351370.1	1248	nucleocapsid_phosphoprotein	Mesocricetus auratus	Homo sapiens	Coronaviridae_12	Coronaviridae	TRUE	0.254101	1579	Structural
Node1473	OL351370.1	13125	ORF1a_polyprotein	Mesocricetus auratus	Homo sapiens	Coronaviridae_12	Coronaviridae	TRUE	0.183702	1579	Replication-associated
Node1473	OL351370.1	21195	ORF1ab_polyprotein	Mesocricetus auratus	Homo sapiens	Coronaviridae_12	Coronaviridae	TRUE	-0.0542554	1579	Replication-associated
Node1473	OL351370.1	366	ORF7a_protein	Mesocricetus auratus	Homo sapiens	Coronaviridae_12	Coronaviridae	TRUE	0.297102	1579	Auxiliary
Node1473	OL351370.1	3702	surface_glycoprotein	Mesocricetus auratus	Homo sapiens	Coronaviridae_12	Coronaviridae	TRUE	-0.26814	1579	Entry
Node1473	OL442143.1	1248	nucleocapsid_phosphoprotein	Mesocricetus auratus	Homo sapiens	Coronaviridae_12	Coronaviridae	TRUE	-0.018623	1579	Structural
Node1473	OL442143.1	13125	ORF1a_polyprotein	Mesocricetus auratus	Homo sapiens	Coronaviridae_12	Coronaviridae	TRUE	-0.572737	1579	Replication-associated
Node1473	OL442143.1	21195	ORF1ab_polyprotein	Mesocricetus auratus	Homo sapiens	Coronaviridae_12	Coronaviridae	TRUE	-0.306773	1579	Replication-associated
Node1473	OL442151.1	1248	nucleocapsid_phosphoprotein	Mesocricetus auratus	Homo sapiens	Coronaviridae_12	Coronaviridae	TRUE	-0.018623	1579	Structural
Node1473	OL442151.1	13104	ORF1a_polyprotein	Mesocricetus auratus	Homo sapiens	Coronaviridae_12	Coronaviridae	TRUE	-0.572556	1579	Replication-associated
Node1473	OL442151.1	21174	ORF1ab_polyprotein	Mesocricetus auratus	Homo sapiens	Coronaviridae_12	Coronaviridae	TRUE	-0.0943955	1579	Replication-associated
Node1473	OL461277.1	1248	nucleocapsid_phosphoprotein	Mesocricetus auratus	Homo sapiens	Coronaviridae_12	Coronaviridae	TRUE	-0.0232653	1579	Structural
Node1473	OL461277.1	13125	ORF1a_polyprotein	Mesocricetus auratus	Homo sapiens	Coronaviridae_12	Coronaviridae	TRUE	0.00313545	1579	Replication-associated
Node1473	OL461277.1	21195	ORF1ab_polyprotein	Mesocricetus auratus	Homo sapiens	Coronaviridae_12	Coronaviridae	TRUE	-0.292035	1579	Replication-associated
Node1473	OL461281.1	1248	nucleocapsid_phosphoprotein	Mesocricetus auratus	Homo sapiens	Coronaviridae_12	Coronaviridae	TRUE	-0.0232653	1579	Structural
Node1473	OL461281.1	13125	ORF1a_polyprotein	Mesocricetus auratus	Homo sapiens	Coronaviridae_12	Coronaviridae	TRUE	-0.173051	1579	Replication-associated
Node1473	OL461281.1	21195	ORF1ab_polyprotein	Mesocricetus auratus	Homo sapiens	Coronaviridae_12	Coronaviridae	TRUE	-0.371242	1579	Replication-associated
Node1473	OL461286.1	1248	nucleocapsid_phosphoprotein	Mesocricetus auratus	Homo sapiens	Coronaviridae_12	Coronaviridae	TRUE	-0.0232653	1579	Structural
Node1473	OL461286.1	13122	ORF1a_polyprotein	Mesocricetus auratus	Homo sapiens	Coronaviridae_12	Coronaviridae	TRUE	-0.131036	1579	Replication-associated
Node1473	OL461286.1	21189	ORF1ab_polyprotein	Mesocricetus auratus	Homo sapiens	Coronaviridae_12	Coronaviridae	TRUE	-0.540719	1579	Replication-associated
Node1473	OL461312.1	1248	nucleocapsid_phosphoprotein	Mesocricetus auratus	Homo sapiens	Coronaviridae_12	Coronaviridae	TRUE	-0.166463	1579	Structural
Node1473	OL461312.1	13047	ORF1a_polyprotein	Mesocricetus auratus	Homo sapiens	Coronaviridae_12	Coronaviridae	TRUE	-0.28911	1579	Replication-associated
Node1473	OL461312.1	21117	ORF1ab_polyprotein	Mesocricetus auratus	Homo sapiens	Coronaviridae_12	Coronaviridae	TRUE	-0.328201	1579	Replication-associated
Node1473	OL546820.1	1248	nucleocapsid_phosphoprotein	Mesocricetus auratus	Homo sapiens	Coronaviridae_12	Coronaviridae	TRUE	0.0455788	1579	Structural
Node1473	OL546820.1	13125	ORF1a_polyprotein	Mesocricetus auratus	Homo sapiens	Coronaviridae_12	Coronaviridae	TRUE	-0.307227	1579	Replication-associated
Node1473	OL546820.1	21195	ORF1ab_polyprotein	Mesocricetus auratus	Homo sapiens	Coronaviridae_12	Coronaviridae	TRUE	-0.383505	1579	Replication-associated
Node1473	OL548859.1	1248	nucleocapsid_phosphoprotein	Mesocricetus auratus	Homo sapiens	Coronaviridae_12	Coronaviridae	TRUE	-0.0232653	1579	Structural
Node1473	OL548859.1	13113	ORF1a_polyprotein	Mesocricetus auratus	Homo sapiens	Coronaviridae_12	Coronaviridae	TRUE	-0.0250334	1579	Replication-associated
Node1473	OL548859.1	21183	ORF1ab_polyprotein	Mesocricetus auratus	Homo sapiens	Coronaviridae_12	Coronaviridae	TRUE	-0.503293	1579	Replication-associated
Node1473	OL601629.1	1248	nucleocapsid_phosphoprotein	Mesocricetus auratus	Homo sapiens	Coronaviridae_12	Coronaviridae	TRUE	-0.018623	1579	Structural
Node1473	OL601629.1	13125	ORF1a_polyprotein	Mesocricetus auratus	Homo sapiens	Coronaviridae_12	Coronaviridae	TRUE	-0.388684	1579	Replication-associated
Node1473	OL601629.1	21195	ORF1ab_polyprotein	Mesocricetus auratus	Homo sapiens	Coronaviridae_12	Coronaviridae	TRUE	-0.0250447	1579	Replication-associated
Node1473	OL601731.1	1245	nucleocapsid_phosphoprotein	Mesocricetus auratus	Homo sapiens	Coronaviridae_12	Coronaviridae	TRUE	-0.0181923	1579	Structural
Node1473	OL601731.1	13125	ORF1a_polyprotein	Mesocricetus auratus	Homo sapiens	Coronaviridae_12	Coronaviridae	TRUE	-1.05012	1579	Replication-associated
Node1473	OL601731.1	21195	ORF1ab_polyprotein	Mesocricetus auratus	Homo sapiens	Coronaviridae_12	Coronaviridae	TRUE	-0.748048	1579	Replication-associated
Node1473	OL601731.1	3705	surface_glycoprotein	Mesocricetus auratus	Homo sapiens	Coronaviridae_12	Coronaviridae	TRUE	0.473101	1579	Entry
Node1473	OL601826.1	1248	nucleocapsid_phosphoprotein	Mesocricetus auratus	Homo sapiens	Coronaviridae_12	Coronaviridae	TRUE	-0.0232653	1579	Structural
Node1473	OL601826.1	13125	ORF1a_polyprotein	Mesocricetus auratus	Homo sapiens	Coronaviridae_12	Coronaviridae	TRUE	0.0600939	1579	Replication-associated
Node1473	OL601826.1	21195	ORF1ab_polyprotein	Mesocricetus auratus	Homo sapiens	Coronaviridae_12	Coronaviridae	TRUE	-0.17159	1579	Replication-associated
Node1473	OL709467.1	13122	ORF1a_polyprotein	Mesocricetus auratus	Homo sapiens	Coronaviridae_12	Coronaviridae	TRUE	-0.13118	1579	Replication-associated
Node1473	OL709467.1	21192	ORF1ab_polyprotein	Mesocricetus auratus	Homo sapiens	Coronaviridae_12	Coronaviridae	TRUE	-0.172598	1579	Replication-associated
Node1473	OL719093.1	1248	nucleocapsid_phosphoprotein	Mesocricetus auratus	Homo sapiens	Coronaviridae_12	Coronaviridae	TRUE	0.00923533	1579	Structural
Node1473	OL719093.1	13122	ORF1a_polyprotein	Mesocricetus auratus	Homo sapiens	Coronaviridae_12	Coronaviridae	TRUE	0.14184	1579	Replication-associated
Node1473	OL719093.1	21192	ORF1ab_polyprotein	Mesocricetus auratus	Homo sapiens	Coronaviridae_12	Coronaviridae	TRUE	0.24308	1579	Replication-associated
Node1473	OL719093.1	3705	surface_glycoprotein	Mesocricetus auratus	Homo sapiens	Coronaviridae_12	Coronaviridae	TRUE	-0.0177864	1579	Entry
Node1473	OL719127.1	13125	ORF1a_polyprotein	Mesocricetus auratus	Homo sapiens	Coronaviridae_12	Coronaviridae	TRUE	0.170183	1579	Replication-associated
Node1473	OL719127.1	21195	ORF1ab_polyprotein	Mesocricetus auratus	Homo sapiens	Coronaviridae_12	Coronaviridae	TRUE	0.149628	1579	Replication-associated
Node1473	OL774396.1	669	membrane_glycoprotein	Mesocricetus auratus	Homo sapiens	Coronaviridae_12	Coronaviridae	TRUE	-0.266643	1579	Structural
Node1473	OL774396.1	13089	ORF1a_polyprotein	Mesocricetus auratus	Homo sapiens	Coronaviridae_12	Coronaviridae	TRUE	-0.0370523	1579	Replication-associated
Node1473	OL774396.1	21159	ORF1ab_polyprotein	Mesocricetus auratus	Homo sapiens	Coronaviridae_12	Coronaviridae	TRUE	0.106318	1579	Replication-associated
Node1473	OL774396.1	366	ORF7a_protein	Mesocricetus auratus	Homo sapiens	Coronaviridae_12	Coronaviridae	TRUE	-0.329123	1579	Auxiliary
Node1473	OL774396.1	3705	surface_glycoprotein	Mesocricetus auratus	Homo sapiens	Coronaviridae_12	Coronaviridae	TRUE	0.495412	1579	Entry
Node1473	OL779264.1	13122	ORF1a_polyprotein	Mesocricetus auratus	Homo sapiens	Coronaviridae_12	Coronaviridae	TRUE	-0.258934	1579	Replication-associated
Node1473	OL779264.1	21192	ORF1ab_polyprotein	Mesocricetus auratus	Homo sapiens	Coronaviridae_12	Coronaviridae	TRUE	0.0288629	1579	Replication-associated
Node1473	OL779696.1	13125	ORF1a_polyprotein	Mesocricetus auratus	Homo sapiens	Coronaviridae_12	Coronaviridae	TRUE	-0.0588316	1579	Replication-associated
Node1473	OL779696.1	21195	ORF1ab_polyprotein	Mesocricetus auratus	Homo sapiens	Coronaviridae_12	Coronaviridae	TRUE	0.267541	1579	Replication-associated
Node1473	OL779696.1	3699	surface_glycoprotein	Mesocricetus auratus	Homo sapiens	Coronaviridae_12	Coronaviridae	TRUE	0.31169	1579	Entry
Node1473	OL790171.1	1248	nucleocapsid_phosphoprotein	Mesocricetus auratus	Homo sapiens	Coronaviridae_12	Coronaviridae	TRUE	-0.31941	1579	Structural
Node1473	OL790171.1	13125	ORF1a_polyprotein	Mesocricetus auratus	Homo sapiens	Coronaviridae_12	Coronaviridae	TRUE	-0.099994	1579	Replication-associated
Node1473	OL790171.1	21195	ORF1ab_polyprotein	Mesocricetus auratus	Homo sapiens	Coronaviridae_12	Coronaviridae	TRUE	-0.300457	1579	Replication-associated
Node1473	OL790171.1	3702	surface_glycoprotein	Mesocricetus auratus	Homo sapiens	Coronaviridae_12	Coronaviridae	TRUE	0.132257	1579	Entry
Node1473	OL801329.1	1248	nucleocapsid_phosphoprotein	Mesocricetus auratus	Homo sapiens	Coronaviridae_12	Coronaviridae	TRUE	0.253789	1579	Structural
Node1473	OL801329.1	13053	ORF1a_polyprotein	Mesocricetus auratus	Homo sapiens	Coronaviridae_12	Coronaviridae	TRUE	0.227175	1579	Replication-associated
Node1473	OL801329.1	21123	ORF1ab_polyprotein	Mesocricetus auratus	Homo sapiens	Coronaviridae_12	Coronaviridae	TRUE	0.472208	1579	Replication-associated
Node1473	OL803716.1	1248	nucleocapsid_phosphoprotein	Mesocricetus auratus	Homo sapiens	Coronaviridae_12	Coronaviridae	TRUE	-0.491856	1579	Structural
Node1473	OL803716.1	13125	ORF1a_polyprotein	Mesocricetus auratus	Homo sapiens	Coronaviridae_12	Coronaviridae	TRUE	-0.322029	1579	Replication-associated
Node1473	OL803716.1	21192	ORF1ab_polyprotein	Mesocricetus auratus	Homo sapiens	Coronaviridae_12	Coronaviridae	TRUE	-0.314615	1579	Replication-associated
Node1473	OL825922.1	21114	ORF1ab_polyprotein	Mesocricetus auratus	Homo sapiens	Coronaviridae_12	Coronaviridae	TRUE	0.498897	1579	Replication-associated
Node1473	OL892663.1	1248	nucleocapsid_phosphoprotein	Mesocricetus auratus	Homo sapiens	Coronaviridae_12	Coronaviridae	TRUE	-0.160031	1579	Structural
Node1473	OL892663.1	13125	ORF1a_polyprotein	Mesocricetus auratus	Homo sapiens	Coronaviridae_12	Coronaviridae	TRUE	0.179108	1579	Replication-associated
Node1473	OL892663.1	21192	ORF1ab_polyprotein	Mesocricetus auratus	Homo sapiens	Coronaviridae_12	Coronaviridae	TRUE	0.188963	1579	Replication-associated
Node1473	OL899742.1	13125	ORF1a_polyprotein	Mesocricetus auratus	Homo sapiens	Coronaviridae_12	Coronaviridae	TRUE	-0.131049	1579	Replication-associated
Node1473	OL899742.1	21195	ORF1ab_polyprotein	Mesocricetus auratus	Homo sapiens	Coronaviridae_12	Coronaviridae	TRUE	-0.0265891	1579	Replication-associated
Node1473	OL899742.1	3699	surface_glycoprotein	Mesocricetus auratus	Homo sapiens	Coronaviridae_12	Coronaviridae	TRUE	-0.13951	1579	Entry
Node1473	OL958511.1	13125	ORF1a_polyprotein	Mesocricetus auratus	Homo sapiens	Coronaviridae_12	Coronaviridae	TRUE	0.205948	1579	Replication-associated
Node1473	OL958511.1	21195	ORF1ab_polyprotein	Mesocricetus auratus	Homo sapiens	Coronaviridae_12	Coronaviridae	TRUE	-0.0168068	1579	Replication-associated
Node1473	OL958511.1	828	ORF3a_protein	Mesocricetus auratus	Homo sapiens	Coronaviridae_12	Coronaviridae	TRUE	-0.28067	1579	Auxiliary
Node1473	OL958511.1	3705	surface_glycoprotein	Mesocricetus auratus	Homo sapiens	Coronaviridae_12	Coronaviridae	TRUE	0.337821	1579	Entry
Node1473	OL962766.1	1245	nucleocapsid_phosphoprotein	Mesocricetus auratus	Homo sapiens	Coronaviridae_12	Coronaviridae	TRUE	0.255463	1579	Structural
Node1473	OL962766.1	13125	ORF1a_polyprotein	Mesocricetus auratus	Homo sapiens	Coronaviridae_12	Coronaviridae	TRUE	0.0324412	1579	Replication-associated
Node1473	OL962766.1	21195	ORF1ab_polyprotein	Mesocricetus auratus	Homo sapiens	Coronaviridae_12	Coronaviridae	TRUE	0.208175	1579	Replication-associated
Node1473	OL962766.1	366	ORF7a_protein	Mesocricetus auratus	Homo sapiens	Coronaviridae_12	Coronaviridae	TRUE	-0.329123	1579	Auxiliary
Node1473	OL983369.1	1248	nucleocapsid_phosphoprotein	Mesocricetus auratus	Homo sapiens	Coronaviridae_12	Coronaviridae	TRUE	-0.246771	1579	Structural
Node1473	OL983369.1	13095	ORF1a_polyprotein	Mesocricetus auratus	Homo sapiens	Coronaviridae_12	Coronaviridae	TRUE	-0.00596828	1579	Replication-associated
Node1473	OL983369.1	21165	ORF1ab_polyprotein	Mesocricetus auratus	Homo sapiens	Coronaviridae_12	Coronaviridae	TRUE	0.333297	1579	Replication-associated
Node1473	OM062505.1	21183	ORF1ab_polyprotein	Mesocricetus auratus	Homo sapiens	Coronaviridae_12	Coronaviridae	TRUE	-0.124418	1579	Replication-associated
Node1473	OM062505.1	828	ORF3a_protein	Mesocricetus auratus	Homo sapiens	Coronaviridae_12	Coronaviridae	TRUE	-0.281532	1579	Auxiliary
Node1473	OM062505.1	3702	surface_glycoprotein	Mesocricetus auratus	Homo sapiens	Coronaviridae_12	Coronaviridae	TRUE	-0.648015	1579	Entry
Node1473	OM062551.1	21072	ORF1ab_polyprotein	Mesocricetus auratus	Homo sapiens	Coronaviridae_12	Coronaviridae	TRUE	0.428442	1579	Replication-associated
Node1473	OM062551.1	3702	surface_glycoprotein	Mesocricetus auratus	Homo sapiens	Coronaviridae_12	Coronaviridae	TRUE	-0.648015	1579	Entry
Node1473	OM127692.1	669	membrane_glycoprotein	Mesocricetus auratus	Homo sapiens	Coronaviridae_12	Coronaviridae	TRUE	-0.265973	1579	Structural
Node1473	OM127692.1	1212	nucleocapsid_phosphoprotein	Mesocricetus auratus	Homo sapiens	Coronaviridae_12	Coronaviridae	TRUE	0.140278	1579	Structural
Node1473	OM127692.1	13125	ORF1a_polyprotein	Mesocricetus auratus	Homo sapiens	Coronaviridae_12	Coronaviridae	TRUE	0.264069	1579	Replication-associated
Node1473	OM127692.1	21189	ORF1ab_polyprotein	Mesocricetus auratus	Homo sapiens	Coronaviridae_12	Coronaviridae	TRUE	0.282412	1579	Replication-associated
Node1473	OM127692.1	366	ORF7a_protein	Mesocricetus auratus	Homo sapiens	Coronaviridae_12	Coronaviridae	TRUE	-0.155153	1579	Auxiliary
Node1473	OM180030.1	13125	ORF1a_polyprotein	Mesocricetus auratus	Homo sapiens	Coronaviridae_12	Coronaviridae	TRUE	0.00312348	1579	Replication-associated
Node1473	OM180030.1	21195	ORF1ab_polyprotein	Mesocricetus auratus	Homo sapiens	Coronaviridae_12	Coronaviridae	TRUE	0.282417	1579	Replication-associated
Node1473	OM180067.1	13113	ORF1a_polyprotein	Mesocricetus auratus	Homo sapiens	Coronaviridae_12	Coronaviridae	TRUE	-0.289475	1579	Replication-associated
Node1473	OM180067.1	21180	ORF1ab_polyprotein	Mesocricetus auratus	Homo sapiens	Coronaviridae_12	Coronaviridae	TRUE	-0.106351	1579	Replication-associated
Node1473	OM180410.1	13122	ORF1a_polyprotein	Mesocricetus auratus	Homo sapiens	Coronaviridae_12	Coronaviridae	TRUE	0.346408	1579	Replication-associated
Node1473	OM180410.1	21192	ORF1ab_polyprotein	Mesocricetus auratus	Homo sapiens	Coronaviridae_12	Coronaviridae	TRUE	0.37593	1579	Replication-associated
Node1473	OM180410.1	366	ORF7a_protein	Mesocricetus auratus	Homo sapiens	Coronaviridae_12	Coronaviridae	TRUE	-0.329123	1579	Auxiliary
Node1473	OM182165.1	1248	nucleocapsid_phosphoprotein	Mesocricetus auratus	Homo sapiens	Coronaviridae_12	Coronaviridae	TRUE	0.0673628	1579	Structural
Node1473	OM182165.1	13125	ORF1a_polyprotein	Mesocricetus auratus	Homo sapiens	Coronaviridae_12	Coronaviridae	TRUE	-0.00602272	1579	Replication-associated
Node1473	OM182165.1	21195	ORF1ab_polyprotein	Mesocricetus auratus	Homo sapiens	Coronaviridae_12	Coronaviridae	TRUE	0.10619	1579	Replication-associated
Node1473	OM190769.1	669	membrane_glycoprotein	Mesocricetus auratus	Homo sapiens	Coronaviridae_12	Coronaviridae	TRUE	-0.265973	1579	Structural
Node1473	OM190769.1	13125	ORF1a_polyprotein	Mesocricetus auratus	Homo sapiens	Coronaviridae_12	Coronaviridae	TRUE	0.194409	1579	Replication-associated
Node1473	OM190769.1	21192	ORF1ab_polyprotein	Mesocricetus auratus	Homo sapiens	Coronaviridae_12	Coronaviridae	TRUE	0.161687	1579	Replication-associated
Node1473	OM190769.1	3705	surface_glycoprotein	Mesocricetus auratus	Homo sapiens	Coronaviridae_12	Coronaviridae	TRUE	-0.19275	1579	Entry
Node1473	OM212470.1	1248	nucleocapsid_phosphoprotein	Mesocricetus auratus	Homo sapiens	Coronaviridae_12	Coronaviridae	TRUE	-0.266782	1579	Structural
Node1473	OM212470.1	13125	ORF1a_polyprotein	Mesocricetus auratus	Homo sapiens	Coronaviridae_12	Coronaviridae	TRUE	-0.223485	1579	Replication-associated
Node1473	OM212470.1	21195	ORF1ab_polyprotein	Mesocricetus auratus	Homo sapiens	Coronaviridae_12	Coronaviridae	TRUE	-0.0866896	1579	Replication-associated
Node1473	OM212470.1	3693	surface_glycoprotein	Mesocricetus auratus	Homo sapiens	Coronaviridae_12	Coronaviridae	TRUE	0.0757737	1579	Entry
Node1473	OM281653.1	1251	nucleocapsid_phosphoprotein	Mesocricetus auratus	Homo sapiens	Coronaviridae_12	Coronaviridae	TRUE	0.175991	1579	Structural
Node1473	OM281653.1	13119	ORF1a_polyprotein	Mesocricetus auratus	Homo sapiens	Coronaviridae_12	Coronaviridae	TRUE	-0.321882	1579	Replication-associated
Node1473	OM281653.1	21189	ORF1ab_polyprotein	Mesocricetus auratus	Homo sapiens	Coronaviridae_12	Coronaviridae	TRUE	-0.217636	1579	Replication-associated
Node1473	OM281653.1	3480	surface_glycoprotein	Mesocricetus auratus	Homo sapiens	Coronaviridae_12	Coronaviridae	TRUE	1.04005	1579	Entry
Node1473	OM319586.1	1248	nucleocapsid_phosphoprotein	Mesocricetus auratus	Homo sapiens	Coronaviridae_12	Coronaviridae	TRUE	0.345421	1579	Structural
Node1473	OM319586.1	13125	ORF1a_polyprotein	Mesocricetus auratus	Homo sapiens	Coronaviridae_12	Coronaviridae	TRUE	0.0419933	1579	Replication-associated
Node1473	OM319586.1	21195	ORF1ab_polyprotein	Mesocricetus auratus	Homo sapiens	Coronaviridae_12	Coronaviridae	TRUE	0.135615	1579	Replication-associated
Node1473	OM319586.1	3705	surface_glycoprotein	Mesocricetus auratus	Homo sapiens	Coronaviridae_12	Coronaviridae	TRUE	0.41285	1579	Entry
Node1473	OM319589.1	1248	nucleocapsid_phosphoprotein	Mesocricetus auratus	Homo sapiens	Coronaviridae_12	Coronaviridae	TRUE	0.345421	1579	Structural
Node1473	OM319589.1	13125	ORF1a_polyprotein	Mesocricetus auratus	Homo sapiens	Coronaviridae_12	Coronaviridae	TRUE	0.0823179	1579	Replication-associated
Node1473	OM319589.1	21195	ORF1ab_polyprotein	Mesocricetus auratus	Homo sapiens	Coronaviridae_12	Coronaviridae	TRUE	0.163177	1579	Replication-associated
Node1473	OM319589.1	366	ORF7a_protein	Mesocricetus auratus	Homo sapiens	Coronaviridae_12	Coronaviridae	TRUE	0.0451001	1579	Auxiliary
Node1473	OM319589.1	3705	surface_glycoprotein	Mesocricetus auratus	Homo sapiens	Coronaviridae_12	Coronaviridae	TRUE	0.41285	1579	Entry
Node1473	OM327526.1	1251	nucleocapsid_phosphoprotein	Mesocricetus auratus	Homo sapiens	Coronaviridae_12	Coronaviridae	TRUE	0.175991	1579	Structural
Node1473	OM327526.1	13119	ORF1a_polyprotein	Mesocricetus auratus	Homo sapiens	Coronaviridae_12	Coronaviridae	TRUE	-0.234084	1579	Replication-associated
Node1473	OM327526.1	21189	ORF1ab_polyprotein	Mesocricetus auratus	Homo sapiens	Coronaviridae_12	Coronaviridae	TRUE	-0.175154	1579	Replication-associated
Node1473	OM327526.1	3702	surface_glycoprotein	Mesocricetus auratus	Homo sapiens	Coronaviridae_12	Coronaviridae	TRUE	0.844503	1579	Entry
Node1473	OM345241.1	13125	ORF1a_polyprotein	Mesocricetus auratus	Homo sapiens	Coronaviridae_12	Coronaviridae	TRUE	-0.748993	1579	Replication-associated
Node1473	OM345241.1	21195	ORF1ab_polyprotein	Mesocricetus auratus	Homo sapiens	Coronaviridae_12	Coronaviridae	TRUE	-0.446818	1579	Replication-associated
Node1473	OM373110.1	13125	ORF1a_polyprotein	Mesocricetus auratus	Homo sapiens	Coronaviridae_12	Coronaviridae	TRUE	0.0662468	1579	Replication-associated
Node1473	OM373110.1	21195	ORF1ab_polyprotein	Mesocricetus auratus	Homo sapiens	Coronaviridae_12	Coronaviridae	TRUE	0.304932	1579	Replication-associated
Node1473	OM540528.1	13125	ORF1a_polyprotein	Mesocricetus auratus	Homo sapiens	Coronaviridae_12	Coronaviridae	TRUE	-0.171049	1579	Replication-associated
Node1473	OM540528.1	21195	ORF1ab_polyprotein	Mesocricetus auratus	Homo sapiens	Coronaviridae_12	Coronaviridae	TRUE	-0.0120439	1579	Replication-associated
Node1473	OM540528.1	3699	surface_glycoprotein	Mesocricetus auratus	Homo sapiens	Coronaviridae_12	Coronaviridae	TRUE	0.31169	1579	Entry
Node1473	OM540783.1	1248	nucleocapsid_phosphoprotein	Mesocricetus auratus	Homo sapiens	Coronaviridae_12	Coronaviridae	TRUE	-0.018623	1579	Structural
Node1473	OM540783.1	13125	ORF1a_polyprotein	Mesocricetus auratus	Homo sapiens	Coronaviridae_12	Coronaviridae	TRUE	0.131131	1579	Replication-associated
Node1473	OM540783.1	21195	ORF1ab_polyprotein	Mesocricetus auratus	Homo sapiens	Coronaviridae_12	Coronaviridae	TRUE	0.461989	1579	Replication-associated
Node1473	OM640226.1	1248	nucleocapsid_phosphoprotein	Mesocricetus auratus	Homo sapiens	Coronaviridae_12	Coronaviridae	TRUE	0.17601	1579	Structural
Node1473	OM640226.1	13074	ORF1a_polyprotein	Mesocricetus auratus	Homo sapiens	Coronaviridae_12	Coronaviridae	TRUE	-0.309532	1579	Replication-associated
Node1473	OM640226.1	21129	ORF1ab_polyprotein	Mesocricetus auratus	Homo sapiens	Coronaviridae_12	Coronaviridae	TRUE	-0.226784	1579	Replication-associated
Node1473	OM640226.1	3552	surface_glycoprotein	Mesocricetus auratus	Homo sapiens	Coronaviridae_12	Coronaviridae	TRUE	0.800984	1579	Entry
Node1473	OM698368.1	669	membrane_glycoprotein	Mesocricetus auratus	Homo sapiens	Coronaviridae_12	Coronaviridae	TRUE	-0.0174458	1579	Structural
Node1473	OM698368.1	1251	nucleocapsid_phosphoprotein	Mesocricetus auratus	Homo sapiens	Coronaviridae_12	Coronaviridae	TRUE	0.283157	1579	Structural
Node1473	OM698368.1	13125	ORF1a_polyprotein	Mesocricetus auratus	Homo sapiens	Coronaviridae_12	Coronaviridae	TRUE	-0.0939672	1579	Replication-associated
Node1473	OM698368.1	21195	ORF1ab_polyprotein	Mesocricetus auratus	Homo sapiens	Coronaviridae_12	Coronaviridae	TRUE	-0.0181055	1579	Replication-associated
Node1473	OM698368.1	828	ORF3a_protein	Mesocricetus auratus	Homo sapiens	Coronaviridae_12	Coronaviridae	TRUE	-0.282724	1579	Auxiliary
Node1473	OM698368.1	186	ORF6_protein	Mesocricetus auratus	Homo sapiens	Coronaviridae_12	Coronaviridae	TRUE	-0.429324	1579	Auxiliary
Node1473	OM698368.1	3705	surface_glycoprotein	Mesocricetus auratus	Homo sapiens	Coronaviridae_12	Coronaviridae	TRUE	1.07688	1579	Entry
Node1473	OM720839.1	21195	ORF1ab_polyprotein	Mesocricetus auratus	Homo sapiens	Coronaviridae_12	Coronaviridae	TRUE	-0.0250361	1579	Replication-associated
Node1473	OM720853.1	1248	nucleocapsid_phosphoprotein	Mesocricetus auratus	Homo sapiens	Coronaviridae_12	Coronaviridae	TRUE	-0.321566	1579	Structural
Node1473	OM720853.1	21195	ORF1ab_polyprotein	Mesocricetus auratus	Homo sapiens	Coronaviridae_12	Coronaviridae	TRUE	-0.270582	1579	Replication-associated
Node1473	OM725222.1	1251	nucleocapsid_phosphoprotein	Mesocricetus auratus	Homo sapiens	Coronaviridae_12	Coronaviridae	TRUE	0.175991	1579	Structural
Node1473	OM725222.1	13119	ORF1a_polyprotein	Mesocricetus auratus	Homo sapiens	Coronaviridae_12	Coronaviridae	TRUE	-0.0382891	1579	Replication-associated
Node1473	OM725222.1	21189	ORF1ab_polyprotein	Mesocricetus auratus	Homo sapiens	Coronaviridae_12	Coronaviridae	TRUE	-0.0267034	1579	Replication-associated
Node1473	OM725222.1	3612	surface_glycoprotein	Mesocricetus auratus	Homo sapiens	Coronaviridae_12	Coronaviridae	TRUE	1.10351	1579	Entry
Node1473	OM732359.1	669	membrane_glycoprotein	Mesocricetus auratus	Homo sapiens	Coronaviridae_12	Coronaviridae	TRUE	0.177384	1579	Structural
Node1473	OM732359.1	1251	nucleocapsid_phosphoprotein	Mesocricetus auratus	Homo sapiens	Coronaviridae_12	Coronaviridae	TRUE	0.175991	1579	Structural
Node1473	OM732359.1	13119	ORF1a_polyprotein	Mesocricetus auratus	Homo sapiens	Coronaviridae_12	Coronaviridae	TRUE	-0.121011	1579	Replication-associated
Node1473	OM732359.1	21189	ORF1ab_polyprotein	Mesocricetus auratus	Homo sapiens	Coronaviridae_12	Coronaviridae	TRUE	-0.0267034	1579	Replication-associated
Node1473	OM732359.1	3702	surface_glycoprotein	Mesocricetus auratus	Homo sapiens	Coronaviridae_12	Coronaviridae	TRUE	1.14971	1579	Entry
Node1473	OM739091.1	13125	ORF1a_polyprotein	Mesocricetus auratus	Homo sapiens	Coronaviridae_12	Coronaviridae	TRUE	0.131201	1579	Replication-associated
Node1473	OM739091.1	21195	ORF1ab_polyprotein	Mesocricetus auratus	Homo sapiens	Coronaviridae_12	Coronaviridae	TRUE	0.384726	1579	Replication-associated
Node1473	OM739115.1	1248	nucleocapsid_phosphoprotein	Mesocricetus auratus	Homo sapiens	Coronaviridae_12	Coronaviridae	TRUE	-0.018623	1579	Structural
Node1473	OM739115.1	13053	ORF1a_polyprotein	Mesocricetus auratus	Homo sapiens	Coronaviridae_12	Coronaviridae	TRUE	-0.326177	1579	Replication-associated
Node1473	OM739115.1	21123	ORF1ab_polyprotein	Mesocricetus auratus	Homo sapiens	Coronaviridae_12	Coronaviridae	TRUE	-0.172563	1579	Replication-associated
Node1473	OM765439.1	1245	nucleocapsid_phosphoprotein	Mesocricetus auratus	Homo sapiens	Coronaviridae_12	Coronaviridae	TRUE	0.176585	1579	Structural
Node1473	OM765439.1	13125	ORF1a_polyprotein	Mesocricetus auratus	Homo sapiens	Coronaviridae_12	Coronaviridae	TRUE	-0.733686	1579	Replication-associated
Node1473	OM765439.1	21195	ORF1ab_polyprotein	Mesocricetus auratus	Homo sapiens	Coronaviridae_12	Coronaviridae	TRUE	-0.688329	1579	Replication-associated
Node1473	OM765439.1	3705	surface_glycoprotein	Mesocricetus auratus	Homo sapiens	Coronaviridae_12	Coronaviridae	TRUE	0.171291	1579	Entry
Node1473	OM765804.1	13119	ORF1a_polyprotein	Mesocricetus auratus	Homo sapiens	Coronaviridae_12	Coronaviridae	TRUE	-0.00588001	1579	Replication-associated
Node1473	OM765804.1	21171	ORF1ab_polyprotein	Mesocricetus auratus	Homo sapiens	Coronaviridae_12	Coronaviridae	TRUE	0.149738	1579	Replication-associated
Node1473	OM765804.1	3702	surface_glycoprotein	Mesocricetus auratus	Homo sapiens	Coronaviridae_12	Coronaviridae	TRUE	0.434039	1579	Entry
Node1473	OM765874.1	1248	nucleocapsid_phosphoprotein	Mesocricetus auratus	Homo sapiens	Coronaviridae_12	Coronaviridae	TRUE	-0.361463	1579	Structural
Node1473	OM765874.1	13089	ORF1a_polyprotein	Mesocricetus auratus	Homo sapiens	Coronaviridae_12	Coronaviridae	TRUE	-0.495391	1579	Replication-associated
Node1473	OM765874.1	21141	ORF1ab_polyprotein	Mesocricetus auratus	Homo sapiens	Coronaviridae_12	Coronaviridae	TRUE	-0.302587	1579	Replication-associated
Node1473	OM765981.1	13125	ORF1a_polyprotein	Mesocricetus auratus	Homo sapiens	Coronaviridae_12	Coronaviridae	TRUE	-0.220321	1579	Replication-associated
Node1473	OM765981.1	21195	ORF1ab_polyprotein	Mesocricetus auratus	Homo sapiens	Coronaviridae_12	Coronaviridae	TRUE	0.00615238	1579	Replication-associated
Node1473	OM765981.1	3705	surface_glycoprotein	Mesocricetus auratus	Homo sapiens	Coronaviridae_12	Coronaviridae	TRUE	0.512744	1579	Entry
Node1473	OM765994.1	13125	ORF1a_polyprotein	Mesocricetus auratus	Homo sapiens	Coronaviridae_12	Coronaviridae	TRUE	-0.0496813	1579	Replication-associated
Node1473	OM765994.1	21195	ORF1ab_polyprotein	Mesocricetus auratus	Homo sapiens	Coronaviridae_12	Coronaviridae	TRUE	0.194982	1579	Replication-associated
Node1473	OM766088.1	669	membrane_glycoprotein	Mesocricetus auratus	Homo sapiens	Coronaviridae_12	Coronaviridae	TRUE	-0.265973	1579	Structural
Node1473	OM766088.1	13125	ORF1a_polyprotein	Mesocricetus auratus	Homo sapiens	Coronaviridae_12	Coronaviridae	TRUE	0.0663092	1579	Replication-associated
Node1473	OM766088.1	21195	ORF1ab_polyprotein	Mesocricetus auratus	Homo sapiens	Coronaviridae_12	Coronaviridae	TRUE	0.0842458	1579	Replication-associated
Node1473	OM766088.1	3705	surface_glycoprotein	Mesocricetus auratus	Homo sapiens	Coronaviridae_12	Coronaviridae	TRUE	0.337996	1579	Entry
Node1473	OM773202.1	1251	nucleocapsid_phosphoprotein	Mesocricetus auratus	Homo sapiens	Coronaviridae_12	Coronaviridae	TRUE	0.175991	1579	Structural
Node1473	OM773202.1	13119	ORF1a_polyprotein	Mesocricetus auratus	Homo sapiens	Coronaviridae_12	Coronaviridae	TRUE	-0.233916	1579	Replication-associated
Node1473	OM773202.1	21189	ORF1ab_polyprotein	Mesocricetus auratus	Homo sapiens	Coronaviridae_12	Coronaviridae	TRUE	-0.074601	1579	Replication-associated
Node1473	OM773202.1	828	ORF3a_protein	Mesocricetus auratus	Homo sapiens	Coronaviridae_12	Coronaviridae	TRUE	-0.393531	1579	Auxiliary
Node1473	OM773202.1	3693	surface_glycoprotein	Mesocricetus auratus	Homo sapiens	Coronaviridae_12	Coronaviridae	TRUE	1.15031	1579	Entry
Node1473	OM773365.1	13125	ORF1a_polyprotein	Mesocricetus auratus	Homo sapiens	Coronaviridae_12	Coronaviridae	TRUE	0.0999137	1579	Replication-associated
Node1473	OM773365.1	21195	ORF1ab_polyprotein	Mesocricetus auratus	Homo sapiens	Coronaviridae_12	Coronaviridae	TRUE	0.170531	1579	Replication-associated
Node1473	OM773365.1	3705	surface_glycoprotein	Mesocricetus auratus	Homo sapiens	Coronaviridae_12	Coronaviridae	TRUE	0.337821	1579	Entry
Node1473	OM816727.1	13125	ORF1a_polyprotein	Mesocricetus auratus	Homo sapiens	Coronaviridae_12	Coronaviridae	TRUE	-0.0588316	1579	Replication-associated
Node1473	OM816727.1	21195	ORF1ab_polyprotein	Mesocricetus auratus	Homo sapiens	Coronaviridae_12	Coronaviridae	TRUE	0.1496	1579	Replication-associated
Node1473	OM816729.1	13125	ORF1a_polyprotein	Mesocricetus auratus	Homo sapiens	Coronaviridae_12	Coronaviridae	TRUE	0.0451078	1579	Replication-associated
Node1473	OM816729.1	21195	ORF1ab_polyprotein	Mesocricetus auratus	Homo sapiens	Coronaviridae_12	Coronaviridae	TRUE	0.24292	1579	Replication-associated
Node1473	OM837855.1	1248	nucleocapsid_phosphoprotein	Mesocricetus auratus	Homo sapiens	Coronaviridae_12	Coronaviridae	TRUE	-0.018623	1579	Structural
Node1473	OM837855.1	13122	ORF1a_polyprotein	Mesocricetus auratus	Homo sapiens	Coronaviridae_12	Coronaviridae	TRUE	-0.271524	1579	Replication-associated
Node1473	OM837855.1	21192	ORF1ab_polyprotein	Mesocricetus auratus	Homo sapiens	Coronaviridae_12	Coronaviridae	TRUE	0.0305098	1579	Replication-associated
Node1473	OM846543.1	1248	nucleocapsid_phosphoprotein	Mesocricetus auratus	Homo sapiens	Coronaviridae_12	Coronaviridae	TRUE	0.253789	1579	Structural
Node1473	OM846543.1	13125	ORF1a_polyprotein	Mesocricetus auratus	Homo sapiens	Coronaviridae_12	Coronaviridae	TRUE	-0.126529	1579	Replication-associated
Node1473	OM846543.1	21195	ORF1ab_polyprotein	Mesocricetus auratus	Homo sapiens	Coronaviridae_12	Coronaviridae	TRUE	0.0383913	1579	Replication-associated
Node1473	OM846543.1	3705	surface_glycoprotein	Mesocricetus auratus	Homo sapiens	Coronaviridae_12	Coronaviridae	TRUE	0.132457	1579	Entry
Node1473	OM846549.1	1248	nucleocapsid_phosphoprotein	Mesocricetus auratus	Homo sapiens	Coronaviridae_12	Coronaviridae	TRUE	0.254101	1579	Structural
Node1473	OM846549.1	13125	ORF1a_polyprotein	Mesocricetus auratus	Homo sapiens	Coronaviridae_12	Coronaviridae	TRUE	-0.181184	1579	Replication-associated
Node1473	OM846549.1	21195	ORF1ab_polyprotein	Mesocricetus auratus	Homo sapiens	Coronaviridae_12	Coronaviridae	TRUE	-0.00276162	1579	Replication-associated
Node1473	OM882625.1	13125	ORF1a_polyprotein	Mesocricetus auratus	Homo sapiens	Coronaviridae_12	Coronaviridae	TRUE	-0.146569	1579	Replication-associated
Node1473	OM882625.1	21195	ORF1ab_polyprotein	Mesocricetus auratus	Homo sapiens	Coronaviridae_12	Coronaviridae	TRUE	0.0818239	1579	Replication-associated
Node1473	OM882625.1	3615	surface_glycoprotein	Mesocricetus auratus	Homo sapiens	Coronaviridae_12	Coronaviridae	TRUE	0.214743	1579	Entry
Node1473	OM884049.1	13125	ORF1a_polyprotein	Mesocricetus auratus	Homo sapiens	Coronaviridae_12	Coronaviridae	TRUE	-0.00602272	1579	Replication-associated
Node1473	OM884049.1	21195	ORF1ab_polyprotein	Mesocricetus auratus	Homo sapiens	Coronaviridae_12	Coronaviridae	TRUE	0.264589	1579	Replication-associated
Node1473	OM884049.1	828	ORF3a_protein	Mesocricetus auratus	Homo sapiens	Coronaviridae_12	Coronaviridae	TRUE	-0.0335032	1579	Auxiliary
Node1473	OM884061.1	669	membrane_glycoprotein	Mesocricetus auratus	Homo sapiens	Coronaviridae_12	Coronaviridae	TRUE	-0.265973	1579	Structural
Node1473	OM884061.1	13125	ORF1a_polyprotein	Mesocricetus auratus	Homo sapiens	Coronaviridae_12	Coronaviridae	TRUE	0.226415	1579	Replication-associated
Node1473	OM884061.1	21195	ORF1ab_polyprotein	Mesocricetus auratus	Homo sapiens	Coronaviridae_12	Coronaviridae	TRUE	0.264587	1579	Replication-associated
Node1473	OM884061.1	828	ORF3a_protein	Mesocricetus auratus	Homo sapiens	Coronaviridae_12	Coronaviridae	TRUE	-0.28067	1579	Auxiliary
Node1473	OM900175.1	1248	nucleocapsid_phosphoprotein	Mesocricetus auratus	Homo sapiens	Coronaviridae_12	Coronaviridae	TRUE	-0.355951	1579	Structural
Node1473	OM900175.1	21195	ORF1ab_polyprotein	Mesocricetus auratus	Homo sapiens	Coronaviridae_12	Coronaviridae	TRUE	-0.569354	1579	Replication-associated
Node1473	OM900175.1	828	ORF3a_protein	Mesocricetus auratus	Homo sapiens	Coronaviridae_12	Coronaviridae	TRUE	-0.393531	1579	Auxiliary
Node1473	OM900175.1	3702	surface_glycoprotein	Mesocricetus auratus	Homo sapiens	Coronaviridae_12	Coronaviridae	TRUE	-0.387873	1579	Entry
Node1473	OM915402.1	1248	nucleocapsid_phosphoprotein	Mesocricetus auratus	Homo sapiens	Coronaviridae_12	Coronaviridae	TRUE	-0.321566	1579	Structural
Node1473	OM915402.1	13125	ORF1a_polyprotein	Mesocricetus auratus	Homo sapiens	Coronaviridae_12	Coronaviridae	TRUE	-0.346153	1579	Replication-associated
Node1473	OM915402.1	21195	ORF1ab_polyprotein	Mesocricetus auratus	Homo sapiens	Coronaviridae_12	Coronaviridae	TRUE	-0.217536	1579	Replication-associated
Node1473	OM915402.1	3702	surface_glycoprotein	Mesocricetus auratus	Homo sapiens	Coronaviridae_12	Coronaviridae	TRUE	-0.387873	1579	Entry
Node1473	OM961074.1	1248	nucleocapsid_phosphoprotein	Mesocricetus auratus	Homo sapiens	Coronaviridae_12	Coronaviridae	TRUE	-0.132949	1579	Structural
Node1473	OM961074.1	13125	ORF1a_polyprotein	Mesocricetus auratus	Homo sapiens	Coronaviridae_12	Coronaviridae	TRUE	0.290517	1579	Replication-associated
Node1473	OM961074.1	21195	ORF1ab_polyprotein	Mesocricetus auratus	Homo sapiens	Coronaviridae_12	Coronaviridae	TRUE	-0.0261451	1579	Replication-associated
Node1473	OM961074.1	3705	surface_glycoprotein	Mesocricetus auratus	Homo sapiens	Coronaviridae_12	Coronaviridae	TRUE	0.133427	1579	Entry
Node1473	OM961205.1	13125	ORF1a_polyprotein	Mesocricetus auratus	Homo sapiens	Coronaviridae_12	Coronaviridae	TRUE	-0.0283157	1579	Replication-associated
Node1473	OM961205.1	21195	ORF1ab_polyprotein	Mesocricetus auratus	Homo sapiens	Coronaviridae_12	Coronaviridae	TRUE	0.0720665	1579	Replication-associated
Node1473	OM961205.1	3705	surface_glycoprotein	Mesocricetus auratus	Homo sapiens	Coronaviridae_12	Coronaviridae	TRUE	-0.117743	1579	Entry
Node1473	OM961219.1	669	membrane_glycoprotein	Mesocricetus auratus	Homo sapiens	Coronaviridae_12	Coronaviridae	TRUE	-0.266643	1579	Structural
Node1473	OM961219.1	13125	ORF1a_polyprotein	Mesocricetus auratus	Homo sapiens	Coronaviridae_12	Coronaviridae	TRUE	-0.23024	1579	Replication-associated
Node1473	OM961219.1	21195	ORF1ab_polyprotein	Mesocricetus auratus	Homo sapiens	Coronaviridae_12	Coronaviridae	TRUE	-0.150026	1579	Replication-associated
Node1473	OM961219.1	3705	surface_glycoprotein	Mesocricetus auratus	Homo sapiens	Coronaviridae_12	Coronaviridae	TRUE	-0.19275	1579	Entry
Node1473	OM965054.1	1248	nucleocapsid_phosphoprotein	Mesocricetus auratus	Homo sapiens	Coronaviridae_12	Coronaviridae	TRUE	0.17601	1579	Structural
Node1473	OM965054.1	13107	ORF1a_polyprotein	Mesocricetus auratus	Homo sapiens	Coronaviridae_12	Coronaviridae	TRUE	-0.212887	1579	Replication-associated
Node1473	OM965054.1	21177	ORF1ab_polyprotein	Mesocricetus auratus	Homo sapiens	Coronaviridae_12	Coronaviridae	TRUE	-0.159911	1579	Replication-associated
Node1473	OM965054.1	3690	surface_glycoprotein	Mesocricetus auratus	Homo sapiens	Coronaviridae_12	Coronaviridae	TRUE	0.833453	1579	Entry
Node1473	OM971722.1	13125	ORF1a_polyprotein	Mesocricetus auratus	Homo sapiens	Coronaviridae_12	Coronaviridae	TRUE	0.170183	1579	Replication-associated
Node1473	OM971722.1	21195	ORF1ab_polyprotein	Mesocricetus auratus	Homo sapiens	Coronaviridae_12	Coronaviridae	TRUE	0.264503	1579	Replication-associated
Node1473	OM978208.1	1248	nucleocapsid_phosphoprotein	Mesocricetus auratus	Homo sapiens	Coronaviridae_12	Coronaviridae	TRUE	0.17601	1579	Structural
Node1473	OM978208.1	13125	ORF1a_polyprotein	Mesocricetus auratus	Homo sapiens	Coronaviridae_12	Coronaviridae	TRUE	-0.0953802	1579	Replication-associated
Node1473	OM978208.1	21195	ORF1ab_polyprotein	Mesocricetus auratus	Homo sapiens	Coronaviridae_12	Coronaviridae	TRUE	0.127486	1579	Replication-associated
Node1473	OM978387.1	1248	nucleocapsid_phosphoprotein	Mesocricetus auratus	Homo sapiens	Coronaviridae_12	Coronaviridae	TRUE	0.138991	1579	Structural
Node1473	OM978387.1	13125	ORF1a_polyprotein	Mesocricetus auratus	Homo sapiens	Coronaviridae_12	Coronaviridae	TRUE	-0.748794	1579	Replication-associated
Node1473	OM978387.1	21195	ORF1ab_polyprotein	Mesocricetus auratus	Homo sapiens	Coronaviridae_12	Coronaviridae	TRUE	-0.172515	1579	Replication-associated
Node1473	OM978404.1	1248	nucleocapsid_phosphoprotein	Mesocricetus auratus	Homo sapiens	Coronaviridae_12	Coronaviridae	TRUE	0.17601	1579	Structural
Node1473	OM978404.1	13125	ORF1a_polyprotein	Mesocricetus auratus	Homo sapiens	Coronaviridae_12	Coronaviridae	TRUE	-0.271632	1579	Replication-associated
Node1473	OM978404.1	21195	ORF1ab_polyprotein	Mesocricetus auratus	Homo sapiens	Coronaviridae_12	Coronaviridae	TRUE	-0.306158	1579	Replication-associated
Node1473	OM978418.1	1248	nucleocapsid_phosphoprotein	Mesocricetus auratus	Homo sapiens	Coronaviridae_12	Coronaviridae	TRUE	0.283177	1579	Structural
Node1473	OM978418.1	21195	ORF1ab_polyprotein	Mesocricetus auratus	Homo sapiens	Coronaviridae_12	Coronaviridae	TRUE	-0.306857	1579	Replication-associated
Node1473	OM982638.1	1248	nucleocapsid_phosphoprotein	Mesocricetus auratus	Homo sapiens	Coronaviridae_12	Coronaviridae	TRUE	0.17601	1579	Structural
Node1473	OM982638.1	13125	ORF1a_polyprotein	Mesocricetus auratus	Homo sapiens	Coronaviridae_12	Coronaviridae	TRUE	-0.447713	1579	Replication-associated
Node1473	OM982638.1	21195	ORF1ab_polyprotein	Mesocricetus auratus	Homo sapiens	Coronaviridae_12	Coronaviridae	TRUE	-0.270606	1579	Replication-associated
Node1473	OM982643.1	1248	nucleocapsid_phosphoprotein	Mesocricetus auratus	Homo sapiens	Coronaviridae_12	Coronaviridae	TRUE	0.138991	1579	Structural
Node1473	OM982643.1	13125	ORF1a_polyprotein	Mesocricetus auratus	Homo sapiens	Coronaviridae_12	Coronaviridae	TRUE	-0.865855	1579	Replication-associated
Node1473	OM982643.1	21195	ORF1ab_polyprotein	Mesocricetus auratus	Homo sapiens	Coronaviridae_12	Coronaviridae	TRUE	-0.201249	1579	Replication-associated
Node1473	OM982643.1	3702	surface_glycoprotein	Mesocricetus auratus	Homo sapiens	Coronaviridae_12	Coronaviridae	TRUE	-0.269829	1579	Entry
Node1473	OM988404.1	669	membrane_glycoprotein	Mesocricetus auratus	Homo sapiens	Coronaviridae_12	Coronaviridae	TRUE	-0.0174458	1579	Structural
Node1473	OM988404.1	1251	nucleocapsid_phosphoprotein	Mesocricetus auratus	Homo sapiens	Coronaviridae_12	Coronaviridae	TRUE	0.283157	1579	Structural
Node1473	OM988404.1	13017	ORF1a_polyprotein	Mesocricetus auratus	Homo sapiens	Coronaviridae_12	Coronaviridae	TRUE	0.0572174	1579	Replication-associated
Node1473	OM988404.1	21087	ORF1ab_polyprotein	Mesocricetus auratus	Homo sapiens	Coronaviridae_12	Coronaviridae	TRUE	0.0153123	1579	Replication-associated
Node1473	OM988404.1	828	ORF3a_protein	Mesocricetus auratus	Homo sapiens	Coronaviridae_12	Coronaviridae	TRUE	-0.282724	1579	Auxiliary
Node1473	OM988404.1	186	ORF6_protein	Mesocricetus auratus	Homo sapiens	Coronaviridae_12	Coronaviridae	TRUE	-0.429324	1579	Auxiliary
Node1473	OM988404.1	3705	surface_glycoprotein	Mesocricetus auratus	Homo sapiens	Coronaviridae_12	Coronaviridae	TRUE	1.07688	1579	Entry
Node1473	ON008279.1	13125	ORF1a_polyprotein	Mesocricetus auratus	Homo sapiens	Coronaviridae_12	Coronaviridae	TRUE	0.0809306	1579	Replication-associated
Node1473	ON008279.1	21195	ORF1ab_polyprotein	Mesocricetus auratus	Homo sapiens	Coronaviridae_12	Coronaviridae	TRUE	0.14468	1579	Replication-associated
Node1473	ON008279.1	3705	surface_glycoprotein	Mesocricetus auratus	Homo sapiens	Coronaviridae_12	Coronaviridae	TRUE	-0.19275	1579	Entry
Node1473	ON017184.1	1248	nucleocapsid_phosphoprotein	Mesocricetus auratus	Homo sapiens	Coronaviridae_12	Coronaviridae	TRUE	-0.018623	1579	Structural
Node1473	ON017184.1	21186	ORF1ab_polyprotein	Mesocricetus auratus	Homo sapiens	Coronaviridae_12	Coronaviridae	TRUE	0.206729	1579	Replication-associated
Node1473	ON017195.1	1248	nucleocapsid_phosphoprotein	Mesocricetus auratus	Homo sapiens	Coronaviridae_12	Coronaviridae	TRUE	0.0454807	1579	Structural
Node1473	ON017195.1	13113	ORF1a_polyprotein	Mesocricetus auratus	Homo sapiens	Coronaviridae_12	Coronaviridae	TRUE	-0.395063	1579	Replication-associated
Node1473	ON017195.1	21168	ORF1ab_polyprotein	Mesocricetus auratus	Homo sapiens	Coronaviridae_12	Coronaviridae	TRUE	-0.148302	1579	Replication-associated
Node1473	ON017195.1	3702	surface_glycoprotein	Mesocricetus auratus	Homo sapiens	Coronaviridae_12	Coronaviridae	TRUE	0.663538	1579	Entry
Node1473	ON017272.1	1248	nucleocapsid_phosphoprotein	Mesocricetus auratus	Homo sapiens	Coronaviridae_12	Coronaviridae	TRUE	0.0454807	1579	Structural
Node1473	ON017272.1	13116	ORF1a_polyprotein	Mesocricetus auratus	Homo sapiens	Coronaviridae_12	Coronaviridae	TRUE	-0.647081	1579	Replication-associated
Node1473	ON017272.1	21186	ORF1ab_polyprotein	Mesocricetus auratus	Homo sapiens	Coronaviridae_12	Coronaviridae	TRUE	-0.522554	1579	Replication-associated
Node1473	ON017272.1	828	ORF3a_protein	Mesocricetus auratus	Homo sapiens	Coronaviridae_12	Coronaviridae	TRUE	-0.0337786	1579	Auxiliary
Node1473	ON017272.1	3702	surface_glycoprotein	Mesocricetus auratus	Homo sapiens	Coronaviridae_12	Coronaviridae	TRUE	0.663538	1579	Entry
Node1473	ON017665.1	1245	nucleocapsid_phosphoprotein	Mesocricetus auratus	Homo sapiens	Coronaviridae_12	Coronaviridae	TRUE	-0.0833425	1579	Structural
Node1473	ON017665.1	13125	ORF1a_polyprotein	Mesocricetus auratus	Homo sapiens	Coronaviridae_12	Coronaviridae	TRUE	0.346398	1579	Replication-associated
Node1473	ON017665.1	21195	ORF1ab_polyprotein	Mesocricetus auratus	Homo sapiens	Coronaviridae_12	Coronaviridae	TRUE	0.518011	1579	Replication-associated
Node1473	ON017665.1	366	ORF7a_protein	Mesocricetus auratus	Homo sapiens	Coronaviridae_12	Coronaviridae	TRUE	-0.329123	1579	Auxiliary
Node1473	ON025070.1	13125	ORF1a_polyprotein	Mesocricetus auratus	Homo sapiens	Coronaviridae_12	Coronaviridae	TRUE	-0.0938285	1579	Replication-associated
Node1473	ON025070.1	21195	ORF1ab_polyprotein	Mesocricetus auratus	Homo sapiens	Coronaviridae_12	Coronaviridae	TRUE	0.128312	1579	Replication-associated
Node1473	ON025070.1	3705	surface_glycoprotein	Mesocricetus auratus	Homo sapiens	Coronaviridae_12	Coronaviridae	TRUE	0.433837	1579	Entry
Node1473	ON026030.1	1251	nucleocapsid_phosphoprotein	Mesocricetus auratus	Homo sapiens	Coronaviridae_12	Coronaviridae	TRUE	0.175991	1579	Structural
Node1473	ON026030.1	13119	ORF1a_polyprotein	Mesocricetus auratus	Homo sapiens	Coronaviridae_12	Coronaviridae	TRUE	-0.0971436	1579	Replication-associated
Node1473	ON026030.1	21189	ORF1ab_polyprotein	Mesocricetus auratus	Homo sapiens	Coronaviridae_12	Coronaviridae	TRUE	-0.0745715	1579	Replication-associated
Node1473	ON026049.1	1251	nucleocapsid_phosphoprotein	Mesocricetus auratus	Homo sapiens	Coronaviridae_12	Coronaviridae	TRUE	0.175991	1579	Structural
Node1473	ON026049.1	13119	ORF1a_polyprotein	Mesocricetus auratus	Homo sapiens	Coronaviridae_12	Coronaviridae	TRUE	-0.151281	1579	Replication-associated
Node1473	ON026049.1	21189	ORF1ab_polyprotein	Mesocricetus auratus	Homo sapiens	Coronaviridae_12	Coronaviridae	TRUE	-0.188683	1579	Replication-associated
Node1473	ON031003.1	13125	ORF1a_polyprotein	Mesocricetus auratus	Homo sapiens	Coronaviridae_12	Coronaviridae	TRUE	0.242448	1579	Replication-associated
Node1473	ON031003.1	21162	ORF1ab_polyprotein	Mesocricetus auratus	Homo sapiens	Coronaviridae_12	Coronaviridae	TRUE	0.314307	1579	Replication-associated
Node1473	ON031003.1	3702	surface_glycoprotein	Mesocricetus auratus	Homo sapiens	Coronaviridae_12	Coronaviridae	TRUE	0.338008	1579	Entry
Node1473	ON031015.1	669	membrane_glycoprotein	Mesocricetus auratus	Homo sapiens	Coronaviridae_12	Coronaviridae	TRUE	-0.265973	1579	Structural
Node1473	ON031015.1	13125	ORF1a_polyprotein	Mesocricetus auratus	Homo sapiens	Coronaviridae_12	Coronaviridae	TRUE	-0.228161	1579	Replication-associated
Node1473	ON031015.1	21195	ORF1ab_polyprotein	Mesocricetus auratus	Homo sapiens	Coronaviridae_12	Coronaviridae	TRUE	0.0128797	1579	Replication-associated
Node1473	ON031015.1	3702	surface_glycoprotein	Mesocricetus auratus	Homo sapiens	Coronaviridae_12	Coronaviridae	TRUE	0.338008	1579	Entry
Node1473	ON032857.1	1245	nucleocapsid_phosphoprotein	Mesocricetus auratus	Homo sapiens	Coronaviridae_12	Coronaviridae	TRUE	0.00959176	1579	Structural
Node1473	ON032857.1	13095	ORF1a_polyprotein	Mesocricetus auratus	Homo sapiens	Coronaviridae_12	Coronaviridae	TRUE	-0.0361573	1579	Replication-associated
Node1473	ON032857.1	21138	ORF1ab_polyprotein	Mesocricetus auratus	Homo sapiens	Coronaviridae_12	Coronaviridae	TRUE	-0.0270454	1579	Replication-associated
Node1473	ON032857.1	3630	surface_glycoprotein	Mesocricetus auratus	Homo sapiens	Coronaviridae_12	Coronaviridae	TRUE	1.05618	1579	Entry
Node1473	ON077204.1	669	membrane_glycoprotein	Mesocricetus auratus	Homo sapiens	Coronaviridae_12	Coronaviridae	TRUE	-0.0174458	1579	Structural
Node1473	ON077204.1	1251	nucleocapsid_phosphoprotein	Mesocricetus auratus	Homo sapiens	Coronaviridae_12	Coronaviridae	TRUE	0.283157	1579	Structural
Node1473	ON077204.1	13083	ORF1a_polyprotein	Mesocricetus auratus	Homo sapiens	Coronaviridae_12	Coronaviridae	TRUE	-0.0938947	1579	Replication-associated
Node1473	ON077204.1	21153	ORF1ab_polyprotein	Mesocricetus auratus	Homo sapiens	Coronaviridae_12	Coronaviridae	TRUE	-0.183666	1579	Replication-associated
Node1473	ON077204.1	828	ORF3a_protein	Mesocricetus auratus	Homo sapiens	Coronaviridae_12	Coronaviridae	TRUE	0.01911	1579	Auxiliary
Node1473	ON077204.1	186	ORF6_protein	Mesocricetus auratus	Homo sapiens	Coronaviridae_12	Coronaviridae	TRUE	-0.429324	1579	Auxiliary
Node1473	ON077204.1	3705	surface_glycoprotein	Mesocricetus auratus	Homo sapiens	Coronaviridae_12	Coronaviridae	TRUE	1.07688	1579	Entry
Node1473	ON078412.1	13125	ORF1a_polyprotein	Mesocricetus auratus	Homo sapiens	Coronaviridae_12	Coronaviridae	TRUE	-0.169331	1579	Replication-associated
Node1473	ON078412.1	21195	ORF1ab_polyprotein	Mesocricetus auratus	Homo sapiens	Coronaviridae_12	Coronaviridae	TRUE	0.00702318	1579	Replication-associated
Node1473	ON078412.1	828	ORF3a_protein	Mesocricetus auratus	Homo sapiens	Coronaviridae_12	Coronaviridae	TRUE	-0.28067	1579	Auxiliary
Node1473	ON078412.1	3705	surface_glycoprotein	Mesocricetus auratus	Homo sapiens	Coronaviridae_12	Coronaviridae	TRUE	0.338047	1579	Entry
Node1473	ON078481.1	13125	ORF1a_polyprotein	Mesocricetus auratus	Homo sapiens	Coronaviridae_12	Coronaviridae	TRUE	-0.00602272	1579	Replication-associated
Node1473	ON078481.1	21195	ORF1ab_polyprotein	Mesocricetus auratus	Homo sapiens	Coronaviridae_12	Coronaviridae	TRUE	0.149628	1579	Replication-associated
Node1473	ON078481.1	3705	surface_glycoprotein	Mesocricetus auratus	Homo sapiens	Coronaviridae_12	Coronaviridae	TRUE	0.132457	1579	Entry
Node1473	ON099581.1	1251	nucleocapsid_phosphoprotein	Mesocricetus auratus	Homo sapiens	Coronaviridae_12	Coronaviridae	TRUE	0.175991	1579	Structural
Node1473	ON099581.1	13119	ORF1a_polyprotein	Mesocricetus auratus	Homo sapiens	Coronaviridae_12	Coronaviridae	TRUE	-0.0970406	1579	Replication-associated
Node1473	ON099581.1	21189	ORF1ab_polyprotein	Mesocricetus auratus	Homo sapiens	Coronaviridae_12	Coronaviridae	TRUE	-0.0263647	1579	Replication-associated
Node1473	ON099581.1	3702	surface_glycoprotein	Mesocricetus auratus	Homo sapiens	Coronaviridae_12	Coronaviridae	TRUE	1.1327	1579	Entry
Node1473	ON099816.1	13125	ORF1a_polyprotein	Mesocricetus auratus	Homo sapiens	Coronaviridae_12	Coronaviridae	TRUE	0.304408	1579	Replication-associated
Node1473	ON099816.1	21195	ORF1ab_polyprotein	Mesocricetus auratus	Homo sapiens	Coronaviridae_12	Coronaviridae	TRUE	0.517966	1579	Replication-associated
Node1473	ON106927.1	636	membrane_glycoprotein	Mesocricetus auratus	Homo sapiens	Coronaviridae_12	Coronaviridae	TRUE	-0.0154903	1579	Structural
Node1473	ON106927.1	1251	nucleocapsid_phosphoprotein	Mesocricetus auratus	Homo sapiens	Coronaviridae_12	Coronaviridae	TRUE	0.283157	1579	Structural
Node1473	ON106927.1	13125	ORF1a_polyprotein	Mesocricetus auratus	Homo sapiens	Coronaviridae_12	Coronaviridae	TRUE	-0.119051	1579	Replication-associated
Node1473	ON106927.1	21195	ORF1ab_polyprotein	Mesocricetus auratus	Homo sapiens	Coronaviridae_12	Coronaviridae	TRUE	-0.0761209	1579	Replication-associated
Node1473	ON106927.1	828	ORF3a_protein	Mesocricetus auratus	Homo sapiens	Coronaviridae_12	Coronaviridae	TRUE	0.0190952	1579	Auxiliary
Node1473	ON106927.1	186	ORF6_protein	Mesocricetus auratus	Homo sapiens	Coronaviridae_12	Coronaviridae	TRUE	-0.429324	1579	Auxiliary
Node1473	ON106927.1	3705	surface_glycoprotein	Mesocricetus auratus	Homo sapiens	Coronaviridae_12	Coronaviridae	TRUE	1.07688	1579	Entry
Node1473	ON142019.1	1248	nucleocapsid_phosphoprotein	Mesocricetus auratus	Homo sapiens	Coronaviridae_12	Coronaviridae	TRUE	-0.124777	1579	Structural
Node1473	ON142019.1	13125	ORF1a_polyprotein	Mesocricetus auratus	Homo sapiens	Coronaviridae_12	Coronaviridae	TRUE	-0.302457	1579	Replication-associated
Node1473	ON142019.1	21195	ORF1ab_polyprotein	Mesocricetus auratus	Homo sapiens	Coronaviridae_12	Coronaviridae	TRUE	-0.385875	1579	Replication-associated
Node1473	ON192309.1	21186	ORF1ab_polyprotein	Mesocricetus auratus	Homo sapiens	Coronaviridae_12	Coronaviridae	TRUE	0.40701	1579	Replication-associated
Node1473	ON192309.1	3702	surface_glycoprotein	Mesocricetus auratus	Homo sapiens	Coronaviridae_12	Coronaviridae	TRUE	0.43009	1579	Entry
Node1473	ON192599.1	1248	nucleocapsid_phosphoprotein	Mesocricetus auratus	Homo sapiens	Coronaviridae_12	Coronaviridae	TRUE	0.0104211	1579	Structural
Node1473	ON192599.1	13116	ORF1a_polyprotein	Mesocricetus auratus	Homo sapiens	Coronaviridae_12	Coronaviridae	TRUE	-0.448038	1579	Replication-associated
Node1473	ON192599.1	21186	ORF1ab_polyprotein	Mesocricetus auratus	Homo sapiens	Coronaviridae_12	Coronaviridae	TRUE	-0.29781	1579	Replication-associated
Node1473	ON192806.1	1248	nucleocapsid_phosphoprotein	Mesocricetus auratus	Homo sapiens	Coronaviridae_12	Coronaviridae	TRUE	-0.018623	1579	Structural
Node1473	ON192806.1	13125	ORF1a_polyprotein	Mesocricetus auratus	Homo sapiens	Coronaviridae_12	Coronaviridae	TRUE	0.406598	1579	Replication-associated
Node1473	ON192806.1	21195	ORF1ab_polyprotein	Mesocricetus auratus	Homo sapiens	Coronaviridae_12	Coronaviridae	TRUE	0.242679	1579	Replication-associated
Node1473	ON193040.1	13125	ORF1a_polyprotein	Mesocricetus auratus	Homo sapiens	Coronaviridae_12	Coronaviridae	TRUE	0.0999052	1579	Replication-associated
Node1473	ON193040.1	21195	ORF1ab_polyprotein	Mesocricetus auratus	Homo sapiens	Coronaviridae_12	Coronaviridae	TRUE	0.324439	1579	Replication-associated
Node1473	ON193062.1	13125	ORF1a_polyprotein	Mesocricetus auratus	Homo sapiens	Coronaviridae_12	Coronaviridae	TRUE	0.232955	1579	Replication-associated
Node1473	ON193062.1	21195	ORF1ab_polyprotein	Mesocricetus auratus	Homo sapiens	Coronaviridae_12	Coronaviridae	TRUE	0.127212	1579	Replication-associated
Node1473	ON193635.1	13125	ORF1a_polyprotein	Mesocricetus auratus	Homo sapiens	Coronaviridae_12	Coronaviridae	TRUE	-0.186607	1579	Replication-associated
Node1473	ON193635.1	21195	ORF1ab_polyprotein	Mesocricetus auratus	Homo sapiens	Coronaviridae_12	Coronaviridae	TRUE	-0.1436	1579	Replication-associated
Node1473	ON193635.1	3705	surface_glycoprotein	Mesocricetus auratus	Homo sapiens	Coronaviridae_12	Coronaviridae	TRUE	0.184572	1579	Entry
Node1473	ON194237.1	21195	ORF1ab_polyprotein	Mesocricetus auratus	Homo sapiens	Coronaviridae_12	Coronaviridae	TRUE	0.0305032	1579	Replication-associated
Node1473	ON194543.1	13125	ORF1a_polyprotein	Mesocricetus auratus	Homo sapiens	Coronaviridae_12	Coronaviridae	TRUE	0.0295381	1579	Replication-associated
Node1473	ON194543.1	21195	ORF1ab_polyprotein	Mesocricetus auratus	Homo sapiens	Coronaviridae_12	Coronaviridae	TRUE	-0.0486644	1579	Replication-associated
Node1473	ON194543.1	3702	surface_glycoprotein	Mesocricetus auratus	Homo sapiens	Coronaviridae_12	Coronaviridae	TRUE	-0.387851	1579	Entry
Node1473	ON195237.1	13125	ORF1a_polyprotein	Mesocricetus auratus	Homo sapiens	Coronaviridae_12	Coronaviridae	TRUE	0.333806	1579	Replication-associated
Node1473	ON195237.1	21195	ORF1ab_polyprotein	Mesocricetus auratus	Homo sapiens	Coronaviridae_12	Coronaviridae	TRUE	0.509422	1579	Replication-associated
Node1473	ON195237.1	366	ORF7a_protein	Mesocricetus auratus	Homo sapiens	Coronaviridae_12	Coronaviridae	TRUE	-0.329123	1579	Auxiliary
Node1473	ON196118.1	1251	nucleocapsid_phosphoprotein	Mesocricetus auratus	Homo sapiens	Coronaviridae_12	Coronaviridae	TRUE	0.175991	1579	Structural
Node1473	ON196118.1	13098	ORF1a_polyprotein	Mesocricetus auratus	Homo sapiens	Coronaviridae_12	Coronaviridae	TRUE	-0.323857	1579	Replication-associated
Node1473	ON196118.1	21168	ORF1ab_polyprotein	Mesocricetus auratus	Homo sapiens	Coronaviridae_12	Coronaviridae	TRUE	-0.248755	1579	Replication-associated
Node1473	ON196118.1	3642	surface_glycoprotein	Mesocricetus auratus	Homo sapiens	Coronaviridae_12	Coronaviridae	TRUE	0.848079	1579	Entry
Node1473	ON196320.1	1248	nucleocapsid_phosphoprotein	Mesocricetus auratus	Homo sapiens	Coronaviridae_12	Coronaviridae	TRUE	-0.266015	1579	Structural
Node1473	ON196320.1	13125	ORF1a_polyprotein	Mesocricetus auratus	Homo sapiens	Coronaviridae_12	Coronaviridae	TRUE	-0.388591	1579	Replication-associated
Node1473	ON196320.1	21195	ORF1ab_polyprotein	Mesocricetus auratus	Homo sapiens	Coronaviridae_12	Coronaviridae	TRUE	-0.627198	1579	Replication-associated
Node1473	ON196320.1	3702	surface_glycoprotein	Mesocricetus auratus	Homo sapiens	Coronaviridae_12	Coronaviridae	TRUE	-0.866153	1579	Entry
Node1473	ON196325.1	13125	ORF1a_polyprotein	Mesocricetus auratus	Homo sapiens	Coronaviridae_12	Coronaviridae	TRUE	-1.00158	1579	Replication-associated
Node1473	ON196325.1	21195	ORF1ab_polyprotein	Mesocricetus auratus	Homo sapiens	Coronaviridae_12	Coronaviridae	TRUE	-0.777693	1579	Replication-associated
Node1473	ON196325.1	828	ORF3a_protein	Mesocricetus auratus	Homo sapiens	Coronaviridae_12	Coronaviridae	TRUE	-0.39538	1579	Auxiliary
Node1473	ON196342.1	1248	nucleocapsid_phosphoprotein	Mesocricetus auratus	Homo sapiens	Coronaviridae_12	Coronaviridae	TRUE	0.17601	1579	Structural
Node1473	ON196342.1	21183	ORF1ab_polyprotein	Mesocricetus auratus	Homo sapiens	Coronaviridae_12	Coronaviridae	TRUE	0.577261	1579	Replication-associated
Node1473	ON209739.1	13125	ORF1a_polyprotein	Mesocricetus auratus	Homo sapiens	Coronaviridae_12	Coronaviridae	TRUE	-0.388527	1579	Replication-associated
Node1473	ON209739.1	21195	ORF1ab_polyprotein	Mesocricetus auratus	Homo sapiens	Coronaviridae_12	Coronaviridae	TRUE	0.170372	1579	Replication-associated
Node1473	ON209740.1	13125	ORF1a_polyprotein	Mesocricetus auratus	Homo sapiens	Coronaviridae_12	Coronaviridae	TRUE	-0.326241	1579	Replication-associated
Node1473	ON209740.1	21195	ORF1ab_polyprotein	Mesocricetus auratus	Homo sapiens	Coronaviridae_12	Coronaviridae	TRUE	-0.172585	1579	Replication-associated
Node1473	ON239196.1	13125	ORF1a_polyprotein	Mesocricetus auratus	Homo sapiens	Coronaviridae_12	Coronaviridae	TRUE	-0.0209656	1579	Replication-associated
Node1473	ON239196.1	21180	ORF1ab_polyprotein	Mesocricetus auratus	Homo sapiens	Coronaviridae_12	Coronaviridae	TRUE	0.0843523	1579	Replication-associated
Node1473	ON239230.1	1248	nucleocapsid_phosphoprotein	Mesocricetus auratus	Homo sapiens	Coronaviridae_12	Coronaviridae	TRUE	0.175957	1579	Structural
Node1473	ON239230.1	13125	ORF1a_polyprotein	Mesocricetus auratus	Homo sapiens	Coronaviridae_12	Coronaviridae	TRUE	-0.326379	1579	Replication-associated
Node1473	ON239230.1	21195	ORF1ab_polyprotein	Mesocricetus auratus	Homo sapiens	Coronaviridae_12	Coronaviridae	TRUE	-0.475742	1579	Replication-associated
Node1473	ON244676.1	13125	ORF1a_polyprotein	Mesocricetus auratus	Homo sapiens	Coronaviridae_12	Coronaviridae	TRUE	-0.227205	1579	Replication-associated
Node1473	ON244676.1	21195	ORF1ab_polyprotein	Mesocricetus auratus	Homo sapiens	Coronaviridae_12	Coronaviridae	TRUE	-0.225581	1579	Replication-associated
Node1473	ON245079.1	1251	nucleocapsid_phosphoprotein	Mesocricetus auratus	Homo sapiens	Coronaviridae_12	Coronaviridae	TRUE	0.175991	1579	Structural
Node1473	ON245079.1	13119	ORF1a_polyprotein	Mesocricetus auratus	Homo sapiens	Coronaviridae_12	Coronaviridae	TRUE	-0.352408	1579	Replication-associated
Node1473	ON245079.1	21189	ORF1ab_polyprotein	Mesocricetus auratus	Homo sapiens	Coronaviridae_12	Coronaviridae	TRUE	-0.27651	1579	Replication-associated
Node1473	ON245079.1	3702	surface_glycoprotein	Mesocricetus auratus	Homo sapiens	Coronaviridae_12	Coronaviridae	TRUE	1.1327	1579	Entry
Node1473	ON265398.1	1251	nucleocapsid_phosphoprotein	Mesocricetus auratus	Homo sapiens	Coronaviridae_12	Coronaviridae	TRUE	0.175991	1579	Structural
Node1473	ON265398.1	13116	ORF1a_polyprotein	Mesocricetus auratus	Homo sapiens	Coronaviridae_12	Coronaviridae	TRUE	-0.233984	1579	Replication-associated
Node1473	ON265398.1	21165	ORF1ab_polyprotein	Mesocricetus auratus	Homo sapiens	Coronaviridae_12	Coronaviridae	TRUE	-0.0745528	1579	Replication-associated
Node1473	ON265398.1	828	ORF3a_protein	Mesocricetus auratus	Homo sapiens	Coronaviridae_12	Coronaviridae	TRUE	-0.396358	1579	Auxiliary
Node1473	ON265398.1	3627	surface_glycoprotein	Mesocricetus auratus	Homo sapiens	Coronaviridae_12	Coronaviridae	TRUE	1.10063	1579	Entry
Node1473	ON272755.1	13125	ORF1a_polyprotein	Mesocricetus auratus	Homo sapiens	Coronaviridae_12	Coronaviridae	TRUE	-0.755177	1579	Replication-associated
Node1473	ON272755.1	21195	ORF1ab_polyprotein	Mesocricetus auratus	Homo sapiens	Coronaviridae_12	Coronaviridae	TRUE	-0.297571	1579	Replication-associated
Node1473	ON272755.1	828	ORF3a_protein	Mesocricetus auratus	Homo sapiens	Coronaviridae_12	Coronaviridae	TRUE	-0.0935766	1579	Auxiliary
Node1473	ON273283.1	13071	ORF1a_polyprotein	Mesocricetus auratus	Homo sapiens	Coronaviridae_12	Coronaviridae	TRUE	-0.278092	1579	Replication-associated
Node1473	ON273283.1	21072	ORF1ab_polyprotein	Mesocricetus auratus	Homo sapiens	Coronaviridae_12	Coronaviridae	TRUE	-0.0874892	1579	Replication-associated
Node1473	ON273283.1	828	ORF3a_protein	Mesocricetus auratus	Homo sapiens	Coronaviridae_12	Coronaviridae	TRUE	-0.393531	1579	Auxiliary
Node1473	ON283163.1	13125	ORF1a_polyprotein	Mesocricetus auratus	Homo sapiens	Coronaviridae_12	Coronaviridae	TRUE	-0.966845	1579	Replication-associated
Node1473	ON283163.1	21147	ORF1ab_polyprotein	Mesocricetus auratus	Homo sapiens	Coronaviridae_12	Coronaviridae	TRUE	-0.47375	1579	Replication-associated
Node1473	ON283163.1	828	ORF3a_protein	Mesocricetus auratus	Homo sapiens	Coronaviridae_12	Coronaviridae	TRUE	0.123683	1579	Auxiliary
Node1473	ON283163.1	3702	surface_glycoprotein	Mesocricetus auratus	Homo sapiens	Coronaviridae_12	Coronaviridae	TRUE	-0.571212	1579	Entry
Node1473	ON284703.1	1245	nucleocapsid_phosphoprotein	Mesocricetus auratus	Homo sapiens	Coronaviridae_12	Coronaviridae	TRUE	0.139232	1579	Structural
Node1473	ON284703.1	13125	ORF1a_polyprotein	Mesocricetus auratus	Homo sapiens	Coronaviridae_12	Coronaviridae	TRUE	-0.72443	1579	Replication-associated
Node1473	ON284703.1	21195	ORF1ab_polyprotein	Mesocricetus auratus	Homo sapiens	Coronaviridae_12	Coronaviridae	TRUE	-0.598807	1579	Replication-associated
Node1473	ON284703.1	3705	surface_glycoprotein	Mesocricetus auratus	Homo sapiens	Coronaviridae_12	Coronaviridae	TRUE	0.529053	1579	Entry
Node1473	ON286839.1	1251	nucleocapsid_phosphoprotein	Mesocricetus auratus	Homo sapiens	Coronaviridae_12	Coronaviridae	TRUE	0.175991	1579	Structural
Node1473	ON286839.1	13119	ORF1a_polyprotein	Mesocricetus auratus	Homo sapiens	Coronaviridae_12	Coronaviridae	TRUE	-0.0382074	1579	Replication-associated
Node1473	ON286839.1	21189	ORF1ab_polyprotein	Mesocricetus auratus	Homo sapiens	Coronaviridae_12	Coronaviridae	TRUE	-0.11521	1579	Replication-associated
Node1473	ON286839.1	3702	surface_glycoprotein	Mesocricetus auratus	Homo sapiens	Coronaviridae_12	Coronaviridae	TRUE	1.16431	1579	Entry
Node1473	ON288237.1	13011	ORF1a_polyprotein	Mesocricetus auratus	Homo sapiens	Coronaviridae_12	Coronaviridae	TRUE	0.0662842	1579	Replication-associated
Node1473	ON288237.1	21081	ORF1ab_polyprotein	Mesocricetus auratus	Homo sapiens	Coronaviridae_12	Coronaviridae	TRUE	0.0829395	1579	Replication-associated
Node1473	ON290864.1	13086	ORF1a_polyprotein	Mesocricetus auratus	Homo sapiens	Coronaviridae_12	Coronaviridae	TRUE	-0.666036	1579	Replication-associated
Node1473	ON290864.1	21069	ORF1ab_polyprotein	Mesocricetus auratus	Homo sapiens	Coronaviridae_12	Coronaviridae	TRUE	-0.620681	1579	Replication-associated
Node1473	ON290864.1	825	ORF3a_protein	Mesocricetus auratus	Homo sapiens	Coronaviridae_12	Coronaviridae	TRUE	-0.393184	1579	Auxiliary
Node1473	ON290864.1	3669	surface_glycoprotein	Mesocricetus auratus	Homo sapiens	Coronaviridae_12	Coronaviridae	TRUE	-0.0236538	1579	Entry
Node1473	ON291185.1	1248	nucleocapsid_phosphoprotein	Mesocricetus auratus	Homo sapiens	Coronaviridae_12	Coronaviridae	TRUE	-0.266015	1579	Structural
Node1473	ON291185.1	13125	ORF1a_polyprotein	Mesocricetus auratus	Homo sapiens	Coronaviridae_12	Coronaviridae	TRUE	-0.170172	1579	Replication-associated
Node1473	ON291185.1	21195	ORF1ab_polyprotein	Mesocricetus auratus	Homo sapiens	Coronaviridae_12	Coronaviridae	TRUE	-0.0840925	1579	Replication-associated
Node1473	ON291400.1	13125	ORF1a_polyprotein	Mesocricetus auratus	Homo sapiens	Coronaviridae_12	Coronaviridae	TRUE	-0.0519417	1579	Replication-associated
Node1473	ON291400.1	21195	ORF1ab_polyprotein	Mesocricetus auratus	Homo sapiens	Coronaviridae_12	Coronaviridae	TRUE	-0.0259884	1579	Replication-associated
Node1473	ON291400.1	3702	surface_glycoprotein	Mesocricetus auratus	Homo sapiens	Coronaviridae_12	Coronaviridae	TRUE	0.230907	1579	Entry
Node1473	ON291624.1	21195	ORF1ab_polyprotein	Mesocricetus auratus	Homo sapiens	Coronaviridae_12	Coronaviridae	TRUE	-0.270558	1579	Replication-associated
Node1473	ON298328.1	13110	ORF1a_polyprotein	Mesocricetus auratus	Homo sapiens	Coronaviridae_12	Coronaviridae	TRUE	-0.865934	1579	Replication-associated
Node1473	ON298328.1	21180	ORF1ab_polyprotein	Mesocricetus auratus	Homo sapiens	Coronaviridae_12	Coronaviridae	TRUE	-0.170279	1579	Replication-associated
Node1473	ON298328.1	828	ORF3a_protein	Mesocricetus auratus	Homo sapiens	Coronaviridae_12	Coronaviridae	TRUE	-0.393531	1579	Auxiliary
Node1473	ON298368.1	12945	ORF1a_polyprotein	Mesocricetus auratus	Homo sapiens	Coronaviridae_12	Coronaviridae	TRUE	-0.866392	1579	Replication-associated
Node1473	ON298368.1	20829	ORF1ab_polyprotein	Mesocricetus auratus	Homo sapiens	Coronaviridae_12	Coronaviridae	TRUE	-0.170776	1579	Replication-associated
Node1473	ON298368.1	828	ORF3a_protein	Mesocricetus auratus	Homo sapiens	Coronaviridae_12	Coronaviridae	TRUE	-0.393531	1579	Auxiliary
Node1473	ON302292.1	13125	ORF1a_polyprotein	Mesocricetus auratus	Homo sapiens	Coronaviridae_12	Coronaviridae	TRUE	-0.736522	1579	Replication-associated
Node1473	ON302292.1	21195	ORF1ab_polyprotein	Mesocricetus auratus	Homo sapiens	Coronaviridae_12	Coronaviridae	TRUE	-0.356424	1579	Replication-associated
Node1473	ON302292.1	828	ORF3a_protein	Mesocricetus auratus	Homo sapiens	Coronaviridae_12	Coronaviridae	TRUE	-0.393531	1579	Auxiliary
Node1473	ON302292.1	3702	surface_glycoprotein	Mesocricetus auratus	Homo sapiens	Coronaviridae_12	Coronaviridae	TRUE	-0.269603	1579	Entry
Node1473	ON302300.1	13125	ORF1a_polyprotein	Mesocricetus auratus	Homo sapiens	Coronaviridae_12	Coronaviridae	TRUE	-0.755075	1579	Replication-associated
Node1473	ON302300.1	21195	ORF1ab_polyprotein	Mesocricetus auratus	Homo sapiens	Coronaviridae_12	Coronaviridae	TRUE	-0.23101	1579	Replication-associated
Node1473	ON302300.1	828	ORF3a_protein	Mesocricetus auratus	Homo sapiens	Coronaviridae_12	Coronaviridae	TRUE	-0.695822	1579	Auxiliary
Node1473	ON302300.1	3696	surface_glycoprotein	Mesocricetus auratus	Homo sapiens	Coronaviridae_12	Coronaviridae	TRUE	0.0316587	1579	Entry
Node1473	ON302852.1	21195	ORF1ab_polyprotein	Mesocricetus auratus	Homo sapiens	Coronaviridae_12	Coronaviridae	TRUE	-0.916834	1579	Replication-associated
Node1473	ON302853.1	13125	ORF1a_polyprotein	Mesocricetus auratus	Homo sapiens	Coronaviridae_12	Coronaviridae	TRUE	-1.02899	1579	Replication-associated
Node1473	ON302853.1	21195	ORF1ab_polyprotein	Mesocricetus auratus	Homo sapiens	Coronaviridae_12	Coronaviridae	TRUE	-0.241632	1579	Replication-associated
Node1473	ON302853.1	828	ORF3a_protein	Mesocricetus auratus	Homo sapiens	Coronaviridae_12	Coronaviridae	TRUE	-0.393531	1579	Auxiliary
Node1473	ON303060.1	1209	nucleocapsid_phosphoprotein	Mesocricetus auratus	Homo sapiens	Coronaviridae_12	Coronaviridae	TRUE	-0.0200045	1579	Structural
Node1473	ON303071.1	21195	ORF1ab_polyprotein	Mesocricetus auratus	Homo sapiens	Coronaviridae_12	Coronaviridae	TRUE	0.0305032	1579	Replication-associated
Node1473	ON313844.1	669	membrane_glycoprotein	Mesocricetus auratus	Homo sapiens	Coronaviridae_12	Coronaviridae	TRUE	-0.0174458	1579	Structural
Node1473	ON313844.1	1251	nucleocapsid_phosphoprotein	Mesocricetus auratus	Homo sapiens	Coronaviridae_12	Coronaviridae	TRUE	0.283157	1579	Structural
Node1473	ON313844.1	13125	ORF1a_polyprotein	Mesocricetus auratus	Homo sapiens	Coronaviridae_12	Coronaviridae	TRUE	-0.263701	1579	Replication-associated
Node1473	ON313844.1	21195	ORF1ab_polyprotein	Mesocricetus auratus	Homo sapiens	Coronaviridae_12	Coronaviridae	TRUE	-0.191278	1579	Replication-associated
Node1473	ON313844.1	828	ORF3a_protein	Mesocricetus auratus	Homo sapiens	Coronaviridae_12	Coronaviridae	TRUE	0.01911	1579	Auxiliary
Node1473	ON313844.1	186	ORF6_protein	Mesocricetus auratus	Homo sapiens	Coronaviridae_12	Coronaviridae	TRUE	-0.429324	1579	Auxiliary
Node1473	ON313844.1	3642	surface_glycoprotein	Mesocricetus auratus	Homo sapiens	Coronaviridae_12	Coronaviridae	TRUE	0.769738	1579	Entry
Node1473	ON322657.1	13125	ORF1a_polyprotein	Mesocricetus auratus	Homo sapiens	Coronaviridae_12	Coronaviridae	TRUE	-0.223449	1579	Replication-associated
Node1473	ON322657.1	21195	ORF1ab_polyprotein	Mesocricetus auratus	Homo sapiens	Coronaviridae_12	Coronaviridae	TRUE	-0.174707	1579	Replication-associated
Node1473	ON322657.1	3693	surface_glycoprotein	Mesocricetus auratus	Homo sapiens	Coronaviridae_12	Coronaviridae	TRUE	0.0757224	1579	Entry
Node1473	ON392523.1	669	membrane_glycoprotein	Mesocricetus auratus	Homo sapiens	Coronaviridae_12	Coronaviridae	TRUE	-0.0174458	1579	Structural
Node1473	ON392523.1	1251	nucleocapsid_phosphoprotein	Mesocricetus auratus	Homo sapiens	Coronaviridae_12	Coronaviridae	TRUE	0.0885096	1579	Structural
Node1473	ON392523.1	13125	ORF1a_polyprotein	Mesocricetus auratus	Homo sapiens	Coronaviridae_12	Coronaviridae	TRUE	-0.11902	1579	Replication-associated
Node1473	ON392523.1	21192	ORF1ab_polyprotein	Mesocricetus auratus	Homo sapiens	Coronaviridae_12	Coronaviridae	TRUE	-0.0761157	1579	Replication-associated
Node1473	ON392523.1	828	ORF3a_protein	Mesocricetus auratus	Homo sapiens	Coronaviridae_12	Coronaviridae	TRUE	0.0190952	1579	Auxiliary
Node1473	ON392523.1	186	ORF6_protein	Mesocricetus auratus	Homo sapiens	Coronaviridae_12	Coronaviridae	TRUE	-0.429324	1579	Auxiliary
Node1473	ON392523.1	3705	surface_glycoprotein	Mesocricetus auratus	Homo sapiens	Coronaviridae_12	Coronaviridae	TRUE	0.77167	1579	Entry
Node1473	ON419328.1	669	membrane_glycoprotein	Mesocricetus auratus	Homo sapiens	Coronaviridae_12	Coronaviridae	TRUE	-0.0174458	1579	Structural
Node1473	ON419328.1	1251	nucleocapsid_phosphoprotein	Mesocricetus auratus	Homo sapiens	Coronaviridae_12	Coronaviridae	TRUE	0.283157	1579	Structural
Node1473	ON419328.1	13122	ORF1a_polyprotein	Mesocricetus auratus	Homo sapiens	Coronaviridae_12	Coronaviridae	TRUE	0.00319285	1579	Replication-associated
Node1473	ON419328.1	21192	ORF1ab_polyprotein	Mesocricetus auratus	Homo sapiens	Coronaviridae_12	Coronaviridae	TRUE	0.0128492	1579	Replication-associated
Node1473	ON419328.1	828	ORF3a_protein	Mesocricetus auratus	Homo sapiens	Coronaviridae_12	Coronaviridae	TRUE	-0.282724	1579	Auxiliary
Node1473	ON419328.1	186	ORF6_protein	Mesocricetus auratus	Homo sapiens	Coronaviridae_12	Coronaviridae	TRUE	-0.429324	1579	Auxiliary
Node1473	ON419328.1	3705	surface_glycoprotein	Mesocricetus auratus	Homo sapiens	Coronaviridae_12	Coronaviridae	TRUE	1.06001	1579	Entry
Node1473	ON430740.1	13122	ORF1a_polyprotein	Mesocricetus auratus	Homo sapiens	Coronaviridae_12	Coronaviridae	TRUE	-0.0108795	1579	Replication-associated
Node1473	ON430740.1	21147	ORF1ab_polyprotein	Mesocricetus auratus	Homo sapiens	Coronaviridae_12	Coronaviridae	TRUE	0.0828917	1579	Replication-associated
Node1473	ON430740.1	3705	surface_glycoprotein	Mesocricetus auratus	Homo sapiens	Coronaviridae_12	Coronaviridae	TRUE	0.230607	1579	Entry
Node1473	ON431846.1	13122	ORF1a_polyprotein	Mesocricetus auratus	Homo sapiens	Coronaviridae_12	Coronaviridae	TRUE	-0.0748788	1579	Replication-associated
Node1473	ON431846.1	21147	ORF1ab_polyprotein	Mesocricetus auratus	Homo sapiens	Coronaviridae_12	Coronaviridae	TRUE	0.111221	1579	Replication-associated
Node1473	ON433890.1	13113	ORF1a_polyprotein	Mesocricetus auratus	Homo sapiens	Coronaviridae_12	Coronaviridae	TRUE	0.170197	1579	Replication-associated
Node1473	ON433890.1	21006	ORF1ab_polyprotein	Mesocricetus auratus	Homo sapiens	Coronaviridae_12	Coronaviridae	TRUE	0.0038268	1579	Replication-associated
Node1473	ON433890.1	828	ORF3a_protein	Mesocricetus auratus	Homo sapiens	Coronaviridae_12	Coronaviridae	TRUE	-0.281561	1579	Auxiliary
Node1473	ON433890.1	3681	surface_glycoprotein	Mesocricetus auratus	Homo sapiens	Coronaviridae_12	Coronaviridae	TRUE	0.579046	1579	Entry
Node1473	ON438380.1	13125	ORF1a_polyprotein	Mesocricetus auratus	Homo sapiens	Coronaviridae_12	Coronaviridae	TRUE	0.182421	1579	Replication-associated
Node1473	ON438380.1	21195	ORF1ab_polyprotein	Mesocricetus auratus	Homo sapiens	Coronaviridae_12	Coronaviridae	TRUE	0.178036	1579	Replication-associated
Node1473	ON442575.1	1251	nucleocapsid_phosphoprotein	Mesocricetus auratus	Homo sapiens	Coronaviridae_12	Coronaviridae	TRUE	0.310142	1579	Structural
Node1473	ON442575.1	13092	ORF1a_polyprotein	Mesocricetus auratus	Homo sapiens	Coronaviridae_12	Coronaviridae	TRUE	-0.151398	1579	Replication-associated
Node1473	ON442575.1	21141	ORF1ab_polyprotein	Mesocricetus auratus	Homo sapiens	Coronaviridae_12	Coronaviridae	TRUE	-0.062481	1579	Replication-associated
Node1473	ON442575.1	3351	surface_glycoprotein	Mesocricetus auratus	Homo sapiens	Coronaviridae_12	Coronaviridae	TRUE	1.04975	1579	Entry
Node1473	ON459198.1	13122	ORF1a_polyprotein	Mesocricetus auratus	Homo sapiens	Coronaviridae_12	Coronaviridae	TRUE	-0.151277	1579	Replication-associated
Node1473	ON459198.1	21192	ORF1ab_polyprotein	Mesocricetus auratus	Homo sapiens	Coronaviridae_12	Coronaviridae	TRUE	0.0258557	1579	Replication-associated
Node1473	ON459335.1	13125	ORF1a_polyprotein	Mesocricetus auratus	Homo sapiens	Coronaviridae_12	Coronaviridae	TRUE	-0.156344	1579	Replication-associated
Node1473	ON459335.1	21195	ORF1ab_polyprotein	Mesocricetus auratus	Homo sapiens	Coronaviridae_12	Coronaviridae	TRUE	-0.0371043	1579	Replication-associated
Node1473	ON482375.1	1248	nucleocapsid_phosphoprotein	Mesocricetus auratus	Homo sapiens	Coronaviridae_12	Coronaviridae	TRUE	0.345574	1579	Structural
Node1473	ON482375.1	13125	ORF1a_polyprotein	Mesocricetus auratus	Homo sapiens	Coronaviridae_12	Coronaviridae	TRUE	-0.0970615	1579	Replication-associated
Node1473	ON482375.1	21195	ORF1ab_polyprotein	Mesocricetus auratus	Homo sapiens	Coronaviridae_12	Coronaviridae	TRUE	-0.0564264	1579	Replication-associated
Node1473	ON482487.1	13125	ORF1a_polyprotein	Mesocricetus auratus	Homo sapiens	Coronaviridae_12	Coronaviridae	TRUE	-0.302455	1579	Replication-associated
Node1473	ON482487.1	21195	ORF1ab_polyprotein	Mesocricetus auratus	Homo sapiens	Coronaviridae_12	Coronaviridae	TRUE	-0.026434	1579	Replication-associated
Node1473	ON482747.1	669	membrane_glycoprotein	Mesocricetus auratus	Homo sapiens	Coronaviridae_12	Coronaviridae	TRUE	-0.265973	1579	Structural
Node1473	ON482747.1	1248	nucleocapsid_phosphoprotein	Mesocricetus auratus	Homo sapiens	Coronaviridae_12	Coronaviridae	TRUE	0.253789	1579	Structural
Node1473	ON482747.1	13125	ORF1a_polyprotein	Mesocricetus auratus	Homo sapiens	Coronaviridae_12	Coronaviridae	TRUE	-0.198854	1579	Replication-associated
Node1473	ON482747.1	21171	ORF1ab_polyprotein	Mesocricetus auratus	Homo sapiens	Coronaviridae_12	Coronaviridae	TRUE	-0.0168839	1579	Replication-associated
Node1473	ON483807.1	13125	ORF1a_polyprotein	Mesocricetus auratus	Homo sapiens	Coronaviridae_12	Coronaviridae	TRUE	-0.0351064	1579	Replication-associated
Node1473	ON483807.1	21195	ORF1ab_polyprotein	Mesocricetus auratus	Homo sapiens	Coronaviridae_12	Coronaviridae	TRUE	0.0565256	1579	Replication-associated
Node1473	ON483937.1	669	membrane_glycoprotein	Mesocricetus auratus	Homo sapiens	Coronaviridae_12	Coronaviridae	TRUE	-0.607681	1579	Structural
Node1473	ON483937.1	1248	nucleocapsid_phosphoprotein	Mesocricetus auratus	Homo sapiens	Coronaviridae_12	Coronaviridae	TRUE	0.253789	1579	Structural
Node1473	ON483937.1	13125	ORF1a_polyprotein	Mesocricetus auratus	Homo sapiens	Coronaviridae_12	Coronaviridae	TRUE	0.00312735	1579	Replication-associated
Node1473	ON483937.1	21195	ORF1ab_polyprotein	Mesocricetus auratus	Homo sapiens	Coronaviridae_12	Coronaviridae	TRUE	0.250897	1579	Replication-associated
Node1473	ON483937.1	3705	surface_glycoprotein	Mesocricetus auratus	Homo sapiens	Coronaviridae_12	Coronaviridae	TRUE	0.610557	1579	Entry
Node1473	ON485156.1	1248	nucleocapsid_phosphoprotein	Mesocricetus auratus	Homo sapiens	Coronaviridae_12	Coronaviridae	TRUE	0.345306	1579	Structural
Node1473	ON485156.1	13122	ORF1a_polyprotein	Mesocricetus auratus	Homo sapiens	Coronaviridae_12	Coronaviridae	TRUE	-0.097131	1579	Replication-associated
Node1473	ON485156.1	21192	ORF1ab_polyprotein	Mesocricetus auratus	Homo sapiens	Coronaviridae_12	Coronaviridae	TRUE	0.105467	1579	Replication-associated
Node1473	ON485198.1	13125	ORF1a_polyprotein	Mesocricetus auratus	Homo sapiens	Coronaviridae_12	Coronaviridae	TRUE	0.0662133	1579	Replication-associated
Node1473	ON485198.1	21195	ORF1ab_polyprotein	Mesocricetus auratus	Homo sapiens	Coronaviridae_12	Coronaviridae	TRUE	0.149632	1579	Replication-associated
Node1473	ON485198.1	3705	surface_glycoprotein	Mesocricetus auratus	Homo sapiens	Coronaviridae_12	Coronaviridae	TRUE	0.495086	1579	Entry
Node1473	ON486649.1	13116	ORF1a_polyprotein	Mesocricetus auratus	Homo sapiens	Coronaviridae_12	Coronaviridae	TRUE	-0.21286	1579	Replication-associated
Node1473	ON486649.1	21186	ORF1ab_polyprotein	Mesocricetus auratus	Homo sapiens	Coronaviridae_12	Coronaviridae	TRUE	-0.0134739	1579	Replication-associated
Node1473	ON486649.1	3705	surface_glycoprotein	Mesocricetus auratus	Homo sapiens	Coronaviridae_12	Coronaviridae	TRUE	0.262437	1579	Entry
Node1473	ON486889.1	1248	nucleocapsid_phosphoprotein	Mesocricetus auratus	Homo sapiens	Coronaviridae_12	Coronaviridae	TRUE	0.138668	1579	Structural
Node1473	ON486889.1	13125	ORF1a_polyprotein	Mesocricetus auratus	Homo sapiens	Coronaviridae_12	Coronaviridae	TRUE	-0.302455	1579	Replication-associated
Node1473	ON486889.1	21195	ORF1ab_polyprotein	Mesocricetus auratus	Homo sapiens	Coronaviridae_12	Coronaviridae	TRUE	-0.175448	1579	Replication-associated
Node1473	ON532082.1	669	membrane_glycoprotein	Mesocricetus auratus	Homo sapiens	Coronaviridae_12	Coronaviridae	TRUE	-0.379534	1579	Structural
Node1473	ON532082.1	13125	ORF1a_polyprotein	Mesocricetus auratus	Homo sapiens	Coronaviridae_12	Coronaviridae	TRUE	-0.447912	1579	Replication-associated
Node1473	ON532082.1	21195	ORF1ab_polyprotein	Mesocricetus auratus	Homo sapiens	Coronaviridae_12	Coronaviridae	TRUE	0.099895	1579	Replication-associated
Node1473	ON532082.1	828	ORF3a_protein	Mesocricetus auratus	Homo sapiens	Coronaviridae_12	Coronaviridae	TRUE	-0.281561	1579	Auxiliary
Node1473	ON532082.1	3702	surface_glycoprotein	Mesocricetus auratus	Homo sapiens	Coronaviridae_12	Coronaviridae	TRUE	0.502795	1579	Entry
Node1473	ON574646.1	1248	nucleocapsid_phosphoprotein	Mesocricetus auratus	Homo sapiens	Coronaviridae_12	Coronaviridae	TRUE	0.0433189	1579	Structural
Node1473	ON574646.1	13116	ORF1a_polyprotein	Mesocricetus auratus	Homo sapiens	Coronaviridae_12	Coronaviridae	TRUE	-0.870775	1579	Replication-associated
Node1473	ON574646.1	21186	ORF1ab_polyprotein	Mesocricetus auratus	Homo sapiens	Coronaviridae_12	Coronaviridae	TRUE	-0.678767	1579	Replication-associated
Node1473	ON574646.1	828	ORF3a_protein	Mesocricetus auratus	Homo sapiens	Coronaviridae_12	Coronaviridae	TRUE	-0.282709	1579	Auxiliary
Node1473	ON578778.1	13125	ORF1a_polyprotein	Mesocricetus auratus	Homo sapiens	Coronaviridae_12	Coronaviridae	TRUE	-0.244044	1579	Replication-associated
Node1473	ON578778.1	21195	ORF1ab_polyprotein	Mesocricetus auratus	Homo sapiens	Coronaviridae_12	Coronaviridae	TRUE	-0.127239	1579	Replication-associated
Node1473	ON578778.1	366	ORF7a_protein	Mesocricetus auratus	Homo sapiens	Coronaviridae_12	Coronaviridae	TRUE	0.0430108	1579	Auxiliary
Node1473	ON583170.1	1251	nucleocapsid_phosphoprotein	Mesocricetus auratus	Homo sapiens	Coronaviridae_12	Coronaviridae	TRUE	0.175991	1579	Structural
Node1473	ON583170.1	13119	ORF1a_polyprotein	Mesocricetus auratus	Homo sapiens	Coronaviridae_12	Coronaviridae	TRUE	-0.234084	1579	Replication-associated
Node1473	ON583170.1	21189	ORF1ab_polyprotein	Mesocricetus auratus	Homo sapiens	Coronaviridae_12	Coronaviridae	TRUE	-0.11521	1579	Replication-associated
Node1473	ON583170.1	3702	surface_glycoprotein	Mesocricetus auratus	Homo sapiens	Coronaviridae_12	Coronaviridae	TRUE	1.14971	1579	Entry
Node1473	ON599914.1	669	membrane_glycoprotein	Mesocricetus auratus	Homo sapiens	Coronaviridae_12	Coronaviridae	TRUE	-0.0174458	1579	Structural
Node1473	ON599914.1	1251	nucleocapsid_phosphoprotein	Mesocricetus auratus	Homo sapiens	Coronaviridae_12	Coronaviridae	TRUE	0.283157	1579	Structural
Node1473	ON599914.1	13125	ORF1a_polyprotein	Mesocricetus auratus	Homo sapiens	Coronaviridae_12	Coronaviridae	TRUE	0.00845732	1579	Replication-associated
Node1473	ON599914.1	21195	ORF1ab_polyprotein	Mesocricetus auratus	Homo sapiens	Coronaviridae_12	Coronaviridae	TRUE	0.0153381	1579	Replication-associated
Node1473	ON599914.1	828	ORF3a_protein	Mesocricetus auratus	Homo sapiens	Coronaviridae_12	Coronaviridae	TRUE	-0.282724	1579	Auxiliary
Node1473	ON599914.1	186	ORF6_protein	Mesocricetus auratus	Homo sapiens	Coronaviridae_12	Coronaviridae	TRUE	-0.429324	1579	Auxiliary
Node1473	ON599914.1	3705	surface_glycoprotein	Mesocricetus auratus	Homo sapiens	Coronaviridae_12	Coronaviridae	TRUE	1.09643	1579	Entry
Node1473	ON599951.1	669	membrane_glycoprotein	Mesocricetus auratus	Homo sapiens	Coronaviridae_12	Coronaviridae	TRUE	-0.0174458	1579	Structural
Node1473	ON599951.1	1251	nucleocapsid_phosphoprotein	Mesocricetus auratus	Homo sapiens	Coronaviridae_12	Coronaviridae	TRUE	0.283157	1579	Structural
Node1473	ON599951.1	13125	ORF1a_polyprotein	Mesocricetus auratus	Homo sapiens	Coronaviridae_12	Coronaviridae	TRUE	-0.0373533	1579	Replication-associated
Node1473	ON599951.1	21195	ORF1ab_polyprotein	Mesocricetus auratus	Homo sapiens	Coronaviridae_12	Coronaviridae	TRUE	-0.0189592	1579	Replication-associated
Node1473	ON599951.1	828	ORF3a_protein	Mesocricetus auratus	Homo sapiens	Coronaviridae_12	Coronaviridae	TRUE	-0.282724	1579	Auxiliary
Node1473	ON599951.1	186	ORF6_protein	Mesocricetus auratus	Homo sapiens	Coronaviridae_12	Coronaviridae	TRUE	-0.429324	1579	Auxiliary
Node1473	ON599951.1	3705	surface_glycoprotein	Mesocricetus auratus	Homo sapiens	Coronaviridae_12	Coronaviridae	TRUE	1.09643	1579	Entry
Node1473	ON600263.1	1251	nucleocapsid_phosphoprotein	Mesocricetus auratus	Homo sapiens	Coronaviridae_12	Coronaviridae	TRUE	0.175991	1579	Structural
Node1473	ON600263.1	13119	ORF1a_polyprotein	Mesocricetus auratus	Homo sapiens	Coronaviridae_12	Coronaviridae	TRUE	-0.233916	1579	Replication-associated
Node1473	ON600263.1	21189	ORF1ab_polyprotein	Mesocricetus auratus	Homo sapiens	Coronaviridae_12	Coronaviridae	TRUE	-0.175104	1579	Replication-associated
Node1473	ON600263.1	3702	surface_glycoprotein	Mesocricetus auratus	Homo sapiens	Coronaviridae_12	Coronaviridae	TRUE	0.827489	1579	Entry
Node1473	ON601338.1	13122	ORF1a_polyprotein	Mesocricetus auratus	Homo sapiens	Coronaviridae_12	Coronaviridae	TRUE	-0.0396035	1579	Replication-associated
Node1473	ON601338.1	21189	ORF1ab_polyprotein	Mesocricetus auratus	Homo sapiens	Coronaviridae_12	Coronaviridae	TRUE	0.242472	1579	Replication-associated
Node1473	ON601338.1	360	ORF8_protein	Mesocricetus auratus	Homo sapiens	Coronaviridae_12	Coronaviridae	TRUE	-0.026611	1579	Auxiliary
Node1473	ON637175.1	13122	ORF1a_polyprotein	Mesocricetus auratus	Homo sapiens	Coronaviridae_12	Coronaviridae	TRUE	-0.470644	1579	Replication-associated
Node1473	ON637175.1	21192	ORF1ab_polyprotein	Mesocricetus auratus	Homo sapiens	Coronaviridae_12	Coronaviridae	TRUE	-0.327549	1579	Replication-associated
Node1473	ON637175.1	3702	surface_glycoprotein	Mesocricetus auratus	Homo sapiens	Coronaviridae_12	Coronaviridae	TRUE	0.880693	1579	Entry
Node1473	ON647501.1	669	membrane_glycoprotein	Mesocricetus auratus	Homo sapiens	Coronaviridae_12	Coronaviridae	TRUE	-0.0174458	1579	Structural
Node1473	ON647501.1	1251	nucleocapsid_phosphoprotein	Mesocricetus auratus	Homo sapiens	Coronaviridae_12	Coronaviridae	TRUE	0.391457	1579	Structural
Node1473	ON647501.1	13116	ORF1a_polyprotein	Mesocricetus auratus	Homo sapiens	Coronaviridae_12	Coronaviridae	TRUE	-0.235203	1579	Replication-associated
Node1473	ON647501.1	21186	ORF1ab_polyprotein	Mesocricetus auratus	Homo sapiens	Coronaviridae_12	Coronaviridae	TRUE	-0.151756	1579	Replication-associated
Node1473	ON647501.1	828	ORF3a_protein	Mesocricetus auratus	Homo sapiens	Coronaviridae_12	Coronaviridae	TRUE	-0.282724	1579	Auxiliary
Node1473	ON647501.1	186	ORF6_protein	Mesocricetus auratus	Homo sapiens	Coronaviridae_12	Coronaviridae	TRUE	-0.429324	1579	Auxiliary
Node1473	ON647501.1	132	ORF7b	Mesocricetus auratus	Homo sapiens	Coronaviridae_12	Coronaviridae	TRUE	-0.410536	1579	Auxiliary
Node1473	ON647501.1	3708	surface_glycoprotein	Mesocricetus auratus	Homo sapiens	Coronaviridae_12	Coronaviridae	TRUE	1.10141	1579	Entry
Node1473	ON647556.1	669	membrane_glycoprotein	Mesocricetus auratus	Homo sapiens	Coronaviridae_12	Coronaviridae	TRUE	-0.0174458	1579	Structural
Node1473	ON647556.1	1251	nucleocapsid_phosphoprotein	Mesocricetus auratus	Homo sapiens	Coronaviridae_12	Coronaviridae	TRUE	0.283157	1579	Structural
Node1473	ON647556.1	13122	ORF1a_polyprotein	Mesocricetus auratus	Homo sapiens	Coronaviridae_12	Coronaviridae	TRUE	-0.155774	1579	Replication-associated
Node1473	ON647556.1	21192	ORF1ab_polyprotein	Mesocricetus auratus	Homo sapiens	Coronaviridae_12	Coronaviridae	TRUE	-0.151678	1579	Replication-associated
Node1473	ON647556.1	825	ORF3a_protein	Mesocricetus auratus	Homo sapiens	Coronaviridae_12	Coronaviridae	TRUE	-0.282674	1579	Auxiliary
Node1473	ON647556.1	186	ORF6_protein	Mesocricetus auratus	Homo sapiens	Coronaviridae_12	Coronaviridae	TRUE	-0.429324	1579	Auxiliary
Node1473	ON647556.1	3705	surface_glycoprotein	Mesocricetus auratus	Homo sapiens	Coronaviridae_12	Coronaviridae	TRUE	1.07688	1579	Entry
Node1473	ON647563.1	21195	ORF1ab_polyprotein	Mesocricetus auratus	Homo sapiens	Coronaviridae_12	Coronaviridae	TRUE	-0.74776	1579	Replication-associated
Node1473	ON647586.1	669	membrane_glycoprotein	Mesocricetus auratus	Homo sapiens	Coronaviridae_12	Coronaviridae	TRUE	-0.0174458	1579	Structural
Node1473	ON647586.1	1251	nucleocapsid_phosphoprotein	Mesocricetus auratus	Homo sapiens	Coronaviridae_12	Coronaviridae	TRUE	0.391457	1579	Structural
Node1473	ON647586.1	13113	ORF1a_polyprotein	Mesocricetus auratus	Homo sapiens	Coronaviridae_12	Coronaviridae	TRUE	-0.302276	1579	Replication-associated
Node1473	ON647586.1	21183	ORF1ab_polyprotein	Mesocricetus auratus	Homo sapiens	Coronaviridae_12	Coronaviridae	TRUE	-0.248814	1579	Replication-associated
Node1473	ON647586.1	828	ORF3a_protein	Mesocricetus auratus	Homo sapiens	Coronaviridae_12	Coronaviridae	TRUE	-0.282724	1579	Auxiliary
Node1473	ON647586.1	186	ORF6_protein	Mesocricetus auratus	Homo sapiens	Coronaviridae_12	Coronaviridae	TRUE	-0.429324	1579	Auxiliary
Node1473	ON647586.1	132	ORF7b	Mesocricetus auratus	Homo sapiens	Coronaviridae_12	Coronaviridae	TRUE	-0.410536	1579	Auxiliary
Node1473	ON647586.1	3708	surface_glycoprotein	Mesocricetus auratus	Homo sapiens	Coronaviridae_12	Coronaviridae	TRUE	1.08685	1579	Entry
Node1473	ON651664.1	1251	nucleocapsid_phosphoprotein	Mesocricetus auratus	Homo sapiens	Coronaviridae_12	Coronaviridae	TRUE	0.175991	1579	Structural
Node1473	ON651664.1	13119	ORF1a_polyprotein	Mesocricetus auratus	Homo sapiens	Coronaviridae_12	Coronaviridae	TRUE	-0.2697	1579	Replication-associated
Node1473	ON651664.1	21189	ORF1ab_polyprotein	Mesocricetus auratus	Homo sapiens	Coronaviridae_12	Coronaviridae	TRUE	-0.275835	1579	Replication-associated
Node1473	ON651664.1	3702	surface_glycoprotein	Mesocricetus auratus	Homo sapiens	Coronaviridae_12	Coronaviridae	TRUE	1.1327	1579	Entry
Node1473	ON683037.1	669	membrane_glycoprotein	Mesocricetus auratus	Homo sapiens	Coronaviridae_12	Coronaviridae	TRUE	0.17796	1579	Structural
Node1473	ON683037.1	1251	nucleocapsid_phosphoprotein	Mesocricetus auratus	Homo sapiens	Coronaviridae_12	Coronaviridae	TRUE	-0.0197903	1579	Structural
Node1473	ON683037.1	13119	ORF1a_polyprotein	Mesocricetus auratus	Homo sapiens	Coronaviridae_12	Coronaviridae	TRUE	-0.0374682	1579	Replication-associated
Node1473	ON683037.1	21186	ORF1ab_polyprotein	Mesocricetus auratus	Homo sapiens	Coronaviridae_12	Coronaviridae	TRUE	-0.0866738	1579	Replication-associated
Node1473	ON683037.1	828	ORF3a_protein	Mesocricetus auratus	Homo sapiens	Coronaviridae_12	Coronaviridae	TRUE	0.01911	1579	Auxiliary
Node1473	ON683037.1	186	ORF6_protein	Mesocricetus auratus	Homo sapiens	Coronaviridae_12	Coronaviridae	TRUE	-0.429324	1579	Auxiliary
Node1473	ON683037.1	3702	surface_glycoprotein	Mesocricetus auratus	Homo sapiens	Coronaviridae_12	Coronaviridae	TRUE	0.578262	1579	Entry
Node1473	ON683052.1	669	membrane_glycoprotein	Mesocricetus auratus	Homo sapiens	Coronaviridae_12	Coronaviridae	TRUE	-0.0174458	1579	Structural
Node1473	ON683052.1	1251	nucleocapsid_phosphoprotein	Mesocricetus auratus	Homo sapiens	Coronaviridae_12	Coronaviridae	TRUE	0.283157	1579	Structural
Node1473	ON683052.1	13125	ORF1a_polyprotein	Mesocricetus auratus	Homo sapiens	Coronaviridae_12	Coronaviridae	TRUE	-0.039745	1579	Replication-associated
Node1473	ON683052.1	21192	ORF1ab_polyprotein	Mesocricetus auratus	Homo sapiens	Coronaviridae_12	Coronaviridae	TRUE	-0.0180599	1579	Replication-associated
Node1473	ON683052.1	828	ORF3a_protein	Mesocricetus auratus	Homo sapiens	Coronaviridae_12	Coronaviridae	TRUE	0.0190952	1579	Auxiliary
Node1473	ON683052.1	186	ORF6_protein	Mesocricetus auratus	Homo sapiens	Coronaviridae_12	Coronaviridae	TRUE	-0.429324	1579	Auxiliary
Node1473	ON683052.1	132	ORF7b	Mesocricetus auratus	Homo sapiens	Coronaviridae_12	Coronaviridae	TRUE	-0.250169	1579	Auxiliary
Node1473	ON683052.1	3699	surface_glycoprotein	Mesocricetus auratus	Homo sapiens	Coronaviridae_12	Coronaviridae	TRUE	1.04301	1579	Entry
Node1473	ON703259.1	13125	ORF1a_polyprotein	Mesocricetus auratus	Homo sapiens	Coronaviridae_12	Coronaviridae	TRUE	0.304408	1579	Replication-associated
Node1473	ON703259.1	21195	ORF1ab_polyprotein	Mesocricetus auratus	Homo sapiens	Coronaviridae_12	Coronaviridae	TRUE	0.526431	1579	Replication-associated
Node1473	ON745569.1	1248	nucleocapsid_phosphoprotein	Mesocricetus auratus	Homo sapiens	Coronaviridae_12	Coronaviridae	TRUE	0.2543	1579	Structural
Node1473	ON745569.1	13125	ORF1a_polyprotein	Mesocricetus auratus	Homo sapiens	Coronaviridae_12	Coronaviridae	TRUE	0.0120554	1579	Replication-associated
Node1473	ON745569.1	21195	ORF1ab_polyprotein	Mesocricetus auratus	Homo sapiens	Coronaviridae_12	Coronaviridae	TRUE	-0.0427028	1579	Replication-associated
Node1473	ON755447.1	13125	ORF1a_polyprotein	Mesocricetus auratus	Homo sapiens	Coronaviridae_12	Coronaviridae	TRUE	-0.461357	1579	Replication-associated
Node1473	ON755447.1	21195	ORF1ab_polyprotein	Mesocricetus auratus	Homo sapiens	Coronaviridae_12	Coronaviridae	TRUE	-0.314699	1579	Replication-associated
Node1473	ON755447.1	3705	surface_glycoprotein	Mesocricetus auratus	Homo sapiens	Coronaviridae_12	Coronaviridae	TRUE	0.433879	1579	Entry
Node1473	ON755523.1	13125	ORF1a_polyprotein	Mesocricetus auratus	Homo sapiens	Coronaviridae_12	Coronaviridae	TRUE	-0.240725	1579	Replication-associated
Node1473	ON755523.1	21195	ORF1ab_polyprotein	Mesocricetus auratus	Homo sapiens	Coronaviridae_12	Coronaviridae	TRUE	-0.0155576	1579	Replication-associated
Node1473	ON755677.1	13125	ORF1a_polyprotein	Mesocricetus auratus	Homo sapiens	Coronaviridae_12	Coronaviridae	TRUE	-0.302524	1579	Replication-associated
Node1473	ON755677.1	21195	ORF1ab_polyprotein	Mesocricetus auratus	Homo sapiens	Coronaviridae_12	Coronaviridae	TRUE	-0.0508122	1579	Replication-associated
Node1473	ON755677.1	3705	surface_glycoprotein	Mesocricetus auratus	Homo sapiens	Coronaviridae_12	Coronaviridae	TRUE	0.05519	1579	Entry
Node1473	ON755824.1	1248	nucleocapsid_phosphoprotein	Mesocricetus auratus	Homo sapiens	Coronaviridae_12	Coronaviridae	TRUE	0.138668	1579	Structural
Node1473	ON755824.1	13125	ORF1a_polyprotein	Mesocricetus auratus	Homo sapiens	Coronaviridae_12	Coronaviridae	TRUE	-0.099994	1579	Replication-associated
Node1473	ON755824.1	21195	ORF1ab_polyprotein	Mesocricetus auratus	Homo sapiens	Coronaviridae_12	Coronaviridae	TRUE	0.0976879	1579	Replication-associated
Node1473	ON764489.1	13125	ORF1a_polyprotein	Mesocricetus auratus	Homo sapiens	Coronaviridae_12	Coronaviridae	TRUE	-0.073371	1579	Replication-associated
Node1473	ON764489.1	21195	ORF1ab_polyprotein	Mesocricetus auratus	Homo sapiens	Coronaviridae_12	Coronaviridae	TRUE	-0.00156962	1579	Replication-associated
Node1473	ON764489.1	828	ORF3a_protein	Mesocricetus auratus	Homo sapiens	Coronaviridae_12	Coronaviridae	TRUE	-0.28067	1579	Auxiliary
Node1473	ON764489.1	3705	surface_glycoprotein	Mesocricetus auratus	Homo sapiens	Coronaviridae_12	Coronaviridae	TRUE	0.132044	1579	Entry
Node1473	ON764499.1	13125	ORF1a_polyprotein	Mesocricetus auratus	Homo sapiens	Coronaviridae_12	Coronaviridae	TRUE	-0.235849	1579	Replication-associated
Node1473	ON764499.1	21195	ORF1ab_polyprotein	Mesocricetus auratus	Homo sapiens	Coronaviridae_12	Coronaviridae	TRUE	-0.0862285	1579	Replication-associated
Node1473	ON764499.1	828	ORF3a_protein	Mesocricetus auratus	Homo sapiens	Coronaviridae_12	Coronaviridae	TRUE	-0.582146	1579	Auxiliary
Node1473	ON764522.1	13125	ORF1a_polyprotein	Mesocricetus auratus	Homo sapiens	Coronaviridae_12	Coronaviridae	TRUE	-0.156292	1579	Replication-associated
Node1473	ON764522.1	21195	ORF1ab_polyprotein	Mesocricetus auratus	Homo sapiens	Coronaviridae_12	Coronaviridae	TRUE	-0.099883	1579	Replication-associated
Node1473	ON764544.1	13122	ORF1a_polyprotein	Mesocricetus auratus	Homo sapiens	Coronaviridae_12	Coronaviridae	TRUE	-0.297667	1579	Replication-associated
Node1473	ON764544.1	21189	ORF1ab_polyprotein	Mesocricetus auratus	Homo sapiens	Coronaviridae_12	Coronaviridae	TRUE	-0.154912	1579	Replication-associated
Node1473	ON764706.1	669	membrane_glycoprotein	Mesocricetus auratus	Homo sapiens	Coronaviridae_12	Coronaviridae	TRUE	-0.0174458	1579	Structural
Node1473	ON764706.1	1251	nucleocapsid_phosphoprotein	Mesocricetus auratus	Homo sapiens	Coronaviridae_12	Coronaviridae	TRUE	0.283157	1579	Structural
Node1473	ON764706.1	13125	ORF1a_polyprotein	Mesocricetus auratus	Homo sapiens	Coronaviridae_12	Coronaviridae	TRUE	-0.11902	1579	Replication-associated
Node1473	ON764706.1	21195	ORF1ab_polyprotein	Mesocricetus auratus	Homo sapiens	Coronaviridae_12	Coronaviridae	TRUE	-0.0761211	1579	Replication-associated
Node1473	ON764706.1	828	ORF3a_protein	Mesocricetus auratus	Homo sapiens	Coronaviridae_12	Coronaviridae	TRUE	0.0190952	1579	Auxiliary
Node1473	ON764706.1	186	ORF6_protein	Mesocricetus auratus	Homo sapiens	Coronaviridae_12	Coronaviridae	TRUE	-0.429324	1579	Auxiliary
Node1473	ON764706.1	3705	surface_glycoprotein	Mesocricetus auratus	Homo sapiens	Coronaviridae_12	Coronaviridae	TRUE	1.09661	1579	Entry
Node1473	ON779834.1	669	membrane_glycoprotein	Mesocricetus auratus	Homo sapiens	Coronaviridae_12	Coronaviridae	TRUE	-0.0174458	1579	Structural
Node1473	ON779834.1	1251	nucleocapsid_phosphoprotein	Mesocricetus auratus	Homo sapiens	Coronaviridae_12	Coronaviridae	TRUE	0.283157	1579	Structural
Node1473	ON779834.1	13125	ORF1a_polyprotein	Mesocricetus auratus	Homo sapiens	Coronaviridae_12	Coronaviridae	TRUE	-0.039745	1579	Replication-associated
Node1473	ON779834.1	21195	ORF1ab_polyprotein	Mesocricetus auratus	Homo sapiens	Coronaviridae_12	Coronaviridae	TRUE	-0.0761211	1579	Replication-associated
Node1473	ON779834.1	828	ORF3a_protein	Mesocricetus auratus	Homo sapiens	Coronaviridae_12	Coronaviridae	TRUE	0.0190952	1579	Auxiliary
Node1473	ON779834.1	186	ORF6_protein	Mesocricetus auratus	Homo sapiens	Coronaviridae_12	Coronaviridae	TRUE	-0.429324	1579	Auxiliary
Node1473	ON779834.1	3705	surface_glycoprotein	Mesocricetus auratus	Homo sapiens	Coronaviridae_12	Coronaviridae	TRUE	1.07688	1579	Entry
Node1473	ON779950.1	669	membrane_glycoprotein	Mesocricetus auratus	Homo sapiens	Coronaviridae_12	Coronaviridae	TRUE	-0.0174458	1579	Structural
Node1473	ON779950.1	1251	nucleocapsid_phosphoprotein	Mesocricetus auratus	Homo sapiens	Coronaviridae_12	Coronaviridae	TRUE	0.283157	1579	Structural
Node1473	ON779950.1	13125	ORF1a_polyprotein	Mesocricetus auratus	Homo sapiens	Coronaviridae_12	Coronaviridae	TRUE	-0.11902	1579	Replication-associated
Node1473	ON779950.1	21195	ORF1ab_polyprotein	Mesocricetus auratus	Homo sapiens	Coronaviridae_12	Coronaviridae	TRUE	-0.0761211	1579	Replication-associated
Node1473	ON779950.1	828	ORF3a_protein	Mesocricetus auratus	Homo sapiens	Coronaviridae_12	Coronaviridae	TRUE	0.0190952	1579	Auxiliary
Node1473	ON779950.1	186	ORF6_protein	Mesocricetus auratus	Homo sapiens	Coronaviridae_12	Coronaviridae	TRUE	-0.429324	1579	Auxiliary
Node1473	ON779950.1	3705	surface_glycoprotein	Mesocricetus auratus	Homo sapiens	Coronaviridae_12	Coronaviridae	TRUE	1.07688	1579	Entry
Node1473	ON798946.1	669	membrane_glycoprotein	Mesocricetus auratus	Homo sapiens	Coronaviridae_12	Coronaviridae	TRUE	-0.0174458	1579	Structural
Node1473	ON798946.1	1251	nucleocapsid_phosphoprotein	Mesocricetus auratus	Homo sapiens	Coronaviridae_12	Coronaviridae	TRUE	0.283157	1579	Structural
Node1473	ON798946.1	13125	ORF1a_polyprotein	Mesocricetus auratus	Homo sapiens	Coronaviridae_12	Coronaviridae	TRUE	-0.119051	1579	Replication-associated
Node1473	ON798946.1	21195	ORF1ab_polyprotein	Mesocricetus auratus	Homo sapiens	Coronaviridae_12	Coronaviridae	TRUE	-0.0939458	1579	Replication-associated
Node1473	ON798946.1	828	ORF3a_protein	Mesocricetus auratus	Homo sapiens	Coronaviridae_12	Coronaviridae	TRUE	-0.583312	1579	Auxiliary
Node1473	ON798946.1	186	ORF6_protein	Mesocricetus auratus	Homo sapiens	Coronaviridae_12	Coronaviridae	TRUE	-0.429324	1579	Auxiliary
Node1473	ON798946.1	3705	surface_glycoprotein	Mesocricetus auratus	Homo sapiens	Coronaviridae_12	Coronaviridae	TRUE	0.805379	1579	Entry
Node1473	ON798985.1	669	membrane_glycoprotein	Mesocricetus auratus	Homo sapiens	Coronaviridae_12	Coronaviridae	TRUE	-0.0174458	1579	Structural
Node1473	ON798985.1	1251	nucleocapsid_phosphoprotein	Mesocricetus auratus	Homo sapiens	Coronaviridae_12	Coronaviridae	TRUE	0.283157	1579	Structural
Node1473	ON798985.1	13125	ORF1a_polyprotein	Mesocricetus auratus	Homo sapiens	Coronaviridae_12	Coronaviridae	TRUE	-0.119054	1579	Replication-associated
Node1473	ON798985.1	21195	ORF1ab_polyprotein	Mesocricetus auratus	Homo sapiens	Coronaviridae_12	Coronaviridae	TRUE	-0.214662	1579	Replication-associated
Node1473	ON798985.1	828	ORF3a_protein	Mesocricetus auratus	Homo sapiens	Coronaviridae_12	Coronaviridae	TRUE	-0.583312	1579	Auxiliary
Node1473	ON798985.1	186	ORF6_protein	Mesocricetus auratus	Homo sapiens	Coronaviridae_12	Coronaviridae	TRUE	-0.429324	1579	Auxiliary
Node1473	ON798985.1	3705	surface_glycoprotein	Mesocricetus auratus	Homo sapiens	Coronaviridae_12	Coronaviridae	TRUE	0.629568	1579	Entry
Node1473	ON833990.1	669	membrane_glycoprotein	Mesocricetus auratus	Homo sapiens	Coronaviridae_12	Coronaviridae	TRUE	-0.0174458	1579	Structural
Node1473	ON833990.1	1251	nucleocapsid_phosphoprotein	Mesocricetus auratus	Homo sapiens	Coronaviridae_12	Coronaviridae	TRUE	0.283157	1579	Structural
Node1473	ON833990.1	12984	ORF1a_polyprotein	Mesocricetus auratus	Homo sapiens	Coronaviridae_12	Coronaviridae	TRUE	-0.0938443	1579	Replication-associated
Node1473	ON833990.1	21054	ORF1ab_polyprotein	Mesocricetus auratus	Homo sapiens	Coronaviridae_12	Coronaviridae	TRUE	-0.054154	1579	Replication-associated
Node1473	ON833990.1	828	ORF3a_protein	Mesocricetus auratus	Homo sapiens	Coronaviridae_12	Coronaviridae	TRUE	-0.282724	1579	Auxiliary
Node1473	ON833990.1	186	ORF6_protein	Mesocricetus auratus	Homo sapiens	Coronaviridae_12	Coronaviridae	TRUE	-0.429324	1579	Auxiliary
Node1473	ON833990.1	3705	surface_glycoprotein	Mesocricetus auratus	Homo sapiens	Coronaviridae_12	Coronaviridae	TRUE	0.77167	1579	Entry
Node1473	ON849049.1	1251	nucleocapsid_phosphoprotein	Mesocricetus auratus	Homo sapiens	Coronaviridae_12	Coronaviridae	TRUE	0.380392	1579	Structural
Node1473	ON849049.1	12987	ORF1a_polyprotein	Mesocricetus auratus	Homo sapiens	Coronaviridae_12	Coronaviridae	TRUE	-0.186408	1579	Replication-associated
Node1473	ON849049.1	21051	ORF1ab_polyprotein	Mesocricetus auratus	Homo sapiens	Coronaviridae_12	Coronaviridae	TRUE	-0.189154	1579	Replication-associated
Node1473	ON849049.1	825	ORF3a_protein	Mesocricetus auratus	Homo sapiens	Coronaviridae_12	Coronaviridae	TRUE	-0.282645	1579	Auxiliary
Node1473	ON849049.1	3702	surface_glycoprotein	Mesocricetus auratus	Homo sapiens	Coronaviridae_12	Coronaviridae	TRUE	1.07616	1579	Entry
Node1473	ON872788.1	1251	nucleocapsid_phosphoprotein	Mesocricetus auratus	Homo sapiens	Coronaviridae_12	Coronaviridae	TRUE	0.175991	1579	Structural
Node1473	ON872788.1	13116	ORF1a_polyprotein	Mesocricetus auratus	Homo sapiens	Coronaviridae_12	Coronaviridae	TRUE	-0.234003	1579	Replication-associated
[truncated: 27,481 more rows]
